# Supplementary material for: Pliocene Model Intercomparison Project (PlioMIP): experimental design and boundary conditions (Experiment 2)
Source: Copernicus journal article supplement (doi:10.5194/gmd-4-571-2011), 2011-07-01
Supplement: Supplementary file 2 [file gmd-4-571-2011-supplement.zip]

Archive with 46 entries (43 files):
- PlioMIP_exp2_version1/exp2_alternate/
- PlioMIP_exp2_version1/exp2_alternate/.DS_Store
- PlioMIP_exp2_version1/exp2_alternate/biome_veg_v1.2.nc
- PlioMIP_exp2_version1/exp2_alternate/biome_veg_v1.2.xls
- PlioMIP_exp2_version1/exp2_alternate/CONTENTS OF PLIOMIP PACKAGES.pdf
- PlioMIP_exp2_version1/exp2_alternate/exp_2_protocol.html
- PlioMIP_exp2_version1/exp2_alternate/Global_dot_v2.0.nc
- PlioMIP_exp2_version1/exp2_alternate/Global_dot_v2.0.xls
- PlioMIP_exp2_version1/exp2_alternate/key_to_vegetation_values.html
- PlioMIP_exp2_version1/exp2_alternate/land_fraction_v1.3.nc
- PlioMIP_exp2_version1/exp2_alternate/land_fraction_v1.3.xls
- PlioMIP_exp2_version1/exp2_alternate/lev_94_dec_1.nc
- PlioMIP_exp2_version1/exp2_alternate/lev_94_dec_1.xls
- PlioMIP_exp2_version1/exp2_alternate/mbiome_veg_v1.2.nc
- PlioMIP_exp2_version1/exp2_alternate/mbiome_veg_v1.2.xls
- PlioMIP_exp2_version1/exp2_alternate/PRISM3_modern_topo.nc
- PlioMIP_exp2_version1/exp2_alternate/PRISM3_modern_topo.xls
- PlioMIP_exp2_version1/exp2_alternate/Protocol_Notes.pdf
- PlioMIP_exp2_version1/exp2_alternate/topo_v1.4.nc
- PlioMIP_exp2_version1/exp2_alternate/topo_v1.4.xls
- PlioMIP_exp2_version1/exp2_preferred/
- PlioMIP_exp2_version1/exp2_preferred/.DS_Store
- PlioMIP_exp2_version1/exp2_preferred/biome_veg_v1.3.nc
- PlioMIP_exp2_version1/exp2_preferred/biome_veg_v1.3.xls
- PlioMIP_exp2_version1/exp2_preferred/CONTENTS OF PLIOMIP PACKAGES.pdf
- PlioMIP_exp2_version1/exp2_preferred/exp_2_protocol.html
- PlioMIP_exp2_version1/exp2_preferred/Global_dot_v2.0.nc
- PlioMIP_exp2_version1/exp2_preferred/Global_dot_v2.0.xls
- PlioMIP_exp2_version1/exp2_preferred/key_to_vegetation_values.html
- PlioMIP_exp2_version1/exp2_preferred/land_fraction_v1.1.nc
- PlioMIP_exp2_version1/exp2_preferred/land_fraction_v1.1.xls
- PlioMIP_exp2_version1/exp2_preferred/lev_94_dec_1.nc
- PlioMIP_exp2_version1/exp2_preferred/lev_94_dec_1.xls
- PlioMIP_exp2_version1/exp2_preferred/mbiome_veg_v1.3.nc
- PlioMIP_exp2_version1/exp2_preferred/mbiome_veg_v1.3.xls
- PlioMIP_exp2_version1/exp2_preferred/PRISM3_modern_topo.nc
- PlioMIP_exp2_version1/exp2_preferred/PRISM3_modern_topo.xls
- PlioMIP_exp2_version1/exp2_preferred/Protocol_Notes.pdf
- PlioMIP_exp2_version1/exp2_preferred/topo_v1.1.nc
- PlioMIP_exp2_version1/exp2_preferred/topo_v1.1.xls
- PlioMIP_exp2_version1/protocols_and_notes/
- PlioMIP_exp2_version1/protocols_and_notes/.DS_Store
- PlioMIP_exp2_version1/protocols_and_notes/CONTENTS OF PLIOMIP PACKAGES.pdf
- PlioMIP_exp2_version1/protocols_and_notes/exp_1_protocol.html
- PlioMIP_exp2_version1/protocols_and_notes/exp_2_protocol.html
- PlioMIP_exp2_version1/protocols_and_notes/Protocol_Notes.pdf
