# Supplementary material for: Pliocene Model Intercomparison Project (PlioMIP): experimental design and boundary conditions (Experiment 2)
Source: Copernicus journal article supplement (doi:10.5194/gmd-4-571-2011), 2011-07-01
Supplement: Supplementary file 2 [file gmd-4-571-2011-supplement.zip › PlioMIP_exp2_version1/exp2_alternate/Global_dot_v2.0.xls]

## Sheet: 0.0 m
	-177.5	-172.5	-167.5	-162.5	-157.5	-152.5	-147.5	-142.5	-137.5	-132.5	-127.5	-122.5	-117.5	-112.5	-107.5	-102.5	-97.5	-92.5	-87.5	-82.5	-77.5	-72.5	-67.5	-62.5	-57.5	-52.5	-47.5	-42.5	-37.5	-32.5	-27.5	-22.5	-17.5	-12.5	-7.5	-2.5	2.5	7.5	12.5	17.5	22.5	27.5	32.5	37.5	42.5	47.5	52.5	57.5	62.5
86	-1.5398	-1.5492	-1.5543	-1.5666	-1.5877	-1.6045	-1.6218	-1.6396	-1.6582	-1.674	-1.6884	-1.6847	-1.6723	-1.6528	-1.6145	-1.5657	-1.5139	-1.4665	-1.4293	-1.3484	-1.3051	-1.2787	-1.2617	-1.2549	-1.288	-1.3381	-1.3591	-1.413	-1.453	-1.4784	-1.5084	-1.5599	-1.5878	0.0644	1.3174	1.4142	1.5779	1.5662	1.524	1.5112	1.4462	0.8215	0.4214	0.3594	-0.919	-1.0218	-1.214	-1.1471	-1.0587
82	-1.2292	-1.2267	-1.2219	-1.2041	-1.183	-1.1609	-1.1363	-1.1098	-1.0775	-1.0546	-1.0741	-1.0987	-1.117	-1.1252	-1.036	-0.8979	-0.6995	NaN	NaN	NaN	NaN	NaN	NaN	NaN	NaN	NaN	NaN	NaN	NaN	NaN	NaN	NaN	NaN	0.3217	3.7234	6.3764	8.5093	9.6739	9.5033	6.5943	3.8393	1.7261	0.9329	0.2136	-0.9675	-1.7868	-1.794	-1.6406	-1.4365
78	-0.9621	-0.9604	-1.0646	-1.1897	-1.2689	-1.3194	-1.3213	-1.2137	-0.9795	-0.7008	-0.5998	-0.6288	-0.6901	NaN	-1.3455	-1.7178	-2.0831	NaN	NaN	NaN	NaN	-1.2995	NaN	NaN	NaN	NaN	NaN	NaN	NaN	NaN	NaN	NaN	-2.2011	0.3819	4.5683	8.6466	11.5867	13.7707	NaN	NaN	NaN	5.2004	4.9724	3.2608	1.151	0.8632	0.4076	-0.0056	-0.0577
74	-0.9086	-0.5858	-0.6061	-0.8176	-0.9193	-0.9836	-1.165	-1.1229	-0.7644	-0.3888	-0.3521	NaN	NaN	NaN	NaN	-1.1163	NaN	NaN	NaN	NaN	NaN	0.482	0.5006	0.2636	NaN	NaN	NaN	NaN	NaN	NaN	NaN	NaN	-0.4048	1.7957	7.0926	12.1711	13.7799	12.6719	10.4314	9.6376	8.8668	8.6781	8.1549	6.6878	4.4087	3.6169	3.6423	NaN	1.9771
70	0.748	2.1007	2.722	NaN	NaN	NaN	NaN	NaN	NaN	NaN	NaN	NaN	NaN	NaN	NaN	NaN	NaN	NaN	NaN	NaN	NaN	NaN	NaN	0.2374	2.3204	NaN	NaN	NaN	NaN	NaN	NaN	NaN	3.5438	6.227	10.3026	14.4522	15.5089	14.945	13.1848	NaN	NaN	NaN	NaN	8.1811	5.7776	6.3553	7.4426	6.4322	NaN
66	NaN	NaN	4.8324	NaN	NaN	NaN	NaN	NaN	NaN	NaN	NaN	NaN	NaN	NaN	NaN	NaN	NaN	NaN	NaN	NaN	NaN	NaN	NaN	0.2423	2.6965	NaN	NaN	NaN	NaN	5.8211	7.2112	NaN	NaN	11.6047	13.9639	16.4455	15.9857	14.7338	NaN	NaN	NaN	NaN	NaN	NaN	NaN	NaN	NaN	NaN	NaN
62	6.0443	5.577	7.1458	NaN	NaN	NaN	NaN	NaN	NaN	NaN	NaN	NaN	NaN	NaN	NaN	NaN	NaN	NaN	NaN	NaN	NaN	NaN	NaN	2.804	3.955	3.9571	NaN	NaN	8.5722	10.6063	12.1198	13.5573	13.9729	15.6357	17.9817	17.0489	15.3339	NaN	NaN	NaN	NaN	NaN	NaN	NaN	NaN	NaN	NaN	NaN	NaN
58	7.1722	6.5181	6.4241	NaN	NaN	8.9097	9.8609	10.3676	NaN	NaN	NaN	NaN	NaN	NaN	NaN	NaN	NaN	NaN	NaN	NaN	NaN	NaN	NaN	NaN	3.5692	5.5081	6.4654	7.4714	9.9797	12.1633	13.4993	14.8669	15.2691	17.5824	17.8855	NaN	13.933	NaN	NaN	10.7773	NaN	NaN	NaN	NaN	NaN	NaN	NaN	NaN	NaN
54	7.4068	7.5497	7.7842	8.3114	8.956	9.436	9.8103	10.4737	10.9502	11.5314	NaN	NaN	NaN	NaN	NaN	NaN	NaN	NaN	NaN	NaN	NaN	NaN	NaN	NaN	NaN	5.1669	8.4803	10.3575	11.1635	13.0612	14.7954	16.2873	16.7323	18.4591	NaN	NaN	13.2812	NaN	NaN	NaN	NaN	NaN	NaN	NaN	NaN	NaN	NaN	NaN	NaN
50	8.4469	8.5937	8.4722	8.8971	9.4551	10.3325	10.6285	11.4011	12.2638	12.5732	NaN	NaN	NaN	NaN	NaN	NaN	NaN	NaN	NaN	NaN	NaN	NaN	NaN	NaN	NaN	5.5649	8.7635	13.632	15.4128	15.8291	16.816	17.7424	18.153	19.3472	19.9926	NaN	NaN	NaN	NaN	NaN	NaN	NaN	NaN	NaN	NaN	NaN	NaN	NaN	NaN
46	11.2376	11.1133	11.3054	11.699	12.2545	12.7303	13.0497	13.4223	13.8288	13.7402	13.8497	NaN	NaN	NaN	NaN	NaN	NaN	NaN	NaN	NaN	NaN	NaN	NaN	7.9546	8.641	7.5657	10.2662	16.9695	18.8271	18.8072	19.1534	19.2534	19.0347	19.0009	18.9391	NaN	NaN	NaN	NaN	NaN	NaN	NaN	NaN	NaN	NaN	NaN	NaN	NaN	NaN
42	15.5803	15.6453	15.4279	15.3713	15.6093	15.6389	16.0464	16.2987	16.0498	15.5746	14.8217	NaN	NaN	NaN	NaN	NaN	NaN	NaN	NaN	NaN	NaN	NaN	12.4975	14.4509	16.8112	16.6147	18.1094	21.6429	21.065	20.8332	20.2917	20.1593	19.4192	19.3105	NaN	NaN	NaN	19.5791	NaN	NaN	NaN	NaN	NaN	NaN	NaN	NaN	NaN	NaN	NaN
38	19.0788	18.6238	18.1945	18.3132	18.6417	18.5136	18.6626	18.2836	18.2402	17.656	16.1449	NaN	NaN	NaN	NaN	NaN	NaN	NaN	NaN	NaN	NaN	19.6696	22.4784	23.9657	24.2943	23.9318	23.2982	23.0781	22.0983	21.6166	20.8689	21.0875	20.6992	20.3855	NaN	NaN	20.7586	20.6638	20.7256	21.0062	NaN	NaN	NaN	NaN	NaN	NaN	NaN	NaN	NaN
34	20.5334	20.203	19.985	20.0943	20.515	20.539	20.7934	20.6991	20.2132	19.3621	18.0402	16.7528	NaN	NaN	NaN	NaN	NaN	NaN	NaN	NaN	NaN	24.6069	24.3547	24.2024	24.0414	23.3809	23.2358	23.081	22.9267	22.5552	22.0096	21.7247	21.4555	20.8735	NaN	NaN	NaN	NaN	NaN	22.0611	21.651	21.7941	22.8672	NaN	NaN	NaN	NaN	NaN	NaN
30	23.0671	22.9084	22.4595	22.701	23.2189	23.0274	22.7734	22.4377	21.7069	20.8648	19.9422	19.1597	19.1424	NaN	NaN	NaN	NaN	NaN	NaN	NaN	25.4654	24.723	24.166	24.223	24.1756	24.0288	23.7747	23.5067	23.6213	23.5507	23.1789	22.5375	22.1294	21.1606	NaN	NaN	NaN	NaN	NaN	NaN	NaN	NaN	NaN	NaN	NaN	NaN	NaN	NaN	NaN
26	25.2908	25.2685	25.1015	24.977	25.0582	24.7097	24.2413	23.6357	22.8976	22.1304	21.6628	21.2816	21.1363	NaN	NaN	NaN	NaN	25.2799	26.4325	25.0916	26.5501	25.9385	25.9352	26.085	25.7789	25.2708	24.9989	24.7552	24.5823	23.9257	23.4264	22.9727	21.6747	NaN	NaN	NaN	NaN	NaN	NaN	NaN	NaN	NaN	NaN	NaN	NaN	NaN	25.7714	NaN	NaN
22	26.1338	26.065	26.304	26.2013	25.8059	25.5724	25.2027	24.7228	24.0077	23.9244	23.3064	22.8698	23.3762	25.0711	26.5877	NaN	NaN	26.6287	27.0117	27.8441	27.4961	27.126	26.9603	26.9649	26.4893	26.0139	25.7336	25.5206	25.1046	24.5632	23.8666	23.0193	19.7067	NaN	NaN	NaN	NaN	NaN	NaN	NaN	NaN	NaN	NaN	NaN	NaN	NaN	NaN	NaN	26.3274
18	27.1257	26.893	26.9717	26.7047	26.3261	25.9098	25.8996	25.6587	25.609	25.5817	25.2069	25.4342	25.7379	26.462	28.3258	NaN	NaN	NaN	NaN	27.8763	28.0659	NaN	27.6261	27.37	26.9589	26.6358	26.238	25.8686	25.5142	25.0889	24.5386	24.0526	22.0066	NaN	NaN	NaN	NaN	NaN	NaN	NaN	NaN	NaN	NaN	NaN	NaN	NaN	NaN	25.9103	26.4459
14	27.0953	26.8545	26.7726	26.938	26.5903	26.4889	26.4987	26.4775	26.4853	26.462	26.4631	26.6239	27.2161	27.8818	28.2689	28.4676	28.4014	NaN	NaN	27.9678	27.7725	27.4769	27.6752	27.6725	27.576	27.1677	26.7031	26.3942	26.1118	25.8213	25.5488	25.3737	23.8098	NaN	NaN	NaN	NaN	NaN	NaN	NaN	NaN	NaN	NaN	NaN	NaN	NaN	26.4652	26.2295	26.2553
10	27.6632	27.4264	27.2686	27.262	26.8353	26.8926	26.9681	26.9711	27.0634	26.8576	26.9082	26.8352	27.2068	28.0575	28.1467	28.1845	27.9934	27.9819	27.8723	NaN	27.8988	NaN	NaN	NaN	27.9407	27.758	27.2141	26.9321	26.9332	26.866	26.6125	26.5213	25.363	NaN	NaN	NaN	NaN	NaN	NaN	NaN	NaN	NaN	NaN	NaN	NaN	NaN	26.4512	26.5558	26.6816
6	28.6332	28.5534	28.4441	27.9461	27.7147	27.8379	27.7013	27.9343	27.4844	27.6511	27.3909	26.8258	27.1416	27.5246	28.1143	27.6869	27.9409	28.2015	28.1254	27.8686	NaN	NaN	NaN	NaN	NaN	NaN	27.3709	27.2936	27.2359	27.1612	27.1549	27.2607	27.1023	NaN	NaN	NaN	NaN	NaN	NaN	NaN	NaN	NaN	NaN	NaN	NaN	NaN	26.6811	27.2358	28.0269
2	28.4295	28.6223	28.4678	27.6523	27.0728	27.0412	27.0125	27.1079	26.291	26.6759	26.2143	25.5882	25.6216	26.1363	26.3968	26.0013	26.9116	27.8904	27.8111	27.5071	NaN	NaN	NaN	NaN	NaN	NaN	27.4126	27.1996	27.1286	27.1075	27.0753	27.4145	26.8673	27.2705	27.0003	27.4936	27.8457	28.1437	NaN	NaN	NaN	NaN	NaN	NaN	NaN	26.6212	27.192	27.9226	28.6914
-2	28.4836	28.3388	28.1375	27.9117	27.336	27.2005	27.1219	26.8835	26.0304	25.8495	25.3166	24.0783	24.863	25.135	25.3581	24.6766	24.5584	25.9944	26.238	25.825	NaN	NaN	NaN	NaN	NaN	NaN	NaN	NaN	27.2931	27.4417	27.0273	26.9026	26.1605	26.0124	26.0543	26.5674	26.9542	26.9536	NaN	NaN	NaN	NaN	NaN	NaN	NaN	27.1566	27.6456	28.2909	28.7366
-6	29.2145	28.9478	28.7876	28.7873	28.4213	28.5093	28.1192	27.9357	27.8321	27.3252	26.2184	25.4603	26.0159	25.7478	26.1768	25.3778	25.6545	26.5518	26.2399	NaN	NaN	NaN	NaN	NaN	NaN	NaN	NaN	NaN	NaN	27.6049	27.3871	26.9935	26.3692	26.134	26.106	26.1779	26.4423	26.8719	NaN	NaN	NaN	NaN	NaN	NaN	27.1966	27.5937	27.7857	28.0255	27.9395
-10	29.1329	28.9645	28.8975	28.8402	28.889	28.826	28.7245	28.6371	28.5527	28.0865	27.5168	26.7726	26.7465	26.5005	26.5025	25.6647	25.9656	26.1448	26.2631	25.9469	NaN	NaN	NaN	NaN	NaN	NaN	NaN	NaN	NaN	27.5017	27.1514	27.024	26.871	26.3406	25.7293	25.5511	25.7384	26.1707	25.7304	NaN	NaN	NaN	NaN	NaN	27.4059	27.4113	27.4808	27.5747	27.4652
-14	28.6759	28.4488	28.5198	28.5274	28.5005	28.4493	28.583	28.5932	28.1944	27.9859	28.0012	26.9382	26.2215	26.529	26.1798	25.3311	25.7515	25.6655	25.7188	26.1381	24.4796	NaN	NaN	NaN	NaN	NaN	NaN	NaN	NaN	26.891	26.503	25.6922	26.0583	25.8981	25.1879	24.51	24.2741	24.0617	NaN	NaN	NaN	NaN	NaN	NaN	27.5657	NaN	27.2199	27.2431	27.2999
-18	27.5235	27.6234	27.8873	27.4505	27.5743	27.7159	27.7112	27.5478	27.5099	27.4263	26.7807	25.7374	25.2359	25.7236	25.3644	25.608	25.3369	25.2236	24.4939	24.2859	25.3344	NaN	NaN	NaN	NaN	NaN	NaN	NaN	26.9069	26.7099	26.431	24.784	25.3544	25.2178	24.7434	24.5245	23.6271	22.4866	NaN	NaN	NaN	NaN	NaN	NaN	27.4741	NaN	27.0864	26.7691	26.4994
-22	26.2836	26.3395	25.9424	25.7589	26.1015	25.9457	25.9833	26.0197	26.4234	26.0791	25.1771	24.665	25.0483	25.3466	25.8354	25.7014	24.5113	24.3846	23.7778	22.4891	23.3748	24.7774	NaN	NaN	NaN	NaN	NaN	NaN	26.5632	26.6559	26.4967	25.7258	25.4619	25.102	24.2687	24.2849	23.3741	22.1497	19.1162	NaN	NaN	NaN	NaN	27.1331	27.0771	NaN	26.3132	26.0726	25.6623
-26	24.7533	24.6418	24.0481	24.3374	24.6446	24.438	24.1556	24.5303	24.969	24.682	24.7584	24.6194	25.1491	25.3017	25.0782	24.31	24.0967	23.3282	23.2485	21.9967	21.7322	22.8146	NaN	NaN	NaN	NaN	NaN	25.6688	26.2605	25.5976	25.1179	24.8571	24.9272	25.1614	24.2125	23.6545	23.2205	22.0813	19.3613	NaN	NaN	NaN	NaN	26.0522	26.0234	25.8872	25.5662	25.2795	25.1445
-30	23.1553	22.6799	22.8071	22.6358	23.8431	23.0264	22.7561	23.3802	23.8108	23.5288	23.397	23.8244	24.1708	23.9428	23.598	23.0405	23.4727	22.3496	21.9751	21.4995	20.3977	NaN	NaN	NaN	NaN	NaN	24.1221	24.3889	24.2366	23.7665	23.4135	23.2093	23.0798	23.9159	23.457	22.7411	22.4959	21.8331	20.855	NaN	NaN	NaN	NaN	24.7005	24.6155	24.3977	24.4058	23.7694	23.5524
-34	21.2716	20.5338	20.5378	20.0328	20.5978	20.2634	20.4489	20.8563	20.9442	20.8415	21.0917	21.259	20.3244	21.3207	21.6025	21.4486	21.4314	21.441	20.8783	20.4243	19.2977	NaN	NaN	NaN	NaN	21.7181	22.8376	22.2383	22.1289	21.9644	21.478	21.508	21.5191	21.5754	20.8109	20.2639	20.284	20.3129	20.8914	NaN	NaN	NaN	23.9436	22.4189	22.4148	22.3147	22.5649	22.302	21.5216
-38	19.5482	18.6087	18.4517	18.5488	18.2877	17.96	17.9623	17.8483	18.1068	18.2354	18.0016	17.7958	17.3574	18.3699	18.6772	18.2694	18.1206	18.5867	19.0696	18.8731	18.1046	NaN	NaN	NaN	NaN	20.2833	21.0333	19.3649	19.5849	19.5701	18.785	17.8585	17.8692	18.2451	17.5384	17.0089	16.386	15.7644	18.6126	20.9013	22.2603	21.0339	21.3204	21.2658	21.0574	18.75	19.5236	20.3268	19.2932
-42	17.3843	17.2673	16.5452	16.1788	15.9057	15.6514	15.7752	15.9104	16.2177	16.0105	15.3155	15.1561	14.9098	15.3037	14.5526	14.6738	14.4429	14.7163	15.1304	16.2835	16.0194	NaN	NaN	16.9013	14.3978	17.4693	17.5537	15.4226	14.8713	15.501	15.304	13.8577	13.8143	14.6037	13.1876	12.9595	12.2735	12.5643	14.8253	15.7426	17.1612	16.0744	14.8347	15.4802	14.483	12.4397	14.1267	16.2005	16.2192
-46	14.1363	14.7624	15.0429	14.9898	14.043	13.4653	13.6888	14.0107	13.7594	13.2316	12.703	12.4922	11.6848	11.4756	11.2316	11.8917	11.9189	11.5929	12.9803	14.7409	13.8039	NaN	NaN	13.0745	12.2427	14.241	14.3147	12.8	11.3317	11.1497	10.7109	10.0519	9.7025	9.1138	8.2697	8.792	8.9156	9.7516	9.5912	8.5959	8.9855	10.0248	10.0339	9.1974	7.9674	7.3178	7.9569	9.7371	10.1604
-50	12.2104	12.6814	12.7254	12.6592	12.5728	11.9078	12.0747	12.4078	11.8132	11.342	10.8197	10.8228	9.6989	9.1282	10.2535	10.7386	10.2731	9.3425	10.0876	10.4372	12.0327	NaN	NaN	10.917	10.0916	9.8502	9.2488	7.9687	7.0589	6.516	6.4313	6.2083	6.1672	5.6175	5.1146	5.1367	5.2807	5.5323	5.1043	4.6231	4.8964	5.5399	5.6654	5.8615	5.2789	5.6417	6.2918	5.7111	5.7408
-54	10.421	10.4368	10.439	9.6335	9.3405	8.6427	8.1426	8.247	8.3112	8.1947	8.4916	8.7398	8.7103	9.1053	9.5114	9.2766	8.8144	8.3241	8.239	8.7579	9.8805	NaN	NaN	8.7889	8.5288	7.2912	5.7756	4.6785	4.0651	3.3569	3.4479	3.5692	3.728	3.8945	3.6695	3.3259	2.8096	2.7257	2.5541	2.5196	2.9832	3.245	3.2089	3.7375	3.705	4.0972	4.4059	3.6342	3.8388
-58	7.5909	7.0071	6.621	6.9199	5.6807	4.5681	4.182	4.8372	5.3472	5.4192	5.7778	6.0335	6.2272	6.032	6.4566	7.1243	7.1839	7.0547	7.3659	7.6445	7.543	7.6053	6.7379	5.8648	5.268	4.3293	3.6097	3.3863	2.9229	2.5808	2.6144	3.0036	2.8339	2.4312	2.3729	2.5077	2.0787	1.7354	2.0768	1.9233	2.6662	2.8681	2.7121	2.7375	3.2394	3.736	3.4838	2.7634	2.8401
-62	5.0198	4.6386	4.0381	4.1114	3.3983	2.7163	2.6893	3.1155	3.6116	3.67	4.0523	4.56	4.3657	3.9919	4.2768	4.7028	4.6569	4.274	4.4535	4.723	4.3303	3.914	3.1973	NaN	NaN	1.3937	1.8965	1.9582	1.2417	1.2593	1.652	1.9616	1.8635	2.2375	3.1495	3.0386	1.9949	1.7279	1.7506	2.3521	2.5201	2.5087	2.4558	2.5888	2.9659	3.1565	2.6372	2.4418	2.4443
-66	2.79	2.9209	2.8001	2.9884	2.7769	2.0792	1.5286	1.3795	1.3685	1.4846	1.7846	2.0146	1.5035	1.6777	2.0432	2.021	1.99	1.8632	2.2005	2.3175	2.1167	1.9575	1.3771	NaN	-0.6888	-0.535	-0.1968	0.4068	0.6516	1.0223	1.3572	1.7321	2.1709	2.7913	3.4048	2.9865	2.3178	2.3831	2.4169	2.2953	2.0736	1.7146	1.0478	1.3896	1.3388	0.9103	NaN	NaN	1.281
-70	0.6319	0.7092	0.6955	0.8054	0.8071	0.5485	0.2683	0.3368	0.32	0.2128	0.0879	0.138	0.4104	0.5302	0.5688	0.4337	0.0026	0.1721	0.5526	0.7716	0.6151	NaN	NaN	NaN	NaN	-1.6423	-1.2457	-0.3972	-0.0211	0.6307	0.8966	0.9815	0.7408	NaN	NaN	NaN	NaN	NaN	NaN	NaN	NaN	NaN	NaN	NaN	NaN	NaN	NaN	NaN	NaN
-74	-0.1736	-0.3227	-0.4083	-0.3963	-0.4038	-0.2655	NaN	NaN	NaN	NaN	NaN	NaN	NaN	0.3617	1.5391	0.9817	NaN	NaN	NaN	NaN	NaN	NaN	NaN	NaN	-1.5504	-1.6314	-1.6578	-1.4735	-1.1611	-0.8159	NaN	NaN	NaN	NaN	NaN	NaN	NaN	NaN	NaN	NaN	NaN	NaN	NaN	NaN	NaN	NaN	NaN	NaN	NaN
-78	-0.9459	-1.0723	-1.1816	-1.2828	NaN	NaN	NaN	NaN	NaN	NaN	NaN	NaN	NaN	NaN	NaN	NaN	NaN	NaN	NaN	NaN	NaN	NaN	NaN	NaN	NaN	NaN	NaN	-1.5949	-1.4959	NaN	NaN	NaN	NaN	NaN	NaN	NaN	NaN	NaN	NaN	NaN	NaN	NaN	NaN	NaN	NaN	NaN	NaN	NaN	NaN
-82	NaN	NaN	NaN	NaN	NaN	NaN	NaN	NaN	NaN	NaN	NaN	NaN	NaN	NaN	NaN	NaN	NaN	NaN	NaN	NaN	NaN	NaN	NaN	NaN	NaN	NaN	NaN	NaN	NaN	NaN	NaN	NaN	NaN	NaN	NaN	NaN	NaN	NaN	NaN	NaN	NaN	NaN	NaN	NaN	NaN	NaN	NaN	NaN	NaN
-86	NaN	NaN	NaN	NaN	NaN	NaN	NaN	NaN	NaN	NaN	NaN	NaN	NaN	NaN	NaN	NaN	NaN	NaN	NaN	NaN	NaN	NaN	NaN	NaN	NaN	NaN	NaN	NaN	NaN	NaN	NaN	NaN	NaN	NaN	NaN	NaN	NaN	NaN	NaN	NaN	NaN	NaN	NaN	NaN	NaN	NaN	NaN	NaN	NaN
[truncated: 23 more columns]

## Sheet: 10.0 m
	-177.5	-172.5	-167.5	-162.5	-157.5	-152.5	-147.5	-142.5	-137.5	-132.5	-127.5	-122.5	-117.5	-112.5	-107.5	-102.5	-97.5	-92.5	-87.5	-82.5	-77.5	-72.5	-67.5	-62.5	-57.5	-52.5	-47.5	-42.5	-37.5	-32.5	-27.5	-22.5	-17.5	-12.5	-7.5	-2.5	2.5	7.5	12.5	17.5	22.5	27.5	32.5	37.5	42.5	47.5	52.5	57.5	62.5
86	-1.68096	-1.68796	-1.69216	-1.69426	-1.69616	-1.69996	-1.70266	-1.70126	-1.69966	-1.69456	-1.69146	-1.68846	-1.68526	-1.68146	-1.67726	-1.66986	-1.66146	-1.65676	-1.65976	-1.64146	-1.62676	-1.61126	-1.59296	-1.57626	-1.57146	-1.57736	-1.58076	-1.59646	-1.62106	-1.63896	-1.64186	-1.66176	-1.68076	-0.0563596	1.17716	1.26981	1.42958	1.41718	1.37428	1.36228	1.28898	0.663953	0.263573	0.186748	-1.1005	-1.23275	-1.4424	-1.41105	-1.35435
82	-1.25825	-1.23885	-1.21325	-1.17925	-1.15015	-1.13135	-1.12465	-1.14125	-1.17495	-1.21365	-1.25605	-1.27095	-1.26615	-1.24575	-1.18155	-1.11705	-1.01145	NaN	NaN	NaN	NaN	NaN	NaN	NaN	NaN	NaN	NaN	NaN	NaN	NaN	NaN	NaN	NaN	0.32867	3.67929	6.30714	8.41657	9.56476	9.39154	6.51832	3.79544	1.71124	0.931309	0.215327	-0.956887	-1.74075	-1.72225	-1.56385	-1.32055
78	-1.22005	-1.14315	-1.17035	-1.23065	-1.26935	-1.29265	-1.29155	-1.24235	-1.10985	-0.95285	-0.93125	-0.96205	-0.95255	NaN	-1.36195	-1.53635	-1.82605	NaN	NaN	NaN	NaN	-1.04944	NaN	NaN	NaN	NaN	NaN	NaN	NaN	NaN	NaN	NaN	-2.15572	0.443486	4.64934	8.67855	11.5675	13.6893	NaN	NaN	NaN	4.85776	4.48692	2.71539	0.713012	0.603799	0.341619	0.118982	0.29397
74	-0.860698	-0.607814	-0.636825	-0.839084	-0.922748	-0.951148	-1.13785	-1.13685	-0.759732	-0.198041	0.0897519	NaN	NaN	NaN	NaN	-1.22465	NaN	NaN	NaN	NaN	NaN	0.542556	0.455912	0.195634	NaN	NaN	NaN	NaN	NaN	NaN	NaN	NaN	-0.452359	1.77257	7.07037	12.0574	13.6033	12.4768	10.267	9.47392	8.69194	8.45332	7.85713	6.38051	4.13495	3.33729	3.32612	NaN	1.55256
70	0.972226	2.08609	2.66604	NaN	NaN	NaN	NaN	NaN	NaN	NaN	NaN	NaN	NaN	NaN	NaN	NaN	NaN	NaN	NaN	NaN	NaN	NaN	NaN	0.281206	2.32172	NaN	NaN	NaN	NaN	NaN	NaN	NaN	3.55506	6.25421	10.3752	14.4682	15.363	14.7838	13.1246	NaN	NaN	NaN	NaN	8.24218	5.87695	6.37529	6.65398	5.36834	NaN
66	NaN	NaN	4.70312	NaN	NaN	NaN	NaN	NaN	NaN	NaN	NaN	NaN	NaN	NaN	NaN	NaN	NaN	NaN	NaN	NaN	NaN	NaN	NaN	0.269659	2.72366	NaN	NaN	NaN	NaN	5.85078	7.25078	NaN	NaN	11.5267	13.8484	16.285	15.8321	14.6342	NaN	NaN	NaN	NaN	NaN	NaN	NaN	NaN	NaN	NaN	NaN
62	6.0086	5.66467	6.93702	NaN	NaN	NaN	NaN	NaN	NaN	NaN	NaN	NaN	NaN	NaN	NaN	NaN	NaN	NaN	NaN	NaN	NaN	NaN	NaN	2.81885	4.02671	3.9886	NaN	NaN	8.61815	10.7058	12.3194	13.6947	13.9796	15.5633	17.8072	16.8998	15.2708	NaN	NaN	NaN	NaN	NaN	NaN	NaN	NaN	NaN	NaN	NaN	NaN
58	7.26214	6.45584	6.38409	NaN	NaN	8.87303	9.83919	10.3242	NaN	NaN	NaN	NaN	NaN	NaN	NaN	NaN	NaN	NaN	NaN	NaN	NaN	NaN	NaN	NaN	3.65212	5.58276	6.50078	7.55568	10.0823	12.413	14.3521	15.6415	15.5487	17.7262	17.8961	NaN	13.9223	NaN	NaN	10.9112	NaN	NaN	NaN	NaN	NaN	NaN	NaN	NaN	NaN
54	7.42677	7.57583	7.79759	8.29335	9.00335	9.60335	9.96312	10.5209	10.8977	11.3574	NaN	NaN	NaN	NaN	NaN	NaN	NaN	NaN	NaN	NaN	NaN	NaN	NaN	NaN	NaN	5.16303	8.51634	10.3694	11.1581	13.1022	15.1495	16.6447	16.9247	18.6817	NaN	NaN	13.2736	NaN	NaN	NaN	NaN	NaN	NaN	NaN	NaN	NaN	NaN	NaN	NaN
50	8.36898	8.55432	8.45883	8.87642	9.41695	10.4177	10.6388	11.4064	12.2547	12.5998	NaN	NaN	NaN	NaN	NaN	NaN	NaN	NaN	NaN	NaN	NaN	NaN	NaN	NaN	NaN	5.48821	8.73467	13.513	15.2741	15.6995	16.7634	17.6372	18.0742	19.2844	19.7891	NaN	NaN	NaN	NaN	NaN	NaN	NaN	NaN	NaN	NaN	NaN	NaN	NaN	NaN
46	11.5861	11.1997	11.195	11.5356	12.2404	12.9314	13.0296	13.4286	13.8595	13.8203	13.8564	NaN	NaN	NaN	NaN	NaN	NaN	NaN	NaN	NaN	NaN	NaN	NaN	7.78707	8.57784	7.50498	10.1461	16.8496	18.6411	18.5212	19.1758	19.2317	19.063	19.0716	18.8743	NaN	NaN	NaN	NaN	NaN	NaN	NaN	NaN	NaN	NaN	NaN	NaN	NaN	NaN
42	15.854	15.6591	15.4536	15.4116	15.7056	15.8573	16.1753	16.4043	16.1523	15.5723	14.7513	NaN	NaN	NaN	NaN	NaN	NaN	NaN	NaN	NaN	NaN	NaN	12.416	14.3667	16.7269	16.4371	17.977	21.5398	20.9172	20.6406	20.3322	20.2489	19.439	19.2669	NaN	NaN	NaN	19.4949	NaN	NaN	NaN	NaN	NaN	NaN	NaN	NaN	NaN	NaN	NaN
38	19.2373	18.6714	18.3593	18.5413	18.7864	18.5825	18.7136	18.4169	18.3072	17.642	16.0442	NaN	NaN	NaN	NaN	NaN	NaN	NaN	NaN	NaN	NaN	19.6373	22.4051	23.8964	24.1666	23.832	23.3002	23.0757	22.0835	21.5822	20.8701	21.1593	20.7688	20.3849	NaN	NaN	20.7214	20.6556	20.7053	21.019	NaN	NaN	NaN	NaN	NaN	NaN	NaN	NaN	NaN
34	20.6419	20.2786	20.0485	20.2152	20.66	20.5203	20.7489	20.75	20.1754	19.3508	17.9906	16.6453	NaN	NaN	NaN	NaN	NaN	NaN	NaN	NaN	NaN	24.6842	24.3698	24.2591	24.0259	23.379	23.2909	23.1506	23.0168	22.6219	22.0031	21.7386	21.5023	20.9188	NaN	NaN	NaN	NaN	NaN	22.1049	21.6892	21.7607	22.8819	NaN	NaN	NaN	NaN	NaN	NaN
30	23.0822	23.0457	22.5268	22.6836	23.2858	23.0079	22.7366	22.4056	21.6659	20.8546	19.889	19.0715	19.0329	NaN	NaN	NaN	NaN	NaN	NaN	NaN	25.4106	24.7578	24.157	24.2022	24.101	23.9932	23.8135	23.5184	23.6286	23.4985	23.1069	22.4897	22.1504	21.0828	NaN	NaN	NaN	NaN	NaN	NaN	NaN	NaN	NaN	NaN	NaN	NaN	NaN	NaN	NaN
26	25.2531	25.2719	25.1274	24.8486	25.0181	24.6793	24.2071	23.5206	22.8557	22.1353	21.6806	21.2441	21.049	NaN	NaN	NaN	NaN	25.3324	26.4312	25.0046	26.4812	25.9122	25.9089	26.0837	25.7629	25.2815	25.0743	24.7574	24.5942	23.9488	23.3988	22.9867	21.6197	NaN	NaN	NaN	NaN	NaN	NaN	NaN	NaN	NaN	NaN	NaN	NaN	NaN	25.8028	NaN	NaN
22	26.0766	26.0251	26.2569	26.1137	25.7417	25.5217	25.1855	24.301	23.9963	23.9791	23.368	22.8955	23.329	25.0119	26.523	NaN	NaN	26.732	26.8703	27.7716	27.5051	27.1451	26.9512	26.9896	26.486	26.0021	25.7952	25.5223	25.1726	24.6247	23.8748	23.0597	19.5902	NaN	NaN	NaN	NaN	NaN	NaN	NaN	NaN	NaN	NaN	NaN	NaN	NaN	NaN	NaN	26.2659
18	27.0856	26.8884	26.9159	26.5928	26.2358	25.8201	25.8658	25.5439	25.6124	25.6143	25.2422	25.5187	25.7622	26.4161	28.2765	NaN	NaN	NaN	NaN	27.7771	28.0294	NaN	27.6176	27.3777	26.9613	26.6688	26.2593	25.8554	25.5395	25.1213	24.5421	24.0448	21.9556	NaN	NaN	NaN	NaN	NaN	NaN	NaN	NaN	NaN	NaN	NaN	NaN	NaN	NaN	25.7853	26.4113
14	27.0707	26.8205	26.7065	26.8425	26.5559	26.4116	26.4645	26.4331	26.4686	26.4811	26.4326	26.5953	27.1816	27.8486	28.2502	28.3575	28.0585	NaN	NaN	27.9257	27.7784	27.3869	27.6197	27.658	27.5893	27.1844	26.7103	26.4162	26.1358	25.8107	25.5295	25.3449	23.8536	NaN	NaN	NaN	NaN	NaN	NaN	NaN	NaN	NaN	NaN	NaN	NaN	NaN	26.3469	26.2586	26.2291
10	27.6481	27.423	27.2372	27.2136	26.8407	26.8773	26.946	26.9203	27.0394	26.8521	26.8648	26.8065	27.2148	28.068	28.1468	28.1227	27.8674	27.5687	27.2532	NaN	27.8511	NaN	NaN	NaN	27.9274	27.7701	27.248	26.9231	26.894	26.8509	26.5875	26.4945	25.3839	NaN	NaN	NaN	NaN	NaN	NaN	NaN	NaN	NaN	NaN	NaN	NaN	NaN	26.3837	26.5985	26.6547
6	28.6398	28.5149	28.3946	27.8481	27.6729	27.8198	27.6887	27.8522	27.52	27.6364	27.3012	26.7264	27.1459	27.5411	28.1006	27.6482	27.9003	27.9846	27.8117	27.8236	NaN	NaN	NaN	NaN	NaN	NaN	27.3447	27.2972	27.2198	27.1534	27.1483	27.1895	27.0896	NaN	NaN	NaN	NaN	NaN	NaN	NaN	NaN	NaN	NaN	NaN	NaN	NaN	26.6458	27.1632	27.9701
2	28.3952	28.5569	28.402	27.5487	26.9887	26.9978	27.0399	27.0165	26.1544	26.5251	25.9956	25.4573	25.5286	26.0503	26.2938	25.8655	26.7502	27.6228	27.7418	27.4495	NaN	NaN	NaN	NaN	NaN	NaN	27.3061	27.1893	27.0949	27.0506	27.0587	27.303	26.8148	27.2449	26.8944	27.4153	27.7144	28.0566	NaN	NaN	NaN	NaN	NaN	NaN	NaN	26.5762	27.0836	27.786	28.5512
-2	28.3402	28.2774	28.0917	27.8777	27.2969	27.1757	27.1533	26.7399	25.5975	25.6738	24.9474	23.9339	24.6284	24.969	25.2148	24.4996	24.2748	25.376	25.9487	25.5263	NaN	NaN	NaN	NaN	NaN	NaN	NaN	NaN	27.2589	27.4022	26.9707	26.8393	26.1094	25.9368	26.0001	26.5062	26.7637	26.5303	NaN	NaN	NaN	NaN	NaN	NaN	NaN	27.0373	27.5423	28.1652	28.5385
-6	29.1478	28.9045	28.7611	28.8068	28.3646	28.4613	28.1874	27.7588	27.6023	27.1768	25.9659	25.3713	25.9417	25.7174	26.2036	25.2441	25.5296	26.388	26.1141	NaN	NaN	NaN	NaN	NaN	NaN	NaN	NaN	NaN	NaN	27.5927	27.3657	26.9358	26.4177	26.1734	26.0495	26.087	26.287	26.4512	NaN	NaN	NaN	NaN	NaN	NaN	27.1168	27.4516	27.6397	27.8611	27.7864
-10	29.0747	28.9262	28.859	28.8225	28.7666	28.8274	28.7934	28.5782	28.5077	28.0433	27.3968	26.7637	26.7326	26.5259	26.4775	25.5218	25.8679	26.0671	26.1676	25.7391	NaN	NaN	NaN	NaN	NaN	NaN	NaN	NaN	NaN	27.4707	27.1164	26.9678	26.8285	26.3028	25.6723	25.5347	25.6543	26.0085	25.1198	NaN	NaN	NaN	NaN	NaN	27.2902	27.2761	27.3549	27.5158	27.1936
-14	28.6035	28.4138	28.5143	28.4618	28.4102	28.4691	28.617	28.5534	28.1729	27.9609	27.9811	26.9546	26.5736	26.4531	26.0773	25.1898	25.6395	25.5756	25.6152	26.0167	24.0795	NaN	NaN	NaN	NaN	NaN	NaN	NaN	NaN	26.8468	26.4803	25.6373	25.9525	25.7822	25.1876	24.4406	24.1658	23.9132	NaN	NaN	NaN	NaN	NaN	NaN	27.4439	NaN	26.5528	26.8558	26.1499
-18	27.4739	27.5914	27.9615	27.443	27.4869	27.6195	27.6834	27.4126	27.5521	27.4387	26.8469	25.8919	25.7335	25.5609	25.2982	25.4373	25.2301	25.1346	24.4047	24.1617	25.1757	NaN	NaN	NaN	NaN	NaN	NaN	NaN	26.7947	26.6611	26.3657	24.7176	25.3031	25.1972	24.6984	24.4407	23.5409	22.3698	NaN	NaN	NaN	NaN	NaN	NaN	27.2486	NaN	25.0541	26.3095	25.3041
-22	26.2121	26.3059	25.8621	25.7208	26.0443	25.8822	25.9191	25.6948	26.5198	26.417	25.2246	24.5176	25.0168	25.2375	25.7655	25.6042	24.4792	24.3037	23.6853	22.3773	23.2304	24.38	NaN	NaN	NaN	NaN	NaN	NaN	26.4037	26.5396	26.3907	25.5863	25.2907	25.0437	24.0917	24.1197	23.2622	22.0085	18.8114	NaN	NaN	NaN	NaN	26.8781	27.0004	NaN	25.614	25.9159	25.4654
-26	24.6383	24.5493	23.9346	24.2232	24.4411	24.3201	23.8665	24.3479	24.7692	24.8355	24.8178	24.5323	25.0789	25.2505	24.9463	24.1928	24.0027	23.2211	23.1464	21.8792	21.607	22.5785	NaN	NaN	NaN	NaN	NaN	25.4023	26.0496	25.4421	25.0488	24.6833	24.7035	24.9072	23.9714	23.4984	22.9963	21.8856	19.1836	NaN	NaN	NaN	NaN	25.1131	25.3896	24.9861	25.4239	25.1774	25.0045
-30	22.9788	22.5766	22.7054	22.6474	23.5589	22.8489	22.3672	23.2294	23.611	23.4731	23.3145	23.7259	24.0786	23.7872	23.428	22.9717	23.3475	22.2261	21.8788	21.3022	20.2858	NaN	NaN	NaN	NaN	NaN	23.8967	24.2419	23.9727	23.6441	23.4195	22.9148	22.8421	23.4695	23.1079	22.5442	22.1851	21.6273	20.6963	NaN	NaN	NaN	NaN	24.0151	24.0474	23.8851	23.99	23.4596	23.4041
-34	21.1119	20.4429	20.3662	20.0376	20.3682	20.0519	20.251	20.7551	20.8944	20.7615	20.9781	21.1556	20.1679	21.2383	21.4629	21.1058	21.0244	21.241	20.781	20.2492	19.1176	NaN	NaN	NaN	NaN	21.265	22.7099	22.0653	21.94	21.7798	21.3683	21.3967	21.4608	21.3517	20.7715	20.2168	20.048	20.1417	20.7213	NaN	NaN	NaN	23.7861	22.2612	22.2667	22.1195	22.0555	21.849	21.4248
-38	19.4263	18.4985	18.3169	18.3639	18.0815	17.7791	17.7799	17.7356	18.0515	18.1801	17.9023	17.6375	17.2283	18.2607	18.513	17.9442	17.5932	18.1216	18.9053	18.7275	17.9388	NaN	NaN	NaN	NaN	19.8399	20.8147	19.1356	19.3639	19.3841	18.6917	17.8109	17.7744	18.1552	17.3298	16.9007	16.2676	15.6463	18.4678	20.8081	22.0332	20.721	21.1746	21.1686	20.9038	18.676	19.2771	20.0581	19.2099
-42	17.3062	17.1497	16.481	16.1138	15.8065	15.5151	15.6539	15.7959	16.1273	15.9596	15.2424	15.0943	14.8565	15.2309	14.4905	14.575	14.2441	14.4786	15.0414	16.2082	15.9317	NaN	NaN	16.6798	13.9864	17.1501	17.3276	15.2111	14.7522	15.4435	15.1668	13.7876	13.7416	14.5738	13.1448	12.9004	12.2135	12.6037	14.8194	15.8453	17.3136	15.9402	14.7633	15.4964	14.354	12.2973	13.9229	15.9742	15.622
-46	14.0481	14.6853	14.9734	14.9156	13.9395	13.4011	13.6258	13.8779	13.7807	13.3102	12.6202	12.4151	11.6315	11.4377	11.2042	11.8158	11.8216	11.4233	12.8159	14.9745	13.8278	NaN	NaN	12.8222	12.0212	14.042	14.1361	12.6065	11.2247	11.0846	10.5904	9.98306	9.64068	9.07185	8.27164	8.74933	8.85375	9.77997	9.65124	8.6848	9.1435	9.91296	9.83172	9.10445	8.15657	7.22207	7.84977	9.49381	9.29234
-50	12.0785	12.6105	12.6737	12.5965	12.5022	11.8844	12.0555	12.1541	11.5291	11.2579	10.6519	10.4278	10.0046	9.67214	10.273	10.7321	10.2387	9.27595	10.029	10.7744	12.0383	NaN	NaN	10.7801	10.0138	9.76035	9.18305	7.8563	6.96477	6.4477	6.37191	6.18821	6.10462	5.32282	4.80422	4.94187	5.17778	5.35937	5.0268	4.56675	4.86003	5.46715	5.54517	5.7667	5.22257	5.53728	6.19312	5.64255	5.64406
-54	10.2916	10.3908	10.349	9.47394	9.21778	8.5841	8.0562	8.0095	8.07178	8.1074	8.38502	8.58649	8.91589	9.74629	9.738	9.39849	8.68938	8.21373	8.18969	8.56751	9.76196	NaN	NaN	8.69495	8.45398	7.22557	5.73759	4.61095	3.99078	3.33401	3.45129	3.5393	3.67505	3.62626	3.07353	2.76294	2.62871	2.62293	2.50953	2.4589	2.91331	3.1821	3.12113	3.63215	3.61106	4.0282	4.40321	3.62661	3.78653
-58	7.46249	6.91476	6.27298	6.52926	5.51395	4.48693	4.11951	4.72352	5.23509	5.40668	5.70301	5.9251	6.15404	5.98019	6.37253	6.90522	6.74141	6.56091	7.29198	7.5609	7.48023	7.55461	6.67257	5.72882	5.11767	4.22176	3.5443	3.31864	2.88522	2.54508	2.53335	2.93219	2.80192	2.3254	1.98439	1.95756	1.89861	1.83555	2.17718	1.95941	2.6033	2.78776	2.66473	2.67955	3.1061	3.58379	3.36574	2.65072	2.73631
-62	4.95983	4.65937	4.01424	4.00317	3.29091	2.60311	2.61764	3.06489	3.56584	3.61251	3.92168	4.59402	4.50216	3.98208	4.20452	4.62753	4.61008	4.2502	4.41085	4.65607	4.26128	3.82796	3.09995	NaN	NaN	1.32104	1.81878	1.87857	1.21154	1.20701	1.53085	1.87397	1.71922	1.53477	1.64463	1.63659	1.48973	1.69402	1.833	2.39419	2.49725	2.44333	2.38538	2.51465	2.77205	2.78701	2.38931	2.22394	2.23889
-66	2.7662	2.94635	2.85415	2.93393	2.67107	2.01427	1.53103	1.39578	1.36147	1.48189	1.86378	2.31381	1.84335	1.79118	1.9903	1.96236	1.97629	1.86778	2.18447	2.28122	2.07538	1.86913	1.18683	NaN	-0.683698	-0.532429	-0.259432	0.35106	0.654042	0.97364	1.14633	1.52227	1.87672	1.76901	1.94234	1.85818	1.77736	2.04853	2.27109	2.32389	2.08637	1.73166	1.04451	1.21996	1.00098	0.466525	NaN	NaN	0.637106
-70	0.633288	0.721564	0.71162	0.895315	0.868765	0.668944	0.385851	0.433652	0.365484	0.242998	0.195953	0.33325	0.602772	0.609131	0.591836	0.457051	0.0102191	0.177861	0.53855	0.730619	0.585328	NaN	NaN	NaN	NaN	-1.70464	-1.31785	-0.414145	0.166725	0.582613	0.558741	0.458589	0.011826	NaN	NaN	NaN	NaN	NaN	NaN	NaN	NaN	NaN	NaN	NaN	NaN	NaN	NaN	NaN	NaN
-74	-0.183841	-0.324342	-0.404842	-0.390142	-0.366242	-0.20114	NaN	NaN	NaN	NaN	NaN	NaN	NaN	0.399054	1.59955	1.06025	NaN	NaN	NaN	NaN	NaN	NaN	NaN	NaN	-1.51366	-1.56696	-1.70856	-1.82406	-1.57661	-1.2665	NaN	NaN	NaN	NaN	NaN	NaN	NaN	NaN	NaN	NaN	NaN	NaN	NaN	NaN	NaN	NaN	NaN	NaN	NaN
-78	-0.962952	-1.08025	-1.18715	-1.29235	NaN	NaN	NaN	NaN	NaN	NaN	NaN	NaN	NaN	NaN	NaN	NaN	NaN	NaN	NaN	NaN	NaN	NaN	NaN	NaN	NaN	NaN	NaN	-1.63176	-1.88076	NaN	NaN	NaN	NaN	NaN	NaN	NaN	NaN	NaN	NaN	NaN	NaN	NaN	NaN	NaN	NaN	NaN	NaN	NaN	NaN
-82	NaN	NaN	NaN	NaN	NaN	NaN	NaN	NaN	NaN	NaN	NaN	NaN	NaN	NaN	NaN	NaN	NaN	NaN	NaN	NaN	NaN	NaN	NaN	NaN	NaN	NaN	NaN	NaN	NaN	NaN	NaN	NaN	NaN	NaN	NaN	NaN	NaN	NaN	NaN	NaN	NaN	NaN	NaN	NaN	NaN	NaN	NaN	NaN	NaN
-86	NaN	NaN	NaN	NaN	NaN	NaN	NaN	NaN	NaN	NaN	NaN	NaN	NaN	NaN	NaN	NaN	NaN	NaN	NaN	NaN	NaN	NaN	NaN	NaN	NaN	NaN	NaN	NaN	NaN	NaN	NaN	NaN	NaN	NaN	NaN	NaN	NaN	NaN	NaN	NaN	NaN	NaN	NaN	NaN	NaN	NaN	NaN	NaN	NaN
[truncated: 23 more columns]

## Sheet: 20.0 m
	-177.5	-172.5	-167.5	-162.5	-157.5	-152.5	-147.5	-142.5	-137.5	-132.5	-127.5	-122.5	-117.5	-112.5	-107.5	-102.5	-97.5	-92.5	-87.5	-82.5	-77.5	-72.5	-67.5	-62.5	-57.5	-52.5	-47.5	-42.5	-37.5	-32.5	-27.5	-22.5	-17.5	-12.5	-7.5	-2.5	2.5	7.5	12.5	17.5	22.5	27.5	32.5	37.5	42.5	47.5	52.5	57.5	62.5
86	-1.66126	-1.66456	-1.66466	-1.66366	-1.66256	-1.66126	-1.66086	-1.65926	-1.66046	-1.66246	-1.66746	-1.67286	-1.67866	-1.68306	-1.68546	-1.68486	-1.68246	-1.68546	-1.68956	-1.68556	-1.68006	-1.67276	-1.66316	-1.65266	-1.64326	-1.63626	-1.63196	-1.62776	-1.62806	-1.62936	-1.63526	-1.65066	-1.66246	-0.134393	1.02763	1.11855	1.27239	1.26179	1.21269	1.19679	1.12249	0.521471	0.135677	0.0621653	-1.13587	-1.24285	-1.42668	-1.38565	-1.33285
82	-1.31615	-1.29835	-1.27145	-1.23965	-1.21355	-1.19525	-1.18085	-1.17515	-1.18325	-1.20075	-1.22625	-1.24105	-1.24485	-1.23605	-1.19165	-1.15935	-1.03265	NaN	NaN	NaN	NaN	NaN	NaN	NaN	NaN	NaN	NaN	NaN	NaN	NaN	NaN	NaN	NaN	0.203873	3.39201	5.90286	7.91518	9.0097	8.86914	6.14124	3.52113	1.49872	0.733401	0.0543539	-1.02426	-1.71265	-1.65475	-1.48405	-1.29145
78	-1.30095	-1.21295	-1.24315	-1.32125	-1.39845	-1.44295	-1.44115	-1.37715	-1.22825	-1.03465	-0.943649	-0.960849	-1.05125	NaN	-1.35975	-1.51205	-1.64245	NaN	NaN	NaN	NaN	-0.626317	NaN	NaN	NaN	NaN	NaN	NaN	NaN	NaN	NaN	NaN	-2.23763	0.29914	4.32727	8.19286	10.9846	13.0323	NaN	NaN	NaN	4.60553	4.22446	2.54753	0.681206	0.624184	0.434222	0.249085	0.320673
74	-0.635924	-0.558163	-0.67689	-0.888405	-0.955847	-0.945047	-1.15765	-1.30315	-1.10137	-0.59651	-0.189347	NaN	NaN	NaN	NaN	-1.16895	NaN	NaN	NaN	NaN	NaN	0.500873	0.354964	0.143238	NaN	NaN	NaN	NaN	NaN	NaN	NaN	NaN	-0.491072	1.60026	6.62592	11.3655	12.8852	11.8937	9.88092	9.16989	8.41105	8.16449	7.58727	6.17614	4.02867	3.22394	3.07552	NaN	0.966227
70	0.961476	2.04637	2.43699	NaN	NaN	NaN	NaN	NaN	NaN	NaN	NaN	NaN	NaN	NaN	NaN	NaN	NaN	NaN	NaN	NaN	NaN	NaN	NaN	0.0433378	1.95811	NaN	NaN	NaN	NaN	NaN	NaN	NaN	3.3179	5.87422	9.84958	13.8265	14.7482	14.2472	12.7311	NaN	NaN	NaN	NaN	8.06227	5.63343	5.88584	5.85231	4.64811	NaN
66	NaN	NaN	NaN	NaN	NaN	NaN	NaN	NaN	NaN	NaN	NaN	NaN	NaN	NaN	NaN	NaN	NaN	NaN	NaN	NaN	NaN	NaN	NaN	0.168127	2.61358	NaN	NaN	NaN	NaN	5.81245	7.14062	NaN	NaN	11.0057	13.2755	15.6844	15.3569	14.2591	NaN	NaN	NaN	NaN	NaN	NaN	NaN	NaN	NaN	NaN	NaN
62	6.03869	5.68194	6.97287	NaN	NaN	NaN	NaN	NaN	NaN	NaN	NaN	NaN	NaN	NaN	NaN	NaN	NaN	NaN	NaN	NaN	NaN	NaN	NaN	2.67792	3.97847	3.95756	NaN	NaN	8.51207	10.4779	12.0514	13.4004	13.7039	15.1474	17.249	16.4005	14.9102	NaN	NaN	NaN	NaN	NaN	NaN	NaN	NaN	NaN	NaN	NaN	NaN
58	7.34136	6.45518	6.39409	NaN	NaN	8.63532	9.69487	10.1975	NaN	NaN	NaN	NaN	NaN	NaN	NaN	NaN	NaN	NaN	NaN	NaN	NaN	NaN	NaN	NaN	3.54074	5.4601	6.40102	7.47796	9.87021	12.1138	14.0363	15.3345	15.2835	17.3727	17.503	NaN	13.6537	NaN	NaN	NaN	NaN	NaN	NaN	NaN	NaN	NaN	NaN	NaN	NaN
54	7.32568	7.47057	7.68476	8.18653	8.84277	9.38389	9.76804	10.3818	10.8408	11.3056	NaN	NaN	NaN	NaN	NaN	NaN	NaN	NaN	NaN	NaN	NaN	NaN	NaN	NaN	NaN	4.9803	8.37868	10.1649	10.9067	12.8277	14.8465	16.3036	16.6905	18.3978	NaN	NaN	13.2097	NaN	NaN	NaN	NaN	NaN	NaN	NaN	NaN	NaN	NaN	NaN	NaN
50	8.22722	8.44154	8.3156	8.71732	9.28147	10.2037	10.4823	11.2611	12.1075	12.4635	NaN	NaN	NaN	NaN	NaN	NaN	NaN	NaN	NaN	NaN	NaN	NaN	NaN	NaN	NaN	5.12383	8.54924	13.2817	15.0084	15.424	16.4469	17.3111	17.7686	18.8946	19.3219	NaN	NaN	NaN	NaN	NaN	NaN	NaN	NaN	NaN	NaN	NaN	NaN	NaN	NaN
46	11.4165	11.0044	11.0519	11.3644	12.0904	12.6722	12.7771	13.2119	13.6867	13.6641	13.6868	NaN	NaN	NaN	NaN	NaN	NaN	NaN	NaN	NaN	NaN	NaN	NaN	7.25286	8.44526	7.22601	9.82344	16.62	18.4648	18.3154	18.85	18.9192	18.7751	18.8052	18.5935	NaN	NaN	NaN	NaN	NaN	NaN	NaN	NaN	NaN	NaN	NaN	NaN	NaN	NaN
42	15.7398	15.4164	15.2028	15.1496	15.4573	15.6067	15.9388	16.166	16.0073	15.508	14.607	NaN	NaN	NaN	NaN	NaN	NaN	NaN	NaN	NaN	NaN	NaN	12.371	14.3955	16.7821	16.2699	17.7457	21.388	20.7364	20.4363	20.075	19.9804	19.2232	19.0318	NaN	NaN	NaN	19.2581	NaN	NaN	NaN	NaN	NaN	NaN	NaN	NaN	NaN	NaN	NaN
38	19.0458	18.4675	18.1176	18.2295	18.4824	18.4036	18.5448	18.2432	18.1681	17.5761	15.9611	NaN	NaN	NaN	NaN	NaN	NaN	NaN	NaN	NaN	NaN	19.4997	22.3327	23.7877	24.042	23.6989	23.1722	22.8865	21.9559	21.4325	20.6957	20.9756	20.602	20.2297	NaN	NaN	20.5349	20.4957	20.4829	20.8179	NaN	NaN	NaN	NaN	NaN	NaN	NaN	NaN	NaN
34	20.4984	20.1868	19.9543	20.0799	20.4898	20.4259	20.6612	20.6212	20.1068	19.2874	17.9303	16.4677	NaN	NaN	NaN	NaN	NaN	NaN	NaN	NaN	NaN	24.6131	24.2468	24.0857	23.8544	23.2275	23.2189	23.0083	22.9043	22.5002	21.917	21.6433	21.3905	20.8213	NaN	NaN	NaN	NaN	NaN	21.8985	21.5194	21.5925	22.7145	NaN	NaN	NaN	NaN	NaN	NaN
30	22.9789	22.924	22.4626	22.6127	23.1698	22.9644	22.7088	22.3384	21.6118	20.769	19.8247	19.0589	18.7917	NaN	NaN	NaN	NaN	NaN	NaN	NaN	25.4611	24.6858	24.1123	24.1614	24.0897	23.9545	23.7843	23.4726	23.5928	23.4495	23.0567	22.4305	22.0616	20.9692	NaN	NaN	NaN	NaN	NaN	NaN	NaN	NaN	NaN	NaN	NaN	NaN	NaN	NaN	NaN
26	25.2145	25.2136	25.0478	24.8354	24.9274	24.639	24.1561	23.4577	22.7969	22.0318	21.5954	21.23	20.9896	NaN	NaN	NaN	NaN	25.3055	26.3278	25.0939	26.4658	25.8922	25.9006	26.0557	25.7502	25.2936	25.0551	24.7632	24.5823	23.9159	23.3814	22.9459	21.5156	NaN	NaN	NaN	NaN	NaN	NaN	NaN	NaN	NaN	NaN	NaN	NaN	NaN	25.8985	NaN	NaN
22	26.0944	26.0352	26.2223	26.0798	25.6886	25.4672	25.1136	24.2828	23.9443	23.8847	23.2721	22.7849	23.289	24.9252	26.3304	NaN	NaN	26.6589	26.6105	27.7931	27.4744	27.1428	26.981	27.007	26.5212	26.0439	25.784	25.5181	25.1349	24.5712	23.8613	23.0662	19.3944	NaN	NaN	NaN	NaN	NaN	NaN	NaN	NaN	NaN	NaN	NaN	NaN	NaN	NaN	NaN	26.2468
18	27.0708	26.8942	26.9028	26.5615	26.2022	25.8084	25.79	25.5311	25.5281	25.5238	25.1427	25.3369	25.6791	26.3872	28.1397	NaN	NaN	NaN	NaN	27.8175	28.0451	NaN	27.6297	27.3974	27.0097	26.6938	26.2876	25.8649	25.517	25.1157	24.5496	24.0072	21.7054	NaN	NaN	NaN	NaN	NaN	NaN	NaN	NaN	NaN	NaN	NaN	NaN	NaN	NaN	25.7026	26.4367
14	27.0903	26.8302	26.7128	26.8254	26.5292	26.4117	26.3976	26.3611	26.4083	26.3678	26.301	26.347	27.1195	27.8187	28.198	28.2484	27.2286	NaN	NaN	27.9547	27.7793	27.4593	27.6375	27.6454	27.5959	27.2019	26.7535	26.4255	26.1225	25.8249	25.5398	25.1806	23.571	NaN	NaN	NaN	NaN	NaN	NaN	NaN	NaN	NaN	NaN	NaN	NaN	NaN	26.0067	26.2038	26.2492
10	27.662	27.4051	27.2446	27.228	26.8548	26.8807	26.9041	26.8337	27.0028	26.7175	26.6592	26.6774	27.1716	27.9811	27.9746	27.744	26.8106	24.936	25.0261	NaN	27.787	NaN	NaN	NaN	27.9031	27.7345	27.2606	26.8916	26.8617	26.8355	26.5541	26.3786	25.0904	NaN	NaN	NaN	NaN	NaN	NaN	NaN	NaN	NaN	NaN	NaN	NaN	NaN	26.2602	26.5716	26.6428
6	28.6288	28.4841	28.3739	27.8744	27.7004	27.8195	27.6645	27.8203	27.5388	27.6738	27.362	26.7847	27.1339	27.5066	27.9381	27.4178	27.6172	26.6748	26.8142	27.6899	NaN	NaN	NaN	NaN	NaN	NaN	27.3134	27.2768	27.1747	27.1661	27.1461	27.2122	27.1386	NaN	NaN	NaN	NaN	NaN	NaN	NaN	NaN	NaN	NaN	NaN	NaN	NaN	26.5809	27.0452	27.9182
2	28.2797	28.4762	28.3107	27.5237	26.9829	26.9486	26.9655	26.8993	26.0854	26.5473	25.9492	25.3614	25.3645	25.8613	26.0865	25.4893	26.3115	27.0838	27.4791	27.1842	NaN	NaN	NaN	NaN	NaN	NaN	27.1805	27.1881	27.1013	27.0467	26.9999	27.3016	26.7924	27.1958	26.534	27.197	27.3751	27.4253	NaN	NaN	NaN	NaN	NaN	NaN	NaN	26.497	26.8281	27.4887	28.3887
-2	28.3128	28.2637	28.0331	27.8631	27.2851	27.0953	27.0175	26.6709	25.5779	25.6402	24.9742	23.9364	24.4672	24.756	24.9567	24.0188	23.6134	24.3301	25.0718	24.4763	NaN	NaN	NaN	NaN	NaN	NaN	NaN	NaN	27.2118	27.3181	26.8918	26.7426	25.9818	25.7636	25.8297	26.3706	26.2563	25.1877	NaN	NaN	NaN	NaN	NaN	NaN	NaN	26.9319	27.2804	27.7937	28.2354
-6	29.1363	28.919	28.7499	28.8034	28.3918	28.4353	28.0601	27.8036	27.5865	27.104	25.9931	25.3624	25.8507	25.5955	26.0836	25.1357	25.3093	26.0421	25.6813	NaN	NaN	NaN	NaN	NaN	NaN	NaN	NaN	NaN	NaN	27.5095	27.2869	26.8536	26.3014	26.0058	25.9291	25.9007	25.8923	24.3054	NaN	NaN	NaN	NaN	NaN	NaN	26.9851	27.1862	27.3268	27.4721	27.5024
-10	29.079	28.9114	28.832	28.798	28.7916	28.7872	28.7163	28.5432	28.4144	27.948	27.3695	26.7089	26.633	26.3901	26.3221	25.3613	25.6355	25.7381	25.7945	25.1395	NaN	NaN	NaN	NaN	NaN	NaN	NaN	NaN	NaN	27.3885	27.0117	26.8721	26.6861	26.1444	25.5228	25.2924	25.3915	24.4645	22.6197	NaN	NaN	NaN	NaN	NaN	27.1235	26.997	27.1747	27.399	26.8443
-14	28.5268	28.3508	28.4427	28.3746	28.3338	28.423	28.5108	28.4556	28.1	27.8636	27.8915	26.8622	26.6983	26.3469	25.8928	25.0289	25.3786	25.249	25.2437	25.5727	23.2517	NaN	NaN	NaN	NaN	NaN	NaN	NaN	NaN	26.7573	26.3841	25.5161	25.8028	25.5342	24.9327	24.1847	23.8982	23.2159	NaN	NaN	NaN	NaN	NaN	NaN	27.2797	NaN	26.5261	26.6971	26.162
-18	27.3224	27.4667	27.7846	27.2868	27.3872	27.4927	27.538	27.3245	27.4411	27.2995	26.6677	25.7965	26.3767	25.6988	25.0846	25.2343	24.948	24.8471	24.0711	23.7921	24.6036	NaN	NaN	NaN	NaN	NaN	NaN	NaN	26.6671	26.5433	26.2158	24.5347	25.1176	24.9403	24.4159	24.1484	23.2574	22.0246	NaN	NaN	NaN	NaN	NaN	NaN	26.9062	NaN	25.1519	26.2265	25.5989
-22	26.0012	26.0359	25.6165	25.5568	25.9439	25.752	25.8746	25.7632	26.2007	25.8293	24.6699	24.4068	24.9501	25.0871	25.533	25.3901	24.2657	24.0735	23.3851	22.0484	22.8663	23.1294	NaN	NaN	NaN	NaN	NaN	NaN	26.2114	26.3861	26.1342	25.2798	24.9257	24.5606	23.8081	23.8084	22.9761	21.7485	18.3218	NaN	NaN	NaN	NaN	26.7137	26.6854	NaN	25.5815	25.6667	25.1725
-26	24.3837	24.2097	23.6721	23.9795	24.1987	24.2093	23.7991	24.2142	24.4456	24.4148	24.5216	24.3459	24.8244	24.9748	24.6588	24.0015	23.786	22.9736	22.8209	21.5631	21.313	21.9838	NaN	NaN	NaN	NaN	NaN	24.9865	25.8177	25.227	24.7705	24.4156	24.3147	24.1768	23.3846	22.9989	22.649	21.6112	18.8356	NaN	NaN	NaN	NaN	24.9049	25.1977	24.8392	25.1589	24.8841	24.6257
-30	22.6832	22.2812	22.4016	22.3139	23.2435	22.6592	22.2547	22.9889	23.4393	23.2662	23.0804	23.392	23.7874	23.3694	23.017	22.6739	23.003	21.9666	21.4634	20.9003	20.0161	NaN	NaN	NaN	NaN	NaN	23.6861	23.9987	23.7114	23.373	23.1652	22.6385	22.4852	22.7369	22.105	21.7559	21.7772	21.3155	20.3883	NaN	NaN	NaN	NaN	23.7014	23.7871	23.5861	23.5822	23.047	23.0412
-34	20.7881	20.1148	20.0216	19.7124	19.9722	19.743	19.9225	20.4522	20.6741	20.5386	20.6954	20.8369	19.9565	20.9201	21.0526	20.5587	20.4857	20.8051	20.2943	19.7905	18.7929	NaN	NaN	NaN	NaN	20.4499	22.3767	21.7197	21.6041	21.497	21.1213	21.1037	21.1632	21.0626	20.3235	19.8465	19.7897	19.8301	20.4224	NaN	NaN	NaN	23.5508	21.7366	21.8476	21.841	21.5964	21.2513	21.0737
-38	19.1024	18.1337	17.9511	18.0177	17.7013	17.4751	17.4594	17.4652	17.827	17.9733	17.6908	17.4075	16.9902	17.9356	18.0445	17.533	17.1706	17.6723	18.4573	18.2819	17.4615	NaN	NaN	NaN	NaN	19.0538	20.464	18.7897	19.0765	19.1255	18.4343	17.585	17.5412	17.8954	17.0697	16.6743	16.0586	15.4097	18.135	20.4622	21.6381	20.5955	20.9969	20.7557	20.4788	18.3893	18.9692	19.6392	19.1292
-42	16.9984	16.7906	16.2116	15.8137	15.3974	15.1593	15.389	15.5303	15.8541	15.7545	15.011	14.9368	14.7893	14.9687	14.2557	14.3824	13.9773	14.1579	14.7939	15.9194	15.5681	NaN	NaN	15.8799	13.0883	16.5726	16.9425	14.8429	14.4888	15.2175	14.9612	13.6029	13.5306	14.3809	12.9631	12.7172	12.0402	12.3036	14.4494	15.6289	17.0654	15.8045	14.5616	15.0617	13.8233	11.9713	13.6191	15.7185	15.5147
-46	13.7496	14.4237	14.7494	14.6609	13.6554	13.1756	13.4232	13.6283	13.563	13.1137	12.3865	12.2384	11.7755	11.2932	11.0452	11.6359	11.6031	11.1218	12.5352	14.7732	13.5897	NaN	NaN	12.1831	11.5499	13.6985	13.7944	12.2293	10.9484	10.8812	10.3961	9.79199	9.44995	8.89604	8.07826	8.54468	8.72237	9.55149	9.27776	8.52033	8.98217	9.7622	9.66745	8.86731	7.84628	6.96362	7.58545	9.23608	9.10875
-50	11.7798	12.388	12.4366	12.3988	12.3163	11.7039	11.8492	11.8697	11.2269	11.0364	10.5867	10.7265	10.1616	9.51655	10.0957	10.4972	10.0097	9.07264	9.82799	10.4447	11.5954	NaN	NaN	10.2567	9.6721	9.49683	8.90446	7.53129	6.66833	6.2121	6.20774	6.05679	5.98739	5.18201	4.63231	4.81212	5.06154	5.19872	4.70889	4.37883	4.69785	5.29152	5.36787	5.57097	5.00993	5.31136	5.98083	5.46766	5.58479
-54	10.0631	10.1891	10.0407	9.23742	9.04162	8.39195	7.84655	7.78714	7.799	7.88242	8.21912	8.48653	8.79322	9.53956	9.44724	9.06084	8.42489	8.04306	8.06542	8.48788	9.46029	NaN	NaN	8.40022	8.1833	6.95273	5.5039	4.38232	3.75187	3.10863	3.24916	3.39204	3.52982	3.48725	2.88189	2.60191	2.43149	2.37692	2.22934	2.23691	2.71602	2.98688	2.92751	3.41252	3.36964	3.80799	4.24048	3.45717	3.70487
-58	7.29509	6.82256	5.95281	6.19751	5.32259	4.28314	3.87726	4.44547	4.96285	5.17864	5.4648	5.71487	5.8927	5.70775	6.12439	6.72767	6.60915	6.42195	7.16593	7.47894	7.29488	7.32137	6.45248	5.48446	4.85681	3.92927	3.30906	3.11423	2.68563	2.33765	2.30044	2.68645	2.58358	2.13944	1.75121	1.77383	1.71813	1.60562	1.87382	1.63023	2.32378	2.50153	2.3462	2.36357	2.74783	3.25171	3.12933	2.44004	2.53876
-62	4.70539	4.44894	3.8173	3.72394	3.0279	2.3149	2.32328	2.79079	3.30323	3.36961	3.7061	4.35763	4.19165	3.70567	3.99448	4.4343	4.41759	4.07781	4.26492	4.50945	4.10465	3.63502	2.87864	NaN	NaN	1.16699	1.63391	1.67001	1.03135	1.04493	1.35464	1.64404	1.4816	1.28375	1.38054	1.49469	1.40426	1.56488	1.60531	2.06555	2.213	2.16695	2.10168	2.25802	2.50522	2.50431	2.15033	2.00898	2.00858
-66	2.52307	2.74233	2.65349	2.66456	2.36692	1.68674	1.25318	1.17674	1.16796	1.30315	1.73104	2.14812	1.56825	1.50346	1.73614	1.73943	1.77982	1.71695	2.04917	2.13343	1.8895	1.62885	0.951572	NaN	-0.843013	-0.626233	-0.344523	0.194649	0.509432	0.894607	1.09994	1.27261	1.54988	1.58293	1.83645	1.66808	1.54339	1.86894	2.17221	2.14642	1.8873	1.55486	0.870319	1.02826	0.827684	0.33495	NaN	NaN	0.456044
-70	0.463806	0.575121	0.550501	0.647671	0.626768	0.548345	0.374782	0.389633	0.262564	0.170539	0.236321	0.449771	0.654878	0.532115	0.446941	0.305118	-0.0451798	0.265462	0.658269	0.744418	0.446601	NaN	NaN	NaN	NaN	-1.71316	-1.3471	-0.458343	0.331127	0.630037	0.513594	0.352064	0.125278	NaN	NaN	NaN	NaN	NaN	NaN	NaN	NaN	NaN	NaN	NaN	NaN	NaN	NaN	NaN	NaN
-74	-0.265189	-0.38494	-0.46994	-0.48184	-0.44954	-0.251038	NaN	NaN	NaN	NaN	NaN	NaN	NaN	0.152606	1.67581	0.854606	NaN	NaN	NaN	NaN	NaN	NaN	NaN	NaN	-1.56246	-1.57226	-1.68456	-1.75886	-1.52971	-1.27354	NaN	NaN	NaN	NaN	NaN	NaN	NaN	NaN	NaN	NaN	NaN	NaN	NaN	NaN	NaN	NaN	NaN	NaN	NaN
-78	-1.0224	-1.1239	-1.2234	-1.3186	NaN	NaN	NaN	NaN	NaN	NaN	NaN	NaN	NaN	NaN	NaN	NaN	NaN	NaN	NaN	NaN	NaN	NaN	NaN	NaN	NaN	NaN	NaN	-1.63216	-1.82496	NaN	NaN	NaN	NaN	NaN	NaN	NaN	NaN	NaN	NaN	NaN	NaN	NaN	NaN	NaN	NaN	NaN	NaN	NaN	NaN
-82	NaN	NaN	NaN	NaN	NaN	NaN	NaN	NaN	NaN	NaN	NaN	NaN	NaN	NaN	NaN	NaN	NaN	NaN	NaN	NaN	NaN	NaN	NaN	NaN	NaN	NaN	NaN	NaN	NaN	NaN	NaN	NaN	NaN	NaN	NaN	NaN	NaN	NaN	NaN	NaN	NaN	NaN	NaN	NaN	NaN	NaN	NaN	NaN	NaN
-86	NaN	NaN	NaN	NaN	NaN	NaN	NaN	NaN	NaN	NaN	NaN	NaN	NaN	NaN	NaN	NaN	NaN	NaN	NaN	NaN	NaN	NaN	NaN	NaN	NaN	NaN	NaN	NaN	NaN	NaN	NaN	NaN	NaN	NaN	NaN	NaN	NaN	NaN	NaN	NaN	NaN	NaN	NaN	NaN	NaN	NaN	NaN	NaN	NaN
[truncated: 23 more columns]

## Sheet: 30.0 m
	-177.5	-172.5	-167.5	-162.5	-157.5	-152.5	-147.5	-142.5	-137.5	-132.5	-127.5	-122.5	-117.5	-112.5	-107.5	-102.5	-97.5	-92.5	-87.5	-82.5	-77.5	-72.5	-67.5	-62.5	-57.5	-52.5	-47.5	-42.5	-37.5	-32.5	-27.5	-22.5	-17.5	-12.5	-7.5	-2.5	2.5	7.5	12.5	17.5	22.5	27.5	32.5	37.5	42.5	47.5	52.5	57.5	62.5
86	-1.66303	-1.66733	-1.66893	-1.66983	-1.67023	-1.66853	-1.66703	-1.66393	-1.66233	-1.66203	-1.66503	-1.66973	-1.67563	-1.68083	-1.68393	-1.68443	-1.68343	-1.68683	-1.69213	-1.69183	-1.68683	-1.67953	-1.67003	-1.65803	-1.64343	-1.63113	-1.62223	-1.61353	-1.60113	-1.59593	-1.61093	-1.64103	-1.65203	-0.190642	0.920497	1.01036	1.15996	1.15206	1.10406	1.10366	1.06476	0.523037	0.206396	0.199565	-0.889816	-0.915491	-1.03269	-1.04484	-1.01774
82	-1.28594	-1.27474	-1.25544	-1.23534	-1.21984	-1.21144	-1.20224	-1.19324	-1.19084	-1.19584	-1.21054	-1.22434	-1.23304	-1.23164	-1.19424	-1.16634	-1.03034	NaN	NaN	NaN	NaN	NaN	NaN	NaN	NaN	NaN	NaN	NaN	NaN	NaN	NaN	NaN	NaN	0.175249	3.23794	5.66852	7.61208	8.6679	8.57039	5.97187	3.46888	1.5205	0.794495	0.151418	-0.856297	-1.45459	-1.33649	-1.09061	-0.889314
78	-1.24554	-1.18864	-1.23684	-1.32154	-1.41374	-1.47864	-1.50244	-1.46014	-1.33894	-1.17574	-1.07174	-1.04044	-1.17194	NaN	-1.28474	-1.44224	-1.35684	NaN	NaN	NaN	NaN	-0.432973	NaN	NaN	NaN	NaN	NaN	NaN	NaN	NaN	NaN	NaN	-2.21441	0.300143	4.16676	7.89738	10.6312	12.6546	NaN	NaN	NaN	4.44776	3.99135	2.31641	0.534278	0.582436	0.57112	0.483116	0.450849
74	-0.348452	-0.37508	-0.639015	-0.920373	-0.977914	-0.928514	-1.15371	-1.40831	-1.38589	-1.05206	-0.612314	NaN	NaN	NaN	NaN	-0.906138	NaN	NaN	NaN	NaN	NaN	0.169958	0.0330793	-0.0995919	NaN	NaN	NaN	NaN	NaN	NaN	NaN	NaN	-0.39456	1.5743	6.36268	10.8855	12.3862	11.5249	9.66641	9.00874	8.25552	7.97702	7.35202	5.92462	3.85301	3.14455	3.0892	NaN	0.847121
70	1.22697	2.23763	2.4008	NaN	NaN	NaN	NaN	NaN	NaN	NaN	NaN	NaN	NaN	NaN	NaN	NaN	NaN	NaN	NaN	NaN	NaN	NaN	NaN	-0.460676	1.60064	NaN	NaN	NaN	NaN	NaN	NaN	NaN	3.18273	5.64009	9.49432	13.3767	14.3104	13.8622	12.5045	NaN	NaN	NaN	NaN	7.86378	5.46601	5.66323	5.43943	4.28134	NaN
66	NaN	NaN	NaN	NaN	NaN	NaN	NaN	NaN	NaN	NaN	NaN	NaN	NaN	NaN	NaN	NaN	NaN	NaN	NaN	NaN	NaN	NaN	NaN	-0.804745	2.52277	NaN	NaN	NaN	NaN	5.87455	7.06032	NaN	NaN	10.7623	12.8408	15.2303	15.0094	13.9808	NaN	NaN	NaN	NaN	NaN	NaN	NaN	NaN	NaN	NaN	NaN
62	5.26447	4.13618	NaN	NaN	NaN	NaN	NaN	NaN	NaN	NaN	NaN	NaN	NaN	NaN	NaN	NaN	NaN	NaN	NaN	NaN	NaN	NaN	NaN	2.50047	3.97746	4.10293	NaN	NaN	8.75517	10.7767	12.0146	13.2034	13.5401	14.8885	16.8777	16.0345	14.6825	NaN	NaN	NaN	NaN	NaN	NaN	NaN	NaN	NaN	NaN	NaN	NaN
58	7.07305	6.21209	5.91548	NaN	NaN	8.48796	9.56965	10.1218	NaN	NaN	NaN	NaN	NaN	NaN	NaN	NaN	NaN	NaN	NaN	NaN	NaN	NaN	NaN	NaN	3.51461	5.39239	6.32038	7.42111	10.3433	13.3873	14.4375	15.1807	15.0712	17.0933	17.2915	NaN	13.4354	NaN	NaN	NaN	NaN	NaN	NaN	NaN	NaN	NaN	NaN	NaN	NaN
54	7.18921	7.34918	7.56382	8.10553	8.72452	9.20085	9.58978	10.2716	10.7759	11.3371	NaN	NaN	NaN	NaN	NaN	NaN	NaN	NaN	NaN	NaN	NaN	NaN	NaN	NaN	NaN	4.86776	8.23206	9.99082	10.7874	12.8644	14.7727	16.1368	16.437	18.0938	NaN	NaN	13.2092	NaN	NaN	NaN	NaN	NaN	NaN	NaN	NaN	NaN	NaN	NaN	NaN
50	8.54101	8.38525	8.18791	8.6263	9.23321	10.1004	10.3809	11.1343	11.9354	12.3077	NaN	NaN	NaN	NaN	NaN	NaN	NaN	NaN	NaN	NaN	NaN	NaN	NaN	NaN	NaN	4.82673	8.33713	13.1328	14.8495	15.2604	16.281	17.1304	17.5345	18.6063	18.9403	NaN	NaN	NaN	NaN	NaN	NaN	NaN	NaN	NaN	NaN	NaN	NaN	NaN	NaN
46	12.3925	11.1973	10.9394	11.3664	12.1034	12.4283	12.6018	13.0549	13.4995	13.5324	13.4754	NaN	NaN	NaN	NaN	NaN	NaN	NaN	NaN	NaN	NaN	NaN	NaN	6.57762	8.27593	6.8877	9.47306	16.5038	18.399	18.2935	18.6781	18.7042	18.5467	18.612	18.3615	NaN	NaN	NaN	NaN	NaN	NaN	NaN	NaN	NaN	NaN	NaN	NaN	NaN	NaN
42	15.6076	15.261	15.0255	14.9578	15.2937	15.3943	15.7097	15.9813	15.8408	15.4332	14.4109	NaN	NaN	NaN	NaN	NaN	NaN	NaN	NaN	NaN	NaN	NaN	12.3786	14.4438	16.8909	16.3338	17.6292	21.3378	20.6077	20.3076	19.8888	19.7678	19.0504	18.885	NaN	NaN	NaN	19.0692	NaN	NaN	NaN	NaN	NaN	NaN	NaN	NaN	NaN	NaN	NaN
38	18.8989	18.3297	17.9804	17.9752	18.2751	18.2115	18.3233	18.1065	18.0759	17.5243	15.8509	NaN	NaN	NaN	NaN	NaN	NaN	NaN	NaN	NaN	NaN	19.3761	22.304	23.7515	23.9946	23.6705	23.1335	22.7649	21.8174	21.2951	20.5763	20.8198	20.4412	20.0831	NaN	NaN	20.2201	20.3376	20.0759	20.6089	NaN	NaN	NaN	NaN	NaN	NaN	NaN	NaN	NaN
34	20.4253	20.069	19.8421	19.9124	20.3501	20.3442	20.5736	20.5544	20.0406	19.2409	17.8704	16.2035	NaN	NaN	NaN	NaN	NaN	NaN	NaN	NaN	NaN	24.5605	24.1904	24.005	23.7569	23.1675	23.1342	22.9061	22.7869	22.4187	21.8666	21.6002	21.3039	20.7791	NaN	NaN	NaN	NaN	NaN	21.8018	21.298	21.4195	22.5047	NaN	NaN	NaN	NaN	NaN	NaN
30	22.8782	22.7809	22.3512	22.5798	23.0985	22.8471	22.6229	22.2981	21.5705	20.7181	19.8029	19.0227	18.4212	NaN	NaN	NaN	NaN	NaN	NaN	NaN	25.4365	24.6011	24.0435	24.0995	24.0187	23.9048	23.7303	23.4316	23.5526	23.4281	23.0062	22.3928	21.9871	20.8507	NaN	NaN	NaN	NaN	NaN	NaN	NaN	NaN	NaN	NaN	NaN	NaN	NaN	NaN	NaN
26	25.1675	25.1302	24.9858	24.8409	24.8794	24.5487	24.1052	23.4131	22.7627	21.9624	21.5459	21.1946	20.8029	NaN	NaN	NaN	NaN	25.2953	26.2284	25.2318	26.4897	25.8484	25.8725	26.0192	25.6978	25.2832	25.0321	24.7533	24.5553	23.9103	23.3767	22.9342	21.4397	NaN	NaN	NaN	NaN	NaN	NaN	NaN	NaN	NaN	NaN	NaN	NaN	NaN	25.316	NaN	NaN
22	26.0858	26.0154	26.2003	26.0652	25.6508	25.4241	25.0549	24.206	23.8806	23.76	23.1482	22.7271	23.1602	24.6524	25.8619	NaN	NaN	26.4638	26.3072	27.759	27.4263	27.0999	26.9876	27.0298	26.5712	26.0918	25.76	25.5011	25.1068	24.532	23.8629	23.0817	19.1675	NaN	NaN	NaN	NaN	NaN	NaN	NaN	NaN	NaN	NaN	NaN	NaN	NaN	NaN	NaN	26.0164
18	27.0647	26.9041	26.8855	26.568	26.1793	25.7865	25.6909	25.4574	25.4971	25.4877	25.0865	25.2086	25.5287	26.2306	27.6736	NaN	NaN	NaN	NaN	27.8327	28.0519	NaN	27.6515	27.4361	27.0634	26.7095	26.2809	25.8617	25.5074	25.0906	24.5651	23.8697	21.0172	NaN	NaN	NaN	NaN	NaN	NaN	NaN	NaN	NaN	NaN	NaN	NaN	NaN	NaN	25.3732	26.3844
14	27.0961	26.8684	26.713	26.8187	26.5005	26.3603	26.2508	26.1462	26.0812	26.0486	25.676	25.6663	26.8803	27.5453	27.8546	27.7551	25.7022	NaN	NaN	27.9139	27.7395	27.4192	27.591	27.5977	27.6087	27.2407	26.7954	26.4163	26.061	25.6441	25.4536	24.3349	22.2708	NaN	NaN	NaN	NaN	NaN	NaN	NaN	NaN	NaN	NaN	NaN	NaN	NaN	25.422	25.9913	26.1576
10	27.664	27.4191	27.2184	27.1621	26.8111	26.7673	26.5967	26.0994	26.2656	26.0821	25.5114	25.9235	26.9837	27.476	27.0763	25.8768	23.7505	21.4054	22.5315	NaN	27.604	NaN	NaN	NaN	27.8408	27.688	27.2374	26.7435	26.6309	26.4627	26.3893	25.4176	23.7583	NaN	NaN	NaN	NaN	NaN	NaN	NaN	NaN	NaN	NaN	NaN	NaN	NaN	25.9414	26.4212	26.5213
6	28.5987	28.451	28.3247	27.8558	27.6695	27.7656	27.6198	27.7299	27.423	27.73	27.4006	26.8231	27.0829	27.3035	27.6403	26.5365	26.3751	25.1058	25.6201	27.0042	NaN	NaN	NaN	NaN	NaN	NaN	27.2492	27.1573	27.0291	27.144	27.1748	26.9975	26.6019	NaN	NaN	NaN	NaN	NaN	NaN	NaN	NaN	NaN	NaN	NaN	NaN	NaN	26.2957	26.633	27.6936
2	28.2345	28.4458	28.2189	27.4778	26.9494	26.9022	26.9247	26.8508	26.0006	26.4398	25.9072	25.2184	25.126	25.5752	25.8753	25.069	25.6556	26.4013	26.663	26.3921	NaN	NaN	NaN	NaN	NaN	NaN	27.1071	27.176	27.1066	27.0392	26.9361	27.2583	26.6926	26.9865	25.9684	26.5514	26.3256	24.8683	NaN	NaN	NaN	NaN	NaN	NaN	NaN	26.2389	26.2839	26.6638	27.9489
-2	28.3446	28.1945	27.9739	27.7923	27.2978	27.1204	26.9863	26.6217	25.6037	25.5729	25.0823	23.9708	24.3079	24.5158	24.6734	23.4444	22.8513	23.3041	23.5691	22.8407	NaN	NaN	NaN	NaN	NaN	NaN	NaN	NaN	27.1778	27.2541	26.7977	26.6838	25.8043	25.4374	25.3802	25.7567	24.8125	23.3845	NaN	NaN	NaN	NaN	NaN	NaN	NaN	26.6454	26.7863	26.7628	27.347
-6	29.1769	28.8854	28.7364	28.7908	28.3113	28.3302	28.0016	27.7449	27.4994	27.2187	26.008	25.3225	25.7841	25.5143	26.0081	24.9639	25.0632	25.7109	25.0954	NaN	NaN	NaN	NaN	NaN	NaN	NaN	NaN	NaN	NaN	27.4573	27.1996	26.8069	26.2295	25.8925	25.7674	25.492	24.6495	21.3234	NaN	NaN	NaN	NaN	NaN	NaN	26.7416	26.6041	26.5052	26.136	26.4406
-10	29.0642	28.8985	28.8268	28.7861	28.7315	28.6603	28.6643	28.4704	28.3307	27.8864	27.2739	26.6186	26.5214	26.2746	26.283	25.2253	25.4488	25.5455	25.4108	24.3269	NaN	NaN	NaN	NaN	NaN	NaN	NaN	NaN	NaN	27.3168	26.9212	26.7751	26.555	25.9865	25.3498	25.0679	24.7104	21.4579	19.7584	NaN	NaN	NaN	NaN	NaN	26.8097	26.5171	26.6633	26.7615	26.139
-14	28.4423	28.2959	28.384	28.3263	28.2687	28.2818	28.3727	28.3203	28.021	27.7378	27.7369	26.7746	26.5787	26.2671	25.7775	24.9077	25.1884	24.9865	24.9092	24.9361	22.3236	NaN	NaN	NaN	NaN	NaN	NaN	NaN	NaN	26.6355	26.3189	25.3933	25.6656	25.3228	24.7415	23.9706	23.5126	21.8504	NaN	NaN	NaN	NaN	NaN	NaN	26.9111	NaN	26.5523	26.5744	26.1049
-18	27.145	27.3065	27.6213	27.1475	27.2877	27.371	27.3711	27.1654	27.3128	27.1593	26.772	26.3291	26.2052	25.5669	24.9228	25.092	24.7977	24.5805	23.807	23.5037	23.822	NaN	NaN	NaN	NaN	NaN	NaN	NaN	26.4136	26.3598	26.05	24.312	24.9247	24.7048	24.2204	23.9198	22.9298	21.5332	NaN	NaN	NaN	NaN	NaN	NaN	26.4693	NaN	25.6873	25.9761	25.501
-22	25.7195	25.7164	25.3348	25.3515	25.7892	25.6604	25.7384	25.5968	25.8238	25.3404	25.211	25.5289	24.8082	24.8784	25.3754	25.1931	24.0946	23.7933	23.1106	21.8462	22.5273	21.7851	NaN	NaN	NaN	NaN	NaN	NaN	25.9309	26.1024	25.7624	24.6905	24.412	24.231	23.5562	23.5644	22.692	21.4322	17.5975	NaN	NaN	NaN	NaN	26.5173	26.3021	NaN	25.5015	25.3711	24.8401
-26	24.0209	23.7908	23.33	23.7046	23.8717	23.9422	23.8107	24.2578	24.0107	23.9996	24.3506	24.1907	24.5604	24.7425	24.4522	23.7636	23.4881	23.1469	22.7603	21.2385	21.0957	21.2356	NaN	NaN	NaN	NaN	NaN	24.6506	25.6421	25.2474	24.3145	23.8038	23.4882	23.4229	22.9189	22.5825	22.2895	21.3412	18.4574	NaN	NaN	NaN	NaN	24.5999	25.0125	24.4721	24.7043	24.3143	23.8863
-30	22.2044	21.8422	21.9914	21.9908	22.9468	22.3527	22.273	22.93	23.1462	23.1465	22.8483	22.7897	23.3915	22.9883	22.5812	22.3032	22.6169	22.0208	21.4349	20.5307	19.7014	NaN	NaN	NaN	NaN	NaN	23.4345	23.8041	23.5478	23.9859	23.7317	22.2942	21.8583	22.1919	21.5349	21.1968	21.2332	21.0037	20.0744	NaN	NaN	NaN	NaN	23.3554	23.4895	23.2103	23.0667	22.309	22.1359
-34	20.329	19.6775	19.6414	19.5073	19.7565	19.4907	19.6722	20.1692	20.4359	20.3279	20.4041	20.5154	19.8654	20.6282	20.5913	20.0234	20.0384	20.2516	19.5862	19.1386	18.3597	NaN	NaN	NaN	NaN	19.5928	22.1007	21.4906	21.2139	21.359	21.2943	20.7906	20.8446	20.8174	19.9966	19.8274	19.5278	19.4558	20.1112	NaN	NaN	NaN	23.3361	21.3115	21.3614	21.5656	21.1254	20.5737	20.397
-38	18.7241	17.704	17.4813	17.5399	17.3376	17.1958	17.182	17.2003	17.6379	17.8255	17.4953	17.1721	16.7814	17.5256	17.4808	16.9914	16.7937	17.3263	17.8254	17.7194	16.9883	NaN	NaN	NaN	NaN	18.2369	20.1569	18.55	18.8165	18.8557	18.2119	17.3807	17.3145	17.555	16.7452	16.5256	15.8555	15.1254	17.8522	20.1249	21.1486	20.3374	20.8718	20.1098	19.8137	18.1162	18.7076	19.1837	18.6318
-42	16.6758	16.4442	15.8375	15.3958	14.8898	14.6941	15.0188	15.2462	15.6551	15.6088	14.8619	14.687	14.4808	14.5831	14.0027	14.1596	13.7804	13.9576	14.5715	15.5997	15.155	NaN	NaN	14.6402	11.8119	15.9229	16.5887	14.5744	14.288	15.0111	14.812	13.5077	13.3677	14.2043	12.8278	12.5495	11.8853	11.8947	14.0813	15.4625	16.8685	15.7051	14.3582	14.672	13.6704	11.868	13.3574	15.5501	15.7601
-46	13.4064	14.0813	14.3711	14.3065	13.2103	12.8769	13.2191	13.4669	13.4299	12.973	12.2173	12.034	11.6222	11.1535	10.9049	11.483	11.4354	10.8656	12.2267	14.3873	13.2307	NaN	NaN	11.2736	10.8435	13.3256	13.5335	11.9079	10.7365	10.696	10.2945	9.69534	9.29255	8.75992	7.97072	8.42275	8.59559	9.14504	8.90103	8.40993	8.86727	9.65321	9.50591	8.65989	7.82243	6.86016	7.36354	9.21168	9.76845
-50	11.5438	12.123	12.1512	12.2202	12.1421	11.5366	11.6157	11.6614	10.9725	10.8099	10.4571	10.4997	9.94779	9.39582	9.97794	10.3763	9.87761	8.90841	9.66222	10.0472	11.2985	NaN	NaN	9.58189	9.20412	9.1935	8.65922	7.19519	6.39211	6.02348	6.03474	5.91376	5.85529	5.03145	4.49232	4.67371	4.92969	5.04023	4.59625	4.31382	4.58897	5.14255	5.26592	5.43272	4.85117	5.18354	5.85167	5.33883	5.49454
-54	9.88016	9.99547	9.78098	9.02674	8.85966	8.19364	7.67123	7.72436	7.58635	7.57803	7.94314	8.17972	8.57879	9.39291	9.33672	9.01389	8.46021	7.92638	7.95751	8.35453	9.19324	NaN	NaN	8.13001	7.9197	6.75546	5.33582	4.19087	3.54852	2.93019	3.09144	3.25845	3.37044	3.29551	2.85915	2.65675	2.42362	2.24769	2.109	2.17701	2.5655	2.8412	3.00988	3.32776	3.22781	3.66221	4.03691	3.28863	3.60908
-58	7.14502	6.73625	5.85194	6.00676	5.15253	4.10764	3.69711	4.27367	4.77871	4.95356	5.20974	5.46536	5.65757	5.45118	5.91291	6.66401	6.55037	6.32636	7.08008	7.35342	7.10835	7.09563	6.25632	5.29276	4.64627	3.70294	3.11492	2.93806	2.50711	2.15073	2.10561	2.46699	2.37231	1.95719	1.62348	1.70519	1.61683	1.44746	1.67074	1.41659	2.07862	2.2562	2.14836	2.21966	2.67359	3.11771	2.9314	2.23541	2.38423
-62	4.50951	4.26189	3.57717	3.40792	2.77849	2.09293	2.12111	2.59822	3.09754	3.17487	3.57241	4.22685	4.03051	3.50426	3.80663	4.25183	4.22595	3.95398	4.17169	4.38916	3.96108	3.45448	2.66059	NaN	NaN	1.03726	1.46502	1.49311	0.896683	0.912757	1.18937	1.46461	1.32647	1.09769	1.12725	1.26484	1.23516	1.37851	1.40278	1.79384	1.93464	1.88891	1.76012	1.93004	2.30099	2.29367	1.89115	1.70562	1.75575
-66	2.27648	2.35796	2.08876	2.10482	1.98465	1.42194	1.06929	1.00445	0.995206	1.14676	1.57081	1.94691	1.33611	1.23327	1.47543	1.50241	1.56054	1.53225	1.87445	1.96845	1.72496	1.4305	0.734195	NaN	-0.842377	-0.622339	-0.393854	0.0989335	0.292227	0.495291	0.509812	0.667741	1.1019	1.39	1.58055	1.35487	1.26267	1.65859	2.06216	2.03105	1.71983	1.38355	0.583449	0.681827	0.633803	0.221537	NaN	NaN	0.220173
-70	0.293384	0.324657	0.207332	0.229385	0.369377	0.36656	0.225418	0.22323	0.0954284	0.050045	0.203788	0.477981	0.604531	0.339767	0.280389	0.162868	-0.194509	0.0593329	0.463519	0.632528	0.387544	NaN	NaN	NaN	NaN	-1.63962	-1.29697	-0.500267	-0.192241	0.137003	0.0468531	-0.0328207	-0.105629	NaN	NaN	NaN	NaN	NaN	NaN	NaN	NaN	NaN	NaN	NaN	NaN	NaN	NaN	NaN	NaN
-74	-0.352107	-0.465919	-0.570119	-0.619019	-0.601519	-0.397895	NaN	NaN	NaN	NaN	NaN	NaN	NaN	0.197621	1.75412	1.05722	NaN	NaN	NaN	NaN	NaN	NaN	NaN	NaN	-1.61813	-1.60273	-1.68143	-1.73663	-1.53143	-1.31772	NaN	NaN	NaN	NaN	NaN	NaN	NaN	NaN	NaN	NaN	NaN	NaN	NaN	NaN	NaN	NaN	NaN	NaN	NaN
-78	-1.07347	-1.17087	-1.28647	-1.38937	NaN	NaN	NaN	NaN	NaN	NaN	NaN	NaN	NaN	NaN	NaN	NaN	NaN	NaN	NaN	NaN	NaN	NaN	NaN	NaN	NaN	NaN	NaN	-1.62643	-1.79473	NaN	NaN	NaN	NaN	NaN	NaN	NaN	NaN	NaN	NaN	NaN	NaN	NaN	NaN	NaN	NaN	NaN	NaN	NaN	NaN
-82	NaN	NaN	NaN	NaN	NaN	NaN	NaN	NaN	NaN	NaN	NaN	NaN	NaN	NaN	NaN	NaN	NaN	NaN	NaN	NaN	NaN	NaN	NaN	NaN	NaN	NaN	NaN	NaN	NaN	NaN	NaN	NaN	NaN	NaN	NaN	NaN	NaN	NaN	NaN	NaN	NaN	NaN	NaN	NaN	NaN	NaN	NaN	NaN	NaN
-86	NaN	NaN	NaN	NaN	NaN	NaN	NaN	NaN	NaN	NaN	NaN	NaN	NaN	NaN	NaN	NaN	NaN	NaN	NaN	NaN	NaN	NaN	NaN	NaN	NaN	NaN	NaN	NaN	NaN	NaN	NaN	NaN	NaN	NaN	NaN	NaN	NaN	NaN	NaN	NaN	NaN	NaN	NaN	NaN	NaN	NaN	NaN	NaN	NaN
[truncated: 23 more columns]

## Sheet: 50.0 m
	-177.5	-172.5	-167.5	-162.5	-157.5	-152.5	-147.5	-142.5	-137.5	-132.5	-127.5	-122.5	-117.5	-112.5	-107.5	-102.5	-97.5	-92.5	-87.5	-82.5	-77.5	-72.5	-67.5	-62.5	-57.5	-52.5	-47.5	-42.5	-37.5	-32.5	-27.5	-22.5	-17.5	-12.5	-7.5	-2.5	2.5	7.5	12.5	17.5	22.5	27.5	32.5	37.5	42.5	47.5	52.5	57.5	62.5
86	-1.60021	-1.61661	-1.62661	-1.63371	-1.63291	-1.62621	-1.62111	-1.61411	-1.60631	-1.60221	-1.60171	-1.60381	-1.60881	-1.61451	-1.62001	-1.62431	-1.62841	-1.63901	-1.65291	-1.66331	-1.66641	-1.66611	-1.66361	-1.65641	-1.64301	-1.63011	-1.62151	-1.61081	-1.59641	-1.59301	-1.61351	-1.64821	-1.65671	-0.289217	0.751209	0.842039	0.985903	0.979303	0.926903	0.946503	0.948703	0.493677	0.345435	0.477519	-0.49574	-0.477197	-0.618098	-0.933302	-1.0583
82	-1.2192	-1.1934	-1.1557	-1.1183	-1.0833	-1.0598	-1.0438	-1.0387	-1.0474	-1.0651	-1.0923	-1.1303	-1.1662	-1.189	-1.1388	-1.1341	-0.969502	NaN	NaN	NaN	NaN	NaN	NaN	NaN	NaN	NaN	NaN	NaN	NaN	NaN	NaN	NaN	NaN	0.202729	3.08988	5.4104	7.25969	8.26783	8.23683	5.83323	3.57196	1.74439	1.19422	0.727797	-0.0779768	-0.517997	-0.340497	-0.0515492	0.101951
78	-1.1193	-1.1181	-1.1634	-1.1925	-1.2083	-1.206	-1.1959	-1.1774	-1.1349	-1.0736	-1.0497	-1.0963	-1.3997	NaN	0.529398	1.7373	1.0132	NaN	NaN	NaN	NaN	-0.404928	NaN	NaN	NaN	NaN	NaN	NaN	NaN	NaN	NaN	NaN	-2.05993	0.404733	4.04055	7.58648	10.254	12.2608	NaN	NaN	NaN	4.27764	3.81888	2.25895	0.638989	0.739792	0.768027	0.652254	0.431129
74	-0.369919	-0.525107	-0.73022	-0.876976	-0.902949	-0.854049	-0.986849	-1.19285	-1.26715	-1.11966	-0.850549	NaN	NaN	NaN	NaN	3.7422	NaN	NaN	NaN	NaN	NaN	-0.174451	-0.140205	-0.170233	NaN	NaN	NaN	NaN	NaN	NaN	NaN	NaN	-0.205718	1.62993	5.97908	10.1297	11.5981	10.9409	9.35041	8.78326	8.03731	7.69722	7.02706	5.61355	3.65312	3.00318	3.00306	NaN	0.596317
70	NaN	1.91056	1.83538	NaN	NaN	NaN	NaN	NaN	NaN	NaN	NaN	NaN	NaN	NaN	NaN	NaN	NaN	NaN	NaN	NaN	NaN	NaN	NaN	-0.245819	1.62275	NaN	NaN	NaN	NaN	NaN	NaN	NaN	3.2035	5.34995	8.88429	12.6337	13.6748	13.3217	12.1284	NaN	NaN	NaN	NaN	7.66724	5.20743	4.73074	4.54567	2.71164	NaN
66	NaN	NaN	NaN	NaN	NaN	NaN	NaN	NaN	NaN	NaN	NaN	NaN	NaN	NaN	NaN	NaN	NaN	NaN	NaN	NaN	NaN	NaN	NaN	-0.58003	2.74099	NaN	NaN	NaN	NaN	5.85938	7.01054	NaN	NaN	10.003	12.0736	14.4817	14.4836	13.6657	NaN	NaN	NaN	NaN	NaN	NaN	NaN	NaN	NaN	NaN	NaN
62	4.39005	3.47824	NaN	NaN	NaN	NaN	NaN	NaN	NaN	NaN	NaN	NaN	NaN	NaN	NaN	NaN	NaN	NaN	NaN	NaN	NaN	NaN	NaN	2.52391	4.10581	4.58607	NaN	NaN	8.03503	10.3096	11.6325	12.643	12.7287	13.9307	16.0896	15.4791	14.3721	NaN	NaN	NaN	NaN	NaN	NaN	NaN	NaN	NaN	NaN	NaN	NaN
58	6.93584	6.14536	6.03582	NaN	NaN	8.71711	9.28666	9.651	NaN	NaN	NaN	NaN	NaN	NaN	NaN	NaN	NaN	NaN	NaN	NaN	NaN	NaN	NaN	NaN	3.46077	5.29314	6.26129	7.15729	9.77647	12.9051	13.529	14.0821	14.3424	16.2913	16.7856	NaN	12.9901	NaN	NaN	NaN	NaN	NaN	NaN	NaN	NaN	NaN	NaN	NaN	NaN
54	7.06225	7.25213	7.50197	8.03228	8.51807	8.85382	9.22356	9.93865	10.442	11.2926	NaN	NaN	NaN	NaN	NaN	NaN	NaN	NaN	NaN	NaN	NaN	NaN	NaN	NaN	NaN	4.77506	8.02221	9.66707	10.4826	12.5282	14.1208	15.3223	15.7832	17.2342	NaN	NaN	12.8364	NaN	NaN	NaN	NaN	NaN	NaN	NaN	NaN	NaN	NaN	NaN	NaN
50	8.54429	8.27081	8.0036	8.36612	8.96433	9.7642	10.0843	10.881	11.6137	11.908	NaN	NaN	NaN	NaN	NaN	NaN	NaN	NaN	NaN	NaN	NaN	NaN	NaN	NaN	NaN	3.99715	7.75223	12.7927	14.6103	14.9724	15.9561	16.7737	17.2	18.1537	17.7758	NaN	NaN	NaN	NaN	NaN	NaN	NaN	NaN	NaN	NaN	NaN	NaN	NaN	NaN
46	12.7411	11.226	10.6986	11.0973	11.8534	12.0558	12.2359	12.8885	13.2168	13.0781	12.5475	NaN	NaN	NaN	NaN	NaN	NaN	NaN	NaN	NaN	NaN	NaN	NaN	NaN	6.6581	4.69397	7.91411	16.0691	18.2095	18.0502	18.394	18.4218	18.2135	18.176	17.9228	NaN	NaN	NaN	NaN	NaN	NaN	NaN	NaN	NaN	NaN	NaN	NaN	NaN	NaN
42	15.4866	15.0807	14.6863	14.5894	15.0006	15.0572	15.3254	15.6454	15.559	15.2242	13.6956	NaN	NaN	NaN	NaN	NaN	NaN	NaN	NaN	NaN	NaN	NaN	11.4515	13.7168	16.2795	15.4653	16.8121	21.1205	20.3453	20.0186	19.6168	19.4079	18.645	18.4034	NaN	NaN	NaN	18.3409	NaN	NaN	NaN	NaN	NaN	NaN	NaN	NaN	NaN	NaN	NaN
38	18.6213	17.9809	17.5477	17.5381	17.8542	17.7431	17.9655	17.8122	17.8562	17.3153	15.1504	NaN	NaN	NaN	NaN	NaN	NaN	NaN	NaN	NaN	NaN	19.0366	22.0848	23.644	23.9608	23.5962	22.9915	22.5257	21.5004	21.0236	20.2542	20.373	20.0531	19.6779	NaN	NaN	18.8407	19.328	18.7397	19.5151	NaN	NaN	NaN	NaN	NaN	NaN	NaN	NaN	NaN
34	20.1544	19.5468	19.5331	19.6784	20.0214	20.1509	20.3638	20.3614	19.9428	19.0596	17.3877	14.8347	NaN	NaN	NaN	NaN	NaN	NaN	NaN	NaN	NaN	24.3892	24.1031	23.8392	23.5766	23.0004	22.9854	22.6829	22.5403	22.1572	21.6876	21.4809	21.1208	20.4485	NaN	NaN	NaN	NaN	NaN	20.9466	20.4724	20.758	21.603	NaN	NaN	NaN	NaN	NaN	NaN
30	22.4686	22.3757	22.1793	22.3245	22.9189	22.865	22.5141	22.1491	21.4484	20.6216	19.6677	18.3594	16.7219	NaN	NaN	NaN	NaN	NaN	NaN	NaN	25.3131	24.3659	23.8478	23.7539	23.7821	23.7203	23.5907	23.2567	23.4265	23.3264	22.9437	22.3689	21.7954	20.3318	NaN	NaN	NaN	NaN	NaN	NaN	NaN	NaN	NaN	NaN	NaN	NaN	NaN	NaN	NaN
26	25.0179	24.957	24.7343	24.5914	24.7654	24.4315	23.9498	23.3003	22.7705	21.9793	21.3865	20.91	19.2135	NaN	NaN	NaN	NaN	25.1996	25.6902	25.0015	26.3756	25.5535	25.6056	25.7047	25.5176	25.2221	24.9486	24.6927	24.4796	23.8743	23.3425	22.879	21.1751	NaN	NaN	NaN	NaN	NaN	NaN	NaN	NaN	NaN	NaN	NaN	NaN	NaN	23.3674	NaN	NaN
22	25.9486	25.9001	26.0133	25.8792	25.5213	25.3102	24.8757	24.1759	23.81	23.6176	23.0781	22.5265	22.121	22.015	22.1698	NaN	NaN	25.8858	25.8888	27.7417	27.3549	26.9312	26.9631	27.0092	26.6839	26.1722	25.7299	25.4346	24.9826	24.4878	23.8905	22.8306	18.4635	NaN	NaN	NaN	NaN	NaN	NaN	NaN	NaN	NaN	NaN	NaN	NaN	NaN	NaN	NaN	24.3125
18	26.9901	26.8472	26.8463	26.5308	26.0887	25.6555	25.4834	25.4078	25.2822	25.2075	24.8469	24.4686	24.2357	23.5427	24.5432	NaN	NaN	NaN	NaN	27.7515	27.9784	NaN	27.6735	27.5119	27.1974	26.7601	26.2428	25.7722	25.3863	24.8634	23.9033	21.7573	17.8802	NaN	NaN	NaN	NaN	NaN	NaN	NaN	NaN	NaN	NaN	NaN	NaN	NaN	NaN	22.9711	25.0878
14	27.0928	26.8591	26.6589	26.4972	25.9064	25.5771	24.5	23.8205	23.5144	23.1088	21.9537	21.8675	23.1939	23.4904	24.0325	24.5529	22.1529	NaN	NaN	27.2703	27.2903	26.9452	27.0763	27.1853	27.5231	27.1705	26.6113	25.9207	24.8642	23.6168	22.5542	19.6282	17.3268	NaN	NaN	NaN	NaN	NaN	NaN	NaN	NaN	NaN	NaN	NaN	NaN	NaN	23.6314	24.4574	25.0249
10	27.5771	27.1353	26.7151	26.1925	25.0983	24.5366	22.8311	22.2337	21.5517	20.8004	19.5526	21.1269	22.5583	22.5755	21.6849	20.0633	18.1614	16.6133	18.7245	NaN	26.0729	NaN	NaN	NaN	27.2617	27.0217	26.1712	24.5002	23.5555	22.6528	22.2636	19.8538	18.6652	NaN	NaN	NaN	NaN	NaN	NaN	NaN	NaN	NaN	NaN	NaN	NaN	NaN	24.6809	25.5188	25.781
6	28.4608	28.2229	28.1015	27.5847	27.1754	27.2397	27.1603	27.469	26.8415	27.2167	26.5405	26.1997	26.3463	25.8293	25.1059	23.2809	22.2754	20.9564	21.1041	22.2287	NaN	NaN	NaN	NaN	NaN	NaN	26.5077	25.5089	25.4963	26.2326	25.9338	24.0911	23.6987	NaN	NaN	NaN	NaN	NaN	NaN	NaN	NaN	NaN	NaN	NaN	NaN	NaN	25.0044	24.95	26.3796
2	28.1294	28.2927	28.1005	27.3831	26.7327	26.8283	26.8818	26.754	25.6253	26.0159	25.4691	24.7607	24.2885	24.3565	24.1079	23.2067	23.1481	22.5877	20.9729	20.2639	NaN	NaN	NaN	NaN	NaN	NaN	26.8364	27.0402	26.9619	26.9203	26.6945	26.6075	26.4558	24.9872	22.5834	22.4356	21.5641	20.0349	NaN	NaN	NaN	NaN	NaN	NaN	NaN	25.0613	24.4678	24.8314	26.3274
-2	28.2865	28.0549	27.8562	27.7646	27.1947	27.0792	26.9172	26.497	25.32	25.1642	24.5685	23.3032	23.2105	23.1932	23.0701	20.9787	20.5965	20.8009	20.111	19.1534	NaN	NaN	NaN	NaN	NaN	NaN	NaN	NaN	27.0797	27.0933	26.5655	26.4329	25.2177	23.5293	22.0206	20.7564	20.4802	19.9266	NaN	NaN	NaN	NaN	NaN	NaN	NaN	25.2276	24.6508	24.6268	25.1147
-6	29.0608	28.745	28.6281	28.6853	28.2263	28.2031	28.0131	27.7117	27.3757	26.9849	25.8451	25.1299	25.4729	24.9842	25.317	23.9819	24.1064	24.4091	22.6482	NaN	NaN	NaN	NaN	NaN	NaN	NaN	NaN	NaN	NaN	27.3525	27.0666	26.7417	25.958	24.9448	23.9549	21.7539	19.6453	17.7221	NaN	NaN	NaN	NaN	NaN	NaN	25.5677	24.6728	23.8793	23.3415	23.0522
-10	28.8927	28.7891	28.613	28.605	28.5066	28.4896	28.5013	28.3351	28.1179	27.6399	27.0129	26.425	26.3326	26.0964	25.9602	24.8939	25.0512	24.9954	23.8172	22.324	NaN	NaN	NaN	NaN	NaN	NaN	NaN	NaN	NaN	27.1191	26.6838	26.5545	26.1753	25.5325	24.7996	24.0054	21.4438	17.7422	17.5789	NaN	NaN	NaN	NaN	NaN	26.0214	25.2935	25.2428	25.2737	24.3375
-14	28.0478	27.9946	28.0026	27.9584	27.8366	27.9666	27.9761	27.8495	27.6749	27.3738	27.2944	26.444	26.0624	25.8142	25.4107	24.4723	24.6616	24.4384	23.9013	23.378	20.6635	NaN	NaN	NaN	NaN	NaN	NaN	NaN	NaN	26.2366	25.9142	25.5276	25.2431	24.7476	24.1414	23.3029	22.0313	19.2409	NaN	NaN	NaN	NaN	NaN	NaN	25.8752	NaN	25.8562	26.1152	25.6046
-18	26.5244	26.6226	27.0581	26.7236	26.8487	26.961	26.8652	26.7108	26.8543	26.6152	26.1318	25.5512	25.1136	25.1434	24.5695	24.4009	24.2206	23.9698	23.2066	22.6485	22.1811	NaN	NaN	NaN	NaN	NaN	NaN	NaN	25.7715	25.6556	25.683	24.7691	24.3189	24.1597	23.5256	23.0346	21.88	20.0758	NaN	NaN	NaN	NaN	NaN	NaN	25.1002	NaN	24.5441	25.3601	24.8731
-22	24.8255	24.8334	24.6306	24.7628	25.2899	25.1324	25.0626	25.1381	24.987	24.3602	23.768	24.5816	24.3441	24.5125	24.6825	24.2791	23.5964	22.9564	22.1992	21.2501	21.4593	19.7648	NaN	NaN	NaN	NaN	NaN	NaN	25.0799	25.1744	24.9289	23.9521	23.3545	23.4369	22.9056	22.7956	21.9687	20.466	16.5688	NaN	NaN	NaN	NaN	25.0054	25.2067	NaN	24.5918	24.5136	24.0273
-26	23.0114	22.7603	22.5043	23.1092	23.1557	23.0218	22.9715	23.5652	23.0229	23.0802	23.1995	23.3405	23.8203	24.0943	23.9308	22.8761	22.6961	22.163	21.7244	20.2544	20.2222	19.4536	NaN	NaN	NaN	NaN	NaN	24.016	24.6965	24.3944	23.2993	22.6328	22.414	22.2374	21.8849	21.6309	21.453	20.4216	17.5333	NaN	NaN	NaN	NaN	23.5871	24.249	23.8611	23.5801	23.1832	22.563
-30	20.9083	20.6958	21.1688	21.1488	21.9071	21.3136	21.3684	21.8932	22.047	22.4	22.1042	21.7959	22.2981	22.1815	21.8098	21.4647	21.8572	21.0178	20.4786	19.084	18.4974	NaN	NaN	NaN	NaN	NaN	22.5512	23.0882	22.7453	23.0802	22.8012	21.222	20.9679	21.2543	20.6468	19.9975	20.1347	20.0566	19.1374	NaN	NaN	NaN	NaN	22.6897	22.7804	22.1236	21.9663	21.1077	20.5493
-34	19.0179	18.5919	18.7899	18.4444	18.9215	18.7911	19.0973	19.4397	19.6173	19.5818	19.5258	19.7723	19.3608	19.7408	19.5037	19.264	19.2842	19.3091	18.6611	17.7709	17.0058	NaN	NaN	NaN	NaN	18.8518	21.3929	20.749	20.4372	20.5246	20.6082	19.9036	19.8514	19.9548	19.0371	18.7222	18.5822	18.4894	19.3015	NaN	NaN	NaN	22.4233	20.7329	20.7266	20.5946	20.3878	19.6214	18.9324
-38	17.62	16.7604	16.4282	16.3424	16.4367	16.4971	16.611	16.6392	16.891	16.866	16.4155	16.209	15.8043	16.6052	16.4343	16.2033	15.9899	16.2899	16.6551	16.3627	15.5259	NaN	NaN	NaN	NaN	17.1099	19.3064	17.9851	18.4087	18.3824	17.7753	16.8775	16.6936	16.8264	16.1607	15.77	15.0512	14.4729	16.9366	19.1661	19.849	19.2183	20.3015	19.5576	19.1738	17.7061	18.3473	18.7325	17.7324
-42	15.8274	15.6392	14.8217	14.3636	14.0154	13.9718	14.2054	14.4578	14.7784	14.7306	13.9923	13.8139	13.7661	13.9944	13.4277	13.4162	13.0657	13.3493	14.0421	14.9312	13.9831	NaN	NaN	12.4836	9.57046	14.6485	15.7351	13.8288	13.8439	14.705	14.5188	13.2895	13.0408	13.832	12.7102	12.2927	11.564	11.3977	12.8399	14.9138	16.3995	15.2776	13.9316	13.9398	12.9494	11.65	12.9942	15.402	15.5297
-46	12.5949	13.3303	13.3848	13.1919	12.3952	12.1993	12.2094	12.6998	13.2023	12.4989	11.8102	11.5981	11.2482	10.9409	10.602	10.9172	11.0624	10.552	11.8261	13.8103	12.3236	NaN	NaN	9.78347	9.36761	12.4457	13.056	11.3433	10.2451	10.2723	9.84857	9.38481	8.98972	8.54944	7.84662	8.24942	8.33778	8.79828	8.57227	8.14984	8.67901	9.44311	9.20855	8.28137	7.55498	6.7712	7.00331	8.80501	9.45943
-50	10.9857	11.5565	11.4906	11.4662	11.4121	10.8802	10.7225	11.0025	10.4156	10.3992	10.037	9.37565	9.11403	9.21012	9.81493	10.1284	9.64727	8.73371	9.45387	9.63767	10.8016	NaN	NaN	8.68129	8.31759	8.55938	8.1821	6.65075	5.8535	5.57351	5.69647	5.69085	5.62338	4.86979	4.36173	4.46144	4.69019	4.76913	4.39604	4.12413	4.40849	4.92305	5.03642	5.1841	4.63451	5.02189	5.62763	4.98175	5.18061
-54	9.53844	9.62291	9.29902	8.71999	8.48268	7.75096	7.25804	7.41297	7.0955	7.13498	7.50171	7.46345	8.00813	8.94964	9.12253	8.74679	8.11935	7.7392	7.78274	8.04513	8.89107	NaN	NaN	7.71581	7.41595	6.31561	4.92649	3.76471	3.1155	2.5871	2.84313	3.06089	3.12235	3.04162	2.71179	2.38103	2.126	2.0327	1.89936	1.93235	2.35066	2.62012	2.71354	3.0902	3.00734	3.41735	3.81252	3.04639	3.36873
-58	6.82256	6.48079	5.63901	5.75781	4.74121	3.62687	3.34513	3.96809	4.39746	4.57573	4.78357	5.06426	5.27952	4.82872	5.05104	5.89335	6.14016	6.14059	6.8645	7.17148	6.94087	6.89764	5.93964	4.82151	4.18691	3.30946	2.73517	2.56824	2.18163	1.84367	1.74809	2.07164	2.00821	1.64847	1.34586	1.33201	1.28649	1.17344	1.35282	1.05519	1.71476	1.91416	1.5656	1.62881	2.14655	2.6155	2.43408	1.7559	1.93262
-62	4.14978	3.83893	3.10379	2.89582	2.41072	1.81791	1.87839	2.30616	2.72263	2.7799	3.11083	3.85479	3.83181	3.24965	3.35981	3.73296	3.82035	3.72234	3.97486	4.18887	3.72275	3.11068	2.21384	NaN	NaN	0.851592	1.17817	1.15781	0.642821	0.641497	0.714205	1.0017	1.07457	1.30195	1.84782	1.45946	0.978944	1.0425	0.94329	1.08514	1.25628	1.19502	0.894373	1.05254	1.44495	1.51494	1.1367	1.0335	1.17364
-66	1.76451	1.61397	1.34223	1.26802	1.265	0.987398	0.830919	0.702084	0.621395	0.781403	1.11933	1.5283	1.16057	1.06773	1.17549	1.11493	1.09762	1.03795	1.40742	1.54823	1.34763	1.04794	0.355644	NaN	-1.06459	-0.78058	-0.494906	-0.0278239	0.14519	0.306479	0.188704	0.281272	0.856611	1.59295	2.15389	1.36073	0.704273	0.815353	0.954853	0.986034	0.845588	0.623605	0.183771	0.357253	0.336002	0.0148956	NaN	NaN	0.107488
-70	0.0616019	0.0295034	-0.0793227	-0.161194	-0.138728	0.00202496	0.0764143	0.0978406	0.027104	0.000982802	-0.0417378	-0.0224137	0.0352443	0.0465072	0.184269	0.105902	-0.648876	-0.359441	-0.0254688	0.185469	0.143471	NaN	NaN	NaN	NaN	-1.67649	-1.18238	-0.455344	-0.268855	0.00592322	-0.144451	-0.314999	-0.370028	NaN	NaN	NaN	NaN	NaN	NaN	NaN	NaN	NaN	NaN	NaN	NaN	NaN	NaN	NaN	NaN
-74	-0.481212	-0.577539	-0.681939	-0.751939	-0.751139	-0.510586	NaN	NaN	NaN	NaN	NaN	NaN	NaN	0.87943	2.94683	2.44173	NaN	NaN	NaN	NaN	NaN	NaN	NaN	NaN	-1.73701	-1.69711	-1.64441	-1.64831	-1.46363	-1.31569	NaN	NaN	NaN	NaN	NaN	NaN	NaN	NaN	NaN	NaN	NaN	NaN	NaN	NaN	NaN	NaN	NaN	NaN	NaN
-78	-1.23988	-1.31748	-1.41138	-1.47708	NaN	NaN	NaN	NaN	NaN	NaN	NaN	NaN	NaN	NaN	NaN	NaN	NaN	NaN	NaN	NaN	NaN	NaN	NaN	NaN	NaN	NaN	NaN	-1.59911	-1.74121	NaN	NaN	NaN	NaN	NaN	NaN	NaN	NaN	NaN	NaN	NaN	NaN	NaN	NaN	NaN	NaN	NaN	NaN	NaN	NaN
-82	NaN	NaN	NaN	NaN	NaN	NaN	NaN	NaN	NaN	NaN	NaN	NaN	NaN	NaN	NaN	NaN	NaN	NaN	NaN	NaN	NaN	NaN	NaN	NaN	NaN	NaN	NaN	NaN	NaN	NaN	NaN	NaN	NaN	NaN	NaN	NaN	NaN	NaN	NaN	NaN	NaN	NaN	NaN	NaN	NaN	NaN	NaN	NaN	NaN
-86	NaN	NaN	NaN	NaN	NaN	NaN	NaN	NaN	NaN	NaN	NaN	NaN	NaN	NaN	NaN	NaN	NaN	NaN	NaN	NaN	NaN	NaN	NaN	NaN	NaN	NaN	NaN	NaN	NaN	NaN	NaN	NaN	NaN	NaN	NaN	NaN	NaN	NaN	NaN	NaN	NaN	NaN	NaN	NaN	NaN	NaN	NaN	NaN	NaN
[truncated: 23 more columns]

## Sheet: 75.0 m
	-177.5	-172.5	-167.5	-162.5	-157.5	-152.5	-147.5	-142.5	-137.5	-132.5	-127.5	-122.5	-117.5	-112.5	-107.5	-102.5	-97.5	-92.5	-87.5	-82.5	-77.5	-72.5	-67.5	-62.5	-57.5	-52.5	-47.5	-42.5	-37.5	-32.5	-27.5	-22.5	-17.5	-12.5	-7.5	-2.5	2.5	7.5	12.5	17.5	22.5	27.5	32.5	37.5	42.5	47.5	52.5	57.5	62.5
86	-1.35294	-1.36144	-1.36914	-1.37714	-1.38314	-1.38624	-1.38694	-1.38314	-1.38054	-1.37974	-1.38554	-1.39664	-1.41114	-1.42554	-1.43784	-1.44634	-1.45334	-1.46624	-1.48554	-1.50484	-1.50914	-1.51104	-1.51134	-1.50744	-1.49514	-1.48684	-1.48454	-1.47764	-1.47074	-1.47454	-1.49664	-1.53564	-1.54144	-0.261373	0.715628	0.815554	0.964116	0.971316	0.924416	0.957816	0.951716	0.531303	0.401566	0.576453	-0.332585	-0.405935	-0.588635	-0.905936	-1.04104
82	-0.892336	-0.903436	-0.907436	-0.915736	-0.924636	-0.931336	-0.927036	-0.918236	-0.916536	-0.924736	-0.953636	-0.986236	-1.01534	-1.04694	-1.01124	-1.02434	-0.867936	NaN	NaN	NaN	NaN	NaN	NaN	NaN	NaN	NaN	NaN	NaN	NaN	NaN	NaN	NaN	NaN	0.460565	3.14035	5.36942	7.13157	8.09284	8.10417	5.86346	3.74353	2.01129	1.51223	1.09302	0.364866	-0.0679355	-0.0380355	0.159214	0.180714
78	-0.894536	-0.969136	-1.03754	-1.06374	-1.04114	-0.979236	-0.904736	-0.845336	-0.812036	-0.797436	-0.868536	-0.949836	-1.30614	NaN	-0.586236	-0.375236	-0.165436	NaN	NaN	NaN	NaN	-0.477525	NaN	NaN	NaN	NaN	NaN	NaN	NaN	NaN	NaN	NaN	-1.82563	0.574889	3.97455	7.29099	9.82377	11.7909	NaN	NaN	NaN	4.34386	3.83857	2.32502	0.81129	0.932637	1.02565	1.01614	0.838665
74	-0.39826	-0.611218	-0.827179	-0.873964	-0.860086	-0.757786	-0.799786	-0.902386	-0.927226	-0.819067	-0.609886	NaN	NaN	NaN	NaN	0.691164	NaN	NaN	NaN	NaN	NaN	-0.332272	-0.198224	-0.119671	NaN	NaN	NaN	NaN	NaN	NaN	NaN	NaN	0.510008	2.07055	5.82186	9.40481	10.74	10.2868	8.99881	8.60342	7.93037	7.5249	6.74981	5.30739	3.42505	2.87638	2.93374	NaN	0.897
70	NaN	1.15786	0.436875	NaN	NaN	NaN	NaN	NaN	NaN	NaN	NaN	NaN	NaN	NaN	NaN	NaN	NaN	NaN	NaN	NaN	NaN	NaN	NaN	-0.083677	1.75432	NaN	NaN	NaN	NaN	NaN	NaN	NaN	3.19748	5.06296	8.30346	11.8873	12.9784	12.7814	11.8417	NaN	NaN	NaN	NaN	7.26113	5.03716	4.4414	4.32302	2.46606	NaN
66	NaN	NaN	NaN	NaN	NaN	NaN	NaN	NaN	NaN	NaN	NaN	NaN	NaN	NaN	NaN	NaN	NaN	NaN	NaN	NaN	NaN	NaN	NaN	-0.398626	3.12901	NaN	NaN	NaN	NaN	6.28031	6.93985	NaN	NaN	9.20768	11.115	13.5872	13.9974	13.4921	NaN	NaN	NaN	NaN	NaN	NaN	NaN	NaN	NaN	NaN	NaN
62	3.90612	NaN	NaN	NaN	NaN	NaN	NaN	NaN	NaN	NaN	NaN	NaN	NaN	NaN	NaN	NaN	NaN	NaN	NaN	NaN	NaN	NaN	NaN	2.54646	4.41125	5.14021	NaN	NaN	8.69448	10.2976	11.4983	12.5785	12.8556	13.785	15.6145	14.8714	14.0519	NaN	NaN	NaN	NaN	NaN	NaN	NaN	NaN	NaN	NaN	NaN	NaN
58	6.09378	5.92075	NaN	NaN	NaN	8.58312	8.54949	8.75426	NaN	NaN	NaN	NaN	NaN	NaN	NaN	NaN	NaN	NaN	NaN	NaN	NaN	NaN	NaN	NaN	3.45699	5.20572	6.20101	7.17472	9.73928	12.8829	13.8823	14.3866	14.3961	16.2155	16.4666	NaN	12.632	NaN	NaN	NaN	NaN	NaN	NaN	NaN	NaN	NaN	NaN	NaN	NaN
54	6.28336	6.64597	7.27226	7.72251	7.61116	7.6497	7.8463	8.6265	9.36249	10.4859	NaN	NaN	NaN	NaN	NaN	NaN	NaN	NaN	NaN	NaN	NaN	NaN	NaN	NaN	NaN	4.53538	7.63427	9.2972	10.0842	12.0921	13.8708	15.2514	15.8475	17.3683	NaN	NaN	12.451	NaN	NaN	NaN	NaN	NaN	NaN	NaN	NaN	NaN	NaN	NaN	NaN
50	7.52192	7.211	7.13605	7.13613	7.47753	8.32697	8.74647	9.57558	10.2221	10.2479	NaN	NaN	NaN	NaN	NaN	NaN	NaN	NaN	NaN	NaN	NaN	NaN	NaN	NaN	NaN	3.10597	6.83439	12.1394	14.3271	14.6887	15.6435	16.4627	16.6896	17.5198	17.1826	NaN	NaN	NaN	NaN	NaN	NaN	NaN	NaN	NaN	NaN	NaN	NaN	NaN	NaN
46	11.0628	9.7667	9.53764	9.65391	10.2304	10.4453	10.7012	11.1315	11.4466	11.0224	10.6074	NaN	NaN	NaN	NaN	NaN	NaN	NaN	NaN	NaN	NaN	NaN	NaN	NaN	4.42156	2.10019	6.44044	15.2905	17.9671	17.7252	17.9498	17.9561	17.5003	17.2898	17.1746	NaN	NaN	NaN	NaN	NaN	NaN	NaN	NaN	NaN	NaN	NaN	NaN	NaN	NaN
42	14.522	13.9251	13.7116	13.5188	13.3851	13.2581	13.3195	13.4253	13.5291	13.067	11.6798	NaN	NaN	NaN	NaN	NaN	NaN	NaN	NaN	NaN	NaN	NaN	10.788	12.6344	15.0406	14.1719	15.9877	20.6979	19.8189	19.316	18.7351	18.3397	17.5197	17.2277	NaN	NaN	NaN	17.0092	NaN	NaN	NaN	NaN	NaN	NaN	NaN	NaN	NaN	NaN	NaN
38	17.5366	16.8857	16.3961	16.1449	15.644	15.7178	15.9645	15.9053	16.0031	15.2673	13.1602	NaN	NaN	NaN	NaN	NaN	NaN	NaN	NaN	NaN	NaN	18.5903	21.4663	23.246	23.7061	23.2967	22.5528	21.7662	20.4726	19.8011	19.159	19.0774	18.6629	18.4362	NaN	NaN	17.2195	17.6344	17.2156	17.9734	NaN	NaN	NaN	NaN	NaN	NaN	NaN	NaN	NaN
34	18.7374	18.3913	18.0045	17.8297	17.8076	18.1803	18.7732	18.9706	18.4648	17.3544	15.4146	12.8399	NaN	NaN	NaN	NaN	NaN	NaN	NaN	NaN	NaN	23.8674	23.7928	23.4549	22.9507	22.2936	22.1056	21.6096	21.2393	20.7036	20.4991	20.4825	20.0363	19.3564	NaN	NaN	NaN	NaN	NaN	18.8627	18.9572	19.3311	19.5825	NaN	NaN	NaN	NaN	NaN	NaN
30	20.6397	20.9746	20.5316	20.6671	21.0877	21.2547	21.367	21.2563	20.5707	19.6008	18.2709	16.4713	14.4782	NaN	NaN	NaN	NaN	NaN	NaN	NaN	24.9119	23.4829	22.8989	22.6057	22.4752	22.3658	22.2951	22.0373	22.112	22.0855	21.8666	21.5492	20.7701	19.3769	NaN	NaN	NaN	NaN	NaN	NaN	NaN	NaN	NaN	NaN	NaN	NaN	NaN	NaN	NaN
26	23.5825	23.9618	23.5091	23.5923	23.796	23.5505	23.3342	22.8144	22.2452	21.4472	20.583	19.2435	16.4144	NaN	NaN	NaN	NaN	23.4317	23.8712	23.5818	25.994	24.4561	24.1858	23.9939	23.9614	24.0811	23.8994	23.5378	23.3904	22.7812	22.3364	21.7867	20.1691	NaN	NaN	NaN	NaN	NaN	NaN	NaN	NaN	NaN	NaN	NaN	NaN	NaN	NaN	NaN	NaN
22	25.4526	25.2541	25.2452	25.2092	24.9572	24.8715	24.5031	23.8791	23.3317	22.9275	22.1528	20.7664	18.9941	17.7385	17.7511	NaN	NaN	24.094	24.6788	27.5657	26.9158	25.9873	25.7809	25.6191	25.507	25.3551	24.9502	24.6427	24.2779	23.6134	22.2103	20.9643	17.6054	NaN	NaN	NaN	NaN	NaN	NaN	NaN	NaN	NaN	NaN	NaN	NaN	NaN	NaN	NaN	22.3754
18	26.7774	26.5248	26.5656	26.3632	25.6695	24.9358	24.4964	24.2328	23.6718	23.335	22.6341	21.7697	20.4777	18.5226	19.224	NaN	NaN	NaN	NaN	27.3262	27.5077	NaN	26.6313	26.4985	26.2689	25.8479	25.3878	24.7477	24.0886	22.9932	21.2216	18.7329	15.913	NaN	NaN	NaN	NaN	NaN	NaN	NaN	NaN	NaN	NaN	NaN	NaN	NaN	NaN	20.8056	23.1195
14	26.6768	26.2434	25.5911	24.9602	23.7686	22.9293	21.2545	20.8232	19.8747	19.1844	18.2085	17.8303	18.4497	18.1641	18.2044	18.8523	17.9756	NaN	NaN	25.6701	26.364	25.9493	25.7842	25.8187	26.1369	25.6775	25.0007	23.6308	22.0896	20.0529	18.1537	15.9388	14.727	NaN	NaN	NaN	NaN	NaN	NaN	NaN	NaN	NaN	NaN	NaN	NaN	NaN	21.4614	22.5467	23.5451
10	25.9296	25.0946	23.068	22.1766	20.634	19.7612	17.7925	18.4513	16.9212	16.6268	15.8282	16.7394	17.1659	16.8434	16.0688	15.8522	15.3485	14.7173	16.5233	NaN	24.0034	NaN	NaN	NaN	25.2829	24.8672	23.0471	20.116	19.4195	18.6258	17.2933	15.341	15.1389	NaN	NaN	NaN	NaN	NaN	NaN	NaN	NaN	NaN	NaN	NaN	NaN	NaN	22.8504	24.0733	24.1448
6	27.4962	27.252	26.6401	26.3886	25.8756	25.6969	25.6313	26.2076	25.3855	25.7216	25.1305	24.7153	24.0166	22.9151	21.5938	18.4622	17.0386	16.6567	17.0892	17.5175	NaN	NaN	NaN	NaN	NaN	NaN	24.9376	22.7846	23.1365	24.0134	23.1023	19.6745	18.0884	NaN	NaN	NaN	NaN	NaN	NaN	NaN	NaN	NaN	NaN	NaN	NaN	NaN	23.0208	22.6024	23.4051
2	28.0876	28.0797	27.7659	27.1733	26.5853	26.7055	26.7259	26.2855	25.057	25.7448	24.8399	23.2676	22.6781	22.3579	21.1594	19.3453	18.9446	19.1287	17.8299	16.9164	NaN	NaN	NaN	NaN	NaN	NaN	26.4205	26.6777	26.6142	26.1327	25.5895	23.7081	21.6626	19.4304	17.5857	17.3439	17.2357	17.7411	NaN	NaN	NaN	NaN	NaN	NaN	NaN	23.0305	21.91	22.5168	23.2316
-2	28.1869	27.9697	27.6673	27.579	27.0124	27.0068	26.7534	26.0432	24.6991	24.8093	23.7505	21.7553	21.4353	19.966	19.6633	17.7673	18.0643	19.1826	18.4256	17.8622	NaN	NaN	NaN	NaN	NaN	NaN	NaN	NaN	26.7025	26.5146	25.1818	23.5597	21.8695	18.7199	17.3225	16.7512	17.1572	18.0154	NaN	NaN	NaN	NaN	NaN	NaN	NaN	22.488	21.2905	21.7935	21.5684
-6	29.0052	28.5675	28.3539	28.4364	28.1266	28.1086	27.8031	27.4603	27.2146	26.843	25.336	24.6393	24.766	23.6393	23.6373	21.4895	21.5118	20.7875	19.124	NaN	NaN	NaN	NaN	NaN	NaN	NaN	NaN	NaN	NaN	27.0882	26.5593	25.5781	24.3643	21.8598	19.9691	17.7162	16.5895	16.6002	NaN	NaN	NaN	NaN	NaN	NaN	23.0664	21.0698	19.9879	19.6273	19.0213
-10	28.5109	28.4025	28.1762	28.1629	28.086	28.0094	27.9083	27.7278	27.6415	27.1522	26.5514	26.0237	25.8767	25.5891	25.5182	24.0949	23.8342	22.5238	20.9291	19.9239	NaN	NaN	NaN	NaN	NaN	NaN	NaN	NaN	NaN	26.4051	26.0176	25.8442	25.3694	24.5017	22.9712	21.1335	18.1716	16.4627	16.4831	NaN	NaN	NaN	NaN	NaN	24.5812	22.9135	22.4036	22.624	21.8418
-14	27.4289	27.4612	27.4502	27.428	27.2282	27.2846	27.1942	27.0902	26.9715	26.7268	26.5296	25.8182	25.4786	25.3383	24.9556	24.0238	24.0646	23.6024	22.846	21.8828	19.2264	NaN	NaN	NaN	NaN	NaN	NaN	NaN	NaN	25.456	24.9903	24.2709	24.4878	24.0057	23.2349	21.7616	19.8139	17.1215	NaN	NaN	NaN	NaN	NaN	NaN	24.9692	NaN	25.0884	25.2552	24.8352
-18	25.6694	25.8012	26.2573	26.0919	26.1532	26.2498	26.1324	26.0412	26.154	25.9809	25.2544	24.9971	24.7997	24.76	24.1524	24.012	23.6635	23.2353	22.4851	21.773	20.6086	NaN	NaN	NaN	NaN	NaN	NaN	NaN	24.7596	24.9654	24.6851	23.2915	23.9178	23.6653	22.8294	22.104	20.9565	18.5775	NaN	NaN	NaN	NaN	NaN	NaN	23.7892	NaN	24.708	24.7799	24.4921
-22	23.945	23.8907	23.7503	23.9361	24.6196	24.3573	24.1656	24.4624	24.1791	23.6367	22.8101	23.8493	23.8268	23.975	24.0951	23.6694	22.7581	22.1622	21.6483	20.6491	20.1431	18.1834	NaN	NaN	NaN	NaN	NaN	NaN	24.2607	24.2994	23.8243	23.1573	22.7282	22.7291	22.2091	21.8198	21.0155	19.3921	15.8355	NaN	NaN	NaN	NaN	23.2297	23.7656	NaN	23.8641	23.5516	23.2973
-26	21.9877	21.7138	21.5756	22.2125	22.4583	22.0244	22.0553	22.779	22.0938	22.1659	22.4224	22.537	23.0107	23.407	23.2096	22.1736	21.8233	21.3872	21.076	19.597	18.9452	17.8407	NaN	NaN	NaN	NaN	NaN	23.0696	23.7674	23.4102	22.426	21.7438	21.4308	21.4357	21.2052	20.8613	20.5347	19.2994	16.579	NaN	NaN	NaN	NaN	22.4148	23.0863	22.9651	22.3446	21.8965	21.5457
-30	19.6588	19.5397	20.1696	20.1718	20.6797	20.3891	20.7009	20.8135	20.7191	21.086	20.9218	20.8454	21.1175	21.3776	21.0494	20.5112	20.7951	20.2483	19.7204	18.4153	17.1887	NaN	NaN	NaN	NaN	NaN	21.1819	22.0894	21.8698	22.1692	22.0694	20.3427	19.9012	20.2951	19.8246	19.3794	19.3096	18.8994	17.8948	NaN	NaN	NaN	NaN	21.6184	21.6145	20.7675	20.5451	19.9753	19.3223
-34	17.8605	17.5022	17.7841	17.5171	17.761	17.8851	18.1029	18.3236	18.4618	18.535	18.4076	18.6772	18.6242	18.7532	18.572	18.0398	18.0289	18.3876	17.8597	16.7673	15.4286	NaN	NaN	NaN	NaN	18.1189	20.5539	19.8318	19.5205	19.5197	19.7254	18.75	18.6427	18.8068	18.1798	18.0286	17.9904	17.8268	18.2908	NaN	NaN	NaN	21.5698	19.8556	19.7469	19.4717	19.3896	18.8514	17.8098
-38	16.7378	15.9442	15.4528	15.2036	15.222	15.2895	15.3824	15.6518	15.6433	15.5472	15.1607	15.2199	14.7805	15.5856	15.2992	14.6457	14.7345	15.1411	15.5887	15.142	14.0986	NaN	NaN	NaN	NaN	16.1355	18.4794	17.2285	17.7466	17.591	17.0171	16.0707	15.9658	15.9317	15.3989	14.9413	14.3343	14.1196	16.6075	18.165	18.5278	18.6771	19.9221	19.0428	18.438	17.0744	17.8687	18.3419	16.9523
-42	14.9693	14.9408	13.9766	13.2913	12.9877	13.0364	13.1444	13.4955	13.45	13.0671	12.4097	12.8266	12.848	13.2001	12.5318	12.0453	11.7438	11.9785	12.6379	13.8658	12.8361	NaN	NaN	11.2471	8.19679	13.568	14.5161	12.8464	13.3264	14.0846	13.892	12.991	12.57	13.4186	12.4104	11.8007	11.0691	10.9814	13.0266	14.4398	15.4666	14.4528	13.3669	13.2032	12.2873	11.1686	12.3313	14.9957	14.824
-46	11.7812	12.7383	12.7173	12.3897	11.6396	11.3665	11.3338	11.6822	11.8852	11.1728	10.6542	10.8401	10.7065	10.5949	10.2423	10.3249	10.4733	9.95755	10.9532	12.9755	11.4151	NaN	NaN	8.50629	7.75165	11.2858	11.9754	10.4548	9.85021	9.62077	9.02235	8.74456	8.52435	8.31235	7.6895	8.04186	8.03243	8.22548	8.27195	7.91437	8.24127	8.81415	8.94173	7.84707	7.08635	6.46067	6.60096	8.34321	8.38625
-50	10.3402	10.9067	10.8253	10.8729	10.7647	9.99661	10.0258	10.1525	9.3478	9.55984	9.65272	9.41545	9.00294	9.00182	9.62882	9.657	9.24429	8.49492	9.08826	9.25463	10.3059	NaN	NaN	8.00453	7.42171	7.71577	7.40047	5.95171	5.29637	5.01479	5.2225	5.36849	5.41138	4.56427	3.88833	4.03773	4.29453	4.34994	4.11906	3.89063	4.02454	4.41616	4.85369	4.89192	4.29567	4.7364	5.3688	4.78075	4.94943
-54	9.04091	9.11424	8.61309	8.21326	7.88352	6.87984	6.61932	6.96669	6.60203	6.59098	7.29241	7.26076	7.80922	8.76983	8.55148	7.94798	7.50611	7.47044	7.50241	7.6582	8.44852	NaN	NaN	7.33213	6.91109	5.7534	4.31504	3.14846	2.58561	2.16803	2.49749	2.8042	2.94325	2.81407	2.38369	2.03788	1.89291	1.7559	1.58996	1.7116	2.08748	2.3387	2.54824	2.8806	2.76328	3.07563	3.34215	2.81263	3.20184
-58	6.44271	6.20792	5.3182	5.53385	4.36821	2.92647	2.62015	3.19243	3.55651	3.77358	4.34183	4.52389	4.7556	4.54549	4.82071	5.76579	5.95763	5.88304	6.52697	6.82871	6.64319	6.5411	5.50313	4.25777	3.59506	2.80262	2.26618	2.10688	1.85307	1.55115	1.39136	1.72643	1.74724	1.41644	1.1471	1.111	1.11578	1.0256	1.0032	0.710968	1.58037	1.95983	1.53756	1.38604	1.74978	2.18849	1.95689	1.40734	1.49991
-62	3.78639	3.40418	2.71594	2.60829	2.04423	1.33314	1.33634	1.6292	1.99043	2.22649	2.74362	3.23717	3.08805	2.67359	2.91271	3.3767	3.51019	3.48254	3.70507	3.86476	3.37277	2.69651	1.76741	NaN	NaN	0.683298	0.90871	0.859372	0.460716	0.456347	0.461517	0.796866	0.852435	0.55844	0.491603	0.63089	0.817151	1.01917	0.861254	0.942358	1.19084	1.20317	0.910129	0.818183	0.838314	0.987745	0.770023	0.754038	0.812883
-66	1.48848	1.24554	1.02833	0.805648	0.592601	0.349506	0.440037	0.467623	0.344571	0.449871	0.823749	1.17114	0.779534	0.845846	0.975756	0.851352	0.816785	0.791164	1.07538	1.11691	0.888223	0.633235	0.0807194	NaN	-1.07011	-0.816787	-0.613637	-0.182814	-0.0197837	0.14238	0.0799756	0.224002	0.565629	0.701389	0.790549	0.71645	0.680408	0.71617	0.668635	0.829684	0.786256	0.503478	0.0799474	0.240728	0.188055	-0.132536	NaN	NaN	0.190067
-70	0.0325165	-0.094868	-0.301561	-0.464856	-0.472785	-0.241913	0.0708055	0.121931	-0.0379775	-0.129541	-0.148843	-0.222034	-0.296095	-0.226698	0.0604812	0.104575	-0.559231	-0.359517	-0.0689917	0.0865116	-0.0575449	NaN	NaN	NaN	NaN	-1.65149	-1.20391	-0.521685	-0.348527	-0.0760342	-0.225804	-0.409753	-0.525402	NaN	NaN	NaN	NaN	NaN	NaN	NaN	NaN	NaN	NaN	NaN	NaN	NaN	NaN	NaN	NaN
-74	-0.47326	-0.607385	-0.784785	-0.881485	-0.872885	-0.612735	NaN	NaN	NaN	NaN	NaN	NaN	NaN	1.00049	3.06449	2.73339	NaN	NaN	NaN	NaN	NaN	NaN	NaN	NaN	-1.73314	-1.68934	-1.63024	-1.59934	-1.4385	-1.33102	NaN	NaN	NaN	NaN	NaN	NaN	NaN	NaN	NaN	NaN	NaN	NaN	NaN	NaN	NaN	NaN	NaN	NaN	NaN
-78	-1.29791	-1.38741	-1.51101	-1.59351	NaN	NaN	NaN	NaN	NaN	NaN	NaN	NaN	NaN	NaN	NaN	NaN	NaN	NaN	NaN	NaN	NaN	NaN	NaN	NaN	NaN	NaN	NaN	-1.62324	-1.71804	NaN	NaN	NaN	NaN	NaN	NaN	NaN	NaN	NaN	NaN	NaN	NaN	NaN	NaN	NaN	NaN	NaN	NaN	NaN	NaN
-82	NaN	NaN	NaN	NaN	NaN	NaN	NaN	NaN	NaN	NaN	NaN	NaN	NaN	NaN	NaN	NaN	NaN	NaN	NaN	NaN	NaN	NaN	NaN	NaN	NaN	NaN	NaN	NaN	NaN	NaN	NaN	NaN	NaN	NaN	NaN	NaN	NaN	NaN	NaN	NaN	NaN	NaN	NaN	NaN	NaN	NaN	NaN	NaN	NaN
-86	NaN	NaN	NaN	NaN	NaN	NaN	NaN	NaN	NaN	NaN	NaN	NaN	NaN	NaN	NaN	NaN	NaN	NaN	NaN	NaN	NaN	NaN	NaN	NaN	NaN	NaN	NaN	NaN	NaN	NaN	NaN	NaN	NaN	NaN	NaN	NaN	NaN	NaN	NaN	NaN	NaN	NaN	NaN	NaN	NaN	NaN	NaN	NaN	NaN
[truncated: 23 more columns]

## Sheet: 100.0 m
	-177.5	-172.5	-167.5	-162.5	-157.5	-152.5	-147.5	-142.5	-137.5	-132.5	-127.5	-122.5	-117.5	-112.5	-107.5	-102.5	-97.5	-92.5	-87.5	-82.5	-77.5	-72.5	-67.5	-62.5	-57.5	-52.5	-47.5	-42.5	-37.5	-32.5	-27.5	-22.5	-17.5	-12.5	-7.5	-2.5	2.5	7.5	12.5	17.5	22.5	27.5	32.5	37.5	42.5	47.5	52.5	57.5	62.5
86	-1.42158	-1.43038	-1.44008	-1.44758	-1.45078	-1.44898	-1.44358	-1.42898	-1.41678	-1.41038	-1.41298	-1.42348	-1.43788	-1.45268	-1.46318	-1.46758	-1.46738	-1.47278	-1.47808	-1.50878	-1.50148	-1.49018	-1.47668	-1.45968	-1.43718	-1.42458	-1.42738	-1.43338	-1.44938	-1.47318	-1.50718	-1.54048	-1.53578	-0.336224	0.58982	0.699134	0.854033	0.882733	0.863833	0.914333	0.924233	0.556259	0.470803	0.683646	-0.114684	-0.14555	-0.207597	-0.443159	-0.624459
82	-0.966159	-0.994659	-1.01866	-1.04406	-1.06296	-1.07106	-1.05876	-1.02846	-0.997859	-0.976359	-0.978859	-1.00226	-1.02886	-1.08556	-1.03396	-1.04896	-0.789359	NaN	NaN	NaN	NaN	NaN	NaN	NaN	NaN	NaN	NaN	NaN	NaN	NaN	NaN	NaN	NaN	0.625894	3.14705	5.30769	7.02046	7.97271	8.03273	5.93613	3.95776	2.27076	1.78619	1.39398	0.716438	0.31675	0.32445	0.524446	0.578146
78	-0.951759	-1.00656	-1.06806	-1.07836	-1.06056	-1.02856	-0.993959	-0.959659	-0.929659	-0.893459	-0.909659	-1.07426	-1.26396	NaN	-0.984859	-1.01876	NaN	NaN	NaN	NaN	NaN	-0.577538	NaN	NaN	NaN	NaN	NaN	NaN	NaN	NaN	NaN	NaN	-1.68361	0.784234	4.07376	7.21238	9.62852	11.5243	NaN	NaN	NaN	4.34108	3.83811	2.36187	0.93054	1.06428	1.2021	1.10625	0.751294
74	-0.55894	-0.505227	-0.867503	-0.755259	-0.805054	-0.756154	-0.835654	-0.947354	-0.968344	-0.892713	-0.665154	NaN	NaN	NaN	NaN	-0.230959	NaN	NaN	NaN	NaN	NaN	-0.375844	-0.137817	-0.00386763	NaN	NaN	NaN	NaN	NaN	NaN	NaN	NaN	1.10268	2.38904	5.79105	8.98629	10.2387	9.91174	8.80958	8.48121	7.8436	7.3409	6.46831	4.98843	3.16061	2.70191	2.3993	NaN	0.946246
70	NaN	NaN	NaN	NaN	NaN	NaN	NaN	NaN	NaN	NaN	NaN	NaN	NaN	NaN	NaN	NaN	NaN	NaN	NaN	NaN	NaN	NaN	NaN	0.319445	2.21568	NaN	NaN	NaN	NaN	NaN	NaN	NaN	3.08306	4.78044	7.90328	11.3834	12.4806	12.3733	11.5171	NaN	NaN	NaN	NaN	7.00954	4.49135	4.45751	NaN	NaN	NaN
66	NaN	NaN	NaN	NaN	NaN	NaN	NaN	NaN	NaN	NaN	NaN	NaN	NaN	NaN	NaN	NaN	NaN	NaN	NaN	NaN	NaN	NaN	NaN	NaN	3.40595	NaN	NaN	NaN	NaN	6.32915	6.88239	NaN	NaN	8.37053	10.2629	12.7337	13.4512	13.1897	NaN	NaN	NaN	NaN	NaN	NaN	NaN	NaN	NaN	NaN	NaN
62	NaN	NaN	NaN	NaN	NaN	NaN	NaN	NaN	NaN	NaN	NaN	NaN	NaN	NaN	NaN	NaN	NaN	NaN	NaN	NaN	NaN	NaN	NaN	2.6213	4.68364	5.55934	NaN	NaN	8.46903	10.0119	11.1554	12.3159	12.8524	13.7203	15.1955	14.2659	13.641	NaN	NaN	NaN	NaN	NaN	NaN	NaN	NaN	NaN	NaN	NaN	NaN
58	5.77765	6.05203	NaN	NaN	NaN	7.73698	7.97534	8.11658	NaN	NaN	NaN	NaN	NaN	NaN	NaN	NaN	NaN	NaN	NaN	NaN	NaN	NaN	NaN	NaN	3.66643	5.2614	6.02492	6.76597	9.11906	12.1822	13.2258	13.9704	14.1487	15.8744	16.1135	NaN	12.0965	NaN	NaN	NaN	NaN	NaN	NaN	NaN	NaN	NaN	NaN	NaN	NaN
54	5.70798	6.1759	6.81547	7.17115	6.9863	6.83762	6.76654	7.47795	8.47602	9.75703	NaN	NaN	NaN	NaN	NaN	NaN	NaN	NaN	NaN	NaN	NaN	NaN	NaN	NaN	NaN	4.37321	7.07569	8.57664	9.41582	11.4065	13.2476	14.7774	15.4378	16.9551	NaN	NaN	NaN	NaN	NaN	NaN	NaN	NaN	NaN	NaN	NaN	NaN	NaN	NaN	NaN
50	6.22289	6.13151	6.06631	6.05599	6.31343	6.99286	7.31725	8.02518	8.74223	9.12202	NaN	NaN	NaN	NaN	NaN	NaN	NaN	NaN	NaN	NaN	NaN	NaN	NaN	NaN	NaN	2.38708	6.205	11.5375	14.0137	14.3818	15.2794	16.0197	16.0994	16.8647	NaN	NaN	NaN	NaN	NaN	NaN	NaN	NaN	NaN	NaN	NaN	NaN	NaN	NaN	NaN
46	8.77617	8.40408	8.41851	8.55714	9.05797	9.22995	9.31036	9.54113	9.87077	9.54805	9.62933	NaN	NaN	NaN	NaN	NaN	NaN	NaN	NaN	NaN	NaN	NaN	NaN	NaN	3.39279	NaN	5.7092	14.8802	17.7041	17.3392	17.3248	17.1105	16.6238	16.4126	16.345	NaN	NaN	NaN	NaN	NaN	NaN	NaN	NaN	NaN	NaN	NaN	NaN	NaN	NaN
42	13.1228	12.9029	12.6937	12.391	12.1616	11.8357	11.7735	11.962	11.8631	11.1597	10.4345	NaN	NaN	NaN	NaN	NaN	NaN	NaN	NaN	NaN	NaN	NaN	10.2753	12.4735	14.7775	13.9137	15.5616	20.1354	19.1474	18.4527	17.6138	17.0209	16.2489	16.1482	NaN	NaN	NaN	16.1468	NaN	NaN	NaN	NaN	NaN	NaN	NaN	NaN	NaN	NaN	NaN
38	16.081	15.5788	14.9753	14.5393	13.9846	13.8254	13.957	14.072	14.239	13.2948	11.6112	NaN	NaN	NaN	NaN	NaN	NaN	NaN	NaN	NaN	NaN	18.0453	20.665	22.5563	23.0471	22.6263	21.7553	20.7898	19.2827	18.522	17.7559	17.5137	17.1086	17.069	NaN	NaN	16.2568	16.5771	16.466	17.118	NaN	NaN	NaN	NaN	NaN	NaN	NaN	NaN	NaN
34	17.1311	16.7743	16.1833	15.7235	15.6116	16.0436	16.6943	17.0998	16.8841	15.6467	13.6005	11.5547	NaN	NaN	NaN	NaN	NaN	NaN	NaN	NaN	NaN	22.896	22.8694	22.5088	21.9847	21.1994	20.8667	20.2223	19.7239	19.1211	18.8445	18.7163	18.4348	17.8236	NaN	NaN	NaN	NaN	NaN	17.6834	17.9621	18.2944	18.4296	NaN	NaN	NaN	NaN	NaN	NaN
30	18.7072	18.9002	18.4787	18.5324	18.9715	19.264	19.5419	19.6688	19.0871	18.2053	16.7664	14.807	13.0493	NaN	NaN	NaN	NaN	NaN	NaN	NaN	23.9726	22.2341	21.4066	21.0731	21.0248	20.7809	20.603	20.3941	20.4475	20.4336	20.2853	19.7537	19.2162	18.1079	NaN	NaN	NaN	NaN	NaN	NaN	NaN	NaN	NaN	NaN	NaN	NaN	NaN	NaN	NaN
26	21.5154	21.8079	21.4991	21.7734	22.0778	21.9041	21.6904	21.2711	20.921	20.1768	19.2274	17.6536	14.5538	NaN	NaN	NaN	NaN	21.5186	22.3214	21.9334	25.1783	23.0792	22.4824	22.2849	22.3305	22.3786	22.2152	21.6884	21.4916	21.0486	20.5792	20.0623	19.0038	NaN	NaN	NaN	NaN	NaN	NaN	NaN	NaN	NaN	NaN	NaN	NaN	NaN	NaN	NaN	NaN
22	23.7949	23.5387	23.5195	23.6952	23.571	23.5112	23.0241	22.319	21.9546	21.3296	20.2619	18.9141	16.4144	15.1739	15.3805	NaN	NaN	22.2504	NaN	26.7258	25.9661	24.5616	24.2339	24.0714	23.9015	23.8609	23.4992	22.9271	22.5273	21.9314	20.3913	19.3667	16.8494	NaN	NaN	NaN	NaN	NaN	NaN	NaN	NaN	NaN	NaN	NaN	NaN	NaN	NaN	NaN	21.0964
18	25.6249	25.2821	25.3534	25.1183	24.2893	23.3818	22.4471	22.1199	21.5463	20.8555	20.1218	18.8372	17.0059	15.3133	15.8553	NaN	NaN	NaN	NaN	26.2465	26.3724	NaN	25.1251	25.0327	24.7675	24.4223	23.8821	23.1079	22.3828	21.1909	19.1374	17.0277	14.8201	NaN	NaN	NaN	NaN	NaN	NaN	NaN	NaN	NaN	NaN	NaN	NaN	NaN	NaN	19.4383	21.4132
14	25.1088	24.464	23.6198	22.5037	21.2296	20.3184	18.6562	18.3903	17.1713	16.3344	15.7526	15.0412	15.3778	15.1826	15.0234	15.2011	15.2774	NaN	NaN	NaN	24.9295	24.4246	24.097	24.1905	24.4176	23.6683	22.7611	21.1414	19.5379	17.7283	15.7781	14.3373	13.6606	NaN	NaN	NaN	NaN	NaN	NaN	NaN	NaN	NaN	NaN	NaN	NaN	NaN	19.6684	20.9519	21.6722
10	22.5932	21.5202	19.0951	18.1693	16.7409	15.7846	14.7722	16.011	14.2673	13.9125	13.5926	14.1516	14.2307	14.2071	13.9353	14.0323	14.051	13.9574	15.3644	NaN	21.8905	NaN	NaN	NaN	22.8887	22.2172	19.6308	16.4304	15.7671	15.6066	14.5767	13.7824	13.9329	NaN	NaN	NaN	NaN	NaN	NaN	NaN	NaN	NaN	NaN	NaN	NaN	NaN	21.1613	22.1506	21.5987
6	25.4476	25.1641	24.5036	24.6933	24.0432	23.3769	23.7696	24.6927	23.2695	22.7544	21.8892	21.4588	20.0881	18.318	17.0311	15.2498	14.8721	15.2409	15.7036	15.8831	NaN	NaN	NaN	NaN	NaN	NaN	23.0531	20.3384	19.8897	20.3004	18.5039	16.0258	15.2889	NaN	NaN	NaN	NaN	NaN	NaN	NaN	NaN	NaN	NaN	NaN	NaN	NaN	20.9138	19.9473	20.0365
2	27.8588	27.5703	27.1344	26.88	26.1983	26.2488	26.2696	25.6808	23.8237	24.0859	22.5337	20.1521	19.5724	18.546	17.562	16.4125	16.7176	17.5196	16.7705	16.0925	NaN	NaN	NaN	NaN	NaN	NaN	24.6715	25.7165	24.5248	22.6053	20.1228	18.5713	17.5645	16.0993	15.6446	15.7455	15.8274	16.5614	NaN	NaN	NaN	NaN	NaN	NaN	NaN	20.1629	19.3403	19.8231	20.166
-2	27.9593	27.6133	27.3366	27.1784	26.547	26.5883	26.3721	25.2272	23.6482	23.8661	21.6878	18.1881	18.0105	16.733	16.8964	15.928	16.4491	17.8636	17.4875	17.2569	NaN	NaN	NaN	NaN	NaN	NaN	NaN	NaN	25.1144	23.0367	19.6928	18.1621	18.0378	15.9791	15.3293	15.3978	15.6553	16.664	NaN	NaN	NaN	NaN	NaN	NaN	NaN	19.135	18.4282	19.2139	19.1968
-6	28.341	28.0429	27.8775	27.9619	27.7963	27.6612	27.5099	27.1102	26.5879	26.368	24.2529	22.7955	22.2402	20.2819	20.2225	18.2724	17.9156	17.8122	17.279	NaN	NaN	NaN	NaN	NaN	NaN	NaN	NaN	NaN	NaN	25.8898	24.5118	22.3305	20.8244	18.7933	16.9819	15.9702	15.7007	15.9862	NaN	NaN	NaN	NaN	NaN	NaN	19.9714	17.5296	17.0117	16.8542	16.2927
-10	27.31	27.43	27.3382	27.3762	27.3874	27.264	27.1383	27.0079	26.8431	26.5472	25.681	25.0544	24.9323	23.8887	23.7477	22.0631	21.0807	19.6296	18.2575	18.0412	NaN	NaN	NaN	NaN	NaN	NaN	NaN	NaN	NaN	25.4813	25.1364	24.6025	23.769	22.4152	20.014	17.8097	16.3661	15.7349	15.7212	NaN	NaN	NaN	NaN	NaN	22.7031	20.5785	19.6548	19.9298	19.5752
-14	26.4514	26.6638	26.6696	26.6742	26.5256	26.5689	26.4269	26.376	26.3017	26.143	25.8974	25.1409	24.739	24.4297	24.25	23.4363	23.4885	22.8301	21.5586	20.0819	17.8812	NaN	NaN	NaN	NaN	NaN	NaN	NaN	NaN	24.772	24.2652	23.7453	23.9138	23.1862	22	19.559	17.4062	15.7104	NaN	NaN	NaN	NaN	NaN	NaN	24.0647	NaN	23.6355	23.8342	23.6116
-18	24.9404	25.074	25.4452	25.3712	25.4682	25.6308	25.4729	25.3663	25.5663	25.422	24.7545	24.3258	24.0324	24.1422	23.6875	23.5462	23.2589	22.722	22.078	21.1725	19.1616	NaN	NaN	NaN	NaN	NaN	NaN	NaN	23.5675	24.384	24.0706	22.9658	23.4687	23.0634	22.2086	21.3902	19.7393	17.258	NaN	NaN	NaN	NaN	NaN	NaN	22.5379	NaN	23.8733	24.0476	23.8552
-22	23.2356	23.2149	23.1059	23.173	23.8815	23.723	23.5604	23.8114	23.6152	23.0903	22.6414	23.2664	23.2426	23.4832	23.7145	23.3255	22.3687	21.7221	21.2191	20.1896	18.8934	17.1246	NaN	NaN	NaN	NaN	NaN	NaN	23.3145	23.6112	23.1044	22.5514	22.2938	22.2564	21.6414	21.2446	20.2776	18.3815	15.2592	NaN	NaN	NaN	NaN	21.6418	22.4132	NaN	23.117	22.8587	22.6864
-26	21.153	21.0452	20.8784	21.4523	21.7639	21.3599	21.4889	22.0475	21.5359	21.6051	21.6262	21.8901	22.3979	22.8444	22.6054	21.6684	21.2179	20.9484	20.6315	19.1111	17.8123	16.6307	NaN	NaN	NaN	NaN	NaN	22.1407	22.6453	22.434	21.7063	21.0425	20.9673	20.8976	20.6113	20.2175	19.7837	18.5821	15.9029	NaN	NaN	NaN	NaN	20.872	21.8198	21.9736	21.1745	20.952	20.6949
-30	18.9087	18.8219	19.4582	19.6316	20.2146	19.6682	19.7094	19.9483	19.9486	20.3685	20.1067	20.1619	20.5243	20.9433	20.4658	19.9567	20.0997	19.6345	19.2454	17.8396	16.1709	NaN	NaN	NaN	NaN	NaN	20.3101	21.2544	20.9956	21.4334	21.5282	19.5976	19.283	19.6376	19.1455	18.6691	18.6817	18.3139	17.0057	NaN	NaN	NaN	NaN	20.7467	20.7283	19.6272	19.3929	19.2254	18.5135
-34	17.1977	16.7335	17.2269	17.3772	17.4373	17.2674	17.2967	17.5905	17.7464	17.8462	17.7442	18.0488	18.1793	18.1307	18.0658	17.3089	17.3189	17.7332	17.3183	16.097	14.5711	NaN	NaN	NaN	NaN	17.6095	19.8651	19.2064	18.8522	18.7597	18.9762	17.9134	17.9113	18.1106	17.4945	17.2276	17.5295	17.5336	17.474	NaN	NaN	NaN	20.7603	19.5228	19.2831	18.7041	18.7182	18.3098	17.3144
-38	16.1464	15.2089	14.7498	14.5249	14.4003	14.4126	14.5277	14.8764	15.0339	14.9865	14.5465	14.3792	14.3004	14.7871	14.2593	13.7915	13.8079	14.2961	14.8641	14.4102	13.345	NaN	NaN	NaN	NaN	15.4985	17.7518	16.5874	17.1697	17.0122	16.4213	15.6886	15.5088	15.4699	14.9858	14.1902	13.7317	13.5876	15.8506	17.2551	17.6366	17.6831	18.6601	18.5128	17.7817	16.7253	17.4965	18.0512	16.8454
-42	14.3888	14.3296	13.3864	12.5588	12.2579	12.2293	12.3213	12.7167	12.563	12.2902	11.6514	11.6216	11.7761	12.2511	11.5579	11.2663	11.0958	11.2265	11.8993	13.1386	12.1961	NaN	NaN	NaN	6.55077	12.7725	13.6756	12.1172	12.7017	13.429	13.2061	12.6958	12.0736	12.8725	12.0618	11.3417	10.5666	10.4788	12.493	13.9461	14.4626	13.6099	12.8007	12.4799	11.6275	10.7617	11.4872	14.533	14.6818
-46	11.1562	12.1742	12.3116	11.9407	11.2555	10.8605	11.254	11.7633	10.8919	10.2519	9.73501	9.71902	9.71043	9.81308	9.60805	9.50578	9.49671	9.18106	11.0257	12.0582	10.8092	NaN	NaN	7.99162	6.9817	10.2467	11.0321	9.78366	9.44606	9.01596	8.07957	7.99165	7.97568	7.82753	7.27496	7.72823	7.70624	7.72709	7.88053	7.63836	7.70155	8.25272	8.68261	7.32133	6.51215	6.06122	5.97865	7.77197	8.08896
-50	9.79505	10.3796	10.4559	10.5712	10.4762	9.72962	9.88759	9.86538	8.92539	9.11213	9.04306	8.85771	8.55979	8.69044	9.39652	9.08809	8.51503	8.00755	8.85192	8.54327	9.60929	NaN	NaN	7.45541	6.89752	6.96258	6.63357	5.34401	4.79973	4.45274	4.55361	4.86831	5.07387	4.42281	3.66156	3.80422	3.99974	3.92691	3.79622	3.63784	3.67242	4.03371	4.51627	4.43732	3.95037	4.49157	5.04474	4.47778	4.7321
-54	8.60847	8.71286	8.17437	7.77441	7.46486	6.47229	6.19366	6.56807	6.26737	6.22443	6.95868	6.9922	7.53516	8.70029	8.73689	7.98962	7.36978	7.21416	7.27794	7.26224	7.9977	NaN	NaN	6.99614	6.53	5.27937	3.78676	2.728	2.24905	1.89511	2.20574	2.54609	2.659	2.51729	2.03158	1.73018	1.59863	1.51416	1.43752	1.56649	1.80243	1.98937	2.31938	2.5397	2.33424	2.66672	2.92879	2.46485	2.94686
-58	6.10792	5.80647	4.96364	5.17908	4.08804	2.52523	2.13739	2.73276	3.11971	3.36315	4.12283	4.34324	4.49727	4.34176	4.60549	5.42509	5.69094	5.67231	6.30786	6.54385	6.35452	6.29679	5.16953	3.83791	3.20219	2.50548	1.99857	1.86954	1.68816	1.4468	1.28672	1.59137	1.60779	1.28842	1.14806	1.22085	1.09749	0.88591	0.843056	0.627618	1.33511	1.75268	1.49429	1.20305	1.34139	1.72827	1.52185	1.07506	1.22211
-62	3.53437	3.16563	2.4686	2.36986	1.90609	1.14042	0.876294	1.08635	1.61278	2.05406	2.6582	3.10742	2.9469	2.50643	2.73247	3.19401	3.3179	3.23561	3.38368	3.55973	3.15832	2.58315	1.68055	NaN	NaN	0.601675	0.79437	0.746463	0.411966	0.446314	0.506584	0.825126	0.904981	1.02321	1.69643	1.59962	1.12314	1.06747	0.96954	1.4849	1.54819	1.43203	1.08464	1.1709	1.25236	1.13249	0.898844	1.08593	1.14826
-66	1.64962	1.48602	1.21343	0.736885	0.546832	0.414104	0.360749	0.30273	0.314798	0.543804	0.931656	1.27765	0.889622	0.838658	0.876714	0.740148	0.673579	0.599046	0.866968	0.944774	0.856095	0.799425	0.334261	NaN	-1.00259	-0.791808	-0.557813	-0.199029	-0.0852426	0.0974278	0.238662	0.499932	0.78567	1.09908	1.67655	1.45957	1.0349	0.81898	1.01633	1.91986	2.08906	1.50441	0.469114	0.623605	0.608735	-0.052583	NaN	NaN	0.533477
-70	0.30006	0.158204	-0.161494	-0.447507	-0.428519	-0.247317	-0.104475	-0.00472316	0.0831478	0.19333	0.146203	-0.0649528	-0.173779	-0.128871	0.109393	0.15165	-0.523796	-0.255677	0.0293726	0.0543295	-0.197927	NaN	NaN	NaN	NaN	-1.52557	-1.15092	-0.567946	-0.312812	-0.0310617	-0.116972	-0.305915	-0.54076	NaN	NaN	NaN	NaN	NaN	NaN	NaN	NaN	NaN	NaN	NaN	NaN	NaN	NaN	NaN	NaN
-74	-0.264385	-0.463837	-0.753037	-0.905537	-0.881437	-0.649932	NaN	NaN	NaN	NaN	NaN	NaN	NaN	0.852802	2.625	2.4276	NaN	NaN	NaN	NaN	NaN	NaN	NaN	NaN	-1.68198	-1.61658	-1.58218	-1.55938	-1.45723	-1.39717	NaN	NaN	NaN	NaN	NaN	NaN	NaN	NaN	NaN	NaN	NaN	NaN	NaN	NaN	NaN	NaN	NaN	NaN	NaN
-78	-1.24742	-1.35752	-1.52702	-1.66812	NaN	NaN	NaN	NaN	NaN	NaN	NaN	NaN	NaN	NaN	NaN	NaN	NaN	NaN	NaN	NaN	NaN	NaN	NaN	NaN	NaN	NaN	NaN	-1.63658	-1.72918	NaN	NaN	NaN	NaN	NaN	NaN	NaN	NaN	NaN	NaN	NaN	NaN	NaN	NaN	NaN	NaN	NaN	NaN	NaN	NaN
-82	NaN	NaN	NaN	NaN	NaN	NaN	NaN	NaN	NaN	NaN	NaN	NaN	NaN	NaN	NaN	NaN	NaN	NaN	NaN	NaN	NaN	NaN	NaN	NaN	NaN	NaN	NaN	NaN	NaN	NaN	NaN	NaN	NaN	NaN	NaN	NaN	NaN	NaN	NaN	NaN	NaN	NaN	NaN	NaN	NaN	NaN	NaN	NaN	NaN
-86	NaN	NaN	NaN	NaN	NaN	NaN	NaN	NaN	NaN	NaN	NaN	NaN	NaN	NaN	NaN	NaN	NaN	NaN	NaN	NaN	NaN	NaN	NaN	NaN	NaN	NaN	NaN	NaN	NaN	NaN	NaN	NaN	NaN	NaN	NaN	NaN	NaN	NaN	NaN	NaN	NaN	NaN	NaN	NaN	NaN	NaN	NaN	NaN	NaN
[truncated: 23 more columns]

## Sheet: 125.0 m
	-177.5	-172.5	-167.5	-162.5	-157.5	-152.5	-147.5	-142.5	-137.5	-132.5	-127.5	-122.5	-117.5	-112.5	-107.5	-102.5	-97.5	-92.5	-87.5	-82.5	-77.5	-72.5	-67.5	-62.5	-57.5	-52.5	-47.5	-42.5	-37.5	-32.5	-27.5	-22.5	-17.5	-12.5	-7.5	-2.5	2.5	7.5	12.5	17.5	22.5	27.5	32.5	37.5	42.5	47.5	52.5	57.5	62.5
86	-1.39809	-1.43289	-1.45599	-1.47439	-1.48579	-1.48319	-1.48859	-1.48209	-1.47799	-1.48249	-1.49509	-1.50959	-1.52579	-1.54179	-1.55119	-1.55139	-1.54209	-1.52799	-1.51789	-1.56319	-1.54359	-1.51489	-1.48279	-1.44369	-1.39559	-1.36369	-1.36129	-1.36369	-1.37509	-1.40189	-1.43739	-1.46189	-1.42969	-0.291614	0.601436	0.729804	0.903237	0.963137	0.975937	1.05004	1.09624	0.778523	0.713122	0.935788	0.256673	0.287182	0.313338	0.220192	0.0627924
82	-0.910908	-0.937908	-0.955308	-0.973308	-0.982408	-0.979908	-0.955808	-0.918308	-0.889608	-0.889508	-0.929008	-0.994008	-1.05391	-1.11471	-1.05931	-1.06361	-0.697308	NaN	NaN	NaN	NaN	NaN	NaN	NaN	NaN	NaN	NaN	NaN	NaN	NaN	NaN	NaN	NaN	1.11103	3.21787	5.29036	6.93253	7.85452	7.93427	5.96608	4.14529	2.89654	1.98117	1.5531	0.850497	0.429782	0.531382	0.742437	0.748337
78	-0.952508	-0.989108	-1.06471	-1.08481	-1.09421	-1.07761	-1.04311	-0.995008	-0.939608	-0.892008	-0.933908	-1.14761	-1.37361	NaN	-1.02861	-0.889808	NaN	NaN	NaN	NaN	NaN	-0.398231	NaN	NaN	NaN	NaN	NaN	NaN	NaN	NaN	NaN	NaN	-1.38708	1.07247	4.22677	7.18929	9.44342	11.206	NaN	NaN	NaN	4.3221	3.89316	2.39822	0.967221	1.02962	1.13583	1.03971	0.814532
74	-0.727895	-0.406058	-1.07025	-0.721388	-0.854963	-0.898763	-0.972663	-1.03676	-1.02061	-0.899702	-0.677363	NaN	NaN	NaN	NaN	-0.000707633	NaN	NaN	NaN	NaN	NaN	-0.280662	0.0302374	0.259463	NaN	NaN	NaN	NaN	NaN	NaN	NaN	NaN	1.06298	2.38455	5.58626	8.61803	9.81749	9.55693	8.57431	8.35073	7.75644	7.18197	6.20088	4.63372	2.81193	2.38858	2.02409	NaN	0.122841
70	NaN	NaN	NaN	NaN	NaN	NaN	NaN	NaN	NaN	NaN	NaN	NaN	NaN	NaN	NaN	NaN	NaN	NaN	NaN	NaN	NaN	NaN	NaN	0.547047	2.45475	NaN	NaN	NaN	NaN	NaN	NaN	NaN	3.03718	4.58633	7.34124	10.6447	11.8552	11.8764	11.1332	NaN	NaN	NaN	NaN	6.58298	4.22597	4.23871	NaN	NaN	NaN
66	NaN	NaN	NaN	NaN	NaN	NaN	NaN	NaN	NaN	NaN	NaN	NaN	NaN	NaN	NaN	NaN	NaN	NaN	NaN	NaN	NaN	NaN	NaN	NaN	3.47575	NaN	NaN	NaN	NaN	6.30719	6.75421	NaN	NaN	7.53201	9.39636	11.8506	12.8285	12.7924	NaN	NaN	NaN	NaN	NaN	NaN	NaN	NaN	NaN	NaN	NaN
62	NaN	NaN	NaN	NaN	NaN	NaN	NaN	NaN	NaN	NaN	NaN	NaN	NaN	NaN	NaN	NaN	NaN	NaN	NaN	NaN	NaN	NaN	NaN	2.63594	4.69294	5.71784	NaN	NaN	7.56878	9.41993	10.7335	11.8201	12.0934	12.8348	14.3664	13.6826	13.2242	NaN	NaN	NaN	NaN	NaN	NaN	NaN	NaN	NaN	NaN	NaN	NaN
58	5.25995	5.81624	NaN	NaN	NaN	NaN	7.60958	7.75599	NaN	NaN	NaN	NaN	NaN	NaN	NaN	NaN	NaN	NaN	NaN	NaN	NaN	NaN	NaN	NaN	3.70549	5.14672	5.87706	6.42996	8.42191	11.3762	12.3046	13.1383	13.4413	15.0613	15.5835	NaN	11.6881	NaN	NaN	NaN	NaN	NaN	NaN	NaN	NaN	NaN	NaN	NaN	NaN
54	5.31121	5.72422	6.43333	6.97292	6.72473	6.56571	6.43158	7.10384	8.1616	9.25413	NaN	NaN	NaN	NaN	NaN	NaN	NaN	NaN	NaN	NaN	NaN	NaN	NaN	NaN	NaN	4.21199	6.60203	7.83057	8.53993	10.4903	12.4225	14.1546	14.6875	15.8242	NaN	NaN	NaN	NaN	NaN	NaN	NaN	NaN	NaN	NaN	NaN	NaN	NaN	NaN	NaN
50	5.79741	5.54915	5.5881	5.83988	6.06371	6.56014	6.73905	7.44819	8.24705	8.67602	NaN	NaN	NaN	NaN	NaN	NaN	NaN	NaN	NaN	NaN	NaN	NaN	NaN	NaN	NaN	2.16184	5.75176	10.9708	13.4713	13.8492	14.8382	15.6001	15.607	16.2911	NaN	NaN	NaN	NaN	NaN	NaN	NaN	NaN	NaN	NaN	NaN	NaN	NaN	NaN	NaN
46	8.24961	7.81167	7.91991	8.18762	8.62637	8.75724	8.74141	8.95732	9.15069	8.8506	9.20619	NaN	NaN	NaN	NaN	NaN	NaN	NaN	NaN	NaN	NaN	NaN	NaN	NaN	3.65776	NaN	5.53567	14.4743	17.1952	16.7883	16.7552	16.4805	16.0092	15.7724	15.7884	NaN	NaN	NaN	NaN	NaN	NaN	NaN	NaN	NaN	NaN	NaN	NaN	NaN	NaN
42	12.3969	12.2093	12.0477	11.8062	11.6113	11.2947	11.139	11.1551	10.8989	10.2575	9.84533	NaN	NaN	NaN	NaN	NaN	NaN	NaN	NaN	NaN	NaN	NaN	10.173	12.5254	14.5299	13.5141	15.0427	19.5775	18.5839	17.7867	16.8561	16.2338	15.563	15.4955	NaN	NaN	NaN	15.7369	NaN	NaN	NaN	NaN	NaN	NaN	NaN	NaN	NaN	NaN	NaN
38	15.2468	14.7178	14.1823	13.8176	13.3262	13.0663	13.018	12.9723	13.0738	12.1303	10.72	NaN	NaN	NaN	NaN	NaN	NaN	NaN	NaN	NaN	NaN	17.2635	19.684	21.5976	22.1596	21.8189	20.8626	20.1069	18.6337	17.7336	16.8631	16.671	16.2209	16.2489	NaN	NaN	15.7007	15.9453	16.1507	16.7535	NaN	NaN	NaN	NaN	NaN	NaN	NaN	NaN	NaN
34	16.1434	15.6988	15.1763	14.7408	14.5541	14.7266	15.2726	15.8489	15.7845	14.5757	12.5336	10.7885	NaN	NaN	NaN	NaN	NaN	NaN	NaN	NaN	NaN	21.8557	21.8145	21.5597	21.01	20.3041	19.9683	19.4744	18.8953	18.232	17.8938	17.8856	17.5334	16.995	NaN	NaN	NaN	NaN	NaN	17.1513	17.4288	17.6631	17.8525	NaN	NaN	NaN	NaN	NaN	NaN
30	17.514	17.5033	17.1369	17.0798	17.6165	17.7789	18.227	18.5493	18.1679	17.4496	15.7774	13.4864	12.0558	NaN	NaN	NaN	NaN	NaN	NaN	NaN	22.7119	21.2029	20.3218	20.1134	20.0174	19.7961	19.5781	19.4339	19.4751	19.4835	19.27	18.8877	18.3447	17.3672	NaN	NaN	NaN	NaN	NaN	NaN	NaN	NaN	NaN	NaN	NaN	NaN	NaN	NaN	NaN
26	19.9213	20.1044	19.9308	20.1786	20.6708	20.5444	20.4385	20.2227	19.9682	19.3892	18.2273	16.045	13.1135	NaN	NaN	NaN	NaN	20.0202	21.1118	20.0579	24.0416	21.9047	21.2745	21.1634	21.2019	21.18	20.9283	20.5838	20.4152	19.9724	19.5213	19.0574	18.1956	NaN	NaN	NaN	NaN	NaN	NaN	NaN	NaN	NaN	NaN	NaN	NaN	NaN	NaN	NaN	NaN
22	22.0449	21.8401	21.868	22.0952	22.0805	22.1438	21.7387	21.1544	20.8587	20.2334	18.9765	16.9703	14.4671	13.8006	14.0611	NaN	NaN	20.3422	NaN	25.4478	24.9461	23.3298	23.0294	22.9157	22.7594	22.7218	22.2873	21.8432	21.5228	20.9325	19.5143	18.4092	16.2944	NaN	NaN	NaN	NaN	NaN	NaN	NaN	NaN	NaN	NaN	NaN	NaN	NaN	NaN	NaN	20.0505
18	24.0687	23.6955	23.616	23.3515	22.6399	21.8045	20.8925	20.4944	19.7521	18.7396	18.0618	16.317	14.7431	13.7641	14.3556	NaN	NaN	NaN	NaN	24.7644	25.1054	NaN	23.9046	23.8817	23.5981	23.2338	22.6278	21.8001	21.0619	19.8858	17.8485	15.9552	14.2112	NaN	NaN	NaN	NaN	NaN	NaN	NaN	NaN	NaN	NaN	NaN	NaN	NaN	NaN	18.3441	20.1321
14	23.1741	22.1745	21.1856	19.9839	18.972	17.938	16.5501	16.2736	14.9862	14.1981	14.0622	13.5439	13.8671	13.7495	13.607	13.5352	13.991	NaN	NaN	NaN	23.3338	22.9491	22.6168	22.6061	22.7744	21.7461	20.7311	19.03	17.658	16.2357	14.4527	13.3726	13.0549	NaN	NaN	NaN	NaN	NaN	NaN	NaN	NaN	NaN	NaN	NaN	NaN	NaN	18.1174	19.4159	20.065
10	19.0553	17.6762	15.563	14.9704	13.8805	13.1669	12.8794	14.0412	12.889	12.6679	12.4352	12.8073	12.797	13.1624	13.0684	13.1043	13.3809	13.545	14.7247	NaN	20.3412	NaN	NaN	NaN	20.4391	19.6356	16.7722	13.953	13.6152	13.7415	13.0436	12.8793	13.3765	NaN	NaN	NaN	NaN	NaN	NaN	NaN	NaN	NaN	NaN	NaN	NaN	NaN	19.4555	20.0331	19.082
6	22.7226	22.0812	21.3444	22.473	21.6683	20.5281	21.05	21.7759	20.716	19.4365	17.5638	17.3893	15.5918	14.7091	14.7049	13.9122	13.9719	14.5012	14.9436	15.0308	NaN	NaN	NaN	NaN	NaN	NaN	20.6926	17.6694	15.9502	16.0999	14.7813	14.0686	14.2708	NaN	NaN	NaN	NaN	NaN	NaN	NaN	NaN	NaN	NaN	NaN	NaN	NaN	18.949	17.4012	17.0594
2	27.0608	26.0278	25.229	25.8038	24.8834	24.6048	24.319	23.6788	21.3893	20.9159	18.8363	17.3039	16.0772	15.7686	15.7046	15.2465	15.7314	16.5336	16.1488	15.6048	NaN	NaN	NaN	NaN	NaN	NaN	22.6782	23.0454	19.6082	17.2938	15.6264	15.6168	15.3815	15.0376	14.8355	15.0261	15.2358	15.9699	NaN	NaN	NaN	NaN	NaN	NaN	NaN	17.6369	17.1334	17.2426	17.488
-2	27.3828	26.4072	26.304	26.0854	25.4667	25.3862	24.2768	23.2718	21.3533	20.9627	18.6902	15.9657	15.2843	15.1757	15.5648	15.1346	15.5786	16.9877	16.9233	16.7873	NaN	NaN	NaN	NaN	NaN	NaN	NaN	NaN	21.3271	17.4956	15.9513	15.301	15.1772	14.7435	14.5957	14.7291	15.0951	16.0178	NaN	NaN	NaN	NaN	NaN	NaN	NaN	16.3819	16.3148	17.104	17.2702
-6	27.4233	26.939	26.9395	26.978	26.9907	26.6759	26.155	25.6495	25.2414	24.3757	21.618	19.9352	19.0894	17.5065	17.6288	16.0003	16.0815	16.5356	16.5986	NaN	NaN	NaN	NaN	NaN	NaN	NaN	NaN	NaN	NaN	22.5247	20.8282	18.5409	16.9756	16.0735	15.1909	14.9798	15.129	15.5267	NaN	NaN	NaN	NaN	NaN	NaN	17.034	14.8784	15.0862	15.1209	14.8556
-10	25.8314	26.0623	26.0073	25.9758	26.0457	25.9088	25.7954	25.787	25.8067	25.2794	24.3021	23.4573	22.8236	21.7056	21.5354	19.4777	18.7158	17.6507	16.7395	17.0725	NaN	NaN	NaN	NaN	NaN	NaN	NaN	NaN	NaN	24.2448	23.1931	22.3119	20.7228	19.1003	16.9106	15.8245	15.2697	15.1933	15.2072	NaN	NaN	NaN	NaN	NaN	20.6024	18.6932	17.4933	17.6894	17.0556
-14	25.3219	25.6212	25.5883	25.4891	25.4053	25.5533	25.4269	25.5488	25.5001	25.3521	25.2067	24.4205	23.9963	23.5942	23.438	22.6414	22.6002	21.7827	19.774	18.4068	17.0103	NaN	NaN	NaN	NaN	NaN	NaN	NaN	NaN	24.2118	23.5897	23.5062	22.7016	21.343	19.3303	17.3913	15.8224	14.9043	NaN	NaN	NaN	NaN	NaN	NaN	22.7295	NaN	21.9917	22.2799	21.9701
-18	24.185	24.365	24.7212	24.5947	24.6691	24.9155	24.8017	24.7298	24.7818	24.7399	24.1566	24.2048	24.1693	23.7296	23.404	23.3016	22.9995	22.5439	21.4369	19.906	17.7747	NaN	NaN	NaN	NaN	NaN	NaN	NaN	22.2186	23.867	23.9329	23.4931	22.9305	22.2487	20.9569	19.9247	17.9846	16.1202	NaN	NaN	NaN	NaN	NaN	NaN	21.0504	NaN	23.0828	23.2863	23.1261
-22	22.56	22.5206	22.333	22.4256	23.2185	23.1476	23.0257	23.1704	22.9304	22.6028	22.3286	23.0188	23.0266	23.188	23.4003	22.929	21.9611	21.4102	21.0433	19.4446	17.3369	16.4218	NaN	NaN	NaN	NaN	NaN	NaN	22.3533	22.8621	23.0069	22.5047	21.9067	21.7106	20.9634	20.3313	19.245	17.2999	14.7479	NaN	NaN	NaN	NaN	20.0319	20.8542	NaN	22.4401	22.1602	22.012
-26	20.5576	20.3749	20.2261	20.9057	21.2178	20.5604	20.6289	21.0124	20.5739	20.751	21.1118	21.2362	21.724	22.3033	22.2752	21.4642	20.8476	20.442	20.0871	18.3038	16.4258	15.8431	NaN	NaN	NaN	NaN	NaN	21.3793	21.6729	21.5311	21.1564	20.43	20.5185	20.29	20.1596	19.5245	19.0286	17.9268	15.2522	NaN	NaN	NaN	NaN	19.262	20.739	21.2145	20.3005	20.0899	19.8609
-30	18.3549	18.1893	18.7915	18.9923	19.8597	18.8272	18.8677	19.0047	19.1475	19.5677	19.4376	19.5625	19.893	20.2726	20.1851	19.5108	19.5877	19.0507	18.7227	17.1798	15.0945	NaN	NaN	NaN	NaN	NaN	19.5072	20.4426	20.0051	20.6912	20.4933	18.8329	18.7453	19.1442	18.7663	18.2201	18.1974	17.8314	16.2842	NaN	NaN	NaN	NaN	19.5283	19.9635	19.0333	18.6206	18.3678	17.7291
-34	16.7093	16.1628	16.6131	16.7117	16.9773	16.8157	16.8614	17.0399	17.178	17.2904	17.1553	17.4274	17.6836	17.4334	17.5108	16.7341	16.5192	17.0778	16.8489	15.3956	13.6606	NaN	NaN	NaN	NaN	16.8303	19.2046	18.5549	18.1771	18.2141	18.2248	17.3143	17.4546	17.5781	16.9308	16.6264	17.1947	17.0415	16.8222	NaN	NaN	NaN	20.3676	19.0546	18.7797	18.3741	18.2596	17.7454	16.7793
-38	15.7172	14.737	14.2166	13.8817	13.6685	13.8059	13.9293	14.3049	14.494	14.5052	14.0518	13.8679	13.7306	14.0057	13.4979	12.9537	12.9767	13.5939	14.2087	13.7559	12.8736	NaN	NaN	NaN	NaN	14.8963	17.1461	16.0432	16.7394	16.6729	15.9961	15.3068	15.2278	15.1854	14.662	13.7215	13.3318	13.1631	15.0977	16.2851	16.8706	17.3841	19.0613	18.1467	16.9898	16.3724	17.294	17.6859	16.3015
-42	13.9664	13.8877	13.0043	12.0927	11.6643	11.6851	11.7236	12.2187	11.9949	11.694	11.0832	11.1019	11.0951	11.5078	10.9926	10.6654	10.4716	10.4832	11.099	12.2727	11.7764	NaN	NaN	NaN	6.09859	12.1451	12.9723	11.5418	12.1513	12.8453	12.7344	12.3751	11.7107	12.5515	11.757	10.99	10.2214	10.249	11.9741	13.3406	13.7648	12.9312	12.4085	11.9652	11.0822	10.5032	11.0849	14.2755	14.6218
-46	10.7791	11.8398	12.0423	11.6647	10.9525	10.5153	10.7555	11.5867	10.4765	9.69795	9.24061	9.29754	9.23485	9.32376	9.18922	9.02992	9.02357	8.57783	9.72577	11.021	10.3222	NaN	NaN	7.27123	6.48623	9.66103	10.247	9.11939	8.95904	8.46004	7.54372	7.45588	7.33938	7.33296	6.92298	7.45043	7.41212	7.60022	7.59159	7.22226	7.31189	7.89084	8.2332	6.82097	6.14491	5.67499	5.48467	7.48438	7.94026
-50	9.39998	10.0423	10.1883	10.2551	10.161	9.62121	9.57502	9.54213	8.45491	8.63276	8.83907	8.53695	7.92477	8.19713	8.71232	8.4117	8.20118	7.82724	8.40487	8.01793	9.17391	NaN	NaN	7.38916	6.63271	6.52606	6.12549	4.85859	4.42068	4.07438	4.05337	4.27474	4.44121	3.83981	3.34522	3.69511	3.72516	3.62297	3.50955	3.38377	3.42266	3.80714	4.09253	4.00735	3.70184	4.2365	4.62591	4.13164	4.38204
-54	8.27711	8.42384	7.98218	7.5174	7.15866	6.24878	5.88395	6.08488	5.8108	6.02373	6.84314	6.75826	7.04768	8.04062	7.92352	7.35647	7.0751	7.0843	7.09086	6.92947	7.68213	NaN	NaN	6.6936	6.23905	4.98374	3.51565	2.59294	2.21084	1.89009	2.01531	2.23406	2.4035	2.22308	2.03865	2.28612	2.13219	1.83124	1.40103	1.46364	1.65648	1.86702	2.08176	2.15534	2.03706	2.46044	2.70698	2.28641	2.70057
-58	5.87574	5.60631	5.17514	4.89009	3.83883	2.33023	1.97221	2.6383	2.99633	3.17403	3.90973	4.19894	4.34218	4.14554	4.40762	5.40335	5.63665	5.51011	6.135	6.27418	6.08303	6.08875	4.96936	3.71778	3.13203	2.44788	1.96393	1.9101	1.79971	1.58592	1.359	1.58244	1.67047	1.42227	1.50673	2.37963	2.52205	1.83434	1.20452	0.787696	1.22477	1.67986	1.49543	1.17482	1.21873	1.61248	1.6577	1.21138	1.12857
-62	3.31176	3.03861	2.4894	2.39732	2.02067	1.23598	0.872146	1.12178	1.69141	2.05303	2.49206	2.89915	2.79329	2.3373	2.53153	3.04934	3.1972	3.06866	3.16759	3.33813	3.0548	2.64256	1.8238	NaN	NaN	0.570218	0.772329	0.822585	0.588379	0.632152	0.659392	0.960647	1.06842	1.12419	1.84353	2.34398	1.96395	1.61609	1.51505	2.084	1.72325	1.71351	1.48676	1.6458	1.75394	1.5832	1.58144	1.84829	1.89125
-66	2.13463	2.11702	1.71077	1.05238	0.8349	0.728704	0.541131	0.388564	0.350051	0.575741	0.95381	1.25274	0.889775	0.871063	0.963005	0.849468	0.760275	0.645946	0.993269	1.29591	1.35827	1.29621	0.710214	NaN	-1.03192	-0.618595	-0.369672	-0.0613611	0.0280219	0.308479	0.640353	0.982232	1.22009	1.5157	2.04645	1.94561	1.43987	1.05419	1.3402	2.40166	2.54916	2.05745	1.20968	1.1579	0.753157	-0.0292807	NaN	NaN	0.812023
-70	1.14051	1.07511	0.69594	0.024512	-0.0703027	0.0290946	0.0205552	0.0416777	0.170615	0.421136	0.459857	0.198432	0.112722	0.381309	0.879846	1.00496	0.202491	0.337458	0.609636	0.719795	0.351244	NaN	NaN	NaN	NaN	-1.43101	-1.11798	-0.538973	-0.239565	0.194997	0.288669	0.17367	-0.0834424	NaN	NaN	NaN	NaN	NaN	NaN	NaN	NaN	NaN	NaN	NaN	NaN	NaN	NaN	NaN	NaN
-74	0.15294	-0.00168268	-0.305283	-0.646283	-0.678483	-0.517838	NaN	NaN	NaN	NaN	NaN	NaN	NaN	1.9978	4.0203	5.3211	NaN	NaN	NaN	NaN	NaN	NaN	NaN	NaN	-1.61229	-1.59939	-1.55489	-1.47369	-1.36387	-1.32851	NaN	NaN	NaN	NaN	NaN	NaN	NaN	NaN	NaN	NaN	NaN	NaN	NaN	NaN	NaN	NaN	NaN	NaN	NaN
-78	-1.19278	-1.28888	-1.47858	-1.67908	NaN	NaN	NaN	NaN	NaN	NaN	NaN	NaN	NaN	NaN	NaN	NaN	NaN	NaN	NaN	NaN	NaN	NaN	NaN	NaN	NaN	NaN	NaN	-1.65889	-1.70909	NaN	NaN	NaN	NaN	NaN	NaN	NaN	NaN	NaN	NaN	NaN	NaN	NaN	NaN	NaN	NaN	NaN	NaN	NaN	NaN
-82	NaN	NaN	NaN	NaN	NaN	NaN	NaN	NaN	NaN	NaN	NaN	NaN	NaN	NaN	NaN	NaN	NaN	NaN	NaN	NaN	NaN	NaN	NaN	NaN	NaN	NaN	NaN	NaN	NaN	NaN	NaN	NaN	NaN	NaN	NaN	NaN	NaN	NaN	NaN	NaN	NaN	NaN	NaN	NaN	NaN	NaN	NaN	NaN	NaN
-86	NaN	NaN	NaN	NaN	NaN	NaN	NaN	NaN	NaN	NaN	NaN	NaN	NaN	NaN	NaN	NaN	NaN	NaN	NaN	NaN	NaN	NaN	NaN	NaN	NaN	NaN	NaN	NaN	NaN	NaN	NaN	NaN	NaN	NaN	NaN	NaN	NaN	NaN	NaN	NaN	NaN	NaN	NaN	NaN	NaN	NaN	NaN	NaN	NaN
[truncated: 23 more columns]

## Sheet: 150.0m
	-177.5	-172.5	-167.5	-162.5	-157.5	-152.5	-147.5	-142.5	-137.5	-132.5	-127.5	-122.5	-117.5	-112.5	-107.5	-102.5	-97.5	-92.5	-87.5	-82.5	-77.5	-72.5	-67.5	-62.5	-57.5	-52.5	-47.5	-42.5	-37.5	-32.5	-27.5	-22.5	-17.5	-12.5	-7.5	-2.5	2.5	7.5	12.5	17.5	22.5	27.5	32.5	37.5	42.5	47.5	52.5	57.5	62.5
86	-1.15655	-1.21395	-1.24985	-1.28995	-1.32705	-1.33555	-1.36615	-1.37625	-1.38365	-1.39435	-1.40645	-1.41035	-1.41325	-1.41625	-1.41155	-1.39805	-1.37355	-1.33815	-1.32285	-1.36935	-1.33045	-1.28485	-1.23635	-1.17935	-1.10965	-1.06255	-1.05615	-1.05385	-1.05365	-1.07995	-1.11775	-1.14265	-1.09005	-0.0105911	0.844531	0.982007	1.16646	1.25026	1.30066	1.40266	1.49406	1.23995	1.19611	1.43697	0.838078	0.932206	1.0801	1.16482	1.07552
82	-0.690679	-0.713979	-0.714779	-0.718379	-0.717079	-0.711979	-0.690979	-0.665479	-0.655679	-0.690079	-0.778679	-0.895979	-0.982879	-1.01798	-0.944179	-0.900479	-0.442379	NaN	NaN	NaN	NaN	NaN	NaN	NaN	NaN	NaN	NaN	NaN	NaN	NaN	NaN	NaN	NaN	1.46893	3.43129	5.38408	6.92446	7.78977	7.87087	6.00475	4.26177	3.14661	2.1556	1.63057	0.905139	0.477306	0.752506	1.37501	1.13561
78	-1.06758	-1.07078	-1.07358	-1.06458	-1.06038	-1.03318	-0.984879	-0.923879	-0.843879	-0.782379	-0.896179	-1.27118	-1.49998	NaN	-1.55898	-1.50228	NaN	NaN	NaN	NaN	NaN	-0.315517	NaN	NaN	NaN	NaN	NaN	NaN	NaN	NaN	NaN	NaN	-0.971687	1.41065	4.38884	7.12186	9.16543	10.7827	NaN	NaN	NaN	4.15846	3.73746	2.2405	0.843816	0.898471	0.955407	0.947322	1.06503
74	-1.01941	-1.02904	NaN	-0.69648	-0.890986	-0.955486	-1.02399	-1.07209	-1.0323	-0.875109	-0.647486	NaN	NaN	NaN	NaN	-0.645779	NaN	NaN	NaN	NaN	NaN	-0.153394	0.198541	0.463007	NaN	NaN	NaN	NaN	NaN	NaN	NaN	NaN	0.839446	2.20858	5.33402	8.27095	9.43901	9.21466	8.35711	8.20401	7.60951	6.92819	5.84429	4.22775	2.45165	2.02444	1.83499	NaN	0.137172
70	NaN	NaN	NaN	NaN	NaN	NaN	NaN	NaN	NaN	NaN	NaN	NaN	NaN	NaN	NaN	NaN	NaN	NaN	NaN	NaN	NaN	NaN	NaN	0.855578	2.89493	NaN	NaN	NaN	NaN	NaN	NaN	NaN	2.87803	4.3142	6.97801	10.1901	11.451	11.5281	10.8598	NaN	NaN	NaN	NaN	6.23803	NaN	NaN	NaN	NaN	NaN
66	NaN	NaN	NaN	NaN	NaN	NaN	NaN	NaN	NaN	NaN	NaN	NaN	NaN	NaN	NaN	NaN	NaN	NaN	NaN	NaN	NaN	NaN	NaN	NaN	3.62824	NaN	NaN	NaN	NaN	6.72439	6.81023	NaN	NaN	6.93856	8.77188	11.1554	12.3424	12.5353	NaN	NaN	NaN	NaN	NaN	NaN	NaN	NaN	NaN	NaN	NaN
62	NaN	NaN	NaN	NaN	NaN	NaN	NaN	NaN	NaN	NaN	NaN	NaN	NaN	NaN	NaN	NaN	NaN	NaN	NaN	NaN	NaN	NaN	NaN	2.69734	4.59216	5.76633	NaN	NaN	7.8808	9.60417	10.4713	11.57	11.8827	12.5078	13.7934	13.1587	12.8926	NaN	NaN	NaN	NaN	NaN	NaN	NaN	NaN	NaN	NaN	NaN	NaN
58	5.15807	5.72538	NaN	NaN	NaN	NaN	7.4186	7.63568	NaN	NaN	NaN	NaN	NaN	NaN	NaN	NaN	NaN	NaN	NaN	NaN	NaN	NaN	NaN	NaN	3.58096	5.01494	5.93073	6.33611	8.15579	11.2958	11.9683	12.8225	13.2084	14.6909	15.0812	NaN	NaN	NaN	NaN	NaN	NaN	NaN	NaN	NaN	NaN	NaN	NaN	NaN	NaN
54	5.18838	5.50306	6.13947	6.68551	6.54897	6.41102	6.27677	6.98408	7.95548	8.87481	NaN	NaN	NaN	NaN	NaN	NaN	NaN	NaN	NaN	NaN	NaN	NaN	NaN	NaN	NaN	4.16354	6.44089	7.52485	7.98316	9.89185	11.9784	13.8853	14.4383	15.5083	NaN	NaN	NaN	NaN	NaN	NaN	NaN	NaN	NaN	NaN	NaN	NaN	NaN	NaN	NaN
50	5.77196	5.39419	5.41088	5.67934	5.97101	6.4041	6.58967	7.26564	8.02304	8.36445	NaN	NaN	NaN	NaN	NaN	NaN	NaN	NaN	NaN	NaN	NaN	NaN	NaN	NaN	NaN	2.35682	5.657	10.5973	12.9331	13.3257	14.4232	15.1746	15.247	15.9042	NaN	NaN	NaN	NaN	NaN	NaN	NaN	NaN	NaN	NaN	NaN	NaN	NaN	NaN	NaN
46	8.19939	7.64711	7.71389	8.11309	8.49703	8.5537	8.5818	8.69985	8.90633	8.63656	8.93845	NaN	NaN	NaN	NaN	NaN	NaN	NaN	NaN	NaN	NaN	NaN	NaN	NaN	4.38894	NaN	4.87584	14.2393	16.8712	16.3502	16.3058	15.9793	15.5562	15.3303	15.351	NaN	NaN	NaN	NaN	NaN	NaN	NaN	NaN	NaN	NaN	NaN	NaN	NaN	NaN
42	11.8677	11.7789	11.5325	11.3941	11.2848	11.0367	10.8665	10.6817	10.3423	9.78644	9.43603	NaN	NaN	NaN	NaN	NaN	NaN	NaN	NaN	NaN	NaN	NaN	9.12247	12.2255	14.0324	13.1512	14.6989	19.0807	18.1184	17.2229	16.3142	15.7223	15.0584	15.0851	NaN	NaN	NaN	15.5203	NaN	NaN	NaN	NaN	NaN	NaN	NaN	NaN	NaN	NaN	NaN
38	14.5479	14.1451	13.7333	13.3615	12.9049	12.6238	12.4409	12.0837	12.0135	11.1702	10.0345	NaN	NaN	NaN	NaN	NaN	NaN	NaN	NaN	NaN	NaN	16.2868	18.7906	20.5622	21.2441	21.1636	20.2069	19.5316	18.1828	17.164	16.2622	16.1294	15.6906	15.7669	NaN	NaN	15.3567	15.5827	15.9691	16.4927	NaN	NaN	NaN	NaN	NaN	NaN	NaN	NaN	NaN
34	15.4218	15.0492	14.7053	14.1983	13.8876	13.8737	14.2157	14.5685	14.5544	13.4196	11.5341	10.2429	NaN	NaN	NaN	NaN	NaN	NaN	NaN	NaN	NaN	20.9973	20.9933	20.7749	20.4082	19.8178	19.4369	19.0124	18.463	17.7524	17.3692	17.3829	17.0026	16.4695	NaN	NaN	NaN	NaN	NaN	16.7906	17.0789	17.2653	17.479	NaN	NaN	NaN	NaN	NaN	NaN
30	16.7838	16.6993	16.3816	16.2545	16.5198	16.6354	17.0562	17.3995	17.1964	16.4533	14.4852	12.1974	11.3532	NaN	NaN	NaN	NaN	NaN	NaN	NaN	21.5638	20.4904	19.7294	19.5507	19.4152	19.1652	18.9738	18.9132	18.9657	18.9881	18.7194	18.3392	17.7578	16.8626	NaN	NaN	NaN	NaN	NaN	NaN	NaN	NaN	NaN	NaN	NaN	NaN	NaN	NaN	NaN
26	18.8479	18.9174	18.8199	19.0612	19.4372	19.5099	19.4461	19.2802	19.0887	18.4439	16.8238	14.299	12.0878	NaN	NaN	NaN	NaN	18.8162	20.062	NaN	22.9064	21.0461	20.4204	20.3351	20.2929	20.2116	20.0576	19.7527	19.6803	19.2408	18.84	18.4071	17.5171	NaN	NaN	NaN	NaN	NaN	NaN	NaN	NaN	NaN	NaN	NaN	NaN	NaN	NaN	NaN	NaN
22	20.6565	20.5037	20.5103	20.6935	20.7806	21.062	20.7155	20.1508	19.9833	19.1839	17.1387	14.8256	13.1184	13.0517	13.2634	NaN	NaN	18.9661	NaN	24.1836	23.7671	22.3445	22.0214	21.8672	21.6773	21.6748	21.2859	20.9088	20.7209	20.0527	18.7892	17.6981	15.685	NaN	NaN	NaN	NaN	NaN	NaN	NaN	NaN	NaN	NaN	NaN	NaN	NaN	NaN	NaN	19.0799
18	22.6778	22.248	22.0199	21.6576	21.0271	20.2172	19.2926	18.7828	18.0643	16.8228	15.6424	14.2407	13.4705	12.9323	13.5113	NaN	NaN	NaN	NaN	23.2821	23.9212	NaN	22.7213	22.6917	22.3867	22.0679	21.4123	20.5167	19.76	18.6483	16.8258	15.126	13.554	NaN	NaN	NaN	NaN	NaN	NaN	NaN	NaN	NaN	NaN	NaN	NaN	NaN	NaN	17.3236	18.7858
14	21.0215	19.8531	18.9119	17.6957	16.9064	15.5031	14.3309	14.0469	13.5378	12.9681	12.8397	12.6993	13.0803	12.964	12.8985	12.8543	13.3996	NaN	NaN	NaN	21.8644	21.461	21.1259	21.0583	21.0211	19.9945	19.0065	17.3491	16.1546	15.3128	13.6561	12.7906	12.6113	NaN	NaN	NaN	NaN	NaN	NaN	NaN	NaN	NaN	NaN	NaN	NaN	NaN	16.9136	18.0372	18.4752
10	15.8918	14.8001	13.4258	12.8289	12.1949	11.667	11.666	12.2928	12.048	11.8779	11.8263	12.1268	12.1689	12.5631	12.5241	12.676	12.9949	13.2082	14.3322	NaN	19.1436	NaN	NaN	NaN	18.0809	17.2401	14.5395	12.3581	12.2421	12.6553	12.2686	12.3826	12.9923	NaN	NaN	NaN	NaN	NaN	NaN	NaN	NaN	NaN	NaN	NaN	NaN	NaN	17.7872	18.0891	17.1298
6	19.6469	18.8922	18.1938	19.7276	18.6436	17.092	17.5072	18.1589	17.1621	15.5387	13.9955	13.9457	13.2638	13.323	13.6696	13.2254	13.4195	14.0423	14.4774	14.5636	NaN	NaN	NaN	NaN	NaN	NaN	17.5004	14.6957	13.0639	13.3416	13.3032	13.2583	13.7919	NaN	NaN	NaN	NaN	NaN	NaN	NaN	NaN	NaN	NaN	NaN	NaN	NaN	16.9578	15.4552	15.3583
2	24.1651	22.6177	21.6693	22.733	21.5665	20.9539	20.3066	19.7444	18.182	16.9052	15.5309	14.841	14.5776	14.8333	14.9184	14.6189	15.0965	15.9991	15.7182	15.2371	NaN	NaN	NaN	NaN	NaN	NaN	20.5319	19.0137	15.271	14.2779	14.1268	14.3158	14.5174	14.4768	14.3853	14.575	14.8517	15.4484	NaN	NaN	NaN	NaN	NaN	NaN	NaN	15.3494	15.3803	15.4151	15.9055
-2	24.8726	23.2522	23.5574	23.3169	22.4922	22.2358	20.1737	19.5361	18.5319	17.2736	15.6086	14.4493	14.2951	14.6288	14.9002	14.6401	15.0776	16.5441	16.502	16.3631	NaN	NaN	NaN	NaN	NaN	NaN	NaN	NaN	17.4948	14.5505	14.1049	14.271	14.1281	14.1052	14.1763	14.3819	14.7598	15.4893	NaN	NaN	NaN	NaN	NaN	NaN	NaN	14.6579	14.8358	15.5753	15.9181
-6	25.8705	25.0351	25.2459	25.2117	25.1407	24.5219	23.41	22.8955	22.4748	20.8937	17.9783	17.2338	16.5272	15.5537	15.6744	14.6539	15.3078	15.9013	16.1179	NaN	NaN	NaN	NaN	NaN	NaN	NaN	NaN	NaN	NaN	18.5894	16.997	15.8575	14.6742	14.446	14.0855	14.2736	14.6515	15.0996	NaN	NaN	NaN	NaN	NaN	NaN	15.3148	13.7728	14.0075	14.0437	13.9068
-10	24.331	24.5075	24.5001	24.4961	24.5667	24.2171	24.3492	24.2736	24.1488	23.5324	22.3877	21.5002	20.7891	19.5794	19.1912	17.172	17.0843	16.38	15.9428	16.4696	NaN	NaN	NaN	NaN	NaN	NaN	NaN	NaN	NaN	21.8985	20.133	19.4272	17.9719	16.6611	14.9558	14.565	14.5769	14.7165	14.7464	NaN	NaN	NaN	NaN	NaN	19.0361	17.458	15.9927	16.0137	15.412
-14	24.1675	24.4755	24.4447	24.3415	24.2937	24.4151	24.3189	24.4839	24.3858	24.3641	24.177	23.4636	23.0976	22.7623	22.4229	21.4089	21.1924	20.3156	17.8008	17.0203	16.4411	NaN	NaN	NaN	NaN	NaN	NaN	NaN	NaN	23.2925	22.2226	21.8904	20.4681	18.7284	16.9177	15.7304	14.8622	14.2754	NaN	NaN	NaN	NaN	NaN	NaN	21.3093	NaN	20.2843	20.6982	20.33
-18	23.4057	23.5804	23.9366	23.8356	23.8168	24.1388	24.0218	24.0843	23.9185	23.9672	23.5235	23.4294	23.3078	23.2942	23.1167	22.8193	22.486	21.9282	19.9694	18.0967	16.7069	NaN	NaN	NaN	NaN	NaN	NaN	NaN	20.5846	23.1635	23.363	22.4323	21.2135	20.4622	18.7635	17.8732	16.5826	15.3056	NaN	NaN	NaN	NaN	NaN	NaN	19.5806	NaN	22.1073	22.4314	22.2604
-22	21.9116	21.8891	21.6626	21.7614	22.5062	22.539	22.3754	22.5059	22.1817	22.0367	21.8982	22.3124	22.5299	22.8985	23.1459	22.8033	21.8946	21.2298	20.5125	17.9905	15.8189	15.862	NaN	NaN	NaN	NaN	NaN	NaN	21.2536	21.7742	22.5036	21.7115	20.7592	20.6759	19.8237	18.836	17.8768	16.3001	14.1968	NaN	NaN	NaN	NaN	18.8269	19.3836	NaN	21.7026	21.5104	21.3375
-26	19.9798	19.9474	19.7005	20.2858	20.5185	19.8437	19.7423	20.011	19.8797	20.1538	20.4882	20.4104	21.1122	21.9028	21.7309	21.2653	20.5958	20.0668	19.2574	17.0991	14.9933	15.2081	NaN	NaN	NaN	NaN	NaN	20.3181	20.5518	20.3355	20.542	19.3635	19.8195	19.3868	19.2586	18.6465	18.0879	17.1238	14.5371	NaN	NaN	NaN	NaN	18.7083	19.705	20.2944	19.4268	19.2915	19.0722
-30	17.8366	17.8116	18.2821	18.3701	19.0671	18.0413	18.0578	18.2279	18.5747	18.9983	18.8972	18.867	19.0606	19.7025	19.3001	19.0502	19.3376	18.5419	18.3265	16.4143	13.9757	NaN	NaN	NaN	NaN	NaN	18.8393	19.648	19.2367	19.6451	19.7432	18.116	18.1861	18.2084	18.2177	17.9507	17.7153	17.2586	15.4807	NaN	NaN	NaN	NaN	19.2549	19.2459	18.4245	18.0024	17.7601	17.0398
-34	16.2177	15.5482	16.0418	16.1077	16.327	16.3244	16.4596	16.7216	16.7144	16.6988	16.5871	16.7146	16.3702	16.7771	16.8377	16.2369	16.3637	16.4254	16.3087	14.5635	12.8428	NaN	NaN	NaN	NaN	NaN	18.5908	18.1082	17.8485	17.8092	17.6658	16.8199	16.9932	16.9645	16.6063	16.2248	16.9244	16.7294	16.086	NaN	NaN	NaN	19.7995	18.8561	18.4185	17.9435	17.8506	17.3733	16.416
-38	15.2742	14.237	13.7264	13.2769	12.9657	13.0582	13.2775	13.7939	13.8596	13.7449	13.4208	13.328	12.8942	13.411	12.9113	11.9503	12.2143	12.8943	13.5032	12.9878	12.2768	NaN	NaN	NaN	NaN	14.7901	16.3981	15.5227	16.3301	16.2794	15.8211	15.0893	14.9109	14.9155	14.141	13.1656	13.0182	12.9757	14.4963	15.5853	16.3121	16.7241	17.9121	17.7823	16.8612	16.3847	17.1266	17.5592	16.1296
-42	13.5921	13.5416	12.6402	11.7229	11.2012	11.1518	11.142	11.7058	11.404	11.2438	10.6645	10.4517	10.4295	10.793	10.4074	9.98157	9.86793	9.98617	10.5397	11.469	11.2973	NaN	NaN	NaN	5.66451	11.4925	12.0678	10.9637	11.5973	12.2781	12.3107	12.0459	11.3768	12.3424	11.3502	10.5666	9.85689	9.59133	11.8285	12.9339	13.1935	12.4718	12.009	11.5181	10.8184	10.3227	10.7448	14.0701	14.331
-46	10.4493	11.3956	11.6852	11.4089	10.7552	10.312	10.4036	11.2867	10.1235	9.47236	9.0333	9.03446	8.76833	8.78543	8.81256	8.72411	8.70347	8.32057	9.96016	10.3477	9.90273	NaN	NaN	NaN	6.22012	8.9916	9.54179	8.558	8.49102	7.94884	7.01575	7.02062	6.92128	6.93038	6.55408	7.18933	7.03479	6.69994	7.24541	6.90819	6.95883	7.56219	7.95643	6.24446	5.78988	5.37817	5.14033	7.20667	7.5236
-50	9.05508	9.52295	9.81737	10.0002	9.83284	9.28915	9.35693	9.40585	7.95285	8.25318	8.69258	8.39387	7.71505	7.94835	8.50876	8.32414	8.08257	7.68243	8.38547	7.7372	8.83317	NaN	NaN	NaN	6.57696	6.16653	5.7201	4.54062	4.16916	3.82936	3.7473	3.88443	4.05447	3.51266	2.93175	3.47122	3.56276	3.33312	3.28421	3.20766	3.2113	3.59752	3.86819	3.76983	3.48458	3.96047	4.31098	3.86305	4.04415
-54	8.12638	8.06772	7.75366	7.30605	6.78123	5.85501	5.62758	5.798	5.38099	5.64083	6.59444	6.43148	6.73733	7.58551	7.85978	7.34622	6.99466	6.92621	6.9267	6.74634	7.48726	NaN	NaN	6.49117	6.043	4.77984	3.37828	2.57134	2.26688	2.03477	2.04511	2.06152	2.2017	2.19497	1.97548	2.321	2.50178	2.16926	1.53055	1.50677	1.65837	1.75578	1.86756	2.01109	1.88489	2.24803	2.49596	2.19413	2.4975
-58	5.99233	5.93408	5.30804	4.62207	3.62044	2.19228	1.86147	2.62261	2.97028	3.08505	3.7874	3.97358	4.09395	3.94175	4.0724	4.6392	5.04296	5.14049	5.79812	5.87994	5.7976	5.84496	4.81892	3.80499	3.25759	2.52085	2.04637	2.03317	1.95134	1.82357	1.60509	1.68732	1.73581	1.6788	1.91746	2.75267	3.10486	2.45709	1.56311	1.12634	1.36994	1.68661	1.58659	1.59574	1.54341	1.76357	2.0145	1.77315	1.48751
-62	3.39705	3.35808	2.84161	2.40969	2.0937	1.45861	1.10463	1.41369	1.98298	2.1834	2.44827	2.82831	2.77145	2.30953	2.43464	2.83478	2.89842	2.79906	2.87354	3.09453	3.01574	2.78029	2.13231	NaN	NaN	0.563366	0.78254	0.984011	0.868024	1.0205	1.13081	1.31055	1.43628	1.71198	2.44505	2.79199	2.37322	2.02485	2.23237	2.76766	2.17749	2.04628	1.87162	2.30177	2.38562	2.03642	2.11795	2.46034	2.50267
-66	2.55975	2.55228	2.31338	1.66151	1.31063	1.22802	0.998586	0.788625	0.781041	0.968178	1.25008	1.61249	1.31065	1.07325	1.00034	0.849566	0.82684	0.801814	1.28965	1.86828	2.05498	1.92201	1.08945	NaN	-1.22652	-0.491566	-0.0526714	0.280524	0.360153	0.719309	1.09849	1.39474	1.69668	2.2051	2.5768	2.26055	1.64412	1.28189	1.67385	2.80066	2.97299	2.39507	1.58822	1.47758	0.823175	-0.0457159	NaN	NaN	1.01005
-70	1.71994	1.63573	1.274	0.630955	0.549951	0.649681	0.546259	0.469755	0.630713	0.912068	0.964618	0.669294	0.421598	0.502679	0.942592	1.17156	0.716642	0.832902	1.12338	1.35973	1.04841	NaN	NaN	NaN	NaN	-1.25239	-0.930967	-0.366202	-0.104668	0.430139	0.572158	0.415246	-0.0591717	NaN	NaN	NaN	NaN	NaN	NaN	NaN	NaN	NaN	NaN	NaN	NaN	NaN	NaN	NaN	NaN
-74	0.379778	0.289782	-0.0155177	-0.385318	-0.424718	-0.234026	NaN	NaN	NaN	NaN	NaN	NaN	NaN	1.0479	2.7451	4.3995	NaN	NaN	NaN	NaN	NaN	NaN	NaN	NaN	-1.62125	-1.57065	-1.53805	-1.45095	-1.34374	-1.3106	NaN	NaN	NaN	NaN	NaN	NaN	NaN	NaN	NaN	NaN	NaN	NaN	NaN	NaN	NaN	NaN	NaN	NaN	NaN
-78	-1.19197	-1.24187	-1.46097	-1.70977	NaN	NaN	NaN	NaN	NaN	NaN	NaN	NaN	NaN	NaN	NaN	NaN	NaN	NaN	NaN	NaN	NaN	NaN	NaN	NaN	NaN	NaN	NaN	-1.65775	-1.69235	NaN	NaN	NaN	NaN	NaN	NaN	NaN	NaN	NaN	NaN	NaN	NaN	NaN	NaN	NaN	NaN	NaN	NaN	NaN	NaN
-82	NaN	NaN	NaN	NaN	NaN	NaN	NaN	NaN	NaN	NaN	NaN	NaN	NaN	NaN	NaN	NaN	NaN	NaN	NaN	NaN	NaN	NaN	NaN	NaN	NaN	NaN	NaN	NaN	NaN	NaN	NaN	NaN	NaN	NaN	NaN	NaN	NaN	NaN	NaN	NaN	NaN	NaN	NaN	NaN	NaN	NaN	NaN	NaN	NaN
-86	NaN	NaN	NaN	NaN	NaN	NaN	NaN	NaN	NaN	NaN	NaN	NaN	NaN	NaN	NaN	NaN	NaN	NaN	NaN	NaN	NaN	NaN	NaN	NaN	NaN	NaN	NaN	NaN	NaN	NaN	NaN	NaN	NaN	NaN	NaN	NaN	NaN	NaN	NaN	NaN	NaN	NaN	NaN	NaN	NaN	NaN	NaN	NaN	NaN
[truncated: 23 more columns]

## Sheet: 200.0 m
	-177.5	-172.5	-167.5	-162.5	-157.5	-152.5	-147.5	-142.5	-137.5	-132.5	-127.5	-122.5	-117.5	-112.5	-107.5	-102.5	-97.5	-92.5	-87.5	-82.5	-77.5	-72.5	-67.5	-62.5	-57.5	-52.5	-47.5	-42.5	-37.5	-32.5	-27.5	-22.5	-17.5	-12.5	-7.5	-2.5	2.5	7.5	12.5	17.5	22.5	27.5	32.5	37.5	42.5	47.5	52.5	57.5	62.5
86	-0.681966	-0.780966	-0.863066	-0.925366	-0.972266	-0.998766	-1.00727	-0.996566	-0.976266	-0.953366	-0.930466	-0.911166	-0.900166	-0.890066	-0.872366	-0.844566	-0.804566	-0.744866	-0.712666	-0.743166	-0.686566	-0.621266	-0.551266	-0.471966	-0.396666	-0.336266	-0.309466	-0.308566	-0.330666	-0.365466	-0.403966	-0.402866	-0.341066	0.641585	1.42402	1.55844	1.74031	1.83351	1.91091	2.03241	2.14751	1.94541	1.92445	2.06994	1.50976	1.52447	1.53769	1.62113	1.60713
82	-0.719074	-0.777274	-0.830974	-0.899674	-0.962374	-1.00427	-0.994374	-0.913474	-0.772374	-0.614074	-0.479574	-0.402874	-0.376174	-0.389574	-0.367574	-0.196574	0.167226	NaN	NaN	NaN	NaN	NaN	NaN	NaN	NaN	NaN	NaN	NaN	NaN	NaN	NaN	NaN	NaN	2.0207	3.78769	5.49994	6.85999	7.6603	7.80501	6.25501	5.01469	4.0478	3.63952	2.84548	2.12077	1.77477	1.95747	1.77075	1.43825
78	-0.997874	-0.966574	-0.989874	-1.06297	-1.15217	-1.23867	-1.26427	-1.18787	-0.996274	-0.756774	-0.581074	-0.633674	-0.761374	NaN	-0.968774	NaN	NaN	NaN	NaN	NaN	NaN	NaN	NaN	NaN	NaN	NaN	NaN	NaN	NaN	NaN	NaN	NaN	NaN	2.08802	4.5967	6.85228	8.53885	10.0009	NaN	NaN	NaN	NaN	NaN	NaN	0.814117	0.814305	1.02243	NaN	1.3835
74	NaN	-0.729764	NaN	-0.951156	-0.815051	-0.905351	-0.943351	-0.931251	-0.783796	-0.536344	-0.325851	NaN	NaN	NaN	NaN	0.183026	NaN	NaN	NaN	NaN	NaN	0.155534	0.540723	0.796518	NaN	NaN	NaN	NaN	NaN	NaN	NaN	NaN	1.49876	2.4389	5.00394	7.49049	8.51885	8.40106	7.79939	7.82434	7.59675	6.47553	5.64276	3.70023	1.78444	NaN	NaN	NaN	NaN
70	NaN	NaN	NaN	NaN	NaN	NaN	NaN	NaN	NaN	NaN	NaN	NaN	NaN	NaN	NaN	NaN	NaN	NaN	NaN	NaN	NaN	NaN	NaN	1.50761	3.78219	NaN	NaN	NaN	NaN	NaN	NaN	NaN	2.76565	3.99061	6.29628	9.10069	10.3163	10.6131	10.1968	NaN	NaN	NaN	NaN	NaN	NaN	NaN	NaN	NaN	NaN
66	NaN	NaN	NaN	NaN	NaN	NaN	NaN	NaN	NaN	NaN	NaN	NaN	NaN	NaN	NaN	NaN	NaN	NaN	NaN	NaN	NaN	NaN	NaN	NaN	3.78622	NaN	NaN	NaN	NaN	6.6052	6.52124	NaN	NaN	5.82187	7.60201	9.77397	11.2275	11.8318	NaN	NaN	NaN	NaN	NaN	NaN	NaN	NaN	NaN	NaN	NaN
62	NaN	NaN	NaN	NaN	NaN	NaN	NaN	NaN	NaN	NaN	NaN	NaN	NaN	NaN	NaN	NaN	NaN	NaN	NaN	NaN	NaN	NaN	NaN	3.16814	4.89096	6.23864	NaN	NaN	7.58873	9.14769	10.0874	11.2119	11.4788	11.8871	12.7899	12.0318	12.5325	NaN	NaN	NaN	NaN	NaN	NaN	NaN	NaN	NaN	NaN	NaN	NaN
58	5.07688	5.31263	NaN	NaN	NaN	NaN	6.81041	7.00545	NaN	NaN	NaN	NaN	NaN	NaN	NaN	NaN	NaN	NaN	NaN	NaN	NaN	NaN	NaN	NaN	3.93754	5.11842	5.86863	6.08342	7.62833	10.1997	11.0824	12.3142	12.7965	14.1356	14.4209	NaN	NaN	NaN	NaN	NaN	NaN	NaN	NaN	NaN	NaN	NaN	NaN	NaN	NaN
54	5.15703	5.35588	5.91305	6.4491	6.24371	6.10104	5.89935	6.40946	7.25349	8.14045	NaN	NaN	NaN	NaN	NaN	NaN	NaN	NaN	NaN	NaN	NaN	NaN	NaN	NaN	NaN	4.20365	5.98123	6.8172	7.39017	9.03924	11.0764	13.1071	13.8421	14.9976	NaN	NaN	NaN	NaN	NaN	NaN	NaN	NaN	NaN	NaN	NaN	NaN	NaN	NaN	NaN
50	5.59744	5.29204	5.26531	5.53338	5.71543	6.12271	6.26113	6.80282	7.50334	7.84155	NaN	NaN	NaN	NaN	NaN	NaN	NaN	NaN	NaN	NaN	NaN	NaN	NaN	NaN	NaN	3.08384	5.51743	9.7611	11.9309	12.321	13.5304	14.4244	14.6278	15.2831	NaN	NaN	NaN	NaN	NaN	NaN	NaN	NaN	NaN	NaN	NaN	NaN	NaN	NaN	NaN
46	7.64699	7.27989	7.49609	7.85938	8.16711	8.25891	8.25509	8.37073	8.59379	8.20505	8.37594	NaN	NaN	NaN	NaN	NaN	NaN	NaN	NaN	NaN	NaN	NaN	NaN	NaN	6.12242	NaN	5.11437	13.4941	15.9411	15.5103	15.5608	15.3435	14.9742	14.7386	14.7031	NaN	NaN	NaN	NaN	NaN	NaN	NaN	NaN	NaN	NaN	NaN	NaN	NaN	NaN
42	10.9201	11.0126	10.9272	10.8779	10.8747	10.6964	10.4942	10.2284	9.72234	9.01588	8.69553	NaN	NaN	NaN	NaN	NaN	NaN	NaN	NaN	NaN	NaN	NaN	NaN	11.4753	13.2497	12.4239	14.0025	18.198	17.3067	16.4211	15.6251	15.0836	14.4678	14.4839	NaN	NaN	NaN	15.273	NaN	NaN	NaN	NaN	NaN	NaN	NaN	NaN	NaN	NaN	NaN
38	13.5008	13.1753	12.8031	12.5792	12.287	12.0474	11.6795	11.01	10.5391	9.73907	9.09681	NaN	NaN	NaN	NaN	NaN	NaN	NaN	NaN	NaN	NaN	14.5418	17.1733	18.9315	19.9379	20.0505	19.2159	18.6356	17.2857	16.2817	15.4719	15.3425	14.9361	15.0109	NaN	NaN	14.9554	15.1403	15.7546	16.2178	NaN	NaN	NaN	NaN	NaN	NaN	NaN	NaN	NaN
34	14.4566	14.1266	13.7968	13.2956	12.945	12.717	12.6075	12.4402	11.9912	10.9813	9.96094	9.3999	NaN	NaN	NaN	NaN	NaN	NaN	NaN	NaN	NaN	19.7235	19.9915	19.837	19.6397	19.1424	18.7864	18.328	17.6683	16.9213	16.5508	16.5594	16.1414	15.612	NaN	NaN	NaN	NaN	NaN	16.288	16.5835	16.6799	16.9228	NaN	NaN	NaN	NaN	NaN	NaN
30	15.6703	15.45	15.0296	14.7853	14.7948	14.5564	14.5077	14.6471	14.2814	13.1767	11.5624	10.2738	10.3422	NaN	NaN	NaN	NaN	NaN	NaN	NaN	19.6504	19.6332	19.073	18.9619	18.8823	18.6015	18.3496	18.2577	18.2701	18.1686	17.9216	17.5537	16.8759	16.0129	NaN	NaN	NaN	NaN	NaN	NaN	NaN	NaN	NaN	NaN	NaN	NaN	NaN	NaN	NaN
26	17.0983	16.9834	16.8632	16.9334	17.1499	17.2136	17.0624	16.9781	16.653	15.2171	13.0879	11.398	10.9587	NaN	NaN	NaN	NaN	16.6896	17.8278	NaN	20.8838	19.7633	19.3125	19.1888	19.048	18.8869	18.6411	18.4041	18.4341	18.0201	17.7226	17.4307	16.5029	NaN	NaN	NaN	NaN	NaN	NaN	NaN	NaN	NaN	NaN	NaN	NaN	NaN	NaN	NaN	NaN
22	18.1705	17.8811	17.9647	18.1292	18.2434	18.6942	18.2078	17.7563	17.2552	15.4627	13.1759	11.8058	11.7584	12.1708	12.3129	NaN	NaN	16.5536	NaN	21.4003	21.2813	20.3814	20.1218	19.8655	19.6506	19.6211	19.2611	18.951	18.7848	18.2651	17.29	16.4233	14.6791	NaN	NaN	NaN	NaN	NaN	NaN	NaN	NaN	NaN	NaN	NaN	NaN	NaN	NaN	NaN	17.7467
18	19.4874	19.0006	18.8368	18.3907	17.4833	16.6086	15.4876	14.9507	14.3199	13.328	12.509	12.2427	12.2676	12.038	12.5961	NaN	NaN	NaN	NaN	20.3641	21.3378	NaN	20.3464	20.0341	19.7265	19.5027	18.8775	18.0104	17.3635	16.5961	15.0258	13.8658	12.6835	NaN	NaN	NaN	NaN	NaN	NaN	NaN	NaN	NaN	NaN	NaN	NaN	NaN	NaN	16.1269	16.9226
14	16.5158	15.3348	14.729	13.8165	12.9347	11.9806	11.6969	11.7601	11.7285	11.6705	11.6956	11.8136	12.1285	12.0986	12.082	12.0215	12.6442	NaN	NaN	NaN	19.1282	18.7631	18.4085	18.0121	17.6716	16.7829	15.9609	14.9426	14.0198	13.5174	12.4214	11.9234	11.9485	NaN	NaN	NaN	NaN	NaN	NaN	NaN	NaN	NaN	NaN	NaN	NaN	NaN	15.2188	15.8488	16.1911
10	11.7669	11.2466	10.9545	10.8264	10.5631	10.5154	10.7461	11.2073	11.0295	11.0126	11.1349	11.392	11.4177	11.8411	11.7941	11.9222	12.3248	12.5808	13.4141	NaN	16.9228	NaN	NaN	NaN	14.4262	13.7616	11.7975	10.9301	10.9823	11.3189	11.3262	11.7023	12.2712	NaN	NaN	NaN	NaN	NaN	NaN	NaN	NaN	NaN	NaN	NaN	NaN	NaN	15.3596	15.1852	14.529
6	13.1506	12.7696	12.4452	13.1625	12.3523	11.7535	12.0871	12.3727	12.0014	11.8185	11.7605	11.8122	11.8069	12.2242	12.6102	12.374	12.674	13.3309	13.7304	13.831	NaN	NaN	NaN	NaN	NaN	NaN	12.2643	10.9917	11.0872	11.5246	11.9788	12.4362	12.9385	NaN	NaN	NaN	NaN	NaN	NaN	NaN	NaN	NaN	NaN	NaN	NaN	NaN	14.1369	13.3857	13.3682
2	15.708	14.6714	14.0572	14.3962	13.6181	13.4398	13.6126	13.4789	13.3976	13.4058	13.3146	13.2374	13.4923	13.8312	14.0296	13.9307	14.3724	15.1651	14.9055	14.5247	NaN	NaN	NaN	NaN	NaN	NaN	14.6092	13.6926	12.4805	12.5715	13.0064	13.4161	13.5377	13.7763	13.7701	13.977	14.1931	14.3888	NaN	NaN	NaN	NaN	NaN	NaN	NaN	13.1366	13.1858	13.5467	13.8199
-2	17.4398	15.8342	15.9146	15.5099	14.8336	14.584	13.9514	13.7088	13.5695	13.5036	13.4269	13.397	13.4844	14.0284	14.194	14.0921	14.506	15.7739	15.6377	15.5443	NaN	NaN	NaN	NaN	NaN	NaN	NaN	NaN	13.7385	12.6732	12.8865	13.3406	13.1591	13.3667	13.5488	13.851	14.1185	14.4876	NaN	NaN	NaN	NaN	NaN	NaN	NaN	12.9323	13.1583	13.7674	13.9804
-6	20.6739	19.1964	19.4168	19.2034	18.9145	18.2729	17.4065	16.725	16.3019	15.2936	14.0906	13.6743	13.2082	13.4691	14.0229	13.6613	14.4747	15.0999	15.323	NaN	NaN	NaN	NaN	NaN	NaN	NaN	NaN	NaN	NaN	13.6491	12.8637	12.9176	12.4295	12.5492	12.7622	13.2754	13.7658	14.2694	NaN	NaN	NaN	NaN	NaN	NaN	13.0544	12.2752	12.5496	12.6984	12.6163
-10	20.8571	20.9264	21.1067	21.4304	21.5665	21.1388	20.9446	20.9628	20.6587	19.7916	18.3365	17.0358	15.9036	15.0673	15.2173	14.2283	14.7372	14.778	14.9835	15.5395	NaN	NaN	NaN	NaN	NaN	NaN	NaN	NaN	NaN	16.3823	14.9979	14.9078	13.9918	13.3314	12.943	13.0043	13.4262	13.7783	13.7697	NaN	NaN	NaN	NaN	NaN	16.3151	15.0902	13.8274	13.8523	13.0501
-14	21.6877	22.0908	22.0512	22.0464	22.0502	22.1046	22.0376	22.2358	22.2425	22.2188	21.7464	20.9402	20.4585	19.9427	19.2084	17.756	17.115	16.4142	15.4459	15.4645	15.5819	NaN	NaN	NaN	NaN	NaN	NaN	NaN	NaN	18.6168	17.8701	17.4754	16.2415	15.0081	14.2391	13.7827	13.5185	13.2351	NaN	NaN	NaN	NaN	NaN	NaN	18.3142	NaN	17.376	17.6933	17.6119
-18	21.6415	21.8651	22.1581	22.0081	22.0509	22.2187	22.0373	22.1043	22.1974	21.9365	21.6144	21.5483	21.4817	21.7933	21.4309	20.7157	19.7441	18.3463	16.2846	15.2382	15.4954	NaN	NaN	NaN	NaN	NaN	NaN	NaN	17.7339	19.4039	19.7428	18.6612	17.6202	16.7319	15.6392	15.4003	14.7786	14.02	NaN	NaN	NaN	NaN	NaN	NaN	16.9393	NaN	19.9479	20.2065	20.1156
-22	20.5818	20.5036	20.5192	20.6514	21.0562	20.9879	20.83	20.8746	20.4724	20.3572	20.8501	21.2218	21.5089	21.6842	21.6837	21.1908	20.5321	19.3424	17.3702	14.9459	14.3291	14.9247	NaN	NaN	NaN	NaN	NaN	NaN	18.8433	19.081	19.8191	18.6835	17.9535	17.6265	16.8762	16.5123	15.8874	14.6871	13.2528	NaN	NaN	NaN	NaN	16.6821	17.0228	NaN	19.9717	19.9083	19.7852
-26	18.9894	18.7659	18.5584	19.1108	19.1949	18.5477	18.9036	19.013	18.3288	18.8364	19.535	19.5554	19.9716	20.4691	20.1603	20.3095	19.0448	18.2808	16.6737	14.2707	13.5172	14.2901	NaN	NaN	NaN	NaN	NaN	18.2131	18.6447	18.1496	18.8762	18.1929	17.7992	17.4506	17.2175	16.7407	16.2989	15.4349	13.2808	NaN	NaN	NaN	NaN	16.4944	17.7899	18.5814	17.8916	17.8441	17.6523
-30	16.8741	16.9881	17.0134	17.0469	17.462	16.6313	17.1235	17.1988	17.1929	17.6733	17.6807	17.4657	17.3852	18.1821	17.8852	18.1911	17.8188	16.9372	16.3682	14.2887	12.6786	NaN	NaN	NaN	NaN	NaN	17.4744	18.2374	17.8296	17.6961	18.2422	17.3718	17.1651	17.1156	17.0138	16.6863	16.4161	16.0174	14.2489	NaN	NaN	NaN	NaN	17.7547	18.0926	17.4984	16.9236	16.6168	15.9426
-34	15.4014	14.6742	14.672	14.8923	15.009	14.9813	15.0331	15.3385	15.4905	15.3742	15.186	15.4952	14.8446	14.8172	15.2911	14.8385	14.8815	14.694	14.4332	13.0383	12.0222	NaN	NaN	NaN	NaN	NaN	17.5697	17.1673	17.1581	17.0795	16.7169	16.207	16.3029	16.1727	15.8813	15.4701	16.0951	15.8624	15.0509	NaN	NaN	NaN	19.1448	18.2922	17.784	17.3577	17.2175	16.742	15.8188
-38	14.5413	13.3825	12.4575	12.2112	11.8504	11.7989	11.7844	12.3545	12.5268	12.3781	12.1118	12.1823	11.4846	11.7931	11.4727	10.6396	10.7043	11.1982	11.7398	11.4539	11.3715	NaN	NaN	NaN	NaN	13.8456	15.3666	14.4361	15.1998	15.5525	15.1576	14.4583	14.0078	13.9598	13.583	12.322	12.3611	12.4322	13.5607	14.6231	15.6298	15.937	17.9896	17.0848	15.9987	15.9543	16.7277	17.265	15.9091
-42	12.9087	12.8424	11.8246	11.0248	10.5229	10.4402	10.4056	11.0034	10.4618	10.2363	9.88603	9.49836	9.4432	9.71897	9.29968	8.76298	8.68343	8.79873	9.11788	9.72595	10.4559	NaN	NaN	NaN	5.22818	10.3402	10.5141	9.48643	10.1522	11.017	11.3982	11.3402	10.3788	11.1676	10.9703	10.0989	9.29776	9.10834	11.0919	12.2852	12.4593	11.5666	11.4574	10.8108	10.1871	9.88519	10.1194	13.8117	14.3503
-46	9.9844	10.8229	11.0932	11.0009	10.4711	10.0566	10.2769	10.9846	9.79567	9.07334	8.7709	8.49373	8.27074	8.40242	8.34218	8.24328	8.26614	7.7798	8.29783	8.7242	9.29463	NaN	NaN	NaN	5.75163	7.787	8.09171	7.24183	7.49696	7.08346	6.31845	6.4662	6.20116	6.38155	6.23108	6.71007	6.47385	6.16217	6.85617	6.65397	6.73751	7.13764	7.45009	5.85732	5.7303	5.16399	4.69098	6.89097	7.61227
-50	8.67099	9.18044	9.38762	9.69979	9.57308	9.01057	9.09412	9.12232	7.66505	8.00269	8.47724	7.94497	7.60886	8.02647	8.17344	8.03656	7.83842	7.36247	7.60833	7.18926	8.2345	NaN	NaN	NaN	6.40707	5.52237	5.05687	4.26033	4.11894	3.78895	3.5501	3.65372	3.75763	3.47843	3.08766	3.37786	3.42488	3.18577	3.22173	3.13806	3.31868	3.83606	4.04451	3.7334	3.38954	3.78333	3.98496	3.4768	3.73654
-54	7.77574	7.66002	7.34166	6.92923	6.42894	5.45627	5.24643	5.45289	5.01875	5.27502	6.3073	6.24189	6.68272	7.58327	7.25769	6.69577	6.58053	6.79932	6.69539	6.53104	7.03216	NaN	NaN	6.09067	5.73114	4.51966	3.41932	2.90234	2.70969	2.52215	2.42062	2.4341	2.51153	2.60411	2.8073	2.95201	2.9446	2.57832	2.16948	2.16442	2.29987	2.39421	2.20893	2.24555	2.25945	2.53936	2.65695	2.40473	2.56551
-58	5.62476	5.47123	4.8456	4.28054	3.47126	2.39954	2.33164	2.96887	3.12116	2.95786	3.49715	3.76837	3.95005	4.02229	4.13651	4.53311	4.71159	4.88054	5.46578	5.48934	5.32416	5.34638	4.74656	3.98573	3.47977	2.77014	2.38184	2.38056	2.38151	2.33483	2.0919	2.28725	2.39413	2.34544	2.66155	3.11141	3.42724	2.99734	2.11919	2.11943	2.38542	2.24734	2.00108	2.45456	2.85709	2.74306	2.85711	2.97091	2.74727
-62	3.38884	3.34111	3.19123	2.78778	2.44472	2.16399	2.22137	2.51119	2.70447	2.47535	2.35502	2.63233	2.70282	2.54392	2.70528	2.88584	2.87569	2.93255	3.00228	3.16451	3.11523	3.05453	2.77572	NaN	NaN	0.639462	0.889632	1.27509	1.40145	1.60634	1.62186	1.76955	1.95411	2.11432	2.36333	2.65758	2.65207	2.63023	2.73004	3.12125	3.01389	2.63967	2.32225	3.11661	3.14002	2.6223	2.61494	3.08722	3.24712
-66	3.29763	3.37476	3.52939	2.95458	2.32541	2.33888	2.38192	2.38611	2.29792	2.1609	2.15849	2.41271	2.48971	2.38164	2.20977	1.81316	1.75485	2.06492	2.47753	2.85148	2.89267	2.67589	1.77207	NaN	-1.31929	-0.336745	0.430022	1.00407	1.26142	1.57864	1.74028	2.03072	2.43806	2.72155	2.71329	2.52556	2.26078	2.07935	2.22323	2.90655	3.12491	2.65448	1.57565	1.39746	0.706598	-0.0714208	NaN	NaN	1.17734
-70	2.56033	2.53633	2.16107	1.4649	1.57493	2.1019	2.33961	2.22327	1.89667	1.75708	1.78286	1.78879	1.81793	2.07243	2.36872	2.36517	2.06671	1.88282	1.94155	2.10797	1.81585	NaN	NaN	NaN	NaN	-0.669551	0.0184418	0.520696	0.720416	1.05557	1.00913	0.749869	0.326578	NaN	NaN	NaN	NaN	NaN	NaN	NaN	NaN	NaN	NaN	NaN	NaN	NaN	NaN	NaN	NaN
-74	0.635903	0.670842	0.478642	0.255742	0.228242	0.460565	NaN	NaN	NaN	NaN	NaN	NaN	NaN	2.42653	4.37903	5.32063	NaN	NaN	NaN	NaN	NaN	NaN	NaN	NaN	-1.42967	-1.39727	-1.20557	-1.12567	-1.11968	-1.21921	NaN	NaN	NaN	NaN	NaN	NaN	NaN	NaN	NaN	NaN	NaN	NaN	NaN	NaN	NaN	NaN	NaN	NaN	NaN
-78	-1.24436	-1.15736	-1.35206	-1.52726	NaN	NaN	NaN	NaN	NaN	NaN	NaN	NaN	NaN	NaN	NaN	NaN	NaN	NaN	NaN	NaN	NaN	NaN	NaN	NaN	NaN	NaN	NaN	-1.68037	-1.66657	NaN	NaN	NaN	NaN	NaN	NaN	NaN	NaN	NaN	NaN	NaN	NaN	NaN	NaN	NaN	NaN	NaN	NaN	NaN	NaN
-82	NaN	NaN	NaN	NaN	NaN	NaN	NaN	NaN	NaN	NaN	NaN	NaN	NaN	NaN	NaN	NaN	NaN	NaN	NaN	NaN	NaN	NaN	NaN	NaN	NaN	NaN	NaN	NaN	NaN	NaN	NaN	NaN	NaN	NaN	NaN	NaN	NaN	NaN	NaN	NaN	NaN	NaN	NaN	NaN	NaN	NaN	NaN	NaN	NaN
-86	NaN	NaN	NaN	NaN	NaN	NaN	NaN	NaN	NaN	NaN	NaN	NaN	NaN	NaN	NaN	NaN	NaN	NaN	NaN	NaN	NaN	NaN	NaN	NaN	NaN	NaN	NaN	NaN	NaN	NaN	NaN	NaN	NaN	NaN	NaN	NaN	NaN	NaN	NaN	NaN	NaN	NaN	NaN	NaN	NaN	NaN	NaN	NaN	NaN
[truncated: 23 more columns]

[truncated: 23 more sheets: 250.0 m, 300.0 m, 400.0 m, 500.0 m, 600.0 m, 700.0 m, 800.0 m, 900.0 m, 1000.0 m, 1100.0 m, 1200.0 m, 1300.0 m, 1400.0 m, 1500.0 m, 1750.0 m, 2000.0 m, 2500.0 m, 3000.0 m, 3500.0 m, 4000.0 m …]
