# Supplementary material for: Pliocene Model Intercomparison Project (PlioMIP): experimental design and boundary conditions (Experiment 2)
Source: Copernicus journal article supplement (doi:10.5194/gmd-4-571-2011), 2011-07-01
Supplement: Supplementary file 2 [file gmd-4-571-2011-supplement.zip › PlioMIP_exp2_version1/exp2_alternate/key_to_vegetation_values.html]

Key to Biome and Megabiome Vegetation Data Values

**Key to BIOME data values**

(Prentice et al., 2000, http://pmip2.lsce.ipsl.fr/synth/vegmaps.shtml)

|  |  |
| --- | --- |
| 0 | sea |
| 1 | tropical evergreen forest |
| 2 | tropical semi-deciduous forest |
| 3 | tropical deciduous forest/woodland |
| 4 | temperate deciduous forest |
| 5 | temperate conifer forest |
| 6 | warm-temperate mixed forest |
| 7 | cool mixed forest |
| 8 | cool conifer forest |
| 9 | cold mixed forest |
| 10 | evergreen taiga/montane forest |
| 11 | deciduous taiga/montane forest |
| 12 | tropical savanna |
| 13 | tropical xerophytic shrubland |
| 14 | temperate xerophytic shrubland |
| 15 | temperate sclerophyll woodland |
| 16 | temperate broadleaved savanna |
| 17 | open conifer woodland |
| 18 | boreal parkland |
| 19 | tropical grassland |
| 20 | temperate grassland |
| 21 | desert |
| 22 | steppe tundra |
| 23 | shrub tundra |
| 24 | dwarf-shrub tundra |
| 25 | prostrate shrub tundra |
| 26 | cushion-forb, lichen, moss tundra |
|  |
| 28 | land ice |

**Key to MEGABIOME data values**

(after Harrison & Prentice 2003,http://pmip2.lsce.ipsl.fr/synth/mbmaps.shtml)

|  |  |
| --- | --- |
| 0 | sea |
| 1 | tropical forest |
| 2 | warm-temperate forest |
| 3 | savanna and dry woodland |
| 4 | grassland and dry shrubland |
| 5 | desert |
| 6 | temperate forest |
| 7 | boreal forest |
| 8 | tundra |
| 9 | dry tundra |
|  |
| 28 | land ice |
