# Supplementary material for: Pliocene Model Intercomparison Project (PlioMIP): experimental design and boundary conditions (Experiment 2)
Source: Copernicus journal article supplement (doi:10.5194/gmd-4-571-2011), 2011-07-01
Supplement: Supplementary file 2 [file gmd-4-571-2011-supplement.zip › PlioMIP_exp2_version1/exp2_alternate/lev_94_dec_1.xls]

## Sheet: 0.0 m
	-177.5	-172.5	-167.5	-162.5	-157.5	-152.5	-147.5	-142.5	-137.5	-132.5	-127.5	-122.5	-117.5	-112.5	-107.5	-102.5	-97.5	-92.5	-87.5	-82.5	-77.5	-72.5	-67.5	-62.5	-57.5	-52.5	-47.5	-42.5	-37.5	-32.5	-27.5	-22.5	-17.5	-12.5	-7.5	-2.5	2.5	7.5	12.5	17.5	22.5	27.5	32.5	37.5	42.5	47.5	52.5	57.5	62.5
86	-1.5298	-1.5392	-1.5443	-1.5566	-1.5777	-1.5945	-1.6118	-1.6296	-1.6482	-1.664	-1.6784	-1.6747	-1.6623	-1.6428	-1.6045	-1.5557	-1.5039	-1.4565	-1.4193	-1.3384	-1.2951	-1.2687	-1.2517	-1.2449	-1.278	-1.3281	-1.3491	-1.403	-1.443	-1.4684	-1.4984	-1.5499	-1.5778	-1.5662	-1.5632	-1.5602	-1.5371	-1.5488	-1.591	-1.6038	-1.6688	-1.7466	-1.8186	-1.8337	-1.8153	-1.7618	-1.7353	-1.6371	-1.5487
82	-1.7192	-1.7167	-1.7119	-1.6941	-1.673	-1.6509	-1.6263	-1.5998	-1.5675	-1.5446	-1.5641	-1.5887	-1.607	-1.6152	-1.526	-1.3879	-1.1895	-0.9772	-1.2386	NaN	NaN	NaN	NaN	NaN	NaN	-0.8375	NaN	NaN	NaN	NaN	NaN	-1.7165	-1.8062	-1.6683	-1.4697	-1.2386	-0.9807	-0.7824	-0.6487	-0.8488	-1.3226	-1.8577	-2.229	-2.4327	-2.4888	-2.5268	-2.534	-2.2556	-2.0515
78	-1.4521	-1.4504	-1.5546	-1.6797	-1.7589	-1.8094	-1.8113	-1.7037	-1.4695	-1.1908	-1.0898	-1.1188	-1.1801	NaN	-1.8355	-2.2078	-2.5731	-2.4029	NaN	NaN	-1.3758	-1.7958	NaN	NaN	NaN	NaN	NaN	NaN	NaN	NaN	NaN	NaN	-2.7097	-2.2256	-1.893	-1.1153	-0.1406	0.661	1.2301	NaN	NaN	-0.4119	-0.6005	-0.7019	-0.9125	-1.2221	-1.6624	-2.0156	-2.0477
74	-1.6174	-1.3583	-1.4072	-1.5463	-1.5343	-1.5986	-1.78	-1.7379	-1.3783	-1.0033	-0.9671	-0.5176	0.2174	-1.0948	-1.407	-1.6063	-1.9776	-1.5954	-0.9827	-0.4256	-0.3946	-0.1744	-0.4369	-0.7697	-1.1161	NaN	NaN	NaN	NaN	NaN	NaN	NaN	-2.3134	-1.9596	-1.0768	0.6969	2.2645	3.2261	3.6387	3.5852	3.3785	3.1675	2.7704	2.2681	1.8755	1.5377	1.0439	NaN	-0.1735
70	-0.6612	-0.1313	0.3894	0.1025	NaN	NaN	-1.1732	-1.1825	-0.1719	-0.3769	-0.6077	-0.4226	1.5839	NaN	NaN	NaN	NaN	NaN	NaN	NaN	0.2045	NaN	-1.1637	-0.9021	-0.5281	NaN	NaN	NaN	NaN	NaN	NaN	0.2562	-0.1289	0.2154	1.6662	3.8984	5.6454	6.2538	6.331	6.9409	NaN	NaN	5.0578	3.9325	3.4039	3.6645	3.9448	3.2167	1.5636
66	NaN	NaN	1.0249	NaN	NaN	NaN	NaN	NaN	NaN	NaN	NaN	NaN	NaN	NaN	NaN	NaN	NaN	NaN	NaN	-0.7384	-0.1272	NaN	NaN	-1.6233	-0.2049	NaN	NaN	NaN	3.2299	4.2839	4.5752	3.9457	3.1264	4.4375	4.3501	5.9047	7.2821	7.6361	6.822	NaN	NaN	NaN	NaN	NaN	NaN	NaN	NaN	NaN	NaN
62	2.7707	2.3498	3.185	NaN	NaN	NaN	NaN	NaN	NaN	NaN	NaN	NaN	NaN	NaN	NaN	NaN	NaN	2.2468	2.8456	2.3926	1.6935	1.8296	-0.6231	-0.2998	1.231	1.6496	NaN	NaN	6.2891	7.0919	7.7726	8.6012	9.0809	8.591	8.2605	8.141	8.4117	NaN	NaN	NaN	NaN	NaN	NaN	NaN	NaN	NaN	NaN	NaN	NaN
58	4.3041	4.1854	4.3658	4.6292	NaN	6.0828	6.6489	7.1961	7.5416	NaN	NaN	NaN	NaN	NaN	NaN	NaN	NaN	4.8614	3.2374	4.0389	NaN	NaN	NaN	NaN	1.4228	3.2603	3.781	4.801	6.4724	7.9011	8.9262	9.6083	10.0402	10.3373	10.5719	9.9487	8.9285	8.5562	NaN	6.4002	7.274	NaN	NaN	NaN	NaN	NaN	NaN	NaN	NaN
54	4.8402	5.0703	5.3369	5.8127	6.0679	6.1382	6.5239	7.3506	8.1663	8.5297	NaN	NaN	NaN	NaN	NaN	NaN	NaN	NaN	NaN	5.1834	NaN	NaN	NaN	NaN	0.0521	2.3263	5.4459	6.8211	7.1227	8.5368	10.1149	11.0479	11.45	11.1118	NaN	NaN	9.5981	9.2363	7.0729	NaN	NaN	NaN	NaN	NaN	NaN	NaN	NaN	NaN	NaN
50	5.9292	6.0789	5.9999	6.327	6.6921	7.0189	7.4105	8.1988	9.2391	10.011	9.7012	NaN	NaN	NaN	NaN	NaN	NaN	NaN	NaN	NaN	NaN	NaN	NaN	3.2699	NaN	2.2018	5.6962	10.2833	11.1164	11.2302	12.0335	12.4779	12.8521	12.376	11.801	12.091	NaN	NaN	NaN	NaN	NaN	NaN	NaN	NaN	NaN	NaN	NaN	NaN	NaN
46	7.8688	7.7254	7.8043	8.4059	8.9027	9.3756	9.7634	10.325	11.0819	11.7196	11.7086	NaN	NaN	NaN	NaN	NaN	NaN	NaN	NaN	NaN	NaN	NaN	NaN	5.756	6.2246	5.0479	6.9085	13.5029	14.9546	14.4745	14.5085	14.3018	14.122	13.9572	13.8013	13.7806	NaN	NaN	NaN	NaN	NaN	NaN	NaN	NaN	NaN	NaN	NaN	NaN	NaN
42	11.5826	11.4348	11.1295	11.4388	11.7868	12.1148	12.8508	13.4308	14.0137	14.0122	13.011	NaN	NaN	NaN	NaN	NaN	NaN	NaN	NaN	NaN	NaN	NaN	10.7587	13.4509	15.1634	13.9578	14.8881	18.3354	17.5698	17.0374	16.6351	16.4337	15.993	15.6229	NaN	NaN	15.8815	16.3041	16.5482	15.6466	NaN	NaN	NaN	NaN	NaN	NaN	NaN	NaN	NaN
38	15.563	15.2374	14.836	14.9988	15.4596	15.4901	15.9607	16.254	16.5231	16.26	14.8397	12.7943	NaN	NaN	NaN	NaN	NaN	NaN	NaN	NaN	NaN	17.0421	20.3885	21.651	21.8941	21.1848	20.5404	20.2023	19.407	18.8855	18.4173	18.47	18.2297	17.7117	NaN	NaN	17.8899	18.0054	17.995	18.2634	NaN	NaN	NaN	NaN	NaN	NaN	NaN	NaN	NaN
34	18.7382	18.4338	18.0789	18.3259	18.8563	18.952	19.1367	19.0539	18.6946	18.061	16.8553	15.3542	NaN	NaN	NaN	NaN	NaN	NaN	NaN	NaN	22.7997	22.4664	22.6437	22.3766	22.1458	21.784	21.578	21.3694	21.1019	20.8105	20.5362	20.2196	19.7955	19.2808	19.0161	NaN	NaN	NaN	20.0696	19.9792	19.5935	19.8737	20.8668	NaN	NaN	NaN	NaN	NaN	NaN
30	21.808	21.6144	21.2916	21.5226	22.1526	22.0447	21.7151	21.1269	20.4342	19.587	18.7206	17.9075	17.6466	NaN	NaN	NaN	NaN	NaN	22.9792	NaN	24.5616	23.7924	23.5338	23.5535	23.4765	23.4149	23.2711	22.9696	22.8155	22.4905	22.1237	21.552	21.0038	19.7828	NaN	NaN	NaN	NaN	NaN	NaN	NaN	NaN	NaN	NaN	NaN	NaN	NaN	NaN	NaN
26	24.5314	24.4187	24.0823	23.8934	24.1094	23.7719	23.2504	22.533	21.5765	20.7476	20.3651	19.9722	19.8377	22.3725	NaN	NaN	22.7005	24.5229	25.2792	24.5663	25.8911	25.5923	25.631	25.7344	25.5448	25.1583	24.9505	24.7238	24.3623	23.9177	23.3053	22.7732	21.2984	NaN	NaN	NaN	NaN	NaN	NaN	NaN	NaN	NaN	NaN	NaN	NaN	NaN	26.6878	26.5194	NaN
22	25.916	25.8026	25.6082	25.4941	25.1779	24.5778	24.0819	23.5842	22.8006	22.5667	22.1086	21.8516	22.3274	24.4159	26.3008	NaN	26.0569	26.0787	26.4388	27.4375	27.084	27.113	27.0042	26.9987	26.5807	26.1476	25.9649	25.6003	25.1796	24.7582	24.1341	23.1501	19.4276	NaN	NaN	NaN	NaN	NaN	NaN	NaN	NaN	NaN	NaN	27.8311	NaN	NaN	NaN	NaN	26.553
18	26.9266	26.7643	26.5712	26.2858	25.8542	25.409	25.1413	24.9181	24.6545	24.5898	24.2596	24.4573	25.1529	26.2997	27.511	28.8155	NaN	NaN	27.5551	27.7489	28.0426	28.0228	27.7061	27.4719	27.11	26.8189	26.4945	26.1712	25.7578	25.4396	24.8903	24.4056	22.3353	NaN	NaN	NaN	NaN	NaN	NaN	NaN	NaN	NaN	NaN	NaN	NaN	NaN	NaN	26.4045	26.8201
14	27.402	27.2054	26.9606	26.7089	26.3128	26.25	26.1749	25.9552	25.9512	25.9461	25.9996	26.1346	26.8925	27.4004	27.968	28.6162	27.7764	28.2539	NaN	28.0119	28.0042	27.7744	27.843	27.7266	27.606	27.2524	26.9296	26.6992	26.4854	26.3187	25.9727	26.192	25.4247	NaN	NaN	NaN	NaN	NaN	NaN	NaN	NaN	NaN	NaN	NaN	27.6003	26.8218	26.4741	26.5135	26.5289
10	28.1099	27.8284	27.5995	27.507	27.2603	27.2957	27.1279	26.9748	27.0747	26.9118	26.9374	26.8305	27.2324	27.4761	27.6409	27.5791	27.0906	27.0951	26.7142	27.9038	28.055	NaN	NaN	NaN	27.9323	27.7432	27.5404	27.0613	27.0935	26.9792	27.0963	27.4999	27.422	NaN	NaN	NaN	NaN	NaN	NaN	NaN	NaN	NaN	NaN	NaN	NaN	NaN	26.4779	27.0264	27.2293
6	28.8537	28.7404	28.5016	28.0083	27.9476	28.0165	27.7538	27.8312	27.4233	27.5597	27.369	26.6583	26.8255	26.9198	26.9948	26.6541	26.9354	26.8093	26.7889	27.112	27.0655	NaN	NaN	NaN	NaN	27.4411	27.6033	27.5214	27.5845	27.4949	27.7258	28.0476	28.0795	28.3608	NaN	NaN	28.0835	NaN	NaN	NaN	NaN	NaN	NaN	NaN	NaN	NaN	27.1474	27.6687	28.2721
2	28.3992	28.5123	28.1455	27.5442	27.0862	26.9975	26.7741	26.8424	25.9574	26.1683	25.513	24.4935	24.2947	24.6862	24.9718	24.4143	24.8011	25.0785	25.4019	25.674	NaN	NaN	NaN	NaN	NaN	NaN	27.5201	27.4866	27.4064	27.2469	27.085	27.0636	26.4734	26.8892	26.8947	27.4566	27.7915	27.8026	NaN	NaN	NaN	NaN	NaN	NaN	NaN	27.195	27.612	27.9429	28.4177
-2	28.5942	28.3683	28.0195	27.8807	27.2185	26.9855	26.6633	26.3044	25.6668	25.4264	24.6343	23.038	23.4555	23.3795	23.3447	22.6025	22.129	22.0036	22.4785	22.0848	NaN	NaN	NaN	NaN	NaN	NaN	NaN	26.8054	26.9131	26.782	26.3423	26.1162	25.3302	25.2339	25.4213	26.0208	26.5386	26.6578	NaN	NaN	NaN	NaN	NaN	NaN	27.6161	27.8814	28.1291	28.2393	28.4782
-6	29.4129	29.1653	28.964	28.8745	28.4839	28.4362	27.7257	27.2006	26.7527	26.6904	25.8235	24.8472	24.871	24.241	24.3277	23.375	22.347	22.4746	22.3094	20.1985	NaN	NaN	NaN	NaN	NaN	NaN	NaN	NaN	NaN	26.871	26.4685	25.9457	25.1945	24.8382	24.5774	24.4356	25.0077	26.1794	NaN	NaN	NaN	NaN	NaN	NaN	27.808	28.2879	28.1299	28.2511	28.1847
-10	29.2879	29.2383	29.1198	29.0269	28.9926	28.8369	28.4762	28.0696	27.5088	27.0949	26.7165	26.0606	25.4482	24.782	24.1221	23.1042	22.1006	21.9037	21.6929	20.9474	NaN	NaN	NaN	NaN	NaN	NaN	NaN	NaN	NaN	26.9323	26.3327	25.6829	25.0344	24.1577	23.2695	22.8555	22.9816	24.3827	25.446	NaN	NaN	NaN	NaN	NaN	27.4132	27.4888	27.6073	27.7397	27.5263
-14	28.4569	28.3985	28.5171	28.5258	28.2888	28.1727	28.268	28.1168	27.5799	27.0945	26.7329	25.9604	24.7037	24.3669	23.2671	22.616	21.924	21.1363	20.6206	20.5958	18.701	NaN	NaN	NaN	NaN	NaN	NaN	NaN	26.8874	26.5391	25.608	24.2319	24.1792	23.2979	22.1282	21.3394	21.0958	21.6017	23.0794	NaN	NaN	NaN	NaN	NaN	27.8627	27.5929	26.9027	26.8808	26.7577
-18	26.8606	27.0018	27.2193	26.873	26.9879	27.0539	27.0842	26.9461	26.8158	26.6166	26.1252	25.0388	23.8032	23.6666	22.796	22.9132	21.8216	21.1688	20.368	19.4303	19.2185	20.0948	NaN	NaN	NaN	NaN	NaN	NaN	26.2592	26.049	25.0701	23.0957	23.2771	22.7073	21.8815	20.8923	20.0432	19.2913	NaN	NaN	NaN	NaN	NaN	27.1591	27.6341	NaN	26.4011	25.9202	25.6202
-22	25.0695	25.147	24.8997	24.6905	25.0426	24.9037	24.9752	25.0874	25.44	25.1389	24.0821	23.4008	23.4623	23.2724	23.3387	23.0609	21.7108	20.924	19.7928	18.4269	18.4175	18.8988	NaN	NaN	NaN	NaN	NaN	NaN	25.1108	25.1282	24.3536	23.4917	23.1713	22.7078	21.4784	20.8388	19.8919	18.9563	16.627	NaN	NaN	NaN	NaN	26.5694	26.7444	NaN	25.4976	25.1665	24.7609
-26	23.1387	22.9451	22.26	22.4068	22.5329	22.4919	22.2917	22.6412	23.2082	22.9123	22.9221	22.6121	23.0346	22.9342	22.5099	21.5512	21.2898	19.902	19.2707	18.6608	17.692	16.9151	NaN	NaN	NaN	NaN	23.8443	23.4687	23.6163	22.9929	22.3301	22.3099	22.4058	22.5837	21.0986	20.4217	19.9051	18.9648	16.8205	NaN	NaN	NaN	NaN	24.9724	24.8177	24.5342	24.3514	23.8509	23.6667
-30	20.8974	20.2691	20.0599	19.8408	20.9087	20.15	19.8838	20.5154	21.2536	20.9553	20.7988	21.2299	21.5028	21.247	20.7578	19.897	19.9891	18.6306	17.9454	18.1416	17.0804	15.8158	NaN	NaN	NaN	NaN	22.1652	21.547	21.1435	20.6676	20.2034	20.2015	20.0904	20.7326	20.3195	19.5905	19.4285	18.8886	18.0954	NaN	NaN	NaN	23.7437	22.7048	22.4596	22.2977	22.2674	21.6271	21.2979
-34	18.7107	17.8051	17.575	17.0489	17.6733	17.1765	17.3636	17.6649	17.7395	17.591	17.7981	17.9724	17.1328	17.9971	18.1508	17.8117	17.5779	16.963	16.6667	17.1068	16.5413	14.8556	NaN	NaN	NaN	19.3472	19.9834	18.7719	18.5896	18.3672	18.0019	18.0935	18.1626	18.4462	17.8457	17.2819	17.4056	17.4996	18.2042	17.906	20.1984	21.8167	21.2066	19.6636	19.45	19.2392	19.5467	19.4422	18.5286
-38	16.8849	15.9568	15.6564	15.6713	15.4343	15.0008	14.8773	14.6736	14.976	15.1073	14.7746	14.4984	14.1539	15.1463	15.4014	14.9675	14.7409	15.1386	15.1742	15.5404	15.2185	NaN	NaN	NaN	13.4686	17.2274	17.7944	15.9088	16.0024	16.0038	15.4085	14.706	14.9033	15.5645	14.8017	14.3256	13.7893	13.1483	16.224	18.9609	19.9404	18.5287	18.7665	18.1875	18.0637	15.46	16.3003	17.2198	16.0096
-42	14.749	14.5537	13.8461	13.3736	13.1066	12.7266	12.7999	12.894	13.1791	12.9722	12.3423	12.2086	11.9745	12.4051	11.699	11.7815	11.5454	11.7218	12.0862	13.2015	13.0872	NaN	NaN	14.0681	11.6562	14.1657	14.1787	11.9857	11.4137	11.9829	11.9945	11.035	11.1608	12.0176	10.7248	10.5307	9.8896	10.2309	12.6487	13.7256	14.9035	13.7275	12.4016	12.3946	11.2437	9.0102	10.653	12.736	12.9378
-46	11.4308	12.0291	12.2784	12.2554	11.2868	10.6642	10.736	11.0906	10.8516	10.375	9.9017	9.6888	8.9714	8.841	8.6199	9.3049	9.2118	8.8782	10.2318	12.107	11.2228	NaN	NaN	10.5254	9.3677	10.8894	10.9	9.485	8.0978	8.0341	7.7462	7.3106	6.9836	6.4135	5.68	6.3612	6.5075	7.3653	7.2932	6.2396	6.7616	7.4222	7.3661	6.49	5.0391	4.4103	4.7782	6.3598	6.8755
-50	9.5796	9.9934	9.9319	9.9573	9.822	9.1756	9.2974	9.6542	9.1719	8.7267	8.3274	8.3983	7.2676	6.7332	7.8149	8.2386	7.6893	6.7673	7.4216	7.7969	9.5536	NaN	8.8955	8.2276	7.4419	6.9482	6.2423	4.8685	3.9014	3.5409	3.5751	3.498	3.4649	2.9706	2.5026	2.5975	2.8117	2.9796	2.484	2.0128	2.32	2.791	2.9454	3.1509	2.4615	2.728	3.3252	2.8162	2.6728
-54	7.5898	7.7352	7.6843	6.863	6.4827	5.7719	5.2717	5.5642	5.7449	5.72	6.1782	6.4803	6.4574	6.7831	7.197	6.9474	6.3944	5.8378	5.6595	6.194	7.3476	7.8587	7.6163	6.4984	5.9141	4.7104	2.9458	1.5747	1.0681	0.4522	0.5557	0.8932	0.9858	1.0492	0.7105	0.4303	-0.1857	-0.3513	-0.5992	-0.6919	-0.2618	0.1312	0.3402	0.8703	0.7345	0.9903	1.522	0.7367	1.0327
-58	4.7542	4.217	3.7348	3.9772	2.7095	1.6716	1.0828	1.6897	2.5799	2.895	3.3109	3.698	3.8249	3.7164	4.0958	4.8184	4.8562	4.6086	4.9182	5.1217	4.9939	4.9162	3.8446	2.8287	2.3186	1.5743	0.8922	0.2961	-0.2037	-0.6597	-0.7043	-0.5005	-0.5568	-0.8216	-0.9152	-0.7829	-1.3127	-1.6669	-1.3094	-1.6348	-1.1292	-0.9575	-0.9835	-0.8389	-0.2501	0.1763	0.1153	-0.5647	-0.4124
-62	1.804	1.4046	0.8022	0.954	0.2364	-0.369	-0.5119	-0.1379	0.2014	0.23	0.7842	1.6284	1.6104	1.2799	1.526	2.1055	2.0769	1.6257	1.8713	2.0659	1.6597	0.9432	0.0937	-0.1839	-0.3765	-0.6888	-0.628	-0.8245	-1.32	-1.4021	-1.0899	-0.9806	-1.0268	-0.6697	0.1347	-0.0414	-1.1098	-1.433	-1.426	-1.0821	-0.9793	-0.9927	-0.9726	-0.8068	-0.353	-0.0819	-0.4342	-0.6693	-0.7326
-66	-0.4072	-0.0578	0.0024	0.2589	0.106	-0.4597	-1.0622	-1.3463	-1.4417	-1.4212	-1.2262	-1.0288	-1.5099	-1.3678	-1.0361	-0.8595	-0.9297	-0.9741	-0.7628	-0.8225	-0.9014	-0.8905	-0.7823	-0.3079	-1.1474	-1.7951	-1.6517	-1.4101	-1.3403	-1.1783	-0.8578	-0.619	-0.3366	0.1783	0.655	0.1631	-0.4584	-0.3535	-0.2179	-0.4442	-0.6326	-0.8388	-1.2938	-1.0388	-0.7828	-0.916	-0.9765	-0.793	-0.7551
-70	-1.3012	-1.0449	-0.9782	-0.8687	-0.8079	-1.0332	-1.3129	-1.3069	-1.2937	-1.3999	-1.521	-1.5267	-1.3362	-1.2401	-1.2845	-1.3769	-1.8241	-1.5196	-1.1538	-1.0968	-1.1554	NaN	NaN	NaN	-1.6364	-1.9443	-1.5482	-1.2622	-1.0411	-0.8906	-0.7409	-0.5623	-0.3417	-0.1305	0.2572	0.2317	-0.1468	-0.8137	-1.202	-1.1337	-1.0236	-1.2739	NaN	NaN	NaN	NaN	NaN	NaN	NaN
-74	-1.3511	-1.4377	-1.5233	-1.5113	-1.5188	-1.5055	-1.5476	-1.5119	-1.2857	-1.2155	-1.5984	NaN	-1.6458	-0.4408	0.7366	0.1792	NaN	NaN	NaN	NaN	NaN	NaN	NaN	NaN	-1.5404	-1.6214	-1.6478	-1.4635	-1.3011	-1.1565	-0.9819	-0.5242	NaN	NaN	NaN	NaN	NaN	NaN	NaN	NaN	NaN	NaN	NaN	NaN	NaN	NaN	NaN	NaN	NaN
-78	-1.2484	-1.3748	-1.4841	-1.5853	NaN	NaN	NaN	NaN	NaN	NaN	NaN	NaN	NaN	NaN	NaN	NaN	NaN	NaN	NaN	NaN	NaN	NaN	NaN	NaN	NaN	NaN	NaN	-1.5849	-1.4859	NaN	NaN	NaN	NaN	NaN	NaN	NaN	NaN	NaN	NaN	NaN	NaN	NaN	NaN	NaN	NaN	NaN	NaN	NaN	NaN
-82	NaN	NaN	NaN	NaN	NaN	NaN	NaN	NaN	NaN	NaN	NaN	NaN	NaN	NaN	NaN	NaN	NaN	NaN	NaN	NaN	NaN	NaN	NaN	NaN	NaN	NaN	NaN	NaN	NaN	NaN	NaN	NaN	NaN	NaN	NaN	NaN	NaN	NaN	NaN	NaN	NaN	NaN	NaN	NaN	NaN	NaN	NaN	NaN	NaN
-86	NaN	NaN	NaN	NaN	NaN	NaN	NaN	NaN	NaN	NaN	NaN	NaN	NaN	NaN	NaN	NaN	NaN	NaN	NaN	NaN	NaN	NaN	NaN	NaN	NaN	NaN	NaN	NaN	NaN	NaN	NaN	NaN	NaN	NaN	NaN	NaN	NaN	NaN	NaN	NaN	NaN	NaN	NaN	NaN	NaN	NaN	NaN	NaN	NaN
[truncated: 23 more columns]

## Sheet: 10.0 m
	-177.5	-172.5	-167.5	-162.5	-157.5	-152.5	-147.5	-142.5	-137.5	-132.5	-127.5	-122.5	-117.5	-112.5	-107.5	-102.5	-97.5	-92.5	-87.5	-82.5	-77.5	-72.5	-67.5	-62.5	-57.5	-52.5	-47.5	-42.5	-37.5	-32.5	-27.5	-22.5	-17.5	-12.5	-7.5	-2.5	2.5	7.5	12.5	17.5	22.5	27.5	32.5	37.5	42.5	47.5	52.5	57.5	62.5
86	-1.6711	-1.6781	-1.6823	-1.6844	-1.6863	-1.6901	-1.6928	-1.6914	-1.6898	-1.6847	-1.6816	-1.6786	-1.6754	-1.6716	-1.6674	-1.66	-1.6516	-1.6469	-1.6499	-1.6316	-1.6169	-1.6014	-1.5831	-1.5664	-1.5616	-1.5675	-1.5709	-1.5866	-1.6112	-1.6291	-1.632	-1.6519	-1.6709	-1.6635	-1.662	-1.6618	-1.6406	-1.653	-1.6959	-1.7079	-1.7812	-1.8672	-1.9442	-1.9748	-1.9839	-1.9621	-1.9562	-1.894	-1.8373
82	-1.7412	-1.7218	-1.6962	-1.6622	-1.6331	-1.6143	-1.6076	-1.6242	-1.6579	-1.6966	-1.739	-1.7539	-1.7491	-1.7287	-1.6645	-1.6	-1.4944	-1.3901	-1.6952	NaN	NaN	NaN	NaN	NaN	NaN	-1.3514	NaN	NaN	NaN	NaN	NaN	-1.6569	-1.7334	-1.6327	-1.4391	-1.1983	-0.9369	-0.7411	-0.6144	-0.8177	-1.2922	-1.821	-2.1851	-2.3929	-2.4563	-2.4701	-2.4516	-2.17	-1.9267
78	-1.703	-1.6261	-1.6533	-1.7136	-1.7523	-1.7756	-1.7745	-1.7253	-1.5928	-1.4358	-1.4142	-1.445	-1.4355	NaN	-1.8449	-2.0193	-2.309	-2.0752	NaN	NaN	-1.145	-1.5386	NaN	NaN	NaN	NaN	NaN	NaN	NaN	NaN	NaN	NaN	-2.657	-2.1265	-1.719	-0.9429	0.0089	0.7682	1.2494	NaN	NaN	-0.6738	-1.0058	-1.1903	-1.3208	-1.4515	-1.6986	-1.8621	-1.6674
74	-1.5593	-1.3692	-1.4264	-1.5573	-1.5289	-1.5573	-1.744	-1.743	-1.3648	-0.8037	-0.5164	-0.6671	-0.4454	-1.4919	-1.687	-1.7076	-2.0033	-1.489	-0.8402	-0.3212	-0.4006	-0.1044	-0.4681	-0.8228	-1.222	NaN	NaN	NaN	NaN	NaN	NaN	NaN	-2.3335	-1.9287	-0.9815	0.7483	2.2536	3.1669	3.572	3.5086	3.2826	3.022	2.5501	2.0244	1.6382	1.288	0.7651	NaN	-0.5671
70	-0.4167	-0.1138	0.367	-0.1313	NaN	NaN	-1.2431	-1.4748	-0.6975	-0.4739	-0.0489	0.0706	0.8403	NaN	NaN	NaN	NaN	NaN	NaN	NaN	NaN	NaN	-1.3985	-0.8419	-0.4858	NaN	NaN	NaN	NaN	NaN	NaN	0.142	-0.0648	0.3291	1.8631	4.0662	5.6414	6.2176	6.3694	6.9245	NaN	NaN	5.1128	4.0547	3.5374	3.7232	3.2065	2.1991	0.243
66	NaN	NaN	0.9504	NaN	NaN	NaN	NaN	NaN	NaN	NaN	NaN	NaN	NaN	NaN	NaN	NaN	NaN	NaN	NaN	-0.6797	NaN	NaN	NaN	-1.5691	-0.136	NaN	NaN	NaN	3.2035	4.3357	4.6527	4.0539	3.269	4.4626	4.3729	5.8959	7.2537	7.6386	6.9706	NaN	NaN	NaN	NaN	NaN	NaN	NaN	NaN	NaN	NaN
62	2.7821	2.4839	3.0332	NaN	NaN	NaN	NaN	NaN	NaN	NaN	NaN	NaN	NaN	NaN	NaN	NaN	NaN	2.1419	2.6452	2.2348	1.5301	1.7118	-0.7264	-0.2403	1.3419	1.7143	NaN	NaN	6.3679	7.242	8.0347	8.8099	9.158	8.62	8.2259	8.1201	8.4482	NaN	NaN	NaN	NaN	NaN	NaN	NaN	NaN	NaN	NaN	NaN	NaN
58	4.4353	4.1567	4.3554	4.8151	NaN	6.0868	6.6734	7.1983	7.4754	NaN	NaN	NaN	NaN	NaN	NaN	NaN	NaN	4.119	3.2825	3.7092	NaN	NaN	NaN	NaN	1.5366	3.3673	3.855	4.9237	6.6255	8.2121	9.8448	10.4586	10.395	10.5853	10.6877	9.9256	8.9898	8.7633	NaN	6.5971	7.3924	NaN	NaN	NaN	NaN	NaN	NaN	NaN	NaN
54	4.8971	5.1321	5.3855	5.8306	6.1568	6.353	6.724	7.4427	8.1539	8.3989	NaN	NaN	NaN	NaN	NaN	NaN	NaN	NaN	NaN	NaN	NaN	NaN	NaN	NaN	-0.1424	2.3633	5.5256	6.8839	7.1754	8.6429	10.5363	11.4807	11.7184	11.4401	NaN	NaN	9.6435	9.2167	NaN	NaN	NaN	NaN	NaN	NaN	NaN	NaN	NaN	NaN	NaN
50	5.8875	6.0757	6.0221	6.3433	6.6937	7.1518	7.4671	8.2502	9.2735	10.0745	9.7015	NaN	NaN	NaN	NaN	NaN	NaN	NaN	NaN	NaN	NaN	NaN	NaN	3.1239	NaN	2.1735	5.7115	10.2125	11.0395	11.1668	12.0497	12.4484	12.8496	12.4135	11.7154	12.0373	NaN	NaN	NaN	NaN	NaN	NaN	NaN	NaN	NaN	NaN	NaN	NaN	NaN
46	8.2658	7.8605	7.7443	8.2899	8.9368	9.625	9.7906	10.3759	11.1521	11.8288	11.7461	NaN	NaN	NaN	NaN	NaN	NaN	NaN	NaN	NaN	NaN	NaN	NaN	5.6201	6.1962	5.0234	6.8367	13.4329	14.8243	14.2508	14.5977	14.3513	14.221	14.1005	13.8104	13.6543	NaN	NaN	NaN	NaN	NaN	NaN	NaN	NaN	NaN	NaN	NaN	NaN	NaN
42	11.9138	11.5092	11.217	11.5357	11.9381	12.3839	13.0257	13.5777	14.1455	14.0324	12.9667	NaN	NaN	NaN	NaN	NaN	NaN	NaN	NaN	NaN	NaN	NaN	10.7022	13.3811	15.1028	13.8184	14.802	18.2799	17.4723	16.8994	16.7282	16.5769	16.0621	15.6324	NaN	NaN	15.9615	16.267	16.5861	15.7136	NaN	NaN	NaN	NaN	NaN	NaN	NaN	NaN	NaN
38	15.7721	15.3337	15.0491	15.2746	15.6501	15.6025	16.0506	16.4165	16.6148	16.2661	14.7578	12.6012	NaN	NaN	NaN	NaN	NaN	NaN	NaN	NaN	NaN	17.0476	20.3453	21.615	21.8009	21.1245	20.5821	20.2413	19.4309	18.8904	18.4538	18.5795	18.3348	17.7496	NaN	NaN	17.894	18.0354	18.014	18.3157	NaN	NaN	NaN	NaN	NaN	NaN	NaN	NaN	NaN
34	18.8725	18.5349	18.1698	18.4722	19.0252	18.9561	19.116	19.1285	18.6786	18.0684	16.8227	15.2668	NaN	NaN	NaN	NaN	NaN	NaN	NaN	NaN	22.8405	22.5745	22.6834	22.4596	22.1576	21.8051	21.657	21.4636	21.2183	20.9023	20.5509	20.2552	19.8662	19.349	19.2672	NaN	NaN	NaN	19.9836	20.053	19.6613	19.8679	20.9103	NaN	NaN	NaN	NaN	NaN	NaN
30	21.8412	21.7703	21.3757	21.5222	22.2348	22.0393	21.6935	21.1137	20.4115	19.5952	18.685	17.8373	17.5586	NaN	NaN	NaN	NaN	NaN	23.0856	NaN	24.5198	23.8406	23.5339	23.5423	23.412	23.3881	23.3171	22.989	22.8344	22.4536	22.0669	21.5184	21.041	19.7248	NaN	NaN	NaN	NaN	NaN	NaN	NaN	NaN	NaN	NaN	NaN	NaN	NaN	NaN	NaN
26	24.5046	24.4343	24.1229	23.7806	24.083	23.755	23.2305	22.4338	21.5536	20.7724	20.4016	19.9535	19.7691	22.2756	NaN	NaN	22.7529	24.5863	25.2945	24.4869	25.8317	25.571	25.6091	25.7381	25.5322	25.1706	25.0266	24.7265	24.3774	23.9409	23.2794	22.7901	21.2488	NaN	NaN	NaN	NaN	NaN	NaN	NaN	NaN	NaN	NaN	NaN	NaN	NaN	26.706	26.4902	NaN
22	25.8619	25.7665	25.5711	25.4167	25.1227	24.5414	24.0808	23.1788	22.8066	22.6409	22.1874	21.8919	22.2953	24.3661	26.2402	NaN	26.1003	26.1899	26.3056	27.3708	27.0989	27.1323	26.9945	27.0229	26.5761	26.1339	26.0232	25.6009	25.2465	24.8169	24.1385	23.1886	19.3151	NaN	NaN	NaN	NaN	NaN	NaN	NaN	NaN	NaN	NaN	27.8187	NaN	NaN	NaN	NaN	26.4883
18	26.8894	26.7616	26.5212	26.1799	25.7707	25.3265	25.1184	24.814	24.6716	24.6367	24.3085	24.5559	25.1856	26.2561	27.4734	28.6981	NaN	NaN	27.6931	27.6515	28.0064	28.0185	27.6964	27.4781	27.1102	26.8493	26.5121	26.1536	25.7796	25.467	24.8887	24.3927	22.2796	NaN	NaN	NaN	NaN	NaN	NaN	NaN	NaN	NaN	NaN	NaN	NaN	NaN	NaN	26.2724	26.7801
14	27.373	27.1664	26.8918	26.6167	26.2824	26.1761	26.1454	25.9183	25.9422	25.9726	25.9758	26.113	26.8627	27.3741	27.9536	28.504	27.4425	27.802	NaN	27.9692	28.0068	27.6801	27.7851	27.7113	27.6189	27.2679	26.9335	26.7168	26.504	26.3009	25.9473	26.1514	25.4453	NaN	NaN	NaN	NaN	NaN	NaN	NaN	NaN	NaN	NaN	NaN	27.5966	26.786	26.3557	26.5385	26.4988
10	28.0884	27.8192	27.5633	27.4551	27.2596	27.2746	27.1035	26.9239	27.0505	26.9055	26.8936	26.8019	27.24	27.495	27.6483	27.526	26.9776	26.6947	26.1118	27.8899	28.0051	NaN	NaN	NaN	27.9191	27.7555	27.5696	27.0504	27.052	26.9625	27.0643	27.459	27.4133	NaN	NaN	NaN	NaN	NaN	NaN	NaN	NaN	NaN	NaN	NaN	NaN	NaN	26.41	27.0623	27.1945
6	28.8571	28.6992	28.4513	27.9094	27.9024	27.9958	27.7404	27.7506	27.4598	27.5463	27.2796	26.5613	26.8343	26.945	26.9972	26.6303	26.9093	26.6124	26.4944	27.0779	26.9646	NaN	NaN	NaN	NaN	27.2041	27.5738	27.5217	27.5634	27.4823	27.711	27.9651	28.0527	28.2076	NaN	NaN	27.8395	NaN	NaN	NaN	NaN	NaN	NaN	NaN	NaN	NaN	27.1054	27.5899	28.2118
2	28.3653	28.4485	28.0843	27.4422	27.0019	26.9547	26.8049	26.7548	25.8256	26.0248	25.3044	24.3783	24.2208	24.6211	24.8893	24.3013	24.6701	24.8514	25.3673	25.6428	NaN	NaN	NaN	NaN	NaN	NaN	27.4121	27.4722	27.3687	27.188	27.0683	26.9571	26.4266	26.8691	26.7903	27.3788	27.661	27.7204	NaN	NaN	NaN	NaN	NaN	NaN	NaN	27.1417	27.4976	27.806	28.2814
-2	28.4492	28.3065	27.9754	27.8471	27.1811	26.9638	26.7013	26.1691	25.2391	25.2568	24.2749	22.9086	23.2411	23.2388	23.2304	22.4553	21.8804	21.4426	22.2433	21.8399	NaN	NaN	NaN	NaN	NaN	NaN	NaN	26.7679	26.8844	26.752	26.2956	26.0642	25.291	25.1695	25.3762	25.9675	26.3541	26.2388	NaN	NaN	NaN	NaN	NaN	NaN	27.4608	27.7517	28.0188	28.1143	28.2838
-6	29.3433	29.1189	28.935	28.8927	28.4263	28.3893	27.7996	27.0343	26.5384	26.5511	25.5767	24.767	24.8133	24.2323	24.3811	23.2701	22.2697	22.3695	22.2401	19.8573	NaN	NaN	NaN	NaN	NaN	NaN	NaN	NaN	NaN	26.8694	26.4603	25.9031	25.2599	24.8962	24.5429	24.3698	24.873	25.7687	NaN	NaN	NaN	NaN	NaN	NaN	27.7194	28.1358	27.9789	28.0835	28.0281
-10	29.2275	29.1961	29.0781	29.0065	28.8687	28.8381	28.5487	28.0189	27.4788	27.066	26.608	26.0619	25.453	24.8321	24.1313	22.9981	22.0585	21.887	21.6632	20.8115	NaN	NaN	NaN	NaN	NaN	NaN	NaN	NaN	NaN	26.9095	26.3095	25.646	25.0183	24.1513	23.2479	22.8779	22.9372	24.2462	24.8395	NaN	NaN	NaN	NaN	NaN	27.2974	27.3525	27.4796	27.6784	27.2538
-14	28.3877	28.3642	28.5116	28.4602	28.2015	28.1965	28.3065	28.0839	27.5672	27.0823	26.731	25.9909	25.0776	24.3221	23.2065	22.5138	21.8671	21.1116	20.5903	20.5541	18.384	NaN	NaN	NaN	NaN	NaN	NaN	NaN	26.819	26.5	25.5982	24.198	24.1004	23.2194	22.1719	21.3156	21.0332	21.4886	22.405	NaN	NaN	NaN	NaN	NaN	27.7366	27.1893	26.2402	26.4987	25.6155
-18	26.8205	26.9787	27.3031	26.8738	26.9089	26.967	27.0654	26.8196	26.868	26.6406	26.2008	25.2034	24.3214	23.5335	22.7668	22.7813	21.7654	21.1381	20.3382	19.376	19.1478	19.5354	NaN	NaN	NaN	NaN	NaN	NaN	26.1563	26.0097	25.0244	23.0536	23.2557	22.7228	21.8777	20.8608	20.0086	19.2205	NaN	NaN	NaN	NaN	NaN	27.0361	27.4063	NaN	24.3787	25.4728	24.4375
-22	25.0155	25.1306	24.8344	24.6678	25.0006	24.8552	24.9255	24.7759	25.5505	25.4903	24.1454	23.2716	23.4536	23.1931	23.3047	23.0017	21.719	20.8929	19.7576	18.3735	18.3444	18.586	NaN	NaN	NaN	NaN	NaN	NaN	24.9722	25.0339	24.2784	23.3843	23.0331	22.6839	21.3415	20.7232	19.8301	18.861	16.358	NaN	NaN	NaN	NaN	26.3225	26.6725	NaN	24.8101	25.0228	24.577
-26	23.0469	22.877	22.1722	22.3204	22.3598	22.402	22.0294	22.486	23.0337	23.0913	23.0079	22.5539	22.9948	22.9171	22.415	21.4737	21.2362	19.8442	19.2258	18.5913	17.6249	16.7639	NaN	NaN	NaN	NaN	23.3266	23.2339	23.4434	22.8749	22.3011	22.1727	22.2184	22.3666	20.9023	20.3121	19.7286	18.8139	16.6794	NaN	NaN	NaN	NaN	24.0488	24.2012	23.6526	24.2266	23.7694	23.548
-30	20.7534	20.2005	19.9977	19.8926	20.6667	20.0139	19.5362	20.4058	21.0906	20.9366	20.7537	21.1687	21.449	21.1302	20.6287	19.8734	19.914	18.5606	17.9071	17.9926	17.0162	15.5805	NaN	NaN	NaN	NaN	21.968	21.4409	20.9241	20.5898	20.2556	19.9503	19.8957	20.332	20.0155	19.4389	19.1618	18.7252	17.9764	NaN	NaN	NaN	23.648	22.0481	21.9225	21.8153	21.8824	21.3481	21.182
-34	18.5878	17.7535	17.446	17.0966	17.4858	17.0094	17.2101	17.6096	17.7358	17.5578	17.7319	17.9163	17.0222	17.9625	18.0609	17.5212	17.2263	16.8274	16.63	16.9794	16.4009	14.6963	NaN	NaN	NaN	18.9282	19.8968	18.6488	18.4516	18.2344	17.9422	18.0313	18.1526	18.2675	17.849	17.2777	17.211	17.3689	18.0728	17.672	19.6001	21.5289	21.0885	19.5455	19.3446	19.0882	19.0807	19.0303	18.4749
-38	16.8013	15.8848	15.5618	15.5278	15.2692	14.8625	14.7393	14.6066	14.9657	15.097	14.7217	14.3875	14.0709	15.0835	15.2843	14.6898	14.2621	14.7231	15.0659	15.4427	15.0942	NaN	NaN	NaN	12.8858	16.828	17.6224	15.7292	15.8329	15.8691	15.3638	14.7038	14.8512	15.5132	14.6325	14.256	13.7083	13.0678	16.1136	18.8956	19.7467	18.2518	18.6574	18.1346	17.9532	15.4333	16.1002	16.9958	15.9735
-42	14.7088	14.4751	13.8207	13.349	13.0477	12.6324	12.7214	12.8229	13.1324	12.965	12.312	12.1892	11.9634	12.374	11.678	11.7243	11.3883	11.5272	12.041	13.1705	13.0417	NaN	NaN	13.8874	11.2842	13.894	14.0012	11.8236	11.3443	11.976	11.9049	11.0055	11.1263	12.0249	10.7174	10.5065	9.8639	10.3039	12.6741	13.8573	15.0884	13.6271	12.3652	12.4552	11.1613	8.9171	10.4992	12.5595	12.3878
-46	11.3815	11.9913	12.2487	12.2205	11.223	10.6403	10.7155	10.9998	10.9147	10.4947	9.8592	9.652	8.9571	8.841	8.6301	9.2662	9.1534	8.7477	10.1069	12.3785	11.2838	NaN	NaN	10.3098	9.1876	10.7386	10.7705	9.3392	8.0373	8.0138	7.6684	7.2812	6.9609	6.4104	5.7192	6.3535	6.4803	7.428	7.3863	6.3624	6.9516	7.3478	7.2023	6.436	5.2704	4.3564	4.7168	6.1651	6.0547
-50	9.4855	9.9612	9.9204	9.9335	9.791	9.1915	9.3182	9.4401	8.9258	8.6802	8.1955	8.0382	7.6083	7.3116	7.8695	8.2681	7.6921	6.7378	7.4014	8.1721	9.5949	NaN	8.3991	8.1294	7.4022	6.9001	6.2198	4.8007	3.8527	3.5154	3.5568	3.5169	3.4412	2.714	2.2298	2.4392	2.7443	2.8434	2.4442	1.994	2.3207	2.7578	2.8643	3.0951	2.4457	2.6655	3.2692	2.7893	2.6202
-54	7.5011	7.7281	7.6339	6.7433	6.4011	5.7546	5.2266	5.3653	5.5424	5.6683	6.1049	6.3595	6.6954	7.4575	7.4569	7.1028	6.3042	5.7632	5.6473	6.0405	7.2655	7.9642	NaN	6.4374	5.8769	4.6819	2.9485	1.5518	1.0369	0.4711	0.6007	0.9018	0.9723	0.8219	0.1571	-0.091	-0.3235	-0.4098	-0.5984	-0.7064	-0.285	0.1131	0.2937	0.8062	0.6833	0.966	1.5608	0.7708	1.0208
-58	4.6666	4.1648	3.4283	3.6289	2.5855	1.6321	1.0649	1.6213	2.5076	2.9188	3.2716	3.6232	3.7863	3.6979	4.0457	4.6325	4.4472	4.15	4.8795	5.0744	4.9678	4.9042	3.8209	2.7364	2.2107	1.5064	0.8659	0.2729	-0.1964	-0.6488	-0.7376	-0.5215	-0.54	-0.8806	-1.2564	-1.2857	-1.444	-1.5178	-1.1603	-1.5475	-1.1375	-0.9828	-0.9777	-0.8454	-0.3332	0.0753	0.0457	-0.6295	-0.4694
-62	1.7903	1.4719	0.8249	0.8912	0.1745	-0.4378	-0.5375	-0.1417	0.2047	0.222	0.7006	1.7046	1.7865	1.3091	1.4933	2.0676	2.0672	1.64	1.8658	2.0372	1.6291	0.8999	0.041	-0.2471	-0.4345	-0.7315	-0.6694	-0.8641	-1.3133	-1.4161	-1.1716	-1.0259	-1.1295	-1.3306	-1.3268	-1.3991	-1.5703	-1.4214	-1.2979	-0.9906	-0.9518	-1.0077	-0.9937	-0.8321	-0.4991	-0.4048	-0.6379	-0.8424	-0.8923
-66	-0.385	0.0105	0.0967	0.2437	0.0386	-0.4881	-1.0225	-1.2908	-1.4083	-1.3821	-1.1037	-0.6858	-1.1267	-1.2105	-1.0447	-0.8767	-0.9014	-0.9287	-0.7362	-0.8136	-0.8993	-0.9379	-0.9415	-0.4756	-1.1357	-1.7744	-1.6934	-1.4397	-1.3092	-1.1953	-1.0368	-0.795	-0.5947	-0.8064	-0.7679	-0.9246	-0.9589	-0.6487	-0.3258	-0.3762	-0.5809	-0.785	-1.2634	-1.1735	-1.0901	-1.3335	-1.525	-1.3226	-1.3697
-70	-1.272	-1.0073	-0.938	-0.7547	-0.723	-0.89	-1.1726	-1.1864	-1.225	-1.3465	-1.3898	-1.3075	-1.1187	-1.1357	-1.2348	-1.3275	-1.7902	-1.4895	-1.1433	-1.1109	-1.1597	NaN	NaN	NaN	-1.8397	-2.0023	-1.616	-1.2667	-0.8386	-0.9168	-1.0552	-1.063	-1.0551	-1.1836	-1.0705	-0.9865	-0.85	-0.8379	-1.0604	-0.9866	-0.9054	-1.154	NaN	NaN	NaN	NaN	NaN	NaN	NaN
-74	-1.3444	-1.4233	-1.5038	-1.4891	-1.4652	-1.4233	-1.4478	-1.3999	-1.152	-1.1127	-1.5367	NaN	-1.4174	-0.3919	0.8086	0.2693	NaN	NaN	NaN	NaN	NaN	NaN	NaN	NaN	-1.5038	-1.5571	-1.6987	-1.8142	-1.7146	-1.6022	-1.5414	-1.2932	NaN	NaN	NaN	NaN	NaN	NaN	NaN	NaN	NaN	NaN	NaN	NaN	NaN	NaN	NaN	NaN	NaN
-78	-1.2611	-1.3784	-1.4853	-1.5905	NaN	NaN	NaN	NaN	NaN	NaN	NaN	NaN	NaN	NaN	NaN	NaN	NaN	NaN	NaN	NaN	NaN	NaN	NaN	NaN	NaN	NaN	NaN	-1.6219	-1.8709	NaN	NaN	NaN	NaN	NaN	NaN	NaN	NaN	NaN	NaN	NaN	NaN	NaN	NaN	NaN	NaN	NaN	NaN	NaN	NaN
-82	NaN	NaN	NaN	NaN	NaN	NaN	NaN	NaN	NaN	NaN	NaN	NaN	NaN	NaN	NaN	NaN	NaN	NaN	NaN	NaN	NaN	NaN	NaN	NaN	NaN	NaN	NaN	NaN	NaN	NaN	NaN	NaN	NaN	NaN	NaN	NaN	NaN	NaN	NaN	NaN	NaN	NaN	NaN	NaN	NaN	NaN	NaN	NaN	NaN
-86	NaN	NaN	NaN	NaN	NaN	NaN	NaN	NaN	NaN	NaN	NaN	NaN	NaN	NaN	NaN	NaN	NaN	NaN	NaN	NaN	NaN	NaN	NaN	NaN	NaN	NaN	NaN	NaN	NaN	NaN	NaN	NaN	NaN	NaN	NaN	NaN	NaN	NaN	NaN	NaN	NaN	NaN	NaN	NaN	NaN	NaN	NaN	NaN	NaN
[truncated: 23 more columns]

## Sheet: 20.0 m
	-177.5	-172.5	-167.5	-162.5	-157.5	-152.5	-147.5	-142.5	-137.5	-132.5	-127.5	-122.5	-117.5	-112.5	-107.5	-102.5	-97.5	-92.5	-87.5	-82.5	-77.5	-72.5	-67.5	-62.5	-57.5	-52.5	-47.5	-42.5	-37.5	-32.5	-27.5	-22.5	-17.5	-12.5	-7.5	-2.5	2.5	7.5	12.5	17.5	22.5	27.5	32.5	37.5	42.5	47.5	52.5	57.5	62.5
86	-1.652	-1.6553	-1.6554	-1.6544	-1.6533	-1.652	-1.6516	-1.65	-1.6512	-1.6532	-1.6582	-1.6636	-1.6694	-1.6738	-1.6762	-1.6756	-1.6732	-1.6762	-1.6803	-1.6763	-1.6708	-1.6635	-1.6539	-1.6434	-1.634	-1.627	-1.6227	-1.6185	-1.6188	-1.6201	-1.626	-1.6414	-1.6532	-1.6437	-1.6387	-1.6346	-1.6109	-1.6215	-1.6706	-1.6865	-1.7608	-1.8556	-1.9377	-1.9678	-1.9655	-1.9278	-1.9092	-1.8392	-1.7864
82	-1.7697	-1.7519	-1.725	-1.6932	-1.6671	-1.6488	-1.6344	-1.6287	-1.6368	-1.6543	-1.6798	-1.6946	-1.6984	-1.6896	-1.6452	-1.6129	-1.4862	-1.5466	-1.7233	NaN	NaN	NaN	NaN	NaN	NaN	-1.5033	NaN	NaN	NaN	NaN	NaN	-1.7151	-1.7751	-1.6381	-1.4148	-1.1457	-0.8689	-0.6688	-0.5277	-0.7482	-1.2568	-1.8185	-2.1933	-2.3951	-2.4324	-2.3976	-2.3397	-2.0533	-1.8607
78	-1.7545	-1.6665	-1.6967	-1.7748	-1.852	-1.8965	-1.8947	-1.8307	-1.6818	-1.4882	-1.3972	-1.4144	-1.5048	NaN	-1.8133	-1.9656	-2.096	-1.7212	NaN	NaN	-0.8137	-1.0857	NaN	NaN	NaN	NaN	NaN	NaN	NaN	NaN	NaN	NaN	-2.7084	-2.1144	-1.6534	-0.8429	0.1296	0.8978	1.3945	NaN	NaN	-0.5893	-0.9339	-1.1204	-1.2288	-1.306	-1.4818	-1.6114	-1.5213
74	-1.292	-1.2732	-1.4184	-1.5629	-1.5251	-1.5143	-1.7269	-1.8724	-1.6696	-1.1653	-0.7586	-0.8271	-0.8669	-1.7366	-1.7479	-1.6225	-1.7578	-1.2142	-0.6343	-0.3533	-0.2824	-0.1067	-0.5128	-0.8132	-1.2936	NaN	NaN	NaN	NaN	NaN	NaN	NaN	-2.2577	-1.8757	-0.9358	0.7448	2.2264	3.1505	3.5935	3.5677	3.331	3.0638	2.6033	2.0852	1.6839	1.2994	0.6704	NaN	-1.0244
70	-0.3429	-0.0196	0.2779	-0.4669	NaN	NaN	-1.0825	-1.6234	-1.2051	-1.273	-0.7836	-0.7473	-0.5515	NaN	NaN	NaN	NaN	NaN	NaN	NaN	NaN	NaN	-1.6305	-1.0114	-0.6785	NaN	NaN	NaN	NaN	NaN	NaN	-0.0724	-0.0816	0.3098	1.8556	4.0577	5.6184	6.2025	6.3871	6.9275	NaN	NaN	5.1184	4.1297	3.4363	3.3952	2.6147	1.6718	-0.5205
66	NaN	NaN	NaN	NaN	NaN	NaN	NaN	NaN	NaN	NaN	NaN	NaN	NaN	NaN	NaN	NaN	NaN	NaN	NaN	-0.3956	NaN	NaN	NaN	-1.5587	-0.072	NaN	NaN	NaN	3.3557	4.3896	4.7007	4.1696	3.3323	4.3716	4.3768	5.9277	7.3007	7.6894	7.1731	NaN	NaN	NaN	NaN	NaN	NaN	NaN	NaN	NaN	NaN
62	3.0086	2.6948	3.3067	NaN	NaN	NaN	NaN	NaN	NaN	NaN	NaN	NaN	NaN	NaN	NaN	NaN	NaN	2.4289	2.0503	1.627	1.5445	1.635	-0.7602	-0.195	1.4571	1.8217	NaN	NaN	6.3988	7.2249	8.0276	8.813	9.1758	8.6267	8.2509	8.1552	8.5029	NaN	NaN	NaN	NaN	NaN	NaN	NaN	NaN	NaN	NaN	NaN	NaN
58	4.6866	4.296	4.4889	4.6638	NaN	6.0187	6.7218	7.2619	7.4102	NaN	NaN	NaN	NaN	NaN	NaN	NaN	NaN	NaN	2.3899	2.7758	NaN	NaN	NaN	NaN	1.554	3.3795	3.9163	5.0062	6.6238	8.1686	9.8034	10.4671	10.4436	10.6665	10.7334	9.9376	9.0215	8.86	NaN	NaN	NaN	NaN	NaN	NaN	NaN	NaN	NaN	NaN	NaN
54	4.95	5.1756	5.4195	5.8737	6.1695	6.3314	6.7261	7.491	8.264	8.5272	NaN	NaN	NaN	NaN	NaN	NaN	NaN	NaN	NaN	NaN	NaN	NaN	NaN	NaN	-0.387	2.351	5.57	6.8916	7.1665	8.6398	10.5142	11.4539	11.8011	11.597	NaN	NaN	9.8006	9.2201	NaN	NaN	NaN	NaN	NaN	NaN	NaN	NaN	NaN	NaN	NaN
50	5.8968	6.1138	6.0272	6.3384	6.724	7.1366	7.5037	8.297	9.3078	10.0919	9.7496	NaN	NaN	NaN	NaN	NaN	NaN	NaN	NaN	NaN	NaN	NaN	NaN	3.1153	NaN	2.0109	5.7101	10.1821	11.0316	11.1672	12.0201	12.4382	12.862	12.442	11.7396	12.0774	NaN	NaN	NaN	NaN	NaN	NaN	NaN	NaN	NaN	NaN	NaN	NaN	NaN
46	8.2983	7.8685	7.8112	8.3163	8.9879	9.567	9.7353	10.345	11.1441	11.7938	11.705	NaN	NaN	NaN	NaN	NaN	NaN	NaN	NaN	NaN	NaN	NaN	NaN	5.2178	6.2086	4.8955	6.7155	13.4113	14.8804	14.305	14.5506	14.3359	14.2278	14.1367	13.8379	13.6793	NaN	NaN	NaN	NaN	NaN	NaN	NaN	NaN	NaN	NaN	NaN	NaN	NaN
42	12.0395	11.5191	11.2241	11.5096	11.9191	12.3447	12.9809	13.5114	14.1227	14.0618	12.931	NaN	NaN	NaN	NaN	NaN	NaN	NaN	NaN	NaN	NaN	NaN	10.7615	13.4699	15.2569	13.8106	14.764	18.3265	17.5012	16.9229	16.6904	16.5319	16.0519	15.6185	NaN	NaN	16.01	16.2267	16.5504	15.6743	NaN	NaN	NaN	NaN	NaN	NaN	NaN	NaN	NaN
38	15.7915	15.333	15.0089	15.1616	15.537	15.605	16.0439	16.3646	16.5787	16.2839	14.753	12.4109	NaN	NaN	NaN	NaN	NaN	NaN	NaN	NaN	NaN	17.0676	20.3983	21.6452	21.8203	21.1562	20.6195	20.2246	19.4648	18.9046	18.4265	18.5528	18.3162	17.7548	NaN	NaN	17.8796	18.035	17.9554	18.2791	NaN	NaN	NaN	NaN	NaN	NaN	NaN	NaN	NaN
34	18.8367	18.5492	18.19	18.443	18.9545	18.9569	19.1277	19.0984	18.7012	18.0831	16.8335	15.1731	NaN	NaN	NaN	NaN	NaN	NaN	NaN	NaN	23.4631	22.6318	22.6631	22.3957	22.0998	21.7494	21.6844	21.424	21.2152	20.8853	20.5532	20.2502	19.854	19.3471	19.2982	NaN	NaN	NaN	20.2021	19.9715	19.6149	19.8149	20.8629	NaN	NaN	NaN	NaN	NaN	NaN
30	21.8135	21.7263	21.3816	21.522	22.1828	22.0548	21.7292	21.1251	20.4338	19.5862	18.694	17.8998	17.4072	NaN	NaN	NaN	NaN	NaN	23.1609	NaN	24.6245	23.8244	23.5271	23.5417	23.4426	23.3863	23.3182	22.9755	22.8469	22.4682	22.08	21.5183	21.0197	19.6939	NaN	NaN	NaN	NaN	NaN	NaN	NaN	NaN	NaN	NaN	NaN	NaN	NaN	NaN	NaN
26	24.5116	24.427	24.1044	23.8324	24.0492	23.771	23.2389	22.437	21.5741	20.7519	20.3942	20.018	19.7876	22.0483	NaN	NaN	22.9962	24.6048	25.2603	24.6077	25.8558	25.5718	25.619	25.7312	25.5335	25.1895	25.0103	24.7341	24.3787	23.9085	23.2693	22.7612	21.1673	NaN	NaN	NaN	NaN	NaN	NaN	NaN	NaN	NaN	NaN	NaN	NaN	NaN	26.7467	26.3895	NaN
22	25.8928	25.7923	25.5783	25.4252	25.1073	24.5466	24.0762	23.2289	22.827	22.628	22.1634	21.8424	22.3182	24.3187	26.0648	NaN	26.1221	26.1498	26.0802	27.4167	27.093	27.1308	27.0216	27.0383	26.6058	26.1677	25.9981	25.5919	25.2043	24.7517	24.1089	23.1873	19.1361	NaN	NaN	NaN	NaN	NaN	NaN	NaN	NaN	NaN	NaN	27.7607	NaN	NaN	NaN	NaN	26.4556
18	26.8865	26.7751	26.5321	26.1738	25.7654	25.3449	25.0881	24.8456	24.6446	24.6057	24.2659	24.4327	25.1376	26.237	27.3855	28.4534	NaN	NaN	27.634	27.6996	28.0235	28.025	27.7037	27.4917	27.1496	26.8633	26.525	26.145	25.7425	25.4403	24.8751	24.3339	22.0096	NaN	NaN	NaN	NaN	NaN	NaN	NaN	NaN	NaN	NaN	NaN	NaN	NaN	NaN	26.16	26.7831
14	27.3742	27.155	26.8868	26.6133	26.2723	26.1906	26.0979	25.8777	25.9139	25.8903	25.872	25.8941	26.82	27.3731	27.9195	28.3859	26.6501	26.3222	NaN	27.9955	27.9938	27.7347	27.7928	27.6955	27.6237	27.2803	26.9632	26.7078	26.4683	26.2853	25.9322	25.938	25.0658	NaN	NaN	NaN	NaN	NaN	NaN	NaN	NaN	NaN	NaN	NaN	27.6314	26.416	26.0149	26.4667	26.5024
10	28.0755	27.7772	27.5509	27.4548	27.2482	27.2538	27.052	26.8371	27.0133	26.7677	26.6862	26.673	27.1953	27.4429	27.5064	27.1836	25.975	24.1152	23.9541	27.8103	27.9316	NaN	NaN	NaN	27.8953	27.7208	27.5626	27.0112	27.0101	26.9403	27.0019	27.2844	26.9962	NaN	NaN	NaN	NaN	NaN	NaN	NaN	NaN	NaN	NaN	NaN	NaN	NaN	26.2849	27.0072	27.1498
6	28.8329	28.6572	28.4271	27.932	27.916	27.9848	27.7131	27.7249	27.4822	27.5892	27.3417	26.6297	26.8413	26.9468	26.9019	26.4618	26.6865	25.3862	25.5771	26.9896	26.8491	NaN	NaN	NaN	NaN	27.0101	27.5285	27.4877	27.4974	27.475	27.6745	27.9406	28.0431	27.722	NaN	NaN	26.9667	NaN	NaN	NaN	NaN	NaN	NaN	NaN	NaN	NaN	27.0125	27.4459	28.1452
2	28.2517	28.3744	28.0124	27.4236	26.9953	26.9082	26.7448	26.6535	25.7766	26.0775	25.3001	24.3481	24.1363	24.5191	24.7675	24.0203	24.358	24.4811	25.2491	25.4875	NaN	NaN	NaN	NaN	NaN	NaN	27.28	27.4538	27.3584	27.1757	27.0089	26.9768	26.4278	26.8429	26.4363	27.1628	27.3249	27.1096	NaN	NaN	NaN	NaN	NaN	NaN	NaN	27.0281	27.2169	27.5075	28.1354
-2	28.4152	28.291	27.9239	27.8344	27.1763	26.8963	26.593	26.1349	25.2413	25.2486	24.3427	22.9735	23.1644	23.1311	23.0931	22.099	21.3647	20.6362	21.592	21.0143	NaN	NaN	NaN	NaN	NaN	NaN	NaN	26.7514	26.8601	26.7075	26.2578	26.0147	25.2133	25.043	25.2438	25.8647	25.8716	24.9139	NaN	NaN	NaN	NaN	NaN	NaN	27.3307	27.6028	27.7279	27.7459	27.9962
-6	29.3199	29.1203	28.9132	28.8841	28.4497	28.3676	27.6959	27.1232	26.5874	26.5164	25.6276	24.7949	24.791	24.2008	24.372	23.2819	22.2478	22.2682	22.0432	19.1071	NaN	NaN	NaN	NaN	NaN	NaN	NaN	NaN	NaN	26.8302	26.4366	25.8837	25.2141	24.8064	24.5142	24.288	24.5644	23.6644	NaN	NaN	NaN	NaN	NaN	NaN	27.551	27.8288	27.6454	27.6809	27.7294
-10	29.2225	29.1648	29.0378	28.9708	28.8875	28.7973	28.4865	28.0179	27.4482	27.0302	26.6287	26.0499	25.4313	24.7994	24.1188	22.9913	22.058	21.8125	21.5643	20.5119	NaN	NaN	NaN	NaN	NaN	NaN	NaN	NaN	NaN	26.8615	26.2539	25.6308	24.9861	24.1239	23.246	22.7973	22.8398	22.8095	22.3565	NaN	NaN	NaN	NaN	NaN	27.1303	27.0687	27.2918	27.5517	26.9009
-14	28.3241	28.3042	28.4402	28.3731	28.1378	28.167	28.2192	28.0146	27.5312	27.0385	26.7175	25.9571	25.2934	24.3456	23.1968	22.5158	21.8358	21.0567	20.5247	20.4427	17.9029	NaN	NaN	NaN	NaN	NaN	NaN	NaN	26.7751	26.4316	25.5557	24.1644	24.0635	23.1274	22.1006	21.2499	20.9563	20.9389	20.4347	NaN	NaN	NaN	NaN	NaN	27.5546	26.9607	26.2325	26.3617	25.6601
-18	26.7088	26.8913	27.1663	26.7523	26.8444	26.8799	26.9576	26.7676	26.7986	26.55	26.061	25.1499	25.0506	23.7948	22.7073	22.74	21.6942	21.0939	20.2521	19.2977	18.9426	18.0749	NaN	NaN	NaN	NaN	NaN	NaN	26.0676	25.9316	24.9561	22.972	23.1948	22.6165	21.7669	20.7864	19.9401	19.067	NaN	NaN	NaN	NaN	NaN	26.8467	27.0543	NaN	24.5176	25.4407	24.7851
-22	24.8774	24.9321	24.6514	24.5679	24.9638	24.7875	24.9415	24.9002	25.2905	24.959	23.6564	23.2366	23.4821	23.1672	23.222	22.946	21.6735	20.8703	19.6965	18.2884	18.2778	17.6881	NaN	NaN	NaN	NaN	NaN	NaN	24.867	24.972	24.1505	23.2119	22.8055	22.3445	21.2254	20.6186	19.7529	18.7926	16.0178	NaN	NaN	NaN	NaN	26.1919	26.3774	NaN	24.8266	24.828	24.3382
-26	22.8892	22.6392	22.017	22.1925	22.2441	22.408	22.0738	22.4656	22.8158	22.7767	22.8219	22.4879	22.8672	22.7834	22.2815	21.4479	21.1879	19.8023	19.139	18.4753	17.5733	16.5231	NaN	NaN	NaN	NaN	22.7195	22.9501	23.3702	22.8161	22.1901	22.0579	21.9809	21.7908	20.5023	20.0066	19.5802	18.7265	16.4838	NaN	NaN	NaN	NaN	23.9054	24.0817	23.5868	24.0345	23.5618	23.2578
-30	20.5933	20.0497	19.8588	19.7268	20.5274	19.9968	19.5961	20.3372	21.0723	20.8841	20.6755	20.9905	21.3179	20.8741	20.3881	19.7642	19.7785	18.5242	17.7335	17.7922	16.9456	15.3589	NaN	NaN	NaN	NaN	21.8748	21.3682	20.8484	20.5046	20.1939	19.8544	19.7182	19.7904	19.2009	18.8397	18.938	18.59	17.834	NaN	NaN	NaN	23.4914	21.8542	21.7916	21.6423	21.6029	21.0641	20.9544
-34	18.4177	17.5891	17.2792	16.9505	17.2652	16.8857	17.0667	17.4982	17.7078	17.5299	17.6468	17.7948	17.0023	17.8437	17.8577	17.1923	16.9188	16.6602	16.396	16.7198	16.2415	14.4662	NaN	NaN	NaN	18.2554	19.7348	18.5111	18.3281	18.1674	17.9038	17.9432	18.0564	18.1662	17.5789	17.0863	17.1254	17.2261	17.9351	17.4286	18.9663	21.2937	21.0174	19.1863	19.1033	18.9943	18.8027	18.6042	18.3033
-38	16.6372	15.6791	15.3637	15.3542	15.0602	14.736	14.6039	14.5267	14.9291	15.0779	14.7038	14.3554	14.025	14.9518	15.0124	14.4767	14.0423	14.4807	14.8517	15.1971	14.7901	NaN	NaN	NaN	11.5707	16.2252	17.466	15.5907	15.7605	15.8245	15.309	14.667	14.7959	15.4142	14.5366	14.1906	13.6551	12.9882	15.9241	18.6661	19.4908	18.2767	18.633	17.9064	17.7078	15.344	15.9857	16.7633	16.0899
-42	14.5591	14.2789	13.7133	13.2172	12.8065	12.4521	12.635	12.7383	13.0415	12.9422	12.259	12.2086	12.0723	12.2857	11.6144	11.7052	11.2953	11.3861	11.9761	13.0667	12.854	NaN	NaN	13.2574	10.5506	13.5147	13.8186	11.6617	11.2884	11.9611	11.8979	10.9902	11.0745	11.9872	10.6835	10.4691	9.8336	10.1438	12.4347	13.7619	14.9756	13.6322	12.3095	12.2056	10.825	8.7969	10.4038	12.5117	12.4774
-46	11.2453	11.8937	12.1905	12.1299	11.1042	10.5829	10.69	10.9254	10.8715	10.4696	9.7936	9.6435	9.2639	8.8546	8.6278	9.2415	9.0974	8.609	9.9911	12.3352	11.2006	NaN	NaN	9.8236	8.8888	10.5962	10.6337	9.1609	7.9551	7.9974	7.6519	7.2546	6.9333	6.3966	5.6812	6.2947	6.4934	7.3427	7.1507	6.3393	6.9237	7.3532	7.1981	6.3613	5.1358	4.2724	4.6432	6.11	6.0682
-50	9.3447	9.8999	9.8509	9.8979	9.7701	9.1749	9.2785	9.3209	8.7821	8.6156	8.2798	8.4823	7.9112	7.2997	7.8385	8.1832	7.6181	6.689	7.3603	8.0008	9.3007	NaN	7.852	7.7674	7.2195	6.8107	6.1216	4.6617	3.7457	3.4583	3.564	3.5481	3.4861	2.732	2.2146	2.4618	2.7762	2.8359	2.2835	1.9627	2.3131	2.7471	2.8502	3.062	2.4021	2.6144	3.2349	2.7881	2.745
-54	7.4425	7.6885	7.4909	6.673	6.3964	5.7347	5.1892	5.3039	5.4236	5.5918	6.0778	6.3951	6.7079	7.3901	7.305	6.9049	6.1849	5.7417	5.6778	6.1147	7.1158	7.7446	NaN	6.2801	5.7631	4.5639	2.8846	1.5094	0.9778	0.42	0.5721	0.9151	0.9916	0.8536	0.143	-0.0783	-0.341	-0.4712	-0.6894	-0.7357	-0.2876	0.1047	0.2722	0.7586	0.6201	0.9322	1.5711	0.7752	1.1075
-58	4.6694	4.24	3.2813	3.4737	2.5724	1.6021	1.0086	1.5321	2.4014	2.8422	3.1814	3.5531	3.6691	3.5644	3.9392	4.5933	4.4546	4.1578	4.9003	5.1438	4.9354	4.8323	3.7744	2.6742	2.1268	1.3792	0.7937	0.2539	-0.2084	-0.6618	-0.7714	-0.557	-0.5549	-0.8714	-1.2923	-1.272	-1.421	-1.5436	-1.2605	-1.6632	-1.1893	-1.0395	-1.0745	-0.9468	-0.4821	-0.0432	0.0114	-0.6405	-0.4718
-62	1.7288	1.4555	0.8221	0.8014	0.1012	-0.5409	-0.6398	-0.2206	0.1467	0.1855	0.6811	1.6441	1.6413	1.1954	1.4483	2.0302	2.0295	1.6265	1.8748	2.05	1.6327	0.8852	0.0059	-0.2996	-0.4747	-0.7606	-0.7028	-0.9057	-1.3398	-1.4185	-1.1833	-1.0793	-1.1937	-1.4072	-1.41	-1.3562	-1.4695	-1.3609	-1.335	-1.1132	-1.0261	-1.074	-1.0717	-0.885	-0.5668	-0.4932	-0.6926	-0.8707	-0.932
-66	-0.4363	-0.0148	0.0639	0.1381	-0.1053	-0.6633	-1.1449	-1.3463	-1.4332	-1.3865	-1.0558	-0.6689	-1.221	-1.3155	-1.1141	-0.9268	-0.9227	-0.9093	-0.6937	-0.773	-0.9041	-1.0073	-1.0472	-0.6482	-1.2675	-1.7926	-1.6912	-1.4871	-1.3343	-1.1423	-0.9503	-0.9036	-0.7711	-0.8357	-0.7088	-0.9453	-1.0263	-0.6641	-0.2666	-0.3893	-0.6176	-0.8086	-1.2971	-1.2195	-1.1361	-1.3555	-1.5071	-1.2941	-1.4286
-70	-1.3255	-1.0485	-0.9987	-0.9019	-0.8681	-0.9157	-1.0888	-1.1318	-1.2311	-1.3222	-1.2529	-1.0911	-0.9618	-1.1065	-1.2685	-1.3708	-1.736	-1.3004	-0.9212	-0.985	-1.1922	NaN	NaN	NaN	-1.8772	-1.9927	-1.6271	-1.259	-0.613	-0.7781	-1.0021	-1.0769	-0.8767	-0.5864	-0.1146	-0.3923	-0.8481	-0.9039	-0.9633	-0.9382	-0.9349	-1.2007	NaN	NaN	NaN	NaN	NaN	NaN	NaN
-74	-1.3551	-1.417	-1.502	-1.5139	-1.4816	-1.3988	-1.3784	-1.3385	-1.1447	-1.155	-1.5278	NaN	-1.1956	-0.5902	0.933	0.1118	NaN	NaN	NaN	NaN	NaN	NaN	NaN	NaN	-1.5532	-1.563	-1.6753	-1.7496	-1.6593	-1.5888	-1.5965	-1.4097	NaN	NaN	NaN	NaN	NaN	NaN	NaN	NaN	NaN	NaN	NaN	NaN	NaN	NaN	NaN	NaN	NaN
-78	-1.3024	-1.4039	-1.5034	-1.5986	NaN	NaN	NaN	NaN	NaN	NaN	NaN	NaN	NaN	NaN	NaN	NaN	NaN	NaN	NaN	NaN	NaN	NaN	NaN	NaN	NaN	NaN	NaN	-1.6229	-1.8157	NaN	NaN	NaN	NaN	NaN	NaN	NaN	NaN	NaN	NaN	NaN	NaN	NaN	NaN	NaN	NaN	NaN	NaN	NaN	NaN
-82	NaN	NaN	NaN	NaN	NaN	NaN	NaN	NaN	NaN	NaN	NaN	NaN	NaN	NaN	NaN	NaN	NaN	NaN	NaN	NaN	NaN	NaN	NaN	NaN	NaN	NaN	NaN	NaN	NaN	NaN	NaN	NaN	NaN	NaN	NaN	NaN	NaN	NaN	NaN	NaN	NaN	NaN	NaN	NaN	NaN	NaN	NaN	NaN	NaN
-86	NaN	NaN	NaN	NaN	NaN	NaN	NaN	NaN	NaN	NaN	NaN	NaN	NaN	NaN	NaN	NaN	NaN	NaN	NaN	NaN	NaN	NaN	NaN	NaN	NaN	NaN	NaN	NaN	NaN	NaN	NaN	NaN	NaN	NaN	NaN	NaN	NaN	NaN	NaN	NaN	NaN	NaN	NaN	NaN	NaN	NaN	NaN	NaN	NaN
[truncated: 23 more columns]

## Sheet: 30.0 m
	-177.5	-172.5	-167.5	-162.5	-157.5	-152.5	-147.5	-142.5	-137.5	-132.5	-127.5	-122.5	-117.5	-112.5	-107.5	-102.5	-97.5	-92.5	-87.5	-82.5	-77.5	-72.5	-67.5	-62.5	-57.5	-52.5	-47.5	-42.5	-37.5	-32.5	-27.5	-22.5	-17.5	-12.5	-7.5	-2.5	2.5	7.5	12.5	17.5	22.5	27.5	32.5	37.5	42.5	47.5	52.5	57.5	62.5
86	-1.6542	-1.6585	-1.6601	-1.661	-1.6614	-1.6597	-1.6582	-1.6551	-1.6535	-1.6532	-1.6562	-1.6609	-1.6668	-1.672	-1.6751	-1.6756	-1.6746	-1.678	-1.6833	-1.683	-1.678	-1.6707	-1.6612	-1.6492	-1.6346	-1.6223	-1.6134	-1.6047	-1.5923	-1.5871	-1.6021	-1.6322	-1.6432	-1.6311	-1.6242	-1.6172	-1.5918	-1.5997	-1.6477	-1.6481	-1.687	-1.7456	-1.7724	-1.7378	-1.6816	-1.5692	-1.4932	-1.4777	-1.4506
82	-1.7188	-1.7076	-1.6883	-1.6682	-1.6527	-1.6443	-1.6351	-1.6261	-1.6237	-1.6287	-1.6434	-1.6572	-1.6659	-1.6645	-1.6271	-1.5992	-1.4632	-1.4723	-1.7148	NaN	NaN	NaN	NaN	NaN	NaN	NaN	NaN	NaN	NaN	NaN	NaN	-1.7946	-1.8449	-1.5827	-1.3496	-1.0585	-0.7713	-0.5691	-0.3978	-0.6033	-1.0911	-1.6454	-1.9987	-2.1863	-2.2002	-2.1083	-1.9902	-1.6339	-1.4326
78	-1.6784	-1.6215	-1.6697	-1.7544	-1.8466	-1.9115	-1.9353	-1.893	-1.7718	-1.6086	-1.5046	-1.4733	-1.6048	NaN	-1.7176	-1.8751	-1.7897	-1.2991	NaN	NaN	-0.7139	-0.8714	NaN	NaN	NaN	NaN	NaN	NaN	NaN	NaN	NaN	NaN	-2.6637	-2.0033	-1.5411	-0.7262	0.2714	1.0736	1.5582	NaN	NaN	-0.5101	-0.9317	-1.1842	-1.2886	-1.2597	-1.2575	-1.2925	-1.3071
74	-0.9746	-1.0575	-1.3467	-1.5641	-1.5212	-1.4718	-1.697	-1.9516	-1.9282	-1.5949	-1.1556	-1.1043	-1.1036	-1.2342	-1.4957	-1.339	-1.3216	-0.8224	-0.4784	-0.4099	-0.469	-0.4099	-0.7951	-1.0124	-1.2727	NaN	NaN	NaN	NaN	NaN	NaN	NaN	-2.0806	-1.7431	-0.8541	0.7493	2.2136	3.1806	3.6658	3.6621	3.4072	3.109	2.5954	2.0203	1.6152	1.3078	0.7938	NaN	-1.0527
70	-0.0179	0.2659	0.3402	-0.7486	NaN	NaN	-1.0277	-1.7405	-1.459	-1.9165	-1.2771	-1.0418	-0.8613	NaN	NaN	NaN	NaN	NaN	NaN	NaN	NaN	NaN	-1.9825	-1.4673	-0.9157	NaN	NaN	NaN	NaN	NaN	NaN	-0.1995	-0.0617	0.3295	1.865	4.0536	5.5971	6.1845	6.4499	7.0031	NaN	NaN	5.1277	4.1106	3.3691	3.2862	2.3495	1.4408	-0.8656
66	NaN	NaN	NaN	NaN	NaN	NaN	NaN	NaN	NaN	NaN	NaN	NaN	NaN	NaN	NaN	NaN	NaN	NaN	NaN	-0.0496	NaN	NaN	NaN	-2.4528	-0.0403	NaN	NaN	NaN	3.3881	4.5166	4.7317	4.4677	3.3423	4.4309	4.3481	5.9186	7.3207	7.7108	7.2523	NaN	NaN	NaN	NaN	NaN	NaN	NaN	NaN	NaN	NaN
62	2.3726	1.2853	NaN	NaN	NaN	NaN	NaN	NaN	NaN	NaN	NaN	NaN	NaN	NaN	NaN	NaN	NaN	0.8107	1.277	0.9123	1.0914	0.1152	-0.847	-0.2414	1.5711	2.0645	NaN	NaN	6.7383	7.6721	8.1743	8.8252	9.2186	8.6653	8.2901	8.1653	8.5675	NaN	NaN	NaN	NaN	NaN	NaN	NaN	NaN	NaN	NaN	NaN	NaN
58	4.5394	4.1514	4.0972	4.692	NaN	5.9907	6.7322	7.3201	7.5862	NaN	NaN	NaN	NaN	NaN	NaN	NaN	NaN	NaN	0.9068	1.37	NaN	NaN	NaN	NaN	1.6185	3.4067	3.949	5.0621	7.245	9.6221	10.3977	10.5353	10.452	10.693	10.8307	NaN	9.0145	8.8291	NaN	NaN	NaN	NaN	NaN	NaN	NaN	NaN	NaN	NaN	NaN
54	4.9219	5.1589	5.4019	5.8982	6.1732	6.2876	6.6866	7.5127	8.3166	8.6854	NaN	NaN	NaN	NaN	NaN	NaN	NaN	NaN	NaN	NaN	NaN	NaN	NaN	NaN	-0.3794	2.3584	5.5515	6.8668	7.2178	8.8676	10.638	11.5084	11.7707	11.6033	NaN	NaN	9.9556	9.6455	NaN	NaN	NaN	NaN	NaN	NaN	NaN	NaN	NaN	NaN	NaN
50	6.3169	6.1637	6.0039	6.3559	6.7924	7.1732	7.5381	8.3054	9.2634	10.0443	9.7289	NaN	NaN	NaN	NaN	NaN	NaN	NaN	NaN	NaN	NaN	NaN	NaN	3.0542	NaN	1.8558	5.6275	10.1746	11.0541	11.1978	12.0562	12.4798	12.8517	12.448	11.7039	12.0335	NaN	NaN	NaN	NaN	NaN	NaN	NaN	NaN	NaN	NaN	NaN	NaN	NaN
46	9.4165	8.2045	7.8466	8.4573	9.1424	9.4648	9.6987	10.3188	11.0729	11.7474	11.584	NaN	NaN	NaN	NaN	NaN	NaN	NaN	NaN	NaN	NaN	NaN	NaN	4.6354	6.1413	4.6635	6.5069	13.4414	14.9781	14.466	14.5748	14.33	14.2069	14.1564	13.8228	13.5457	NaN	NaN	NaN	NaN	NaN	NaN	NaN	NaN	NaN	NaN	NaN	NaN	NaN
42	12.0761	11.5415	11.2283	11.4839	11.9169	12.2811	12.8867	13.4478	14.0421	14.053	12.8113	NaN	NaN	NaN	NaN	NaN	NaN	NaN	NaN	NaN	NaN	NaN	10.8426	13.5604	15.4352	13.9867	14.7835	18.416	17.5201	16.9544	16.6586	16.4766	16.0237	15.6274	NaN	NaN	16.0037	16.1761	16.3531	15.5404	NaN	NaN	NaN	NaN	NaN	NaN	NaN	NaN	NaN
38	15.7931	15.3382	15.0135	15.0473	15.4641	15.5406	15.9365	16.3136	16.559	16.2911	14.6979	12.1102	NaN	NaN	NaN	NaN	NaN	NaN	NaN	NaN	NaN	17.055	20.4578	21.7067	21.8743	21.2438	20.6973	20.2244	19.4399	18.8825	18.4106	18.5075	18.2597	17.7211	NaN	NaN	17.6859	17.9892	17.6637	18.1859	NaN	NaN	NaN	NaN	NaN	NaN	NaN	NaN	NaN
34	18.8394	18.5061	18.1583	18.3502	18.8848	18.9423	19.1101	19.101	18.6991	18.0915	16.8237	14.968	NaN	NaN	NaN	NaN	NaN	NaN	NaN	NaN	23.5718	22.6696	22.6789	22.3921	22.0823	21.7568	21.6697	21.3941	21.1749	20.8774	20.565	20.2706	19.8375	19.3721	19.2218	NaN	NaN	NaN	20.4876	19.9627	19.4804	19.723	20.7376	NaN	NaN	NaN	NaN	NaN	NaN
30	21.7659	21.6378	21.3195	21.5388	22.1565	21.979	21.688	21.1402	20.4462	19.5893	18.7237	17.9165	17.0998	NaN	NaN	NaN	NaN	NaN	23.1437	NaN	24.6381	23.779	23.485	23.5081	23.4011	23.3625	23.2854	22.9571	22.8408	22.4915	22.074	21.5222	20.9928	19.6336	NaN	NaN	NaN	NaN	NaN	NaN	NaN	NaN	NaN	NaN	NaN	NaN	NaN	NaN	NaN
26	24.4967	24.3795	24.0854	23.8837	24.0412	23.7203	23.2298	22.439	21.5957	20.7408	20.3995	20.0379	19.6557	21.5844	NaN	NaN	23.4839	24.6266	25.2096	24.7678	25.9075	25.5426	25.6038	25.7095	25.491	25.1838	24.9893	24.7256	24.361	23.9032	23.2697	22.758	21.1073	NaN	NaN	NaN	NaN	NaN	NaN	NaN	NaN	NaN	NaN	NaN	NaN	NaN	26.1255	25.6712	NaN
22	25.8934	25.7836	25.5856	25.4405	25.096	24.5455	24.0648	23.2002	22.8143	22.5606	22.0901	21.8276	22.2337	24.0736	25.6085	NaN	26.0301	25.9779	25.8011	27.3998	27.0623	27.0884	27.0264	27.0597	26.6519	26.2099	25.9643	25.5715	25.1731	24.7043	24.0992	23.1972	18.9209	NaN	NaN	NaN	NaN	NaN	NaN	NaN	NaN	NaN	NaN	27.6572	NaN	NaN	NaN	NaN	26.2157
18	26.8888	26.7904	26.5317	26.1979	25.7624	25.3441	25.021	24.8032	24.6539	24.6115	24.2497	24.3456	25.0119	26.0872	26.9538	27.6867	NaN	NaN	27.6658	27.7202	28.0313	28.0299	27.7222	27.5261	27.1969	26.8712	26.5075	26.129	25.7226	25.4004	24.8758	24.1815	21.3076	NaN	NaN	NaN	NaN	NaN	NaN	NaN	NaN	NaN	NaN	NaN	NaN	NaN	NaN	25.8098	26.715
14	27.367	27.1784	26.8791	26.6163	26.2554	26.1493	25.9648	25.6848	25.6094	25.5929	25.2665	25.2341	26.5944	27.12	27.5888	27.8864	25.1501	23.3594	NaN	27.9529	27.9442	27.682	27.7392	27.6455	27.6352	27.3155	26.9955	26.6857	26.391	26.0835	25.8281	25.0578	23.6974	NaN	NaN	NaN	NaN	NaN	NaN	NaN	NaN	NaN	NaN	NaN	27.6746	24.9989	25.4299	26.2422	26.3993
10	28.0586	27.7742	27.5107	27.3785	27.1865	27.1234	26.7379	26.1027	26.2756	26.13	25.5372	25.9193	27.0063	26.9624	26.6295	25.342	22.953	20.622	21.5084	27.1341	27.742	NaN	NaN	NaN	27.8334	27.6749	27.5257	26.8576	26.7725	26.5627	26.8167	26.2821	25.5772	NaN	NaN	NaN	NaN	NaN	NaN	NaN	NaN	NaN	NaN	NaN	NaN	NaN	25.965	26.8369	27.0051
6	28.7935	28.6162	28.3755	27.9107	27.8752	27.9234	27.6662	27.6388	27.369	27.6493	27.3813	26.6751	26.8037	26.7692	26.6513	25.6241	25.4869	23.8759	24.4394	26.3358	26.6162	NaN	NaN	NaN	NaN	26.8203	27.4545	27.3585	27.3371	27.4388	27.6791	27.6926	27.4651	26.6752	NaN	NaN	25.5313	NaN	NaN	NaN	NaN	NaN	NaN	NaN	NaN	NaN	26.7076	27.0154	27.9102
2	28.2077	28.3486	27.9342	27.3823	26.9612	26.8636	26.7141	26.6163	25.7059	25.9914	25.2877	24.2514	23.9538	24.2942	24.6165	23.6671	23.7912	23.9173	24.5347	24.7728	NaN	NaN	NaN	NaN	NaN	NaN	27.2021	27.4295	27.352	27.1623	26.9447	26.9483	26.3446	26.6497	25.8751	26.5187	26.2777	24.567	NaN	NaN	NaN	NaN	NaN	NaN	NaN	26.7458	26.6549	26.6817	27.7071
-2	28.4423	28.2206	27.8697	27.7649	27.194	26.9305	26.5812	26.1101	25.2825	25.1991	24.4796	23.0518	23.0645	22.965	22.8948	21.6122	20.7052	19.7787	20.248	19.5366	NaN	NaN	NaN	NaN	NaN	NaN	NaN	26.742	26.8421	26.6713	26.1926	25.9891	25.0708	24.7497	24.821	25.2738	24.4454	23.1232	NaN	NaN	NaN	NaN	NaN	NaN	27.1462	27.2857	27.2134	26.7172	27.1187
-6	29.3522	29.0775	28.8922	28.8678	28.3666	28.2656	27.654	27.0955	26.5459	26.6579	25.6591	24.7809	24.7727	24.1832	24.3746	23.1946	22.1414	22.1091	21.6232	18.1145	NaN	NaN	NaN	NaN	NaN	NaN	NaN	NaN	NaN	26.809	26.3881	25.8813	25.1918	24.7478	24.417	23.9529	23.3822	20.7117	NaN	NaN	NaN	NaN	NaN	NaN	27.2817	27.2174	26.8093	26.3353	26.6572
-10	29.2011	29.1404	29.0232	28.951	28.823	28.6699	28.445	27.9691	27.4085	27.0104	26.5669	25.9896	25.3745	24.7565	24.1802	22.9634	22.0345	21.7989	21.3735	19.9104	NaN	NaN	NaN	NaN	NaN	NaN	NaN	NaN	NaN	26.8138	26.198	25.5904	24.9326	24.0581	23.1768	22.6866	22.2751	19.8784	19.5072	NaN	NaN	NaN	NaN	NaN	26.8161	26.5856	26.775	26.9073	26.193
-14	28.2488	28.2515	28.3816	28.3249	28.0817	28.0375	28.0944	27.8995	27.4782	26.9503	26.6165	25.9108	25.2379	24.3571	23.2044	22.5092	21.8072	20.9854	20.4055	20.0401	17.2188	NaN	NaN	NaN	NaN	NaN	NaN	NaN	26.7228	26.3246	25.5283	24.1033	24.0056	23.0258	22.0386	21.1697	20.7049	19.6773	18.2313	NaN	NaN	NaN	NaN	NaN	27.1735	26.7638	26.2721	26.2543	25.6259
-18	26.5594	26.7574	27.0312	26.6373	26.7697	26.7862	26.8172	26.6339	26.6996	26.444	26.1929	25.712	24.9396	23.7498	22.6539	22.7114	21.6923	20.9985	20.1622	19.2143	18.4193	16.3981	NaN	NaN	NaN	NaN	NaN	NaN	25.8414	25.776	24.8478	22.8206	23.0896	22.487	21.6922	20.7111	19.7638	18.7105	NaN	NaN	NaN	NaN	NaN	26.3704	26.6106	NaN	25.0819	25.2262	24.7243
-22	24.647	24.663	24.4137	24.4077	24.8538	24.7399	24.8479	24.7732	24.9551	24.5098	24.2437	24.4121	23.4071	23.0461	23.1698	22.8605	21.6207	20.7362	19.5903	18.2577	18.1481	16.592	NaN	NaN	NaN	NaN	NaN	NaN	24.6479	24.7528	23.8692	22.7169	22.3885	22.116	21.0913	20.5201	19.6159	18.6112	15.3986	NaN	NaN	NaN	NaN	26.0193	26.0082	NaN	24.781	24.5707	24.0438
-26	22.5946	22.292	21.7504	21.9991	22.0062	22.223	22.1641	22.589	22.4552	22.4363	22.7284	22.4175	22.6925	22.6511	22.1834	21.3265	21.0085	20.1202	19.2463	18.2916	17.5266	16.024	NaN	NaN	NaN	NaN	21.612	22.7071	23.3062	22.9464	21.8518	21.5536	21.2608	21.1458	20.1681	19.7267	19.3607	18.5881	16.2129	NaN	NaN	NaN	NaN	23.646	23.9474	23.2769	23.6312	23.0523	22.5808
-30	20.2098	19.7125	19.5645	19.5217	20.3546	19.8117	19.7356	20.3993	20.8872	20.8731	20.5531	20.4977	21.0346	20.6069	20.0722	19.5263	19.5395	18.7355	17.8751	17.5644	16.7709	15.0062	NaN	NaN	NaN	NaN	21.7058	21.2936	20.8154	21.2484	20.8959	19.6371	19.2175	19.3798	18.7633	18.4136	18.5235	18.4026	17.6366	NaN	NaN	NaN	23.2254	21.5924	21.585	21.3552	21.1777	20.4165	20.1443
-34	18.0667	17.267	17.0241	16.8713	17.173	16.7638	16.9467	17.3499	17.6049	17.4564	17.4946	17.612	17.046	17.6922	17.5421	16.8106	16.6343	16.2958	15.8657	16.2079	15.9247	14.0885	NaN	NaN	NaN	17.4984	19.5793	18.4284	18.0873	18.1813	18.2235	17.7743	17.8795	18.0531	17.3772	17.1931	16.985	16.9706	17.7374	17.0458	17.8083	20.8534	20.9183	18.8775	18.7423	18.8487	18.4591	18.0474	17.753
-38	16.3714	15.3613	15.012	14.9979	14.8169	14.5817	14.4567	14.3958	14.8722	15.0622	14.6446	14.2592	13.9515	14.6779	14.587	14.0745	13.8081	14.2803	14.3842	14.7753	14.4387	NaN	NaN	NaN	9.9484	15.5373	17.2957	15.4969	15.6518	15.7053	15.2291	14.5958	14.6945	15.187	14.3276	14.1552	13.5616	12.8144	15.7421	18.4108	19.0992	18.1243	18.6157	17.3905	17.1691	15.2098	15.8602	16.439	15.7311
-42	14.3478	14.047	13.4531	12.9177	12.4171	12.1104	12.3904	12.5815	12.9708	12.9248	12.2354	12.0832	11.8878	12.0225	11.4819	11.6046	11.2208	11.3123	11.8823	12.8771	12.5647	NaN	NaN	12.1374	9.39	13.0045	13.6073	11.5383	11.2336	11.9032	11.8884	11.0142	11.0236	11.9198	10.6522	10.4039	9.7794	9.8334	12.1585	13.6807	14.8741	13.6319	12.2088	11.9462	10.8088	8.8384	10.2888	12.4896	12.8613
-46	11.0164	11.6667	11.929	11.891	10.7755	10.4024	10.6106	10.8873	10.8612	10.4495	9.7427	9.5575	9.2252	8.8261	8.5977	9.1978	9.044	8.4675	9.7987	12.0605	10.9506	NaN	NaN	9.0217	8.3038	10.3648	10.517	8.9795	7.8797	7.9437	7.6755	7.2737	6.8907	6.3745	5.683	6.2754	6.4683	7.037	6.871	6.3284	6.9027	7.3541	7.1492	6.2682	5.2356	4.2917	4.5555	6.2282	6.8666
-50	9.2198	9.7484	9.6834	9.8334	9.7121	9.123	9.1623	9.2289	8.6392	8.4996	8.2554	8.3579	7.8	7.2801	7.8237	8.1678	7.5951	6.6335	7.3071	7.7148	9.1085	NaN	7.1115	7.2061	6.8634	6.6299	6.0033	4.4565	3.6028	3.3953	3.5116	3.5195	3.4681	2.6932	2.1849	2.4306	2.7486	2.7852	2.2815	2.0079	2.313	2.7142	2.8631	3.0382	2.3623	2.6096	3.231	2.7815	2.7843
-54	7.3791	7.6089	7.3475	6.5793	6.3351	5.6576	5.1351	5.3544	5.3193	5.3919	5.8995	6.1837	6.5886	7.3415	7.2922	6.9563	6.3224	5.73	5.6788	6.0896	6.9557	7.4814	NaN	6.1066	5.6099	4.4756	2.836	1.449	0.901	0.3642	0.5365	0.8945	0.948	0.782	0.2452	0.0988	-0.2224	-0.4705	-0.6766	-0.66	-0.3011	0.0905	0.4757	0.7949	0.6037	0.9176	1.4893	0.729	1.1302
-58	4.6391	4.2715	3.3023	3.4072	2.5278	1.5489	0.9593	1.4932	2.3341	2.7237	3.0305	3.4022	3.5354	3.4056	3.8274	4.627	4.4941	4.1655	4.9178	5.1248	4.8565	4.7201	3.7004	2.6107	2.0408	1.2692	0.7143	0.2082	-0.2549	-0.7119	-0.8261	-0.6285	-0.623	-0.9163	-1.2812	-1.2017	-1.3791	-1.5581	-1.3206	-1.7266	-1.2742	-1.1233	-1.1163	-0.9397	-0.409	-0.0269	-0.0443	-0.7046	-0.489
-62	1.6687	1.405	0.7186	0.6187	-0.0147	-0.6326	-0.7068	-0.2758	0.085	0.136	0.6854	1.6371	1.5965	1.1085	1.3766	1.9574	1.9468	1.6145	1.8906	2.0419	1.6019	0.8301	-0.0811	-0.4005	-0.5352	-0.8024	-0.7651	-0.9651	-1.3663	-1.4383	-1.2328	-1.1345	-1.2268	-1.4705	-1.536	-1.456	-1.5075	-1.4138	-1.4034	-1.2399	-1.1567	-1.2042	-1.2685	-1.0696	-0.6309	-0.5671	-0.8221	-1.0427	-1.0507
-66	-0.5479	-0.2734	-0.3827	-0.3064	-0.3748	-0.8209	-1.2194	-1.4035	-1.4873	-1.4202	-1.0889	-0.7416	-1.3259	-1.4571	-1.2448	-1.0422	-1.0187	-0.9742	-0.7433	-0.8054	-0.9412	-1.0854	-1.1734	-0.7594	-1.2475	-1.7355	-1.6791	-1.5061	-1.4674	-1.4487	-1.4469	-1.4092	-1.1132	-0.9183	-0.8486	-1.1393	-1.1898	-0.7589	-0.2654	-0.389	-0.6708	-0.8721	-1.4851	-1.4634	-1.2404	-1.3918	-1.5263	-1.3854	-1.5785
-70	-1.4143	-1.2249	-1.2712	-1.2495	-1.0573	-1.0307	-1.1714	-1.2288	-1.3301	-1.3746	-1.2175	-0.9926	-0.9384	-1.2241	-1.3568	-1.4366	-1.8082	-1.4351	-1.0439	-1.018	-1.1765	NaN	NaN	NaN	-1.8015	-1.9064	-1.5642	-1.2644	-1.0933	-1.2069	-1.3997	-1.3966	-1.0619	-0.6457	-0.2882	-0.6985	-1.0761	-0.9499	-0.9096	-0.9099	-1.0123	-1.2824	NaN	NaN	NaN	NaN	NaN	NaN	NaN
-74	-1.3923	-1.4509	-1.5551	-1.604	-1.5865	-1.4933	-1.4425	-1.3714	-1.1524	-1.1486	-1.4664	NaN	-0.7512	-0.5113	1.0452	0.3483	NaN	NaN	NaN	NaN	NaN	NaN	NaN	NaN	-1.6093	-1.5939	-1.6726	-1.7278	-1.6551	-1.6186	-1.6561	-1.4674	NaN	NaN	NaN	NaN	NaN	NaN	NaN	NaN	NaN	NaN	NaN	NaN	NaN	NaN	NaN	NaN	NaN
-78	-1.3407	-1.4381	-1.5537	-1.6566	NaN	NaN	NaN	NaN	NaN	NaN	NaN	NaN	NaN	NaN	NaN	NaN	NaN	NaN	NaN	NaN	NaN	NaN	NaN	NaN	NaN	NaN	NaN	-1.6176	-1.7859	NaN	NaN	NaN	NaN	NaN	NaN	NaN	NaN	NaN	NaN	NaN	NaN	NaN	NaN	NaN	NaN	NaN	NaN	NaN	NaN
-82	NaN	NaN	NaN	NaN	NaN	NaN	NaN	NaN	NaN	NaN	NaN	NaN	NaN	NaN	NaN	NaN	NaN	NaN	NaN	NaN	NaN	NaN	NaN	NaN	NaN	NaN	NaN	NaN	NaN	NaN	NaN	NaN	NaN	NaN	NaN	NaN	NaN	NaN	NaN	NaN	NaN	NaN	NaN	NaN	NaN	NaN	NaN	NaN	NaN
-86	NaN	NaN	NaN	NaN	NaN	NaN	NaN	NaN	NaN	NaN	NaN	NaN	NaN	NaN	NaN	NaN	NaN	NaN	NaN	NaN	NaN	NaN	NaN	NaN	NaN	NaN	NaN	NaN	NaN	NaN	NaN	NaN	NaN	NaN	NaN	NaN	NaN	NaN	NaN	NaN	NaN	NaN	NaN	NaN	NaN	NaN	NaN	NaN	NaN
[truncated: 23 more columns]

## Sheet: 50.0 m
	-177.5	-172.5	-167.5	-162.5	-157.5	-152.5	-147.5	-142.5	-137.5	-132.5	-127.5	-122.5	-117.5	-112.5	-107.5	-102.5	-97.5	-92.5	-87.5	-82.5	-77.5	-72.5	-67.5	-62.5	-57.5	-52.5	-47.5	-42.5	-37.5	-32.5	-27.5	-22.5	-17.5	-12.5	-7.5	-2.5	2.5	7.5	12.5	17.5	22.5	27.5	32.5	37.5	42.5	47.5	52.5	57.5	62.5
86	-1.592	-1.6084	-1.6184	-1.6255	-1.6247	-1.618	-1.6129	-1.6059	-1.5981	-1.594	-1.5935	-1.5956	-1.6006	-1.6063	-1.6118	-1.6161	-1.6202	-1.6308	-1.6447	-1.6551	-1.6582	-1.6579	-1.6554	-1.6482	-1.6348	-1.6219	-1.6133	-1.6026	-1.5882	-1.5848	-1.6053	-1.64	-1.6485	-1.6283	-1.6144	-1.6006	-1.5722	-1.5788	-1.6312	-1.6116	-1.6094	-1.6153	-1.4941	-1.3235	-1.2318	-1.0849	-1.0462	-1.3357	-1.4607
82	-1.6216	-1.5958	-1.5581	-1.5207	-1.4857	-1.4622	-1.4462	-1.4411	-1.4498	-1.4675	-1.4947	-1.5327	-1.5686	-1.5914	-1.5412	-1.5365	-1.3719	-1.3228	-1.6618	NaN	NaN	NaN	NaN	NaN	NaN	NaN	NaN	NaN	NaN	NaN	NaN	-1.8929	-1.8831	-1.4315	-1.1748	-0.8432	-0.5337	-0.3191	-0.1002	-0.2792	-0.6671	-1.1987	-1.4024	-1.4454	-1.3273	-1.1257	-0.9482	-0.5566	-0.4031
78	-1.5217	-1.5205	-1.5658	-1.5949	-1.6107	-1.6084	-1.5983	-1.5798	-1.5373	-1.476	-1.4521	-1.4987	-1.8021	NaN	0.127	1.3349	0.6108	NaN	NaN	NaN	-0.7774	-0.8125	NaN	NaN	NaN	NaN	NaN	NaN	NaN	NaN	NaN	NaN	-2.4776	-1.7366	-1.2656	-0.4302	0.6233	1.4948	1.9928	NaN	NaN	-0.3313	-0.7577	-0.9953	-1.0556	-0.9727	-0.9319	-0.9984	-1.2031
74	-0.952	-1.1595	-1.3881	-1.4754	-1.408	-1.3591	-1.4919	-1.6979	-1.7713	-1.6243	-1.3556	-1.2847	-1.3528	3.5421	3.4225	3.3398	1.9866	0.432	-0.2624	-0.5266	-0.6673	-0.7135	-0.9101	-1.0188	-0.9433	NaN	NaN	NaN	NaN	NaN	NaN	NaN	-1.7731	-1.454	-0.7298	0.7068	2.1414	3.1838	3.7721	3.8129	3.5302	3.1718	2.6052	1.984	1.5728	1.2957	0.8692	NaN	-1.1698
70	NaN	0.0776	-0.0802	NaN	NaN	NaN	NaN	-1.5034	-1.7974	-1.788	NaN	-1.2764	-0.9875	NaN	NaN	NaN	NaN	NaN	NaN	NaN	NaN	NaN	-1.4238	-1.1816	-0.7165	NaN	NaN	NaN	NaN	NaN	NaN	0.1582	0.1874	0.4131	1.7919	3.9667	5.5747	6.1843	6.4999	6.5941	NaN	NaN	5.0046	4.1782	3.2581	2.521	1.6732	0.071	-1.1326
66	NaN	NaN	NaN	NaN	NaN	NaN	NaN	NaN	NaN	NaN	NaN	NaN	NaN	NaN	NaN	NaN	NaN	NaN	NaN	0.1134	NaN	NaN	NaN	-2.1121	0.3583	NaN	NaN	NaN	NaN	4.597	4.8458	4.7176	3.4497	4.1171	4.1785	5.8254	7.336	7.8369	7.5335	NaN	NaN	NaN	NaN	NaN	NaN	NaN	NaN	NaN	NaN
62	1.7017	0.828	NaN	NaN	NaN	NaN	NaN	NaN	NaN	NaN	NaN	NaN	NaN	NaN	NaN	NaN	NaN	-0.2084	0.5393	0.2901	0.7339	0.1235	-0.9358	-0.025	1.8688	2.6911	NaN	NaN	6.1601	7.4235	8.0625	8.5729	8.7113	8.1454	8.1063	8.1637	8.6874	NaN	NaN	NaN	NaN	NaN	NaN	NaN	NaN	NaN	NaN	NaN	NaN
58	4.5805	4.2297	4.3455	NaN	NaN	6.3956	6.6489	7.0465	7.5159	NaN	NaN	NaN	NaN	NaN	NaN	NaN	NaN	NaN	-0.4963	0.1179	NaN	NaN	NaN	NaN	1.6981	3.4472	4.0568	4.9643	6.8962	9.4049	9.7735	9.7636	10.0483	10.3415	10.7795	NaN	8.8803	8.8291	NaN	NaN	NaN	NaN	NaN	NaN	NaN	NaN	NaN	NaN	NaN
54	4.9545	5.216	5.4922	5.9803	6.1463	6.1456	6.5247	7.3739	8.1558	8.8275	NaN	NaN	NaN	NaN	NaN	NaN	NaN	NaN	NaN	NaN	NaN	NaN	NaN	NaN	-0.1248	2.4423	5.5303	6.7629	7.1642	8.8127	10.2771	11.0196	11.4453	11.2004	NaN	NaN	9.8118	NaN	NaN	NaN	NaN	NaN	NaN	NaN	NaN	NaN	NaN	NaN	NaN
50	6.4767	6.2056	5.9733	6.2555	6.6953	7.043	7.4416	8.2512	9.1298	9.8039	9.4912	NaN	NaN	NaN	NaN	NaN	NaN	NaN	NaN	NaN	NaN	NaN	NaN	1.9582	NaN	1.2353	5.2333	10.0427	11.082	11.1957	12.0286	12.4504	12.8468	12.4288	11.0487	NaN	NaN	NaN	NaN	NaN	NaN	NaN	NaN	NaN	NaN	NaN	NaN	NaN	NaN
46	9.9746	8.4438	7.8234	8.3929	9.1008	9.3009	9.5371	10.3449	10.961	11.4187	10.7892	NaN	NaN	NaN	NaN	NaN	NaN	NaN	NaN	NaN	NaN	NaN	NaN	NaN	4.6737	2.6263	5.1567	13.2223	15.0293	14.4921	14.5795	14.3554	14.1791	14.034	13.7035	13.3012	NaN	NaN	NaN	NaN	NaN	NaN	NaN	NaN	NaN	NaN	NaN	NaN	NaN
42	12.2036	11.6229	11.1564	11.3599	11.8615	12.1631	12.7011	13.2902	13.8869	13.9411	12.2086	NaN	NaN	NaN	NaN	NaN	NaN	NaN	NaN	NaN	NaN	NaN	10.0236	12.8956	14.9263	13.2834	14.1667	18.4043	17.475	16.9014	16.6139	16.3484	15.8313	15.3751	NaN	NaN	15.5548	15.6514	15.6355	15.4173	NaN	NaN	NaN	NaN	NaN	NaN	NaN	NaN	NaN
38	15.7341	15.1999	14.7896	14.8162	15.241	15.2601	15.7466	16.1455	16.4461	16.1689	14.0785	10.8394	NaN	NaN	NaN	NaN	NaN	NaN	NaN	NaN	NaN	16.8788	20.3685	21.7431	21.9897	21.3403	20.7267	20.164	19.2902	18.7808	18.2409	18.2235	18.0251	17.4821	NaN	NaN	16.4849	17.1449	16.4973	17.2627	NaN	NaN	NaN	NaN	NaN	NaN	NaN	NaN	NaN
34	18.6801	18.0939	17.9678	18.2262	18.6592	18.8476	19.0033	19.0103	18.6957	17.9911	16.4146	13.6861	NaN	NaN	NaN	NaN	NaN	NaN	NaN	NaN	24.0433	22.6314	22.698	22.3398	22.0199	21.689	21.624	21.2773	21.0417	20.7244	20.4776	20.2449	19.7576	19.1405	18.4513	NaN	NaN	NaN	19.8905	19.2369	18.7827	19.1809	19.9602	NaN	NaN	NaN	NaN	NaN	NaN
30	21.4346	21.313	21.2202	21.3568	22.0432	22.058	21.645	21.0726	20.4032	19.5722	18.6645	17.3311	15.4935	NaN	NaN	NaN	NaN	NaN	23.0303	NaN	24.5709	23.6017	23.3286	23.2041	23.208	23.2162	23.1771	22.8156	22.7648	22.4557	22.0771	21.5596	20.871	19.2003	NaN	NaN	NaN	NaN	NaN	NaN	NaN	NaN	NaN	NaN	NaN	NaN	NaN	NaN	NaN
26	24.3943	24.2591	23.8973	23.7015	23.9862	23.6614	23.1361	22.3947	21.6856	20.8437	20.3208	19.8347	18.1471	18.7537	NaN	NaN	NaN	24.5779	24.7431	24.5701	25.8344	25.2692	25.3558	25.4168	25.3254	25.1297	24.9089	24.6669	24.2989	23.8677	23.2431	22.7152	20.8661	NaN	NaN	NaN	NaN	NaN	NaN	NaN	NaN	NaN	NaN	NaN	NaN	NaN	24.12	23.2885	NaN
22	25.7697	25.6846	25.4419	25.2984	25.0056	24.4934	23.9553	23.2409	22.8187	22.5026	22.0944	21.6903	21.2597	21.4769	21.9342	NaN	25.4874	25.4341	25.4183	27.4078	27.0165	26.9205	26.9992	27.037	26.759	26.282	25.9198	25.5001	25.0442	24.6479	24.1102	22.938	18.2343	NaN	NaN	NaN	NaN	NaN	NaN	NaN	NaN	NaN	NaN	27.0254	NaN	NaN	NaN	NaN	24.4978
18	26.8266	26.7415	26.5174	26.1868	25.7012	25.2442	24.8607	24.7996	24.4983	24.3929	24.069	23.6663	23.7553	23.4094	23.8741	24.0116	NaN	NaN	NaN	27.6469	27.9593	28.0023	27.7392	27.5956	27.3215	26.9105	26.4534	26.0207	25.5863	25.1514	24.1921	22.0472	18.1501	NaN	NaN	NaN	NaN	NaN	NaN	NaN	NaN	NaN	NaN	NaN	NaN	NaN	NaN	23.3769	25.3951
14	27.3447	27.1473	26.8133	26.3091	25.6785	25.3809	24.2341	23.3916	23.0758	22.6851	21.5731	21.4657	22.9282	23.0951	23.7854	24.6749	21.6396	17.8659	NaN	27.3065	27.4806	27.1895	27.2141	27.2297	27.5477	27.2401	26.7973	26.1712	25.171	24.0253	22.9023	20.3002	18.653	NaN	NaN	NaN	NaN	NaN	NaN	NaN	NaN	NaN	NaN	NaN	27.8811	22.1016	23.6387	24.6906	25.2496
10	27.9439	27.4654	26.9868	26.3937	25.4473	24.8676	22.9623	22.2367	21.561	20.8449	19.5766	21.123	22.5793	22.098	21.2695	19.5661	17.42	15.885	17.7734	24.8829	26.2012	NaN	NaN	NaN	27.2548	27.0095	26.4392	24.6063	23.6871	22.7458	22.6609	20.6574	20.3561	NaN	NaN	NaN	NaN	NaN	NaN	NaN	NaN	NaN	NaN	NaN	NaN	NaN	24.7028	25.9053	26.2308
6	28.6419	28.3765	28.1487	27.6358	27.3667	27.3864	27.2034	27.3843	26.7913	27.1416	26.5225	26.0621	26.0867	25.3326	24.1865	22.4327	21.4497	19.8131	20.0065	21.6074	23.0637	NaN	NaN	NaN	NaN	26.4118	26.6986	25.696	25.7826	26.5066	26.4026	24.7373	24.5012	21.5035	NaN	NaN	21.1199	NaN	NaN	NaN	NaN	NaN	NaN	NaN	NaN	NaN	25.3873	25.3055	26.581
2	28.1045	28.2024	27.8358	27.2943	26.7437	26.7924	26.686	26.536	25.3513	25.599	24.8932	23.8617	23.1988	23.1656	22.9377	21.9034	21.4149	20.2785	18.9944	18.7585	NaN	NaN	NaN	NaN	NaN	NaN	26.9247	27.2759	27.19	27.0348	26.7025	26.3193	26.1323	24.6741	22.4967	22.4052	21.5196	19.7548	NaN	NaN	NaN	NaN	NaN	NaN	NaN	25.5325	24.8127	24.8481	26.1026
-2	28.3773	28.0791	27.7593	27.7391	27.0982	26.9026	26.5406	26.0214	25.0214	24.8167	24.0082	22.4489	22.0546	21.7515	21.4167	19.2754	18.6014	17.5236	17.0236	16.0819	NaN	NaN	NaN	NaN	NaN	NaN	NaN	26.7815	26.7676	26.5515	26.003	25.7871	24.5358	22.89	21.5008	20.3075	20.1389	19.6837	NaN	NaN	NaN	NaN	NaN	NaN	26.034	25.8228	25.0479	24.5844	24.9025
-6	29.2237	28.9236	28.773	28.7569	28.2777	28.1431	27.6899	27.108	26.4893	26.4636	25.5208	24.6264	24.5327	23.7468	23.7985	22.3372	21.3902	21.0608	19.4204	16.5045	NaN	NaN	NaN	NaN	NaN	NaN	NaN	NaN	NaN	26.7498	26.3122	25.8812	24.9933	23.8807	22.6996	20.3231	18.4672	17.1534	NaN	NaN	NaN	NaN	NaN	NaN	26.0698	25.2429	24.162	23.5268	23.2536
-10	29.02	29.014	28.7956	28.7583	28.5917	28.4986	28.2974	27.8691	27.2606	26.8256	26.3557	25.8403	25.2664	24.6851	24.0054	22.7912	21.8772	21.5125	20.0641	18.2183	NaN	NaN	NaN	NaN	NaN	NaN	NaN	NaN	NaN	26.6515	26.0115	25.4532	24.667	23.7399	22.7796	21.7917	19.1799	16.2739	17.3453	NaN	NaN	NaN	NaN	NaN	26.0274	25.3571	25.3467	25.4092	24.3877
-14	27.868	27.9533	28.0004	27.9571	27.6627	27.7395	27.7174	27.4583	27.1703	26.6418	26.2528	25.641	24.816	24.0386	23.0187	22.2426	21.5184	20.7189	19.7146	18.8265	15.918	NaN	NaN	NaN	NaN	NaN	NaN	NaN	26.3409	25.9476	25.1792	24.3284	23.6999	22.6123	21.6287	20.6991	19.4212	17.2207	16.4141	NaN	NaN	NaN	NaN	NaN	26.1191	25.8219	25.5957	25.8177	25.1593
-18	25.98	26.1121	26.5095	26.2493	26.3671	26.4174	26.3503	26.2167	26.2843	25.9503	25.5935	24.9775	23.937	23.4541	22.4603	22.1879	21.3338	20.6399	19.8183	18.661	17.1586	14.4893	NaN	NaN	NaN	NaN	NaN	NaN	25.2396	25.1129	24.5654	23.3826	22.613	22.098	21.1753	20.0518	18.9368	17.4518	NaN	NaN	NaN	NaN	NaN	24.5263	25.2316	NaN	23.9813	24.663	24.1511
-22	23.8285	23.8541	23.7743	23.8854	24.4203	24.2767	24.2347	24.3725	24.1794	23.5881	22.8688	23.5434	23.0416	22.8091	22.6322	22.1107	21.2966	20.1145	18.9266	17.9141	17.3883	14.9372	NaN	NaN	NaN	NaN	NaN	NaN	23.8872	23.9198	23.1689	22.1174	21.4734	21.4707	20.6141	19.9656	19.109	17.8435	14.5246	NaN	NaN	NaN	NaN	24.5425	24.9335	NaN	23.922	23.7695	23.2871
-26	21.6855	21.3669	21.0359	21.5238	21.4215	21.4236	21.4408	22.0138	21.5769	21.6269	21.6915	21.6921	22.0838	22.1501	21.8217	20.6105	20.391	19.3493	18.4577	17.5149	16.9043	14.6088	NaN	NaN	NaN	NaN	20.586	22.2092	22.525	22.2554	21.0099	20.541	20.3434	20.1205	19.3277	18.9761	18.7303	17.8623	15.4467	NaN	NaN	NaN	NaN	22.7003	23.2589	22.75	22.5825	22.01	21.3494
-30	19.0541	18.716	18.9127	18.8535	19.4973	18.9514	19.0096	19.5406	19.947	20.2866	19.9705	19.6652	20.1071	19.9677	19.4774	18.8832	18.9964	17.9637	17.1693	16.3264	15.7732	13.7635	NaN	NaN	NaN	NaN	20.9442	20.7544	20.2052	20.5353	20.165	18.7519	18.5129	18.6401	18.0702	17.4102	17.6157	17.6385	16.8712	NaN	NaN	NaN	22.3768	21.0508	21.0099	20.399	20.2102	19.3484	18.6979
-34	16.9148	16.351	16.3568	15.994	16.5198	16.2561	16.5636	16.8189	16.9855	16.9124	16.821	17.0733	16.7398	17.0114	16.6691	16.2773	16.1196	15.6317	15.2024	15.0465	14.7422	12.827	NaN	NaN	NaN	16.9048	19.049	17.9023	17.5307	17.5705	17.7536	17.0995	17.095	17.385	16.602	16.2733	16.2184	16.1791	17.0947	15.8242	15.1112	19.0714	20.1756	18.4702	18.2918	18.0689	17.9092	17.2729	16.4745
-38	15.4328	14.5826	14.1326	13.9793	14.0934	14.0669	14.0775	14.0321	14.3199	14.2971	13.7654	13.5011	13.1735	13.9579	13.7441	13.4917	13.2144	13.4582	13.4561	13.6258	13.1558	NaN	NaN	NaN	NaN	14.6003	16.6465	15.1469	15.4667	15.4537	15.0024	14.2886	14.2579	14.625	13.9133	13.5664	12.9187	12.3245	14.975	17.5726	17.9438	17.161	18.2042	17.0296	16.7153	15.0043	15.7003	16.181	15.0358
-42	13.6632	13.4107	12.6051	12.0599	11.7167	11.5699	11.762	11.9807	12.283	12.2355	11.5506	11.3934	11.3556	11.614	11.0843	11.041	10.6862	10.8902	11.5421	12.4002	11.5751	NaN	NaN	10.1569	7.319	11.9355	12.9635	11.0063	11.0044	11.8159	11.801	10.9714	10.8617	11.7082	10.6877	10.2981	9.6063	9.4815	11.0524	13.2574	14.5454	13.3503	11.9335	11.4058	10.2892	8.8336	10.1415	12.5569	12.8349
-46	10.3731	11.0857	11.1145	10.9464	10.1318	9.899	9.7845	10.3018	10.8144	10.153	9.5097	9.2959	9.0199	8.7773	8.4572	8.7929	8.8393	8.3226	9.569	11.6473	10.2039	NaN	NaN	7.6901	7.0066	9.6933	10.2518	8.621	7.5894	7.7137	7.4139	7.1336	6.7569	6.3319	5.7199	6.2532	6.3602	6.8386	6.6851	6.2148	6.8527	7.3058	7.0177	6.058	5.1502	4.3835	4.3929	6.0315	6.7618
-50	8.8252	9.3491	9.1965	9.2473	9.1531	8.6365	8.4417	8.7412	8.2465	8.2515	7.9903	7.3846	7.1174	7.2433	7.8123	8.0753	7.5254	6.6189	7.2645	7.4694	8.7657	NaN	NaN	6.4727	6.1416	6.1762	5.7131	4.1048	3.2605	3.1303	3.3509	3.4651	3.4042	2.6961	2.2167	2.3762	2.6626	2.6728	2.2442	1.9805	2.2927	2.6656	2.8027	2.9581	2.3208	2.6291	3.1914	2.6044	2.6611
-54	7.2134	7.4043	7.0368	6.4448	6.1358	5.3934	4.9004	5.2098	4.988	5.1027	5.6019	5.6079	6.158	7.0426	7.2219	6.834	6.132	5.6974	5.6644	5.9396	6.811	7.5955	NaN	5.8348	5.2687	4.1962	2.6026	1.2158	0.6543	0.2017	0.468	0.8633	0.8704	0.705	0.2818	0.0031	-0.3338	-0.4942	-0.6902	-0.705	-0.3142	0.063	0.3577	0.7356	0.5679	0.8659	1.4442	0.6669	1.0643
-58	4.493	4.1895	3.2688	3.3412	2.3012	1.2482	0.8	1.3833	2.1249	2.5028	2.7577	3.1463	3.3067	2.9271	3.1123	3.9997	4.2286	4.1318	4.8544	5.0997	4.8475	4.6893	3.5636	2.3282	1.7648	1.047	0.5035	0.0305	-0.386	-0.8175	-0.9773	-0.806	-0.7763	-1.0228	-1.3544	-1.3703	-1.4986	-1.6206	-1.428	-1.8668	-1.4021	-1.2275	-1.4693	-1.3082	-0.7191	-0.3078	-0.3322	-0.9772	-0.7384
-62	1.5089	1.1831	0.4464	0.3029	-0.1859	-0.7158	-0.7505	-0.3656	-0.0779	-0.0451	0.427	1.4473	1.5691	1.0225	1.1008	1.6	1.7016	1.5475	1.8543	2.0068	1.5296	0.671	-0.3349	-0.6762	-0.7115	-0.8586	-0.895	-1.1274	-1.4609	-1.5441	-1.5375	-1.4145	-1.299	-1.0855	-0.628	-1.0699	-1.5707	-1.5533	-1.6654	-1.7351	-1.6175	-1.6804	-1.9211	-1.736	-1.2806	-1.1445	-1.3856	-1.5214	-1.4353
-66	-0.8611	-0.8322	-0.9553	-0.9735	-0.9284	-1.0976	-1.2967	-1.5364	-1.6864	-1.6049	-1.3532	-0.971	-1.3141	-1.4333	-1.3533	-1.2506	-1.3001	-1.2921	-1.0261	-1.0304	-1.1309	-1.2909	-1.4177	NaN	-1.4412	-1.8154	-1.6897	-1.5199	-1.4906	-1.5007	-1.6303	-1.6495	-1.2026	-0.5529	-0.1043	-0.9579	-1.5756	-1.432	-1.2089	-1.2637	-1.3768	-1.4733	-1.7392	-1.637	-1.4063	-1.4849	-1.5755	-1.4838	-1.5646
-70	-1.5259	-1.411	-1.4538	-1.536	-1.465	-1.2969	-1.2221	-1.252	-1.2981	-1.3234	-1.363	-1.3895	-1.3991	-1.4073	-1.3377	-1.381	-2.149	-1.7487	-1.4268	-1.3489	-1.3105	NaN	NaN	NaN	-1.9471	-1.9245	-1.4308	-1.1657	-1.1065	-1.2434	-1.4892	-1.5828	-1.259	-0.692	-0.0987	-0.5716	-1.4358	-1.6145	-1.5292	-1.5617	-1.6957	-1.8364	NaN	NaN	NaN	NaN	NaN	NaN	NaN
-74	-1.4482	-1.4932	-1.5976	-1.6676	-1.6668	-1.5289	-1.3772	-1.2235	-0.9604	-0.9073	-1.1984	NaN	-0.6915	0.2204	2.2878	1.7827	NaN	NaN	NaN	NaN	NaN	NaN	NaN	NaN	-1.7288	-1.6889	-1.6362	-1.6401	-1.5786	-1.5954	-1.7003	-1.5594	NaN	NaN	NaN	NaN	NaN	NaN	NaN	NaN	NaN	NaN	NaN	NaN	NaN	NaN	NaN	NaN	NaN
-78	-1.4883	-1.5659	-1.6598	-1.7255	NaN	NaN	NaN	NaN	NaN	NaN	NaN	NaN	NaN	NaN	NaN	NaN	NaN	NaN	NaN	NaN	NaN	NaN	NaN	NaN	NaN	NaN	NaN	-1.5909	-1.733	NaN	NaN	NaN	NaN	NaN	NaN	NaN	NaN	NaN	NaN	NaN	NaN	NaN	NaN	NaN	NaN	NaN	NaN	NaN	NaN
-82	NaN	NaN	NaN	NaN	NaN	NaN	NaN	NaN	NaN	NaN	NaN	NaN	NaN	NaN	NaN	NaN	NaN	NaN	NaN	NaN	NaN	NaN	NaN	NaN	NaN	NaN	NaN	NaN	NaN	NaN	NaN	NaN	NaN	NaN	NaN	NaN	NaN	NaN	NaN	NaN	NaN	NaN	NaN	NaN	NaN	NaN	NaN	NaN	NaN
-86	NaN	NaN	NaN	NaN	NaN	NaN	NaN	NaN	NaN	NaN	NaN	NaN	NaN	NaN	NaN	NaN	NaN	NaN	NaN	NaN	NaN	NaN	NaN	NaN	NaN	NaN	NaN	NaN	NaN	NaN	NaN	NaN	NaN	NaN	NaN	NaN	NaN	NaN	NaN	NaN	NaN	NaN	NaN	NaN	NaN	NaN	NaN	NaN	NaN
[truncated: 23 more columns]

## Sheet: 75.0 m
	-177.5	-172.5	-167.5	-162.5	-157.5	-152.5	-147.5	-142.5	-137.5	-132.5	-127.5	-122.5	-117.5	-112.5	-107.5	-102.5	-97.5	-92.5	-87.5	-82.5	-77.5	-72.5	-67.5	-62.5	-57.5	-52.5	-47.5	-42.5	-37.5	-32.5	-27.5	-22.5	-17.5	-12.5	-7.5	-2.5	2.5	7.5	12.5	17.5	22.5	27.5	32.5	37.5	42.5	47.5	52.5	57.5	62.5
86	-1.3453	-1.3538	-1.3615	-1.3695	-1.3755	-1.3786	-1.3793	-1.3755	-1.3729	-1.3721	-1.3779	-1.389	-1.4035	-1.4179	-1.4302	-1.4387	-1.4457	-1.4586	-1.4779	-1.4972	-1.5015	-1.5034	-1.5037	-1.4998	-1.4875	-1.4792	-1.4769	-1.47	-1.4631	-1.4669	-1.489	-1.528	-1.5338	-1.5065	-1.484	-1.4557	-1.4145	-1.4073	-1.4542	-1.4208	-1.4269	-1.4297	-1.3089	-1.0982	-1.017	-0.971	-0.9867	-1.2801	-1.4152
82	-1.2665	-1.2776	-1.2816	-1.2899	-1.2988	-1.3055	-1.3012	-1.2924	-1.2907	-1.2989	-1.3278	-1.3604	-1.3895	-1.4211	-1.3854	-1.3985	-1.2421	-0.9828	-1.5028	NaN	NaN	NaN	NaN	NaN	NaN	NaN	NaN	NaN	NaN	NaN	NaN	NaN	-1.7451	-1.059	-0.8251	-0.4454	-0.115	0.1084	0.3521	0.1799	-0.1981	-0.7253	-0.9022	-0.9277	-0.7968	-0.633	-0.6031	-0.3104	-0.2889
78	-1.2687	-1.3433	-1.4117	-1.4379	-1.4153	-1.3534	-1.2789	-1.2195	-1.1862	-1.1716	-1.2427	-1.324	-1.6803	NaN	-0.9604	-0.7494	-0.5396	NaN	NaN	NaN	-0.8907	-0.8565	NaN	NaN	NaN	NaN	NaN	NaN	NaN	NaN	NaN	NaN	-2.214	-1.4162	-0.9593	-0.1632	0.8688	1.7803	2.3086	NaN	NaN	0.0583	-0.4169	-0.7009	-0.7644	-0.6597	-0.555	-0.5187	-0.6809
74	-0.9395	-1.2011	-1.4389	-1.4304	-1.3297	-1.2274	-1.2694	-1.372	-1.396	-1.2883	-1.0795	-1.2229	-1.2427	0.3111	0.2184	0.317	0.0457	-0.242	-0.5001	-0.7146	-0.8437	-0.8335	-0.9141	-0.9087	-0.7577	NaN	NaN	NaN	NaN	NaN	NaN	NaN	-0.9474	-0.797	-0.4163	0.6431	1.9468	3.074	3.8119	3.9818	3.7395	3.317	2.6382	1.9325	1.4907	1.2887	0.9496	NaN	-0.7452
70	NaN	-0.5465	-1.3443	NaN	NaN	NaN	NaN	-1.4596	-1.6538	-1.7232	NaN	-1.4828	-0.999	NaN	NaN	NaN	NaN	NaN	NaN	NaN	NaN	NaN	-1.4477	-0.9538	-0.4208	NaN	NaN	NaN	NaN	NaN	NaN	0.1663	0.393	0.4725	1.7087	3.8284	5.4466	6.1448	6.6081	6.6328	NaN	NaN	4.8706	4.0169	3.2246	2.3867	1.6521	0.0107	-0.9411
66	NaN	NaN	NaN	NaN	NaN	NaN	NaN	NaN	NaN	NaN	NaN	NaN	NaN	NaN	NaN	NaN	NaN	NaN	NaN	0.3976	NaN	NaN	NaN	-1.8232	0.9135	NaN	NaN	NaN	NaN	5.1065	4.927	4.8033	3.4415	3.7348	3.7739	5.5382	7.3513	8.0723	NaN	NaN	NaN	NaN	NaN	NaN	NaN	NaN	NaN	NaN	NaN
62	1.4064	NaN	NaN	NaN	NaN	NaN	NaN	NaN	NaN	NaN	NaN	NaN	NaN	NaN	NaN	NaN	NaN	NaN	0.4485	0.5193	NaN	-0.1068	-1.0042	0.1764	2.3312	3.3782	NaN	NaN	6.9511	7.614	8.1788	8.794	9.1201	8.4057	8.1914	8.0693	8.7661	NaN	NaN	NaN	NaN	NaN	NaN	NaN	NaN	NaN	NaN	NaN	NaN
58	3.9037	4.1395	NaN	NaN	NaN	6.4245	6.0968	6.3325	7.036	NaN	NaN	NaN	NaN	NaN	NaN	NaN	NaN	NaN	-0.5054	-0.3516	NaN	NaN	NaN	NaN	1.818	3.4893	4.1512	5.1356	7.0611	9.6283	10.3903	10.3711	10.4033	10.6831	10.8819	NaN	8.8106	8.8218	NaN	NaN	NaN	NaN	NaN	NaN	NaN	NaN	NaN	NaN	NaN
54	4.3235	4.7527	5.4035	5.8145	5.4058	5.1315	5.3368	6.2417	7.2367	8.1938	NaN	NaN	NaN	NaN	NaN	NaN	NaN	NaN	NaN	NaN	NaN	NaN	NaN	NaN	NaN	2.3663	5.3172	6.5968	6.9986	8.6373	10.2968	11.2506	11.8139	11.7579	NaN	NaN	9.6386	NaN	NaN	NaN	NaN	NaN	NaN	NaN	NaN	NaN	NaN	NaN	NaN
50	5.5994	5.2907	5.2482	5.1736	5.3677	5.7967	6.2892	7.1303	7.9124	8.2914	8.2305	NaN	NaN	NaN	NaN	NaN	NaN	NaN	NaN	NaN	NaN	NaN	NaN	1.0494	NaN	0.5379	4.4922	9.5823	11.0464	11.177	11.9916	12.4427	12.6418	12.1966	10.9275	NaN	NaN	NaN	NaN	NaN	NaN	NaN	NaN	NaN	NaN	NaN	NaN	NaN	NaN
46	8.4904	7.1797	6.8642	7.1393	7.671	7.8836	8.1918	8.7664	9.3491	9.4795	8.9725	NaN	NaN	NaN	NaN	NaN	NaN	NaN	NaN	NaN	NaN	NaN	NaN	NaN	2.5764	0.1776	3.8765	12.6434	15.0101	14.4167	14.403	14.1751	13.749	13.4384	13.2514	12.5778	NaN	NaN	NaN	NaN	NaN	NaN	NaN	NaN	NaN	NaN	NaN	NaN	NaN
42	11.4694	10.71	10.4293	10.5159	10.4662	10.5671	10.8793	11.2354	11.9743	11.874	10.2971	NaN	NaN	NaN	NaN	NaN	NaN	NaN	NaN	NaN	NaN	NaN	9.4603	11.8708	13.7823	12.1431	13.5279	18.1723	17.15	16.4175	15.9429	15.4948	14.9035	14.4118	NaN	NaN	14.2489	14.5084	14.563	14.9141	NaN	NaN	NaN	NaN	NaN	NaN	NaN	NaN	NaN
38	14.8519	14.2998	13.8315	13.614	13.2141	13.4091	13.9013	14.3555	14.6919	14.2013	12.1635	9.7661	NaN	NaN	NaN	NaN	NaN	NaN	NaN	NaN	NaN	16.5839	19.8705	21.4785	21.8733	21.1991	20.4469	19.5702	18.4175	17.7156	17.287	17.0787	16.7772	16.3945	NaN	NaN	15.029	15.6044	15.1305	15.879	NaN	NaN	NaN	NaN	NaN	NaN	NaN	NaN	NaN
34	17.3666	17.0403	16.549	16.4793	16.541	16.9685	17.5081	17.7143	17.3052	16.3609	14.5098	11.7719	NaN	NaN	NaN	NaN	NaN	NaN	NaN	NaN	23.5406	22.2329	22.4863	22.0607	21.5032	21.0742	20.8397	20.3026	19.8459	19.3713	19.374	19.3332	18.7687	18.1402	17.2883	NaN	NaN	NaN	17.7249	17.273	17.3861	17.8647	18.055	NaN	NaN	NaN	NaN	NaN	NaN
30	19.6783	19.9865	19.6398	19.7673	20.2735	20.5043	20.5589	20.2554	19.5989	18.6251	17.3381	15.5151	13.336	NaN	NaN	NaN	NaN	NaN	21.0518	NaN	24.2218	22.7723	22.4162	22.0945	21.9414	21.897	21.9106	21.6272	21.4967	21.2759	21.0608	20.7967	19.9106	18.3248	NaN	NaN	NaN	NaN	NaN	NaN	NaN	NaN	NaN	NaN	NaN	NaN	NaN	NaN	NaN
26	23.0026	23.3129	22.7308	22.7649	23.0715	22.8344	22.5775	21.9724	21.2364	20.3913	19.5921	18.2436	15.4228	15.6513	NaN	NaN	NaN	22.8537	22.9905	23.1807	25.4908	24.1917	23.9535	23.7262	23.7826	23.9952	23.8624	23.5138	23.2224	22.7751	22.2439	21.6344	19.8818	NaN	NaN	NaN	NaN	NaN	NaN	NaN	NaN	NaN	NaN	NaN	NaN	NaN	NaN	21.7286	NaN
22	25.2863	25.0537	24.7139	24.6692	24.4777	24.112	23.6473	23.0097	22.41	21.8908	21.2382	19.9889	18.1932	17.2382	17.532	NaN	23.3589	23.674	24.2413	27.2552	26.6011	25.9774	25.8144	25.6449	25.5768	25.4572	25.1268	24.7036	24.3352	23.7623	22.4146	21.0642	17.3923	NaN	NaN	NaN	NaN	NaN	NaN	NaN	NaN	NaN	NaN	25.4411	NaN	NaN	NaN	NaN	22.5477
18	26.6254	26.4265	26.2598	26.0433	25.3092	24.5534	23.9174	23.6673	22.9429	22.5776	21.9107	21.0237	20.031	18.3987	18.6018	18.11	NaN	NaN	NaN	27.2289	27.4899	27.659	26.6924	26.5763	26.3843	25.9877	25.5837	24.9788	24.2746	23.261	21.4902	19.0025	16.164	NaN	NaN	NaN	NaN	NaN	NaN	NaN	NaN	NaN	NaN	NaN	NaN	NaN	NaN	21.183	23.4052
14	26.911	26.5113	25.7347	24.7853	23.5567	22.7469	21.0072	20.4244	19.4669	18.7905	17.8546	17.4567	18.2026	17.7965	17.9746	18.9658	17.4983	15.1916	NaN	25.7038	26.5409	26.1765	25.9123	25.86	26.1598	25.7422	25.1737	23.8637	22.3749	20.4327	18.4774	16.5637	15.9601	NaN	NaN	NaN	NaN	NaN	NaN	NaN	NaN	NaN	NaN	NaN	23.7887	19.2764	21.4682	22.7636	23.754
10	26.2707	25.4016	23.3207	22.3637	20.9585	20.069	17.9145	18.4541	16.9298	16.6682	15.8505	16.7358	17.1854	16.3994	15.6826	15.3899	14.6591	14.0401	15.639	22.7094	24.1227	NaN	NaN	NaN	25.2765	24.8559	23.2963	20.2147	19.5419	18.7122	17.6627	16.0883	16.7112	NaN	NaN	NaN	NaN	NaN	NaN	NaN	NaN	NaN	NaN	NaN	NaN	NaN	22.8708	24.4327	24.563
6	27.6646	27.3948	26.684	26.4361	26.0534	25.8333	25.6714	26.1289	25.3388	25.6518	25.1138	24.5874	23.7752	22.4533	20.7389	17.6736	16.2708	15.5936	16.0686	16.9398	16.809	NaN	NaN	NaN	NaN	25.4296	25.1151	22.9585	23.4027	24.2682	23.5382	20.2754	18.8346	16.9349	NaN	NaN	17.1616	NaN	NaN	NaN	NaN	NaN	NaN	NaN	NaN	NaN	23.3769	22.933	23.5923
2	28.0645	27.9957	27.5198	27.0908	26.5955	26.6721	26.5439	26.0828	24.8023	25.3572	24.3044	22.4317	21.6649	21.2506	20.0713	18.1335	17.333	16.9815	15.9902	15.5166	NaN	NaN	NaN	NaN	NaN	NaN	26.5026	26.8969	26.8263	26.2391	25.5969	23.4402	21.3618	19.1392	17.5051	17.3156	17.1943	17.4806	NaN	NaN	NaN	NaN	NaN	NaN	NaN	23.4687	22.2307	22.5323	23.0226
-2	28.2714	27.9922	27.5772	27.5553	26.9227	26.8426	26.4032	25.601	24.4215	24.4862	23.2295	20.9609	20.3605	18.6255	18.1259	16.1835	16.2092	16.1352	15.5548	15.0062	NaN	NaN	NaN	NaN	NaN	NaN	NaN	26.4933	26.4123	26.0109	24.6587	22.9592	21.2355	18.1254	16.8391	16.3338	16.8398	17.7895	NaN	NaN	NaN	NaN	NaN	NaN	24.196	23.0415	21.6597	21.7541	21.3711
-6	29.1567	28.7336	28.4886	28.503	28.1744	28.0528	27.5026	26.899	26.3904	26.3583	25.0345	24.1711	23.8918	22.4887	22.2253	19.9602	18.9862	17.6741	16.1227	15.033	NaN	NaN	NaN	NaN	NaN	NaN	NaN	NaN	NaN	26.5278	25.8579	24.778	23.4673	20.8703	18.8019	16.3858	15.494	16.0714	NaN	NaN	NaN	NaN	NaN	NaN	23.5333	21.5999	20.2507	19.7996	19.2085
-10	28.6293	28.6116	28.3459	28.3055	28.1651	28.0177	27.7187	27.2945	26.8444	26.395	25.9403	25.48	24.8853	24.2769	23.7005	22.1397	20.8829	19.2853	17.4393	16.1063	NaN	NaN	NaN	NaN	NaN	NaN	NaN	NaN	NaN	25.9703	25.3924	24.8201	23.967	22.8348	21.0929	19.0751	16.0665	15.0974	16.2659	NaN	NaN	NaN	NaN	NaN	24.5868	22.9727	22.5002	22.75	21.8885
-14	27.2617	27.4228	27.4481	27.4268	27.0665	27.0734	26.9537	26.7264	26.5023	26.0461	25.5611	25.0716	24.3196	23.6873	22.7315	21.9505	21.1419	20.1439	18.953	17.6507	14.8139	NaN	NaN	NaN	NaN	NaN	NaN	NaN	25.5106	25.1873	24.3069	23.1558	23.0529	22.0202	20.8985	19.3405	17.3869	15.243	15.5626	NaN	NaN	NaN	NaN	NaN	25.196	24.9539	24.8462	24.9785	24.4212
-18	25.1632	25.3265	25.7472	25.6509	25.7054	25.7443	25.6536	25.5817	25.624	25.3626	24.7539	24.4636	23.7057	23.1893	22.1912	21.9542	20.9792	20.1391	19.3346	18.0653	15.9385	13.2429	NaN	NaN	NaN	NaN	NaN	NaN	24.265	24.4607	23.6459	22.0023	22.3316	21.7483	20.6441	19.3304	18.2198	16.1376	NaN	NaN	NaN	NaN	NaN	22.8492	23.9114	NaN	24.1847	24.1317	23.8207
-22	23.0179	22.9801	22.9541	23.1203	23.811	23.5616	23.3958	23.7505	23.4282	22.9188	21.974	22.884	22.6157	22.3911	22.1886	21.6531	20.6196	19.5197	18.6054	17.5472	16.3577	13.6945	NaN	NaN	NaN	NaN	NaN	NaN	23.1516	23.1328	22.1878	21.4513	20.9791	20.9009	20.0784	19.1884	18.3565	16.9536	13.9347	NaN	NaN	NaN	NaN	22.7993	23.5116	NaN	23.2413	22.8597	22.609
-26	20.7548	20.4182	20.2102	20.7383	20.8458	20.5384	20.632	21.3365	20.7493	20.8146	21.0202	21.0042	21.3961	21.5992	21.2484	20.067	19.6799	18.771	18.0385	17.0497	15.8601	13.3358	NaN	NaN	NaN	NaN	18.7636	21.3896	21.7483	21.4212	20.2972	19.7988	19.5055	19.4674	18.8274	18.3927	18.0031	16.9196	14.6388	NaN	NaN	NaN	NaN	21.5903	22.1656	21.9319	21.417	20.8056	20.4173
-30	17.9347	17.6988	18.0718	18.0375	18.439	18.1927	18.5076	18.6259	18.7664	19.1209	18.9378	18.8642	19.0802	19.3191	18.8806	18.1108	18.135	17.4085	16.6433	15.8512	14.6556	12.4076	NaN	NaN	NaN	NaN	19.6876	19.9193	19.5079	19.8029	19.6182	18.0459	17.6185	17.8643	17.4288	16.9736	16.9673	16.651	15.7876	NaN	NaN	NaN	20.7635	20.0945	19.9683	19.1639	18.9122	18.3394	17.6008
-34	15.905	15.4186	15.5217	15.2386	15.5278	15.5279	15.747	15.8866	16.0147	16.0529	15.8926	16.1675	16.1871	16.2153	15.9363	15.2627	15.0864	14.9682	14.6437	14.2341	13.3238	11.7379	NaN	NaN	NaN	16.3085	18.3744	17.1849	16.8179	16.7729	17.071	16.1427	16.0797	16.4173	15.9156	15.7515	15.7925	15.6786	16.2389	14.3314	12.8705	17.9924	19.4798	17.7517	17.483	17.1232	17.0849	16.6677	15.5243
-38	14.7041	13.9192	13.3183	13.0063	13.0431	13.0299	13.0267	13.2276	13.2526	13.1586	12.6966	12.702	12.3343	13.1241	12.7978	12.1244	12.1538	12.5081	12.6142	12.5971	11.8948	NaN	NaN	NaN	NaN	13.802	16.0062	14.5894	15.011	14.8678	14.4388	13.6634	13.701	13.8848	13.3092	12.8923	12.3515	12.1219	14.7836	16.6833	16.7563	16.7641	17.9719	16.6922	16.152	14.5622	15.4074	15.9694	14.4449
-42	12.957	12.8687	11.9156	11.1492	10.8503	10.803	10.8725	11.1922	11.1297	10.7471	10.1394	10.5759	10.6066	10.9867	10.3528	9.8367	9.5313	9.6919	10.3133	11.5124	10.5971	NaN	NaN	9.0837	6.1033	11.0454	11.9389	10.222	10.6862	11.3982	11.3649	10.8356	10.5438	11.4439	10.5298	9.9461	9.2488	9.1996	11.3645	12.8996	13.7426	12.6607	11.509	10.847	9.8138	8.5498	9.6788	12.3502	12.3183
-46	9.7153	10.6512	10.6063	10.3017	9.535	9.2276	9.079	9.4524	9.6648	8.9915	8.5151	8.6994	8.6345	8.5831	8.248	8.3496	8.4062	7.8846	8.8544	10.9643	9.4442	NaN	NaN	6.5598	5.5563	8.7265	9.3679	7.9235	7.3808	7.2417	6.7585	6.6513	6.4482	6.2504	5.712	6.1857	6.1936	6.4033	6.5172	6.1151	6.5431	6.8268	6.9046	5.7797	4.8503	4.2405	4.1737	5.7643	5.8779
-50	8.3313	8.8541	8.6922	8.8097	8.6642	7.9103	7.9051	8.0498	7.3309	7.5628	7.7496	7.5641	7.1464	7.173	7.7667	7.748	7.2713	6.5285	7.0525	7.2385	8.4129	NaN	NaN	5.9509	5.3984	5.4998	5.1047	3.5844	2.8853	2.743	3.0415	3.2989	3.3479	2.5431	1.8938	2.0988	2.4092	2.4007	2.1182	1.8974	2.0572	2.3171	2.7767	2.8221	2.1443	2.5115	3.1035	2.5702	2.6067
-54	6.879	7.0513	6.5096	6.0977	5.7013	4.6877	4.4271	4.9181	4.6424	4.7013	5.5259	5.5354	6.0889	6.9966	6.7842	6.1694	5.6582	5.5719	5.5327	5.7004	6.5144	7.2931	NaN	5.5831	4.9145	3.7827	2.1542	0.7784	0.2971	-0.05	0.289	0.7608	0.8493	0.6414	0.1242	-0.1732	-0.3943	-0.5937	-0.8179	-0.7407	-0.3904	-0.039	0.3577	0.6912	0.495	0.7032	1.14	0.6001	1.0591
-58	4.2766	4.0774	3.1143	3.2868	2.0994	0.7147	0.2536	0.789	1.4434	1.8461	2.4581	2.7405	2.9212	2.7773	3.018	4.005	4.1802	4.0152	4.6579	4.9023	4.6967	4.4877	3.2938	1.9394	1.3429	0.6989	0.1911	-0.2528	-0.5344	-0.9233	-1.1428	-0.9493	-0.8419	-1.0674	-1.3637	-1.4017	-1.4739	-1.5724	-1.5825	-2.006	-1.3178	-0.9614	-1.2844	-1.3449	-0.9148	-0.5297	-0.6153	-1.134	-0.9837
-62	1.3308	0.9347	0.245	0.1973	-0.3702	-1.0228	-1.1081	-0.8551	-0.6136	-0.4003	0.2481	0.9986	0.9841	0.6027	0.8122	1.3934	1.5401	1.4603	1.7333	1.8358	1.3335	0.428	-0.6025	-0.945	-0.8509	-0.9069	-1.019	-1.2655	-1.4954	-1.5759	-1.6322	-1.4498	-1.3546	-1.6615	-1.8105	-1.721	-1.5536	-1.3945	-1.5644	-1.68	-1.4813	-1.4705	-1.7078	-1.7747	-1.696	-1.4851	-1.5753	-1.6216	-1.613
-66	-0.9529	-1.029	-1.108	-1.2786	-1.4469	-1.5892	-1.5383	-1.6138	-1.8013	-1.769	-1.4753	-1.1528	-1.5215	-1.4797	-1.3756	-1.3482	-1.4127	-1.3754	-1.1874	-1.2808	-1.4164	-1.5415	-1.5682	NaN	-1.4203	-1.779	-1.7246	-1.5702	-1.5408	-1.538	-1.6114	-1.5713	-1.3491	-1.2939	-1.3092	-1.4395	-1.4395	-1.3735	-1.3433	-1.2622	-1.2802	-1.4463	-1.7081	-1.6136	-1.432	-1.5271	-1.6014	-1.3257	-1.3647
-70	-1.4436	-1.4343	-1.5796	-1.7432	-1.706	-1.4497	-1.1366	-1.1332	-1.2702	-1.361	-1.3774	-1.4932	-1.6298	-1.5785	-1.3547	-1.278	-1.9541	-1.6513	-1.372	-1.3402	-1.4095	NaN	NaN	NaN	-2.0877	-1.8821	-1.4349	-1.1822	-1.1274	-1.2377	-1.4762	-1.5886	-1.352	-0.9317	-0.501	-0.7894	-1.3484	-1.7186	-1.7111	-1.6311	-1.6072	-1.7087	NaN	NaN	NaN	NaN	NaN	NaN	NaN
-74	-1.3724	-1.4588	-1.6362	-1.7329	-1.7243	-1.5596	-1.3662	-1.1705	-0.9042	-0.8418	-1.0602	NaN	-0.4062	0.3877	2.4517	2.1206	NaN	NaN	NaN	NaN	NaN	NaN	NaN	NaN	-1.7255	-1.6817	-1.6226	-1.5917	-1.5454	-1.5911	-1.7223	-1.6686	NaN	NaN	NaN	NaN	NaN	NaN	NaN	NaN	NaN	NaN	NaN	NaN	NaN	NaN	NaN	NaN	NaN
-78	-1.5289	-1.6184	-1.742	-1.8245	NaN	NaN	NaN	NaN	NaN	NaN	NaN	NaN	NaN	NaN	NaN	NaN	NaN	NaN	NaN	NaN	NaN	NaN	NaN	NaN	NaN	NaN	NaN	-1.6156	-1.7104	NaN	NaN	NaN	NaN	NaN	NaN	NaN	NaN	NaN	NaN	NaN	NaN	NaN	NaN	NaN	NaN	NaN	NaN	NaN	NaN
-82	NaN	NaN	NaN	NaN	NaN	NaN	NaN	NaN	NaN	NaN	NaN	NaN	NaN	NaN	NaN	NaN	NaN	NaN	NaN	NaN	NaN	NaN	NaN	NaN	NaN	NaN	NaN	NaN	NaN	NaN	NaN	NaN	NaN	NaN	NaN	NaN	NaN	NaN	NaN	NaN	NaN	NaN	NaN	NaN	NaN	NaN	NaN	NaN	NaN
-86	NaN	NaN	NaN	NaN	NaN	NaN	NaN	NaN	NaN	NaN	NaN	NaN	NaN	NaN	NaN	NaN	NaN	NaN	NaN	NaN	NaN	NaN	NaN	NaN	NaN	NaN	NaN	NaN	NaN	NaN	NaN	NaN	NaN	NaN	NaN	NaN	NaN	NaN	NaN	NaN	NaN	NaN	NaN	NaN	NaN	NaN	NaN	NaN	NaN
[truncated: 23 more columns]

## Sheet: 100.0 m
	-177.5	-172.5	-167.5	-162.5	-157.5	-152.5	-147.5	-142.5	-137.5	-132.5	-127.5	-122.5	-117.5	-112.5	-107.5	-102.5	-97.5	-92.5	-87.5	-82.5	-77.5	-72.5	-67.5	-62.5	-57.5	-52.5	-47.5	-42.5	-37.5	-32.5	-27.5	-22.5	-17.5	-12.5	-7.5	-2.5	2.5	7.5	12.5	17.5	22.5	27.5	32.5	37.5	42.5	47.5	52.5	57.5	62.5
86	-1.4144	-1.4232	-1.4329	-1.4404	-1.4436	-1.4418	-1.4364	-1.4218	-1.4096	-1.4032	-1.4058	-1.4163	-1.4307	-1.4455	-1.456	-1.4604	-1.4602	-1.4656	-1.4709	-1.5016	-1.4943	-1.483	-1.4695	-1.4525	-1.43	-1.4174	-1.4202	-1.4262	-1.4422	-1.466	-1.5	-1.5333	-1.5286	-1.5064	-1.4774	-1.4354	-1.3814	-1.3527	-1.3716	-1.3211	-1.3112	-1.2867	-1.1367	-0.8902	-0.7579	-0.6766	-0.5817	-0.7948	-0.9761
82	-1.3178	-1.3463	-1.3703	-1.3957	-1.4146	-1.4227	-1.4104	-1.3801	-1.3495	-1.328	-1.3305	-1.3539	-1.3805	-1.4372	-1.3856	-1.4006	-1.141	-1.2637	-1.3505	NaN	NaN	NaN	NaN	NaN	NaN	NaN	NaN	NaN	NaN	NaN	NaN	NaN	-1.5128	-0.8022	-0.5797	-0.1571	0.2101	0.4689	0.7473	0.5947	0.2534	-0.3011	-0.4829	-0.5051	-0.3753	-0.2143	-0.2066	0.0831	0.1368
78	-1.3034	-1.3582	-1.4197	-1.43	-1.4122	-1.3802	-1.3456	-1.3113	-1.2813	-1.2451	-1.2613	-1.4259	-1.6156	NaN	-1.3365	-1.3704	NaN	NaN	NaN	NaN	-0.93	-0.9337	NaN	NaN	NaN	NaN	NaN	NaN	NaN	NaN	NaN	NaN	-2.0486	-1.087	-0.5631	0.2069	1.2126	2.1163	2.6446	NaN	NaN	0.3135	-0.1612	-0.4819	-0.5503	-0.4322	-0.2834	-0.3362	-0.6768
74	-1.0676	-1.0596	-1.4424	-1.2782	-1.2464	-1.1975	-1.277	-1.3887	-1.4089	-1.3337	-1.1065	-1.3011	-1.2209	-0.5915	-0.7135	-0.5826	-0.6496	-0.5611	-0.66	-0.8443	-0.9303	-0.8469	-0.8106	-0.7454	-0.3158	NaN	NaN	NaN	NaN	NaN	NaN	NaN	-0.267	-0.3059	-0.0716	0.752	1.9748	3.1331	3.9349	4.1378	3.905	3.3863	2.6042	1.8167	1.3427	1.2098	0.5346	NaN	-0.5971
70	NaN	NaN	NaN	NaN	NaN	NaN	NaN	-1.397	-1.5035	-1.5711	NaN	-1.369	NaN	NaN	NaN	NaN	NaN	NaN	NaN	NaN	NaN	NaN	NaN	-0.4983	0.1715	NaN	NaN	NaN	NaN	NaN	NaN	0.2889	0.4474	0.4663	1.7055	3.8096	5.4022	6.1362	6.5986	6.6432	NaN	NaN	4.7133	3.9606	2.7879	2.5265	NaN	NaN	-1.0842
66	NaN	NaN	NaN	NaN	NaN	NaN	NaN	NaN	NaN	NaN	NaN	NaN	NaN	NaN	NaN	NaN	NaN	NaN	NaN	0.0414	NaN	NaN	NaN	NaN	1.3238	NaN	NaN	NaN	NaN	5.226	4.9907	4.819	3.259	3.2271	3.3637	5.1693	7.2052	8.0961	NaN	NaN	NaN	NaN	NaN	NaN	NaN	NaN	NaN	NaN	NaN
62	NaN	NaN	NaN	NaN	NaN	NaN	NaN	NaN	NaN	NaN	NaN	NaN	NaN	NaN	NaN	NaN	NaN	NaN	0.0774	0.2245	NaN	-0.5088	-1.0906	0.3939	2.7288	3.9034	NaN	NaN	6.8306	7.4898	8.0357	8.7592	9.3417	8.6648	8.2192	7.8733	8.6734	NaN	NaN	NaN	NaN	NaN	NaN	NaN	NaN	NaN	NaN	NaN	NaN
58	3.7194	4.378	NaN	NaN	NaN	5.7083	5.6703	5.8406	6.655	NaN	NaN	NaN	NaN	NaN	NaN	NaN	NaN	NaN	-0.3526	-1.0394	NaN	NaN	NaN	NaN	2.1261	3.6483	4.0985	4.8496	6.6021	9.1235	9.944	10.1966	10.3963	10.6751	10.865	NaN	8.5051	8.2629	NaN	NaN	NaN	NaN	NaN	NaN	NaN	NaN	NaN	NaN	NaN
54	3.8661	4.3966	5.0592	5.378	4.9137	4.471	4.4081	5.2367	6.4782	7.6029	NaN	NaN	NaN	NaN	NaN	NaN	NaN	NaN	NaN	NaN	NaN	NaN	NaN	NaN	NaN	2.3347	4.8981	6.0388	6.516	8.1596	9.8887	11.0174	11.647	11.6824	NaN	NaN	NaN	NaN	NaN	NaN	NaN	NaN	NaN	NaN	NaN	NaN	NaN	NaN	NaN
50	4.4161	4.3268	4.2921	4.2116	4.3306	4.6149	5.0079	5.7271	6.5716	7.2833	7.6487	NaN	NaN	NaN	NaN	NaN	NaN	NaN	NaN	NaN	NaN	NaN	NaN	NaN	NaN	-0.0264	4.0038	9.1344	10.9305	11.0815	11.8473	12.2417	12.2953	11.8619	NaN	NaN	NaN	NaN	NaN	NaN	NaN	NaN	NaN	NaN	NaN	NaN	NaN	NaN	NaN
46	6.3586	5.9728	5.906	6.1939	6.6526	6.8225	6.952	7.3184	7.8995	8.098	8.0928	NaN	NaN	NaN	NaN	NaN	NaN	NaN	NaN	NaN	NaN	NaN	NaN	NaN	1.6587	NaN	3.2996	12.3924	14.9251	14.2299	13.9915	13.5571	13.0983	12.7931	12.6579	12.3814	NaN	NaN	NaN	NaN	NaN	NaN	NaN	NaN	NaN	NaN	NaN	NaN	NaN
42	10.2539	9.8813	9.609	9.5689	9.4184	9.3067	9.4802	9.9039	10.4019	10.0385	9.1351	NaN	NaN	NaN	NaN	NaN	NaN	NaN	NaN	NaN	NaN	NaN	9.0275	11.7559	13.595	12.007	13.2499	17.7618	16.6391	15.7287	14.9897	14.3473	13.7901	13.5018	NaN	NaN	13.581	13.7965	14.0655	14.5184	NaN	NaN	NaN	NaN	NaN	NaN	NaN	NaN	NaN
38	13.5579	13.1486	12.5651	12.1608	11.701	11.6556	12.018	12.6155	13.0067	12.293	10.6745	9.2248	NaN	NaN	NaN	NaN	NaN	NaN	NaN	NaN	NaN	16.1597	19.1652	20.8952	21.3246	20.655	19.7762	18.726	17.3513	16.5621	15.9965	15.6353	15.3364	15.1502	NaN	NaN	14.1981	14.6693	14.5064	15.1497	NaN	NaN	NaN	NaN	NaN	NaN	NaN	NaN	NaN
34	15.8428	15.5047	14.8154	14.4544	14.4213	14.9047	15.5054	15.9191	15.7943	14.713	12.7502	10.551	NaN	NaN	NaN	NaN	NaN	NaN	NaN	NaN	22.2445	21.3599	21.6415	21.1985	20.6244	20.0534	19.677	18.994	18.4144	17.869	17.7871	17.6362	17.2435	16.6806	16.2198	NaN	NaN	NaN	16.7696	16.1894	16.4856	16.9163	16.994	NaN	NaN	NaN	NaN	NaN	NaN
30	17.8036	17.9716	17.6406	17.6867	18.2063	18.5588	18.7824	18.7281	18.1738	17.2883	15.8897	13.9084	11.9759	NaN	NaN	NaN	NaN	NaN	19.35	NaN	23.324	21.5663	20.9529	20.5926	20.5231	20.3403	20.2416	20.0087	19.8692	19.6728	19.5281	19.0465	18.4084	17.1191	NaN	NaN	NaN	NaN	NaN	NaN	NaN	NaN	NaN	NaN	NaN	NaN	NaN	NaN	NaN
26	20.9704	21.1981	20.7677	20.9958	21.3969	21.2311	20.9793	20.4798	19.9729	19.1845	18.2961	16.7139	13.6219	NaN	NaN	NaN	NaN	20.9754	21.4938	21.5564	24.7054	22.8308	22.2641	22.0333	22.1625	22.2979	22.1805	21.6659	21.3337	21.0429	20.4923	19.9191	18.7338	NaN	NaN	NaN	NaN	NaN	NaN	NaN	NaN	NaN	NaN	NaN	NaN	NaN	NaN	20.9075	NaN
22	23.6386	23.3504	23.0202	23.1877	23.1203	22.7974	22.2198	21.5019	21.0883	20.3553	19.4023	18.1834	15.6617	14.7037	15.1746	NaN	22.0105	21.8557	NaN	26.434	25.6704	24.5523	24.2654	24.0957	23.9671	23.9568	23.6652	22.9843	22.5811	22.0713	20.5833	19.4606	16.6491	NaN	NaN	NaN	NaN	NaN	NaN	NaN	NaN	NaN	NaN	24.2228	NaN	NaN	NaN	NaN	21.2583
18	25.482	25.1897	25.066	24.8177	23.9506	23.0224	21.9029	21.5884	20.8613	20.1437	19.442	18.1361	16.5861	15.1968	15.2706	15.0061	NaN	NaN	NaN	26.1551	26.3557	26.423	25.1825	25.1058	24.8759	24.5537	24.0662	23.3251	22.5576	21.4426	19.3898	17.281	15.056	NaN	NaN	NaN	NaN	NaN	NaN	NaN	NaN	NaN	NaN	NaN	NaN	NaN	NaN	19.793	21.6817
14	25.3289	24.7158	23.7547	22.3393	21.0305	20.147	18.4238	18.0155	16.788	15.9642	15.42	14.6901	15.1456	14.8371	14.8075	15.3077	14.8289	14.0744	NaN	NaN	25.0958	24.6381	24.2174	24.2293	24.4391	23.7291	22.9236	21.3603	19.806	18.0853	16.0823	14.9245	14.8195	NaN	NaN	NaN	NaN	NaN	NaN	NaN	NaN	NaN	NaN	NaN	NaN	17.472	19.6748	21.1557	21.8685
10	22.9138	21.8087	19.3326	18.3451	17.0459	16.0739	14.8869	16.0137	14.2754	13.9514	13.6136	14.1482	14.2491	13.7899	13.5723	13.5978	13.4031	13.321	14.5333	20.3535	22.0026	NaN	NaN	NaN	22.8827	22.2066	19.865	16.5231	15.8821	15.6878	14.9239	14.4847	15.4105	NaN	NaN	NaN	NaN	NaN	NaN	NaN	NaN	NaN	NaN	NaN	NaN	NaN	21.1805	22.4883	21.9917
6	25.6058	25.2983	24.5449	24.7379	24.2103	23.5051	23.8073	24.6187	23.2257	22.6888	21.8735	21.3386	19.8613	17.884	16.2277	14.5086	14.1505	14.2418	14.7445	15.3401	15.3629	NaN	NaN	NaN	NaN	24.3508	23.2199	20.5019	20.1399	20.5399	18.9136	16.5905	15.9902	15.8383	NaN	NaN	16.2176	NaN	NaN	NaN	NaN	NaN	NaN	NaN	NaN	NaN	21.2484	20.258	20.2125
2	27.8371	27.4914	26.9031	26.8024	26.2079	26.2174	26.0985	25.4903	23.5843	23.7216	22.0304	19.3665	18.6202	17.5054	16.5394	15.2736	15.203	15.5017	15.0416	14.777	NaN	NaN	NaN	NaN	NaN	NaN	24.7486	25.9225	24.7242	22.7053	20.1298	18.3195	17.2818	15.8257	15.5688	15.7189	15.7885	16.3166	NaN	NaN	NaN	NaN	NaN	NaN	NaN	20.5747	19.6417	19.8377	19.9696
-2	28.0387	27.6345	27.2519	27.1562	26.4627	26.434	26.043	24.8116	23.3873	23.5625	21.1982	17.4415	17.0004	15.4732	15.4515	14.4396	14.7057	14.9997	14.7896	14.5728	NaN	NaN	NaN	NaN	NaN	NaN	NaN	25.9024	24.8417	22.5633	19.2012	17.5978	17.4419	15.4204	14.875	15.0055	15.3571	16.4517	NaN	NaN	NaN	NaN	NaN	NaN	21.5923	19.6551	18.7752	19.1769	19.0114
-6	28.4834	28.199	28.0041	28.0245	27.8412	27.6087	27.2275	26.5827	25.8133	25.9124	23.9695	22.3555	21.4186	19.2006	18.8955	16.8351	15.542	14.8863	14.4583	14.4323	NaN	NaN	NaN	NaN	NaN	NaN	NaN	NaN	NaN	25.3631	23.8526	21.5786	19.9814	17.8634	15.8849	14.7199	14.6712	15.4892	NaN	NaN	NaN	NaN	NaN	NaN	20.4102	18.0278	17.2587	17.0161	16.4687
-10	27.4212	27.6265	27.4977	27.5102	27.4617	27.2718	26.9601	26.6006	26.094	25.8356	25.1067	24.5434	24.0006	22.6554	22.0394	20.2256	18.307	16.586	14.9778	14.4534	NaN	NaN	NaN	NaN	NaN	NaN	NaN	NaN	NaN	25.0727	24.5489	23.6401	22.451	20.8487	18.2488	15.8752	14.3877	14.4518	15.5171	NaN	NaN	NaN	NaN	NaN	22.7083	20.6341	19.7456	20.0482	19.619
-14	26.2942	26.6277	26.6677	26.6731	26.3737	26.3704	26.2008	26.0341	25.8607	25.5033	24.9872	24.4392	23.6498	22.8781	22.1597	21.4878	20.7418	19.5798	17.9	16.1046	13.7343	NaN	NaN	NaN	NaN	NaN	NaN	NaN	24.5326	24.5195	23.6229	22.6973	22.5653	21.3202	19.8043	17.2837	15.1253	13.945	15.1627	NaN	NaN	NaN	NaN	NaN	24.2778	24.147	23.4079	23.5742	23.2225
-18	24.4647	24.6279	24.9658	24.9568	25.0474	25.1557	25.0229	24.9345	25.0682	24.8409	24.2841	23.8245	23.0042	22.666	21.8443	21.6123	20.7362	19.8121	19.1171	17.688	14.7726	12.7027	NaN	NaN	NaN	NaN	NaN	NaN	23.1027	23.9097	23.094	21.7542	21.978	21.2618	20.1548	18.7836	17.1674	14.9649	NaN	NaN	NaN	NaN	NaN	21.3415	22.6527	NaN	23.3815	23.4384	23.2243
-22	22.3643	22.3591	22.3576	22.4063	23.1216	22.9752	22.837	23.1423	22.9095	22.4156	21.8556	22.3592	22.1044	21.9947	21.9228	21.4306	20.359	19.2387	18.3593	17.2744	15.3359	12.9059	NaN	NaN	NaN	NaN	NaN	NaN	22.2722	22.5149	21.5664	20.9481	20.65	20.5382	19.639	18.7716	17.7787	16.0898	13.4729	NaN	NaN	NaN	NaN	21.2373	22.1744	NaN	22.5317	22.2085	22.0395
-26	19.9943	19.8276	19.5952	20.0668	20.2485	19.9633	20.1513	20.6918	20.2723	20.3351	20.3084	20.4496	20.8805	21.1454	20.7623	19.6886	19.2036	18.4896	17.7769	16.7171	14.9129	12.397	NaN	NaN	NaN	NaN	NaN	20.5618	20.7477	20.5648	19.7057	19.2145	19.1579	19.0478	18.3767	17.8975	17.4045	16.3456	14.0795	NaN	NaN	NaN	NaN	20.0971	20.9545	21.0026	20.3027	19.9268	19.6344
-30	17.2884	17.0918	17.4867	17.6258	18.1088	17.604	17.6481	17.8924	18.1135	18.5217	18.2421	18.3	18.6096	19.0087	18.4276	17.7008	17.5997	16.9656	16.3535	15.4299	13.7903	11.5762	NaN	NaN	NaN	NaN	18.9058	19.215	18.7759	19.2095	19.2245	17.4391	17.1377	17.3532	16.8939	16.4081	16.4804	16.2008	15.0253	NaN	NaN	NaN	20.0057	19.3145	19.1812	18.1202	17.8583	17.688	16.8956
-34	15.3599	14.7753	15.1007	15.2358	15.3386	15.0521	15.0826	15.3002	15.4466	15.5135	15.3806	15.6902	15.8889	15.7456	15.5887	14.6989	14.5535	14.5196	14.2959	13.7162	12.593	11.1897	NaN	NaN	NaN	15.9081	17.8168	16.7188	16.3123	16.1782	16.4816	15.463	15.5026	15.865	15.3666	15.0876	15.4639	15.5147	15.5456	13.5972	NaN	17.043	18.7961	17.5455	17.1555	16.497	16.5522	16.2575	15.1665
-38	14.2351	13.3058	12.7438	12.4599	12.3526	12.289	12.3138	12.5981	12.7871	12.7417	12.2307	12.0129	12.0015	12.4737	11.9085	11.4219	11.3825	11.8216	12.0686	12.0185	11.2738	NaN	NaN	NaN	NaN	13.3055	15.4275	14.1072	14.5988	14.4529	13.9982	13.4263	13.3804	13.5462	13.0218	12.2646	11.8682	11.7102	14.1365	15.8626	15.9718	15.8853	16.8273	16.3037	15.6333	14.3643	15.1833	15.8215	14.489
-42	12.4976	12.3822	11.4494	10.5457	10.2492	10.1304	10.1861	10.552	10.3824	10.1098	9.5177	9.5064	9.6696	10.171	9.5101	9.1907	9.0165	9.0775	9.7147	10.9268	10.0919	NaN	NaN	NaN	4.5833	10.4017	11.2536	9.6508	10.2204	10.9043	10.8311	10.6701	10.1694	11.0166	10.2944	9.5987	8.8558	8.8043	10.931	12.4986	12.8424	11.9257	11.0546	10.2656	9.3029	8.3006	8.9944	12.0468	12.327
-46	9.2146	10.2127	10.3277	9.9784	9.2776	8.8503	9.135	9.6677	8.8052	8.2019	7.7247	7.7072	7.7632	7.9224	7.7338	7.6494	7.554	7.2329	9.0533	10.168	8.9569	NaN	NaN	6.1623	4.9185	7.8415	8.5816	7.4047	7.1253	6.7801	5.952	6.0244	6.0245	5.8897	5.4165	5.9838	5.9781	6.0146	6.2314	5.9474	6.1056	6.385	6.7681	5.3784	4.4107	3.9747	3.6975	5.3483	5.7316
-50	7.9071	8.4506	8.4512	8.6322	8.5021	7.7689	7.8945	7.8893	7.0299	7.2353	7.2545	7.1178	6.815	6.9717	7.6465	7.294	6.6608	6.1595	6.9387	6.6485	7.8302	NaN	NaN	5.5254	4.996	4.88	4.476	3.1192	2.5338	2.3177	2.5039	2.9233	3.1346	2.5233	1.7871	1.982	2.2279	2.095	1.9158	1.7646	1.8235	2.061	2.5643	2.4921	1.9285	2.4006	2.9158	2.4003	2.5304
-54	6.5767	6.7741	6.1975	5.7862	5.414	4.4121	4.1334	4.6428	4.4257	4.4485	5.2985	5.3707	5.9184	7.0338	7.076	6.3181	5.6331	5.4299	5.4268	5.4223	6.18	7.3878	NaN	5.3524	4.6536	3.4273	1.756	0.5006	0.0983	-0.1894	0.1302	0.6257	0.6911	0.4754	-0.0919	-0.3478	-0.5509	-0.694	-0.8254	-0.7382	-0.5263	-0.2452	0.2607	0.4821	0.2025	0.4371	0.8592	0.3855	0.9331
-58	4.0722	3.8042	2.8924	3.0673	1.9558	0.4466	-0.0867	0.474	1.1338	1.5517	2.3525	2.6672	2.7733	2.68	2.9113	3.7703	4.0205	3.9169	4.5513	4.7334	4.5252	4.367	3.0932	1.6591	1.0856	0.5284	0.0484	-0.3481	-0.5556	-0.8787	-1.0949	-0.9233	-0.8255	-1.0459	-1.2116	-1.1406	-1.3363	-1.5557	-1.587	-1.9258	-1.3886	-0.9927	-1.1578	-1.3635	-1.1628	-0.8263	-0.8955	-1.3133	-1.112
-62	1.2266	0.8448	0.1464	0.104	-0.363	-1.0737	-1.421	-1.2484	-0.8345	-0.4146	0.3129	1.0036	0.9696	0.5602	0.7584	1.3301	1.4664	1.3351	1.5306	1.6529	1.2418	0.4512	-0.5467	-0.932	-0.845	-0.8928	-1.0173	-1.2505	-1.4264	-1.4636	-1.4611	-1.2863	-1.1692	-1.0631	-0.4671	-0.6107	-1.1049	-1.2009	-1.3101	-0.9796	-0.9631	-1.0807	-1.3757	-1.2659	-1.1294	-1.1915	-1.3053	-1.1467	-1.1316
-66	-0.6448	-0.6516	-0.7943	-1.2219	-1.3699	-1.4079	-1.4985	-1.6534	-1.7019	-1.5415	-1.229	-0.9064	-1.2729	-1.3469	-1.3331	-1.327	-1.4217	-1.4371	-1.2596	-1.3086	-1.3098	-1.2444	-1.2154	NaN	-1.3317	-1.6961	-1.6019	-1.5029	-1.5147	-1.4818	-1.3509	-1.1873	-1.0138	-0.7761	-0.2968	-0.5666	-0.9574	-1.1449	-0.8745	-0.0461	0.147	-0.328	-1.2113	-1.1191	-0.9138	-1.3632	-1.4156	-0.9176	-0.9277
-70	-1.0872	-1.1006	-1.3626	-1.6489	-1.5875	-1.3824	-1.2392	-1.1843	-1.0749	-0.964	-1.0084	-1.2596	-1.4272	-1.3993	-1.2206	-1.1477	-1.8347	-1.4697	-1.1952	-1.2865	-1.4685	NaN	NaN	NaN	-1.8743	-1.7423	-1.368	-1.1887	-1.0448	-1.1228	-1.2921	-1.4138	-1.3176	-1.0553	-0.5221	-0.5761	-1.1431	-1.834	-1.6251	-0.8324	-0.5415	-0.8651	NaN	NaN	NaN	NaN	NaN	NaN	NaN
-74	-1.1094	-1.264	-1.5532	-1.7057	-1.6816	-1.5398	-1.4338	-1.2222	-1.0276	-0.8643	NaN	NaN	-0.3427	0.2769	2.0491	1.8517	NaN	NaN	NaN	NaN	NaN	NaN	NaN	NaN	-1.6748	-1.6094	-1.575	-1.5522	-1.5577	-1.6416	-1.7533	-1.7698	NaN	NaN	NaN	NaN	NaN	NaN	NaN	NaN	NaN	NaN	NaN	NaN	NaN	NaN	NaN	NaN	NaN
-78	-1.4645	-1.5746	-1.7441	-1.8852	NaN	NaN	NaN	NaN	NaN	NaN	NaN	NaN	NaN	NaN	NaN	NaN	NaN	NaN	NaN	NaN	NaN	NaN	NaN	NaN	NaN	NaN	NaN	-1.6294	-1.722	NaN	NaN	NaN	NaN	NaN	NaN	NaN	NaN	NaN	NaN	NaN	NaN	NaN	NaN	NaN	NaN	NaN	NaN	NaN	NaN
-82	NaN	NaN	NaN	NaN	NaN	NaN	NaN	NaN	NaN	NaN	NaN	NaN	NaN	NaN	NaN	NaN	NaN	NaN	NaN	NaN	NaN	NaN	NaN	NaN	NaN	NaN	NaN	NaN	NaN	NaN	NaN	NaN	NaN	NaN	NaN	NaN	NaN	NaN	NaN	NaN	NaN	NaN	NaN	NaN	NaN	NaN	NaN	NaN	NaN
-86	NaN	NaN	NaN	NaN	NaN	NaN	NaN	NaN	NaN	NaN	NaN	NaN	NaN	NaN	NaN	NaN	NaN	NaN	NaN	NaN	NaN	NaN	NaN	NaN	NaN	NaN	NaN	NaN	NaN	NaN	NaN	NaN	NaN	NaN	NaN	NaN	NaN	NaN	NaN	NaN	NaN	NaN	NaN	NaN	NaN	NaN	NaN	NaN	NaN
[truncated: 23 more columns]

## Sheet: 125.0 m
	-177.5	-172.5	-167.5	-162.5	-157.5	-152.5	-147.5	-142.5	-137.5	-132.5	-127.5	-122.5	-117.5	-112.5	-107.5	-102.5	-97.5	-92.5	-87.5	-82.5	-77.5	-72.5	-67.5	-62.5	-57.5	-52.5	-47.5	-42.5	-37.5	-32.5	-27.5	-22.5	-17.5	-12.5	-7.5	-2.5	2.5	7.5	12.5	17.5	22.5	27.5	32.5	37.5	42.5	47.5	52.5	57.5	62.5
86	-1.3913	-1.4261	-1.4492	-1.4676	-1.479	-1.4764	-1.4818	-1.4753	-1.4712	-1.4757	-1.4883	-1.5028	-1.519	-1.535	-1.5444	-1.5446	-1.5353	-1.5212	-1.5111	-1.5564	-1.5368	-1.5081	-1.476	-1.4369	-1.3888	-1.3569	-1.3545	-1.3569	-1.3683	-1.3951	-1.4306	-1.4551	-1.4229	-1.3984	-1.3538	-1.2891	-1.2111	-1.1512	-1.1384	-1.0643	-1.0181	-0.9646	-0.8073	-0.5528	-0.3517	-0.2151	-0.0405	-0.1124	-0.2698
82	-1.2435	-1.2705	-1.2879	-1.3059	-1.315	-1.3125	-1.2884	-1.2509	-1.2222	-1.2221	-1.2616	-1.3266	-1.3865	-1.4473	-1.3919	-1.3962	-1.0299	-1.0325	-1.0336	NaN	NaN	NaN	NaN	NaN	NaN	NaN	NaN	NaN	NaN	NaN	NaN	NaN	-1.0834	-0.2397	-0.307	0.1216	0.4911	0.7572	1.0435	0.914	0.6416	0.464	-0.165	-0.2431	-0.1821	-0.0725	0.0291	0.325	0.3309
78	-1.2851	-1.3217	-1.3973	-1.4174	-1.4268	-1.4102	-1.3757	-1.3276	-1.2722	-1.2246	-1.2665	-1.4802	-1.7062	NaN	-1.3612	-1.2224	NaN	NaN	NaN	NaN	-0.786	-0.7351	NaN	NaN	NaN	NaN	NaN	NaN	NaN	NaN	NaN	NaN	-1.7323	-0.6974	-0.1589	0.5633	1.4834	2.3077	2.7577	NaN	NaN	0.5127	0.1105	-0.2915	-0.4334	-0.3858	-0.2692	-0.3246	-0.5362
74	-1.209	-0.9304	-1.614	-1.216	-1.2724	-1.3162	-1.3901	-1.4542	-1.4373	-1.3168	-1.0948	-1.2547	-1.135	-0.2794	-0.4491	-0.3333	-0.4883	-0.4889	-0.6238	-0.8185	-0.8681	-0.7262	-0.6061	-0.4419	0.1823	NaN	NaN	NaN	NaN	NaN	NaN	NaN	-0.2325	-0.1644	0.0412	0.8298	2.0013	3.1455	3.9637	4.2426	4.0312	3.4416	2.5461	1.6338	1.0925	0.9773	0.2604	NaN	-1.3369
70	NaN	NaN	NaN	NaN	NaN	NaN	NaN	-1.4311	-1.4699	-1.4462	NaN	-1.0735	NaN	NaN	NaN	NaN	NaN	NaN	NaN	NaN	NaN	NaN	NaN	-0.2264	0.5213	NaN	NaN	NaN	NaN	NaN	NaN	0.4336	0.5443	0.5059	1.4792	3.4812	5.1603	5.9772	6.4811	6.6996	NaN	NaN	4.6467	3.6992	2.6148	2.4123	NaN	NaN	-1.5248
66	NaN	NaN	NaN	NaN	NaN	NaN	NaN	NaN	NaN	NaN	NaN	NaN	NaN	NaN	NaN	NaN	NaN	NaN	NaN	-0.4568	NaN	NaN	NaN	NaN	1.5064	NaN	NaN	NaN	NaN	5.2638	4.965	NaN	NaN	2.6672	2.8709	4.6959	6.9208	7.9748	NaN	NaN	NaN	NaN	NaN	NaN	NaN	NaN	NaN	NaN	NaN
62	NaN	NaN	NaN	NaN	NaN	NaN	NaN	NaN	NaN	NaN	NaN	NaN	NaN	NaN	NaN	NaN	NaN	NaN	-0.1654	-0.218	NaN	-0.4402	-1.0245	0.5292	2.844	4.1516	NaN	NaN	6.0191	7.0345	7.7828	8.4561	8.7729	8.0531	7.768	7.6363	8.5257	NaN	NaN	NaN	NaN	NaN	NaN	NaN	NaN	NaN	NaN	NaN	NaN
58	3.3132	4.2329	NaN	NaN	NaN	NaN	5.4294	5.6033	6.4504	NaN	NaN	NaN	NaN	NaN	NaN	NaN	NaN	NaN	-0.2196	-0.4866	NaN	NaN	NaN	NaN	2.2486	3.621	4.055	4.6174	6.0413	8.4832	9.2006	9.569	9.8921	10.1436	10.6193	NaN	8.2912	8.201	NaN	NaN	NaN	NaN	NaN	NaN	NaN	NaN	NaN	NaN	NaN
54	3.5691	4.0413	4.7722	5.2769	4.7644	4.3273	4.2009	4.984	6.272	7.2167	NaN	NaN	NaN	NaN	NaN	NaN	NaN	NaN	NaN	NaN	NaN	NaN	NaN	NaN	NaN	2.2839	4.5424	5.4302	5.7972	7.4193	9.2456	10.5983	11.1021	10.8371	NaN	NaN	NaN	NaN	NaN	NaN	NaN	NaN	NaN	NaN	NaN	NaN	NaN	NaN	NaN
50	4.0885	3.8422	3.91	4.0954	4.1883	4.311	4.5548	5.2746	6.194	6.9369	7.4495	NaN	NaN	NaN	NaN	NaN	NaN	NaN	NaN	NaN	NaN	NaN	NaN	NaN	NaN	-0.1209	3.6698	8.6978	10.5551	10.7277	11.592	12.0268	12.009	11.5593	NaN	NaN	NaN	NaN	NaN	NaN	NaN	NaN	NaN	NaN	NaN	NaN	NaN	NaN	NaN
46	5.963	5.5121	5.5435	5.9524	6.3513	6.4802	6.5108	6.855	7.2862	7.4791	7.7529	NaN	NaN	NaN	NaN	NaN	NaN	NaN	NaN	NaN	NaN	NaN	NaN	NaN	2.0176	NaN	3.2566	12.1213	14.5667	13.8474	13.6024	13.1196	12.6747	12.3489	12.3011	12.1271	NaN	NaN	NaN	NaN	NaN	NaN	NaN	NaN	NaN	NaN	NaN	NaN	NaN
42	9.6834	9.3514	9.1301	9.137	9.0167	8.9027	8.97	9.2085	9.5169	9.197	8.6163	NaN	NaN	NaN	NaN	NaN	NaN	NaN	NaN	NaN	NaN	NaN	8.9928	11.8466	13.4114	11.7107	12.8562	17.3325	16.2115	15.2103	14.3741	13.705	13.2374	12.9925	NaN	NaN	13.3391	13.514	13.916	14.2944	NaN	NaN	NaN	NaN	NaN	NaN	NaN	NaN	NaN
38	12.8604	12.4192	11.9027	11.5679	11.1663	11.0141	11.1841	11.5947	11.9083	11.1828	9.8341	8.9043	NaN	NaN	NaN	NaN	NaN	NaN	NaN	NaN	NaN	15.4801	18.2655	20.0265	20.5304	19.9543	18.9907	18.1549	16.807	15.8798	15.1991	14.8943	14.5447	14.434	NaN	NaN	13.7535	14.1409	14.2973	14.8918	NaN	NaN	NaN	NaN	NaN	NaN	NaN	NaN	NaN
34	14.9249	14.4979	13.8825	13.5405	13.4282	13.6494	14.1481	14.7322	14.7537	13.6926	11.7293	9.8392	NaN	NaN	NaN	NaN	NaN	NaN	NaN	NaN	20.7261	20.4028	20.6531	20.3204	19.7233	19.2202	18.8431	18.3126	17.6567	17.0478	16.8937	16.864	16.4067	15.9139	15.6543	NaN	NaN	NaN	16.0565	15.7382	16.0323	16.3596	16.4947	NaN	NaN	NaN	NaN	NaN	NaN
30	16.6594	16.625	16.3442	16.2799	16.8927	17.1119	17.5087	17.6596	17.304	16.5823	14.9482	12.6365	11.0405	NaN	NaN	NaN	NaN	NaN	18.0868	NaN	22.0984	20.5712	19.8927	19.659	19.5429	19.3794	19.2363	19.0693	18.9282	18.7639	18.5538	18.2188	17.5807	16.432	NaN	NaN	NaN	NaN	NaN	NaN	NaN	NaN	NaN	NaN	NaN	NaN	NaN	NaN	NaN
26	19.4058	19.5276	19.239	19.4431	20.0268	19.9079	19.7659	19.4742	19.0715	18.4506	17.3465	15.1562	12.2321	NaN	NaN	NaN	NaN	19.5064	20.329	19.7013	23.5943	21.6697	21.068	20.9254	21.043	21.1036	20.8954	20.5625	20.2659	19.967	19.4391	18.922	17.9402	NaN	NaN	NaN	NaN	NaN	NaN	NaN	NaN	NaN	NaN	NaN	NaN	NaN	NaN	20.2079	NaN
22	21.8971	21.662	21.3957	21.6152	21.6542	21.4687	20.9779	20.3816	20.0394	19.3118	18.1635	16.2792	13.7552	13.3559	13.8664	NaN	20.555	19.9689	NaN	25.1718	24.6664	23.321	23.0592	22.9386	22.8214	22.8126	22.4443	21.8973	21.5737	21.0649	19.6959	18.498	16.105	NaN	NaN	NaN	NaN	NaN	NaN	NaN	NaN	NaN	NaN	23.4183	NaN	NaN	NaN	NaN	20.2036
18	23.9336	23.6081	23.3442	23.0672	22.3196	21.4646	20.3778	19.9917	19.1042	18.0663	17.4188	15.6539	14.346	13.6539	13.8025	13.7557	NaN	NaN	NaN	24.6779	25.0896	25.095	23.9589	23.9509	23.7007	23.3581	22.8019	22.0055	21.2272	20.1238	18.0872	16.1948	14.4343	NaN	NaN	NaN	NaN	NaN	NaN	NaN	NaN	NaN	NaN	NaN	NaN	NaN	NaN	18.6795	20.3861
14	23.3823	22.4127	21.3132	19.8284	18.7836	17.7758	16.3303	15.9191	14.6237	13.8479	13.7476	13.2118	13.6475	13.4227	13.4028	13.6361	13.5668	13.4936	NaN	NaN	23.4911	23.151	22.7307	22.6428	22.7948	21.8036	20.8848	19.237	17.9116	16.5733	14.7404	13.928	14.151	NaN	NaN	NaN	NaN	NaN	NaN	NaN	NaN	NaN	NaN	NaN	NaN	16.4352	18.1234	19.6087	20.2507
10	19.3585	17.9491	15.7876	15.1367	14.169	13.4405	12.9879	14.0437	12.8967	12.7047	12.455	12.8041	12.8144	12.7678	12.7251	12.6934	12.7681	12.9431	13.9386	19.0358	20.4472	NaN	NaN	NaN	20.4334	19.6256	16.9937	14.0407	13.724	13.8183	13.372	13.5435	14.7741	NaN	NaN	NaN	NaN	NaN	NaN	NaN	NaN	NaN	NaN	NaN	NaN	NaN	19.4736	20.3525	19.4538
6	22.8723	22.2081	21.3834	22.5152	21.8264	20.6493	21.0856	21.7059	20.6745	19.3745	17.5489	17.2756	15.3772	14.2986	13.945	13.2112	13.2894	13.5562	14.0364	14.5173	14.7159	NaN	NaN	NaN	NaN	22.2719	20.8503	17.824	16.1868	16.3264	15.1688	14.6027	14.9341	15.2403	NaN	NaN	15.5515	NaN	NaN	NaN	NaN	NaN	NaN	NaN	NaN	NaN	19.2655	17.695	17.2258
2	27.0402	25.9531	25.0102	25.7304	24.8925	24.5751	24.1572	23.4986	21.1629	20.5714	18.3603	16.5609	15.1766	14.7843	14.7374	14.1693	14.2989	14.625	14.5135	14.3606	NaN	NaN	NaN	NaN	NaN	NaN	22.7512	23.2402	19.7968	17.3884	15.633	15.3786	15.1141	14.7788	14.7638	15.001	15.199	15.7384	NaN	NaN	NaN	NaN	NaN	NaN	NaN	18.0264	17.4185	17.2564	17.3022
-2	27.4579	26.4272	26.2239	26.0644	25.3869	25.2403	23.9655	22.8787	21.1065	20.6755	18.2271	15.2596	14.3289	13.9841	14.1982	13.7268	13.9296	14.2789	14.3715	14.2486	NaN	NaN	NaN	NaN	NaN	NaN	NaN	23.5038	21.0692	17.0478	15.4863	14.7672	14.6136	14.2151	14.166	14.3581	14.813	15.817	NaN	NaN	NaN	NaN	NaN	NaN	18.6178	16.8739	16.643	17.069	17.0948
-6	27.558	27.0866	27.0592	27.0372	27.0332	26.6263	25.8879	25.1505	24.5087	23.9448	21.35	19.5191	18.3123	16.4837	16.3737	14.6409	13.8365	13.7682	13.9307	14.1002	NaN	NaN	NaN	NaN	NaN	NaN	NaN	NaN	NaN	22.0266	20.2047	17.8297	16.1783	15.194	14.1533	13.7972	14.1553	15.0567	NaN	NaN	NaN	NaN	NaN	NaN	17.449	15.3496	15.3198	15.274	15.022
-10	25.9366	26.2481	26.1582	26.1025	26.116	25.9162	25.6269	25.4018	25.0981	24.6063	23.7589	22.974	21.9424	20.5392	19.9197	17.7397	16.0924	14.772	13.6374	13.679	NaN	NaN	NaN	NaN	NaN	NaN	NaN	NaN	NaN	23.8583	22.6374	21.4016	19.4762	17.6186	15.241	13.9948	13.3985	13.9797	15.0142	NaN	NaN	NaN	NaN	NaN	20.6074	18.7458	17.5792	17.8014	17.0971
-14	25.1733	25.5871	25.5865	25.488	25.2616	25.3656	25.2131	25.2254	25.083	24.7471	24.3458	23.7568	22.9661	22.1267	21.461	20.7985	20.0022	18.7085	16.3135	14.6449	13.088	NaN	NaN	NaN	NaN	NaN	NaN	NaN	23.4489	23.9729	22.9822	22.515	21.4261	19.5781	17.2535	15.2392	13.6651	13.2346	14.7239	NaN	NaN	NaN	NaN	NaN	22.9311	22.9296	21.7764	22.034	21.6021
-18	23.7351	23.9431	24.2678	24.2027	24.2711	24.4662	24.3761	24.3214	24.3107	24.1903	23.7117	23.7306	23.1968	22.3334	21.6607	21.4725	20.6135	19.7917	18.6364	16.6102	13.6235	12.5114	NaN	NaN	NaN	NaN	NaN	NaN	21.779	23.4184	23.0092	22.3471	21.5205	20.5447	19.0144	17.4593	15.552	13.9514	NaN	NaN	NaN	NaN	NaN	19.8221	21.159	NaN	22.6176	22.7101	22.5293
-22	21.7359	21.7112	21.6253	21.7004	22.4998	22.4403	22.3414	22.5376	22.2629	21.9646	21.5854	22.1607	21.9501	21.7801	21.7056	21.1367	20.0602	19.0613	18.3384	16.6873	13.9721	12.4316	NaN	NaN	NaN	NaN	NaN	NaN	21.3675	21.8252	21.5522	20.9883	20.3519	20.0855	19.0695	17.9922	16.8814	15.1323	13.0583	NaN	NaN	NaN	NaN	19.6493	20.6284	NaN	21.8865	21.5452	21.4002
-26	19.4617	19.2232	19.0124	19.5953	19.7845	19.2395	19.3638	19.7302	19.3787	19.5498	19.8654	19.8737	20.2888	20.6963	20.5319	19.5916	18.9424	18.1164	17.3871	16.0395	13.6835	11.8388	NaN	NaN	NaN	NaN	NaN	19.886	19.8781	19.7631	19.2642	18.7011	18.8071	18.5404	18.046	17.3302	16.7782	15.8114	13.5276	NaN	NaN	NaN	NaN	18.5291	19.9206	20.2961	19.4759	19.1202	18.8578
-30	16.8223	16.5529	16.9268	17.0952	17.8679	16.8748	16.9181	17.0602	17.4118	17.8209	17.674	17.8015	18.0821	18.4428	18.2573	17.3771	17.2232	16.5264	15.9875	14.9006	12.8428	11.1556	NaN	NaN	NaN	NaN	18.1789	18.5136	17.9056	18.5878	18.3144	16.7913	16.7162	16.9835	16.6367	16.0816	16.1154	15.8328	14.4111	NaN	NaN	NaN	18.9498	18.1737	18.5002	17.6079	17.1691	16.9137	16.1988
-34	14.9711	14.3107	14.6021	14.6863	14.9923	14.7204	14.7672	14.8737	15.0028	15.0841	14.9197	15.1966	15.5173	15.1775	15.1679	14.2655	13.9036	14.0383	13.9902	13.1438	11.7897	10.8898	NaN	NaN	NaN	15.221	17.2673	16.202	15.7748	15.7725	15.8654	14.9967	15.1763	15.4541	14.9181	14.6023	15.241	15.1319	14.9982	12.7972	NaN	17.0539	18.5098	17.1844	16.7673	16.2866	16.211	15.8043	14.7478
-38	13.9095	12.937	12.3193	11.9286	11.7317	11.7973	11.8353	12.15	12.3689	12.382	11.8614	11.6298	11.5562	11.8176	11.2744	10.7125	10.6827	11.2535	11.5647	11.4938	10.9146	NaN	NaN	NaN	NaN	12.8221	14.9477	13.6973	14.3077	14.2522	13.7043	13.167	13.2147	13.3659	12.8044	11.9002	11.5693	11.3874	13.4764	14.968	15.2959	15.6837	17.3278	16.0573	14.9578	14.1393	15.1062	15.577	14.0727
-42	12.1777	12.0458	11.1723	10.1886	9.7644	9.6999	9.7041	10.1713	9.9324	9.6317	9.0651	9.1013	9.1027	9.5403	9.0557	8.7022	8.5049	8.4507	9.0327	10.1808	9.7861	NaN	NaN	NaN	4.2377	9.9027	10.6815	9.209	9.8044	10.4574	10.488	10.4592	9.9096	10.7962	10.0854	9.3414	8.6033	8.6652	10.4967	11.9715	12.2324	11.3382	10.757	9.8708	8.8835	8.1754	8.7271	11.9239	12.3945
-46	8.9427	9.9845	10.1659	9.8087	9.0817	8.614	8.7513	9.6047	8.5028	7.759	7.3392	7.3947	7.3931	7.5355	7.4165	7.2741	7.1861	6.7352	7.8602	9.2332	8.5703	NaN	NaN	5.541	4.5348	7.3861	7.9292	6.8693	6.764	6.3453	5.5314	5.5952	5.4939	5.5001	5.1652	5.8005	5.7776	5.9805	6.0318	5.6229	5.8024	6.1243	6.4224	4.9833	4.1573	3.7015	3.3271	5.192	5.7106
-50	7.6143	8.2178	8.2922	8.4212	8.2939	7.7667	7.6899	7.6731	6.6621	6.8576	7.1474	6.8913	6.2745	6.5715	7.0571	6.7148	6.4474	6.0793	6.5953	6.2258	7.4912	NaN	NaN	5.5637	4.8342	4.5563	4.0848	2.7543	2.2775	2.055	2.1147	2.4351	2.607	2.0432	1.5723	1.9716	2.0493	1.8903	1.731	1.612	1.6739	1.9413	2.2463	2.1675	1.7895	2.2588	2.6123	2.1667	2.2996
-54	6.3554	6.5901	6.1124	5.6369	5.2189	4.3002	3.9353	4.2639	4.0689	4.344	5.2729	5.2246	5.5185	6.4644	6.3526	5.7755	5.4325	5.3967	5.34	5.1892	5.9629	7.3461	NaN	5.1389	4.4643	3.232	1.5949	0.4862	0.1766	-0.0815	0.0522	0.4177	0.5422	0.2918	0.0302	0.3207	0.0991	-0.2573	-0.7393	-0.7162	-0.5461	-0.2465	0.1346	0.2092	0.0208	0.3516	0.7495	0.3197	0.7959
-58	3.9503	3.7125	3.2161	2.8927	1.8221	0.3642	-0.1314	0.5019	1.118	1.4607	2.2353	2.6137	2.7116	2.5738	2.8052	3.8382	4.0567	3.8498	4.4736	4.5618	4.3528	4.2635	3.0055	1.657	1.1301	0.5779	0.1194	-0.1874	-0.3225	-0.6136	-0.8936	-0.796	-0.631	-0.7856	-0.7251	0.1461	0.2201	-0.475	-1.0939	-1.6274	-1.3514	-0.9168	-1.013	-1.2527	-1.1498	-0.8037	-0.6287	-1.0476	-1.0791
-62	1.129	0.8435	0.293	0.2542	-0.1255	-0.8582	-1.3007	-1.0865	-0.6233	-0.2819	0.2738	0.9093	0.9231	0.4965	0.6644	1.2864	1.446	1.2711	1.4149	1.5346	1.2421	0.6261	-0.2828	-0.6373	-0.6756	-0.8433	-0.9412	-1.0662	-1.1504	-1.1743	-1.2017	-1.0364	-0.8934	-0.8491	-0.2028	0.2534	-0.1434	-0.5294	-0.6411	-0.247	-0.652	-0.6631	-0.8403	-0.659	-0.4988	-0.6149	-0.5033	-0.2634	-0.2651
-66	-0.0355	0.0952	-0.1882	-0.8003	-0.978	-0.9946	-1.2174	-1.4616	-1.5574	-1.3966	-1.0898	-0.813	-1.1556	-1.1961	-1.1271	-1.1057	-1.2215	-1.2799	-1.0181	-0.8354	-0.6903	-0.6369	-0.7555	NaN	-1.3432	-1.4739	-1.3572	-1.2946	-1.324	-1.1852	-0.8631	-0.6136	-0.4819	-0.2579	0.18	0.0292	-0.4445	-0.8033	-0.4482	0.5422	0.7123	0.3243	-0.3797	-0.4904	-0.6869	-1.2689	-1.2693	-0.7151	-0.57
-70	-0.1716	-0.1155	-0.4401	-1.1118	-1.1665	-1.0445	-1.0527	-1.074	-0.9247	-0.6735	-0.6322	-0.9315	-1.0728	-0.8203	-0.3781	-0.224	-1.0374	-0.8108	-0.5486	-0.5484	-0.8505	NaN	NaN	NaN	-1.7618	-1.636	-1.3233	-1.1261	-0.9319	-0.8376	-0.8228	-0.8742	-0.8182	-0.626	0.171	0.199	-0.5185	-1.6083	-1.637	-0.8311	-0.4108	-0.641	NaN	NaN	NaN	NaN	NaN	NaN	NaN
-74	-0.6463	-0.7585	-1.0621	-1.4031	-1.4353	-1.3595	-1.321	-1.1652	-1.0244	-0.8599	NaN	NaN	0.6085	1.4531	3.4756	4.7764	NaN	NaN	NaN	NaN	NaN	NaN	NaN	NaN	-1.6055	-1.5926	-1.5481	-1.4669	-1.4589	-1.5597	-1.7243	-1.8255	NaN	NaN	NaN	NaN	NaN	NaN	NaN	NaN	NaN	NaN	NaN	NaN	NaN	NaN	NaN	NaN	NaN
-78	-1.3981	-1.4942	-1.6839	-1.8844	NaN	NaN	NaN	NaN	NaN	NaN	NaN	NaN	NaN	NaN	NaN	NaN	NaN	NaN	NaN	NaN	NaN	NaN	NaN	NaN	NaN	NaN	NaN	-1.6521	-1.7023	NaN	NaN	NaN	NaN	NaN	NaN	NaN	NaN	NaN	NaN	NaN	NaN	NaN	NaN	NaN	NaN	NaN	NaN	NaN	NaN
-82	NaN	NaN	NaN	NaN	NaN	NaN	NaN	NaN	NaN	NaN	NaN	NaN	NaN	NaN	NaN	NaN	NaN	NaN	NaN	NaN	NaN	NaN	NaN	NaN	NaN	NaN	NaN	NaN	NaN	NaN	NaN	NaN	NaN	NaN	NaN	NaN	NaN	NaN	NaN	NaN	NaN	NaN	NaN	NaN	NaN	NaN	NaN	NaN	NaN
-86	NaN	NaN	NaN	NaN	NaN	NaN	NaN	NaN	NaN	NaN	NaN	NaN	NaN	NaN	NaN	NaN	NaN	NaN	NaN	NaN	NaN	NaN	NaN	NaN	NaN	NaN	NaN	NaN	NaN	NaN	NaN	NaN	NaN	NaN	NaN	NaN	NaN	NaN	NaN	NaN	NaN	NaN	NaN	NaN	NaN	NaN	NaN	NaN	NaN
[truncated: 23 more columns]

## Sheet: 150.0m
	-177.5	-172.5	-167.5	-162.5	-157.5	-152.5	-147.5	-142.5	-137.5	-132.5	-127.5	-122.5	-117.5	-112.5	-107.5	-102.5	-97.5	-92.5	-87.5	-82.5	-77.5	-72.5	-67.5	-62.5	-57.5	-52.5	-47.5	-42.5	-37.5	-32.5	-27.5	-22.5	-17.5	-12.5	-7.5	-2.5	2.5	7.5	12.5	17.5	22.5	27.5	32.5	37.5	42.5	47.5	52.5	57.5	62.5
86	-1.1501	-1.2075	-1.2434	-1.2835	-1.3206	-1.3291	-1.3597	-1.3698	-1.3772	-1.3879	-1.4	-1.4039	-1.4068	-1.4098	-1.4051	-1.3916	-1.3671	-1.3317	-1.3164	-1.3629	-1.324	-1.2784	-1.2299	-1.1729	-1.1032	-1.0561	-1.0497	-1.0474	-1.0472	-1.0735	-1.1113	-1.1362	-1.0836	-1.0619	-1.0127	-0.9357	-0.8419	-0.7581	-0.7077	-0.6057	-0.5143	-0.4158	-0.2481	0.023	0.2602	0.4551	0.744	0.8489	0.7596
82	-1.0066	-1.0299	-1.0307	-1.0343	-1.033	-1.0279	-1.0069	-0.9814	-0.9716	-1.006	-1.0946	-1.2119	-1.2988	-1.3339	-1.2601	-1.2164	-0.7583	-0.6648	-0.5762	NaN	NaN	NaN	NaN	NaN	NaN	NaN	NaN	NaN	NaN	NaN	NaN	NaN	-0.4931	0.1859	0.0831	0.4744	0.8059	1.0482	1.3255	1.2059	0.9337	0.836	0.117	-0.0756	-0.0757	0.0002	0.2754	0.9785	0.7391
78	-1.3835	-1.3867	-1.3895	-1.3805	-1.3763	-1.3491	-1.3008	-1.2398	-1.1598	-1.0983	-1.2121	-1.5871	-1.8159	NaN	-1.8749	-1.8182	NaN	NaN	NaN	NaN	-0.7263	-0.6355	NaN	NaN	NaN	NaN	NaN	NaN	NaN	NaN	NaN	NaN	-1.2996	-0.2705	0.223	0.828	1.6044	2.3304	2.6043	NaN	NaN	0.54	0.1444	-0.3144	-0.4866	-0.446	-0.3792	-0.3486	-0.218
74	-1.4764	-1.5271	NaN	-1.1663	-1.2875	-1.352	-1.4205	-1.4686	-1.4281	-1.2713	-1.044	-1.2407	-1.0674	-0.9482	-1.5245	-0.9617	-0.921	NaN	-0.5441	-0.6935	-0.7103	-0.5766	-0.4059	-0.2032	0.4733	NaN	NaN	NaN	NaN	NaN	NaN	NaN	-0.3911	-0.2126	0.0669	0.8731	2.0146	3.1246	3.9776	4.3018	4.071	3.3753	2.3727	1.3782	0.8184	0.6839	0.1597	NaN	-1.2494
70	NaN	NaN	NaN	NaN	NaN	NaN	NaN	-1.4641	-1.482	-1.378	NaN	-0.8065	NaN	NaN	NaN	NaN	NaN	NaN	NaN	NaN	NaN	NaN	NaN	0.1209	1.0584	NaN	NaN	NaN	NaN	NaN	NaN	0.5475	0.5101	0.4383	1.4098	3.3857	5.0916	5.9246	6.4409	6.7222	NaN	NaN	4.4662	3.4988	NaN	NaN	NaN	NaN	NaN
66	NaN	NaN	NaN	NaN	NaN	NaN	NaN	NaN	NaN	NaN	NaN	NaN	NaN	NaN	NaN	NaN	NaN	NaN	NaN	NaN	NaN	NaN	NaN	NaN	1.7576	NaN	NaN	NaN	NaN	5.7333	5.1107	NaN	NaN	2.3176	2.5735	4.3594	6.7309	7.9591	NaN	NaN	NaN	NaN	NaN	NaN	NaN	NaN	NaN	NaN	NaN
62	NaN	NaN	NaN	NaN	NaN	NaN	NaN	NaN	NaN	NaN	NaN	NaN	NaN	NaN	NaN	NaN	NaN	NaN	-0.1748	-0.1126	NaN	-0.2299	-0.8998	0.6962	2.8359	4.2786	NaN	NaN	6.4088	7.3383	7.6685	8.3746	8.7286	7.9658	7.5258	7.4154	8.4296	NaN	NaN	NaN	NaN	NaN	NaN	NaN	NaN	NaN	NaN	NaN	NaN
58	3.3089	4.2214	NaN	NaN	NaN	NaN	5.3477	5.5909	6.2964	NaN	NaN	NaN	NaN	NaN	NaN	NaN	NaN	NaN	NaN	0.1241	NaN	NaN	NaN	NaN	2.1971	3.5657	4.2	4.6144	5.8945	8.5478	9.0199	9.4321	9.8371	10.0197	10.3658	NaN	NaN	7.8094	NaN	NaN	NaN	NaN	NaN	NaN	NaN	NaN	NaN	NaN	NaN
54	3.5336	3.9045	4.5616	5.0745	4.6869	4.2848	4.1579	4.9705	6.1606	6.9395	NaN	NaN	NaN	NaN	NaN	NaN	NaN	NaN	NaN	NaN	NaN	NaN	NaN	NaN	NaN	2.3321	4.4845	5.2448	5.3779	6.9748	8.9607	10.5073	11.0326	10.7712	NaN	NaN	NaN	NaN	NaN	NaN	NaN	NaN	NaN	NaN	NaN	NaN	NaN	NaN	NaN
50	4.1487	3.7728	3.8169	4.0223	4.1896	4.2677	4.5149	5.201	6.0729	6.7125	7.1809	NaN	NaN	NaN	NaN	NaN	NaN	NaN	NaN	NaN	NaN	NaN	NaN	NaN	NaN	0.1885	3.6794	8.4383	10.163	10.3606	11.3397	11.7804	11.8293	11.4096	NaN	NaN	NaN	NaN	NaN	NaN	NaN	NaN	NaN	NaN	NaN	NaN	NaN	NaN	NaN
46	6.0274	5.4628	5.4566	5.9899	6.336	6.3908	6.463	6.7029	7.1353	7.3338	7.558	NaN	NaN	NaN	NaN	NaN	NaN	NaN	NaN	NaN	NaN	NaN	NaN	NaN	2.831	NaN	2.711	12.0043	14.3745	13.5567	13.3111	12.7868	12.3888	12.0784	12.0385	NaN	NaN	NaN	NaN	NaN	NaN	NaN	NaN	NaN	NaN	NaN	NaN	NaN	NaN
42	9.2902	9.0642	8.7612	8.8587	8.8203	8.7646	8.8062	8.8327	9.0296	8.7791	8.2686	NaN	NaN	NaN	NaN	NaN	NaN	NaN	NaN	NaN	NaN	NaN	8.0014	11.5808	12.97	11.4382	12.622	16.9482	15.8649	14.7756	13.9567	13.3203	12.8494	12.7076	NaN	NaN	13.2611	13.4088	13.932	14.2236	NaN	NaN	NaN	NaN	NaN	NaN	NaN	NaN	NaN
38	12.2811	11.9618	11.5679	11.2246	10.8533	10.6744	10.6989	10.7751	10.9064	10.2701	9.193	8.6948	NaN	NaN	NaN	NaN	NaN	NaN	NaN	NaN	NaN	14.5928	17.4432	19.0698	19.6966	19.3925	18.4288	17.6775	16.4476	15.4032	14.6816	14.4418	14.0984	14.043	NaN	NaN	13.5071	13.8687	14.2086	14.7243	NaN	NaN	NaN	NaN	NaN	NaN	NaN	NaN	NaN
34	14.2644	13.9085	13.4764	13.0581	12.8182	12.8505	13.1476	13.5078	13.5753	12.5807	10.7702	9.3412	NaN	NaN	NaN	NaN	NaN	NaN	NaN	NaN	NaN	19.6172	19.8902	19.5977	19.186	18.7882	18.3681	17.9089	17.2865	16.6275	16.4192	16.4125	15.9323	15.4426	15.2295	NaN	NaN	NaN	NaN	15.4483	15.7524	16.0271	16.1893	NaN	NaN	NaN	NaN	NaN	NaN
30	15.972	15.865	15.6286	15.4947	15.8323	16.0018	16.3739	16.5544	16.3758	15.6295	13.6976	11.3901	10.3888	NaN	NaN	NaN	NaN	NaN	17.0429	NaN	20.9811	19.8904	19.3218	19.119	18.9645	18.7694	18.6491	18.5669	18.4462	18.3045	18.0391	17.7038	17.0321	15.9743	NaN	NaN	NaN	NaN	NaN	NaN	NaN	NaN	NaN	NaN	NaN	NaN	NaN	NaN	NaN
26	18.3583	18.3695	18.1628	18.3626	18.8255	18.9053	18.8072	18.5692	18.2369	17.5524	15.9871	13.4548	11.2505	NaN	NaN	NaN	NaN	18.3281	19.3184	NaN	22.4815	20.8229	20.2243	20.1091	20.142	20.1391	20.0264	19.7325	19.5385	19.2356	18.7619	18.2785	17.2745	NaN	NaN	NaN	NaN	NaN	NaN	NaN	NaN	NaN	NaN	NaN	NaN	NaN	NaN	19.6754	NaN
22	20.5161	20.3345	20.0617	20.2375	20.3757	20.4207	19.9929	19.4167	19.205	18.3085	16.3664	14.1691	12.4422	12.6293	13.0784	NaN	19.0758	18.6115	NaN	23.9214	23.5014	22.3361	22.0497	21.889	21.7362	21.761	21.435	20.9602	20.7693	20.1784	18.9617	17.7824	15.5051	NaN	NaN	NaN	NaN	NaN	NaN	NaN	NaN	NaN	NaN	22.8613	NaN	NaN	NaN	NaN	19.2254
18	22.5494	22.165	21.7617	21.3875	20.7228	19.8943	18.8037	18.3053	17.4489	16.1833	15.0316	13.6109	13.0933	12.8277	12.986	13.1367	NaN	NaN	NaN	23.2	23.9062	23.8184	22.7729	22.7574	22.4841	22.186	21.5777	20.7118	19.9171	18.8744	17.0526	15.3536	13.7659	NaN	NaN	NaN	NaN	NaN	NaN	NaN	NaN	NaN	NaN	NaN	NaN	NaN	NaN	17.6422	19.0271
14	21.2192	20.0793	19.0331	17.548	16.7275	15.3491	14.1221	13.7102	13.1934	12.6355	12.5409	12.3838	12.8717	12.6536	12.7045	12.9501	12.9966	13.1126	NaN	NaN	22.0138	21.6528	21.2341	21.0932	21.0404	20.0491	19.1525	17.5457	16.3955	15.6335	13.9294	13.3182	13.6525	NaN	NaN	NaN	NaN	NaN	NaN	NaN	NaN	NaN	NaN	NaN	NaN	15.7012	16.9193	18.2203	18.6516
10	16.1798	15.0593	13.6391	12.9869	12.4689	11.9269	11.769	12.2952	12.0553	11.9128	11.8451	12.1238	12.1854	12.1882	12.198	12.2857	12.4128	12.6364	13.5855	17.9528	19.2443	NaN	NaN	NaN	18.0755	17.2306	14.7499	12.4414	12.3455	12.7283	12.5805	13.0135	14.3198	NaN	NaN	NaN	NaN	NaN	NaN	NaN	NaN	NaN	NaN	NaN	NaN	NaN	17.8044	18.3925	17.4829
6	19.7891	19.0128	18.2309	19.7677	18.7938	17.2072	17.541	18.0924	17.1227	15.4798	13.9814	13.8377	13.06	12.9331	12.9478	12.5595	12.7712	13.1447	13.6157	14.0758	14.2038	NaN	NaN	NaN	NaN	19.0239	17.6502	14.8426	13.2887	13.5567	13.6713	13.7656	14.4219	14.8024	NaN	NaN	15.0814	NaN	NaN	NaN	NaN	NaN	NaN	NaN	NaN	NaN	17.2584	15.7343	15.5164
2	24.1456	22.5468	21.4615	22.6633	21.5751	20.9257	20.1529	19.5732	17.9669	16.5779	15.0787	14.1352	13.7221	13.8984	13.9996	13.5957	13.7358	14.1862	14.1649	14.0552	NaN	NaN	NaN	NaN	NaN	NaN	20.6012	19.1987	15.4501	14.3678	14.1331	14.0896	14.2634	14.231	14.3172	14.5511	14.8168	15.2285	NaN	NaN	NaN	NaN	NaN	NaN	NaN	15.7194	15.6511	15.4282	15.729
-2	24.9439	23.2712	23.4813	23.2969	22.4164	22.0972	19.878	19.1627	18.2975	17.0008	15.1687	13.7786	13.3876	13.497	13.6021	13.3028	13.5113	13.9711	14.0781	13.9517	NaN	NaN	NaN	NaN	NaN	NaN	NaN	19.4254	17.2498	14.1252	13.6633	13.764	13.5928	13.6033	13.7682	14.0295	14.4918	15.2986	NaN	NaN	NaN	NaN	NaN	NaN	16.3225	15.1252	15.1475	15.542	15.7515
-6	25.9984	25.1753	25.3596	25.2679	25.1811	24.4748	23.1563	22.4216	21.7789	20.4844	17.7237	16.8385	15.789	14.5822	14.4822	13.3626	13.1753	13.2726	13.5838	13.8093	NaN	NaN	NaN	NaN	NaN	NaN	NaN	NaN	NaN	18.1162	16.4047	15.1819	13.9168	13.6105	13.1	13.1503	13.7266	14.6531	NaN	NaN	NaN	NaN	NaN	NaN	15.709	14.2204	14.2294	14.1892	14.0649
-10	24.4309	24.684	24.6434	24.6165	24.6335	24.2241	24.1891	23.9077	23.4758	22.8931	21.8717	21.0411	19.952	18.4714	17.6565	15.5211	14.5924	13.6456	12.9962	13.2462	NaN	NaN	NaN	NaN	NaN	NaN	NaN	NaN	NaN	21.5314	19.6052	18.5625	16.7878	15.2537	13.3699	12.827	12.7995	13.5637	14.563	NaN	NaN	NaN	NaN	NaN	19.0408	17.508	16.0743	16.1201	15.4514
-14	24.0263	24.4431	24.443	24.3405	24.1572	24.2368	24.1158	24.1767	23.9896	23.7894	23.3593	22.8332	22.119	21.3683	20.545	19.6584	18.7247	17.3955	14.5138	13.447	12.7154	NaN	NaN	NaN	NaN	NaN	NaN	NaN	21.8757	23.0656	21.6456	20.9489	19.2566	17.052	14.945	13.6862	12.813	12.6893	14.2988	NaN	NaN	NaN	NaN	NaN	21.5008	21.433	20.0798	20.4646	19.9804
-18	22.9783	23.1796	23.5059	23.4633	23.4387	23.712	23.6175	23.6964	23.471	23.4452	23.1009	22.979	22.3841	21.968	21.4608	21.0819	20.2196	19.3139	17.3093	14.9661	12.7638	12.3564	NaN	NaN	NaN	NaN	NaN	NaN	20.167	22.7374	22.4856	21.3438	19.8742	18.8436	16.9183	15.5314	14.2719	13.2455	NaN	NaN	NaN	NaN	NaN	18.5366	19.6838	NaN	21.6655	21.8841	21.6935
-22	21.1288	21.1203	20.9903	21.0726	21.8235	21.8672	21.7254	21.9048	21.5477	21.4305	21.1922	21.4973	21.5073	21.5612	21.5362	21.1009	20.089	18.9986	17.9432	15.3714	12.6227	12.0718	NaN	NaN	NaN	NaN	NaN	NaN	20.3172	20.7892	21.1219	20.2711	19.2824	19.1323	18.0247	16.6142	15.6317	14.2412	12.5919	NaN	NaN	NaN	NaN	18.4635	19.1691	NaN	21.1768	20.9262	20.7563
-26	18.9388	18.8535	18.5476	19.0411	19.157	18.589	18.5406	18.793	18.7444	19.0128	19.3043	19.1162	19.7489	20.3764	20.075	19.4866	18.7861	17.8578	16.6928	14.9483	12.3884	11.4045	NaN	NaN	NaN	NaN	NaN	18.8996	18.847	18.6562	18.7446	17.7212	18.1939	17.7249	17.251	16.5622	15.9503	15.1145	12.899	NaN	NaN	NaN	NaN	18.0121	18.9276	19.4221	18.6436	18.3704	18.1194
-30	16.3808	16.2573	16.5109	16.5681	17.1752	16.1868	16.2059	16.3809	16.926	17.3391	17.222	17.1942	17.3404	17.9644	17.4689	17.0235	17.0916	16.1441	15.7284	14.2493	11.8369	11.0036	NaN	NaN	NaN	NaN	17.5776	17.8157	17.2425	17.6471	17.6735	16.1768	16.2587	16.156	16.1948	15.9194	15.7376	15.3602	13.7015	NaN	NaN	NaN	18.1565	17.9682	17.8559	17.0706	16.6237	16.3789	15.5862
-34	14.5666	13.7889	14.1316	14.1839	14.4415	14.3342	14.4704	14.664	14.6482	14.6031	14.4636	14.5956	14.3125	14.6343	14.6123	13.8921	13.8792	13.5383	13.5933	12.4246	11.0656	10.8284	NaN	NaN	NaN	NaN	16.7506	15.8733	15.5666	15.49	15.4246	14.6184	14.8291	14.947	14.6945	14.3022	15.0686	14.9156	14.3535	12.0227	NaN	16.5217	18.0349	17.0797	16.507	15.9606	15.9047	15.5295	14.4863
-38	13.5571	12.5272	11.9242	11.4217	11.126	11.1503	11.2885	11.7471	11.8411	11.7281	11.3402	11.202	10.8288	11.3326	10.7993	9.8214	10.0353	10.6712	10.9917	10.8391	10.416	NaN	NaN	NaN	NaN	12.8198	14.3099	13.2944	14.0203	13.9801	13.6441	13.0568	12.9987	13.1872	12.3765	11.4356	11.344	11.289	12.9563	14.3343	14.8164	15.1089	16.2655	15.7976	14.931	14.2635	15.0484	15.556	14.0125
-42	11.893	11.792	10.9	9.9143	9.3965	9.2661	9.2237	9.761	9.4449	9.2849	8.7476	8.5513	8.537	8.9242	8.5676	8.1168	7.9998	8.0555	8.577	9.4819	9.4068	NaN	NaN	NaN	3.8969	9.3625	9.8918	8.7478	9.3681	10.0098	10.1769	10.226	9.666	10.675	9.7623	9.0007	8.3199	8.0869	10.4252	11.6335	11.7379	10.9587	10.4403	9.5287	8.7299	8.1116	8.5052	11.8364	12.2154
-46	8.705	9.6333	9.9028	9.6459	8.9782	8.506	8.4998	9.404	8.2487	7.6306	7.2272	7.227	7.0189	7.0868	7.1287	7.0563	6.9581	6.5703	8.1881	8.6495	8.2386	NaN	NaN	NaN	4.3665	6.8307	7.3402	6.4207	6.406	5.9401	5.1043	5.2532	5.1683	5.1894	4.8844	5.6221	5.4822	5.1614	5.7638	5.389	5.525	5.8842	6.2364	4.4989	3.9019	3.5036	3.0909	5.0292	5.4057
-50	7.3589	7.7899	8.0163	8.2582	8.0593	7.5276	7.5663	7.6305	6.2499	6.567	7.0857	6.8307	6.1475	6.4042	6.9365	6.7123	6.4167	6.0221	6.6666	6.0349	7.2348	NaN	NaN	NaN	4.8686	4.2955	3.7817	2.5418	2.1334	1.9112	1.9058	2.137	2.3122	1.8061	1.2477	1.8341	1.9709	1.6873	1.5948	1.5247	1.5502	1.8252	2.1145	2.0222	1.6681	2.0819	2.3983	1.9966	2.0661
-54	6.301	6.3259	5.9776	5.5198	4.9387	4.0041	3.7766	4.0683	3.7264	4.0453	5.1029	4.9747	5.2848	6.0883	6.3676	5.8445	5.4344	5.3232	5.2636	5.0933	5.8542	7.22	NaN	5.0144	4.3572	3.1159	1.5538	0.5702	0.3346	0.162	0.1804	0.3362	0.4337	0.3605	0.0677	0.4541	0.5706	0.1854	-0.5025	-0.5638	-0.4338	-0.2518	0.018	0.1625	-0.0303	0.2449	0.6366	0.326	0.6883
-58	4.1634	4.1352	3.4472	2.7248	1.7048	0.3248	-0.1367	0.5933	1.1861	1.4576	2.1969	2.4678	2.5451	2.4488	2.5503	3.1525	3.5422	3.5634	4.22	4.2534	4.1541	4.1112	2.9535	1.8475	1.356	0.7446	0.2943	0.0408	-0.0645	-0.2657	-0.5346	-0.5719	-0.4503	-0.4184	-0.2025	0.6311	0.9183	0.2635	-0.6201	-1.1677	-1.0771	-0.7799	-0.7961	-0.7101	-0.7064	-0.5315	-0.1573	-0.3726	-0.6095
-62	1.3237	1.273	0.7553	0.374	0.0551	-0.5306	-0.9593	-0.6839	-0.2157	-0.0345	0.3412	0.9382	0.995	0.561	0.6611	1.1602	1.235	1.0916	1.2087	1.3814	1.2939	0.8649	0.1313	-0.1669	-0.4492	-0.7793	-0.8451	-0.8101	-0.7836	-0.6954	-0.637	-0.5864	-0.4272	-0.1624	0.5013	0.8062	0.3715	-0.0131	0.1843	0.5535	-0.0787	-0.2112	-0.3388	0.1125	0.2458	-0.0515	0.1377	0.4545	0.4544
-66	0.4984	0.6318	0.5096	-0.0983	-0.4114	-0.4089	-0.6718	-0.9688	-1.0308	-0.9053	-0.6911	-0.3497	-0.6322	-0.8903	-0.985	-1.0076	-1.0556	-1.0275	-0.6209	-0.1562	0.1091	0.0858	-0.3028	NaN	-1.5222	-1.304	-0.9907	-0.8909	-0.9241	-0.6995	-0.3296	-0.1211	0.08	0.5204	0.8039	0.4402	-0.1458	-0.4825	-0.0249	1.0344	1.2282	0.7488	0.0785	-0.0881	-0.5447	-1.2232	-1.136	-0.5352	-0.3027
-70	0.4736	0.5048	0.1949	-0.4484	-0.4913	-0.3701	-0.4732	-0.59	-0.4097	-0.1277	-0.0727	-0.404	-0.7045	-0.6387	-0.2523	0.0042	-0.4611	-0.2578	0.0232	0.1551	-0.0931	NaN	NaN	NaN	-1.6945	-1.4471	-1.126	-0.9239	-0.7623	-0.5507	-0.4836	-0.5801	-0.7571	-0.9335	-0.3963	-0.1608	-0.4441	-1.2596	-1.5419	-0.9559	-0.5019	-0.6732	NaN	NaN	NaN	NaN	NaN	NaN	NaN
-74	-0.3794	-0.4291	-0.7344	-1.1042	-1.1436	-1.0335	-1.017	-0.9785	-0.9638	-0.9213	NaN	NaN	-0.3695	0.5305	2.2277	3.8821	NaN	NaN	NaN	NaN	NaN	NaN	NaN	NaN	-1.6148	-1.5642	-1.5316	-1.4445	-1.434	-1.5302	-1.699	-1.8516	NaN	NaN	NaN	NaN	NaN	NaN	NaN	NaN	NaN	NaN	NaN	NaN	NaN	NaN	NaN	NaN	NaN
-78	-1.387	-1.4369	-1.656	-1.9048	NaN	NaN	NaN	NaN	NaN	NaN	NaN	NaN	NaN	NaN	NaN	NaN	NaN	NaN	NaN	NaN	NaN	NaN	NaN	NaN	NaN	NaN	NaN	-1.6513	-1.6859	NaN	NaN	NaN	NaN	NaN	NaN	NaN	NaN	NaN	NaN	NaN	NaN	NaN	NaN	NaN	NaN	NaN	NaN	NaN	NaN
-82	NaN	NaN	NaN	NaN	NaN	NaN	NaN	NaN	NaN	NaN	NaN	NaN	NaN	NaN	NaN	NaN	NaN	NaN	NaN	NaN	NaN	NaN	NaN	NaN	NaN	NaN	NaN	NaN	NaN	NaN	NaN	NaN	NaN	NaN	NaN	NaN	NaN	NaN	NaN	NaN	NaN	NaN	NaN	NaN	NaN	NaN	NaN	NaN	NaN
-86	NaN	NaN	NaN	NaN	NaN	NaN	NaN	NaN	NaN	NaN	NaN	NaN	NaN	NaN	NaN	NaN	NaN	NaN	NaN	NaN	NaN	NaN	NaN	NaN	NaN	NaN	NaN	NaN	NaN	NaN	NaN	NaN	NaN	NaN	NaN	NaN	NaN	NaN	NaN	NaN	NaN	NaN	NaN	NaN	NaN	NaN	NaN	NaN	NaN
[truncated: 23 more columns]

## Sheet: 200.0 m
	-177.5	-172.5	-167.5	-162.5	-157.5	-152.5	-147.5	-142.5	-137.5	-132.5	-127.5	-122.5	-117.5	-112.5	-107.5	-102.5	-97.5	-92.5	-87.5	-82.5	-77.5	-72.5	-67.5	-62.5	-57.5	-52.5	-47.5	-42.5	-37.5	-32.5	-27.5	-22.5	-17.5	-12.5	-7.5	-2.5	2.5	7.5	12.5	17.5	22.5	27.5	32.5	37.5	42.5	47.5	52.5	57.5	62.5
86	-0.6761	-0.7751	-0.8572	-0.9195	-0.9664	-0.9929	-1.0014	-0.9907	-0.9704	-0.9475	-0.9246	-0.9053	-0.8943	-0.8842	-0.8665	-0.8387	-0.7987	-0.739	-0.7068	-0.7373	-0.6807	-0.6154	-0.5454	-0.4661	-0.3908	-0.3304	-0.3036	-0.3027	-0.3248	-0.3596	-0.3981	-0.397	-0.3352	-0.3149	-0.2657	-0.1863	-0.0869	0.0063	0.0837	0.2052	0.3203	0.439	0.6105	0.7835	0.984	1.0904	1.2319	1.3337	1.3197
82	-1.0065	-1.0647	-1.1184	-1.1871	-1.2498	-1.2917	-1.2818	-1.2009	-1.0598	-0.9015	-0.767	-0.6903	-0.6636	-0.677	-0.655	-0.484	-0.1202	0.0264	0.137	NaN	NaN	NaN	NaN	NaN	NaN	NaN	NaN	NaN	NaN	NaN	NaN	NaN	0.3919	0.8534	0.7415	1.0331	1.2933	1.5268	1.85	1.889	1.9868	1.9456	1.7848	1.2932	1.2284	1.3407	1.5234	1.41	1.0775
78	-1.2853	-1.254	-1.2773	-1.3504	-1.4396	-1.5261	-1.5517	-1.4753	-1.2837	-1.0442	-0.8685	-0.9211	-1.0488	NaN	-1.2562	NaN	NaN	NaN	NaN	NaN	NaN	NaN	NaN	NaN	NaN	NaN	NaN	NaN	NaN	NaN	NaN	NaN	NaN	0.5585	0.8066	1.1261	1.6598	2.311	NaN	NaN	NaN	NaN	NaN	NaN	-0.3963	-0.4089	-0.1918	NaN	0.2162
74	NaN	-1.1829	NaN	-1.3786	-1.1758	-1.2661	-1.3041	-1.292	-1.1439	-0.8968	-0.6866	NaN	NaN	NaN	-0.4297	-0.1044	NaN	NaN	NaN	-0.4098	-0.4365	-0.2295	-0.0092	0.1904	NaN	NaN	NaN	NaN	NaN	NaN	NaN	NaN	0.3792	0.2361	0.2119	0.7599	1.7641	2.8603	3.8149	4.2741	4.3774	3.2431	2.4843	1.1077	0.2985	NaN	NaN	NaN	NaN
70	NaN	NaN	NaN	NaN	NaN	NaN	NaN	-0.6053	-0.5375	NaN	NaN	NaN	NaN	NaN	NaN	NaN	NaN	NaN	NaN	NaN	NaN	NaN	NaN	0.8392	2.1113	NaN	NaN	NaN	NaN	NaN	NaN	1.0589	0.6113	0.4643	1.2303	2.91	4.5305	5.515	6.1765	6.4574	NaN	NaN	NaN	NaN	NaN	NaN	NaN	NaN	NaN
66	NaN	NaN	NaN	NaN	NaN	NaN	NaN	NaN	NaN	NaN	NaN	NaN	NaN	NaN	NaN	NaN	NaN	NaN	NaN	NaN	NaN	NaN	NaN	NaN	2.0843	NaN	NaN	NaN	NaN	5.7035	4.975	NaN	NaN	1.6177	1.9627	3.5909	6.1221	7.6684	NaN	NaN	NaN	NaN	NaN	NaN	NaN	NaN	NaN	NaN	NaN
62	NaN	NaN	NaN	NaN	NaN	NaN	NaN	NaN	NaN	NaN	NaN	NaN	NaN	NaN	NaN	NaN	NaN	NaN	NaN	NaN	NaN	NaN	-0.4257	1.3475	3.2931	4.8851	NaN	NaN	6.2495	7.0862	7.5374	8.3047	8.6092	7.7548	7.0876	6.8066	8.472	NaN	NaN	NaN	NaN	NaN	NaN	NaN	NaN	NaN	NaN	NaN	NaN
58	3.3945	3.9443	NaN	NaN	NaN	NaN	4.9263	5.1451	5.9399	NaN	NaN	NaN	NaN	NaN	NaN	NaN	NaN	NaN	NaN	NaN	NaN	NaN	NaN	NaN	2.6785	3.7999	4.294	4.517	5.571	7.6996	8.3999	9.2296	9.7293	9.8857	10.1309	NaN	NaN	NaN	NaN	NaN	NaN	NaN	NaN	NaN	NaN	NaN	NaN	NaN	NaN
54	3.6515	3.9015	4.4775	4.9834	4.5496	4.1666	3.9716	4.5775	5.6205	6.3797	NaN	NaN	NaN	NaN	NaN	NaN	NaN	NaN	NaN	NaN	NaN	NaN	NaN	NaN	NaN	2.5374	4.2013	4.7428	5.0199	6.3853	8.3309	10.0337	10.7436	10.6878	NaN	NaN	NaN	NaN	NaN	NaN	NaN	NaN	NaN	NaN	NaN	NaN	NaN	NaN	NaN
50	4.1206	3.8169	3.8151	4.0258	4.0947	4.179	4.3735	4.9244	5.7291	6.3386	6.8305	NaN	NaN	NaN	NaN	NaN	NaN	NaN	NaN	NaN	NaN	NaN	NaN	NaN	NaN	1.1111	3.7182	7.7968	9.4107	9.6234	10.7251	11.3363	11.5184	11.1939	NaN	NaN	NaN	NaN	NaN	NaN	NaN	NaN	NaN	NaN	NaN	NaN	NaN	NaN	NaN
46	5.6709	5.2926	5.4424	5.9277	6.201	6.2911	6.3274	6.5539	6.9825	7.0198	7.12	NaN	NaN	NaN	NaN	NaN	NaN	NaN	NaN	NaN	NaN	NaN	NaN	NaN	4.705	NaN	3.1448	11.4606	13.6696	12.9688	12.8362	12.439	12.0925	11.78	11.6893	NaN	NaN	NaN	NaN	NaN	NaN	NaN	NaN	NaN	NaN	NaN	NaN	NaN	NaN
42	8.5751	8.5428	8.4058	8.5712	8.6325	8.6292	8.6197	8.5461	8.528	8.0994	7.6334	NaN	NaN	NaN	NaN	NaN	NaN	NaN	NaN	NaN	NaN	NaN	NaN	10.8887	12.2831	10.8654	12.1129	16.2579	15.2565	14.1945	13.4802	12.8982	12.458	12.3208	NaN	NaN	13.1202	13.3519	NaN	13.9233	NaN	NaN	NaN	NaN	NaN	NaN	NaN	NaN	NaN
38	11.4385	11.1889	10.8331	10.635	10.4204	10.2739	10.0946	9.8195	9.5319	8.9202	8.3312	8.1922	NaN	NaN	NaN	NaN	NaN	NaN	NaN	NaN	NaN	13.0005	15.9474	17.5737	18.53	18.4392	17.5982	16.9487	15.707	14.6797	14.0338	13.8071	13.4875	13.4425	NaN	NaN	13.2727	13.5809	14.1529	14.6089	NaN	NaN	NaN	NaN	NaN	NaN	NaN	NaN	NaN
34	13.4036	13.0888	12.6787	12.2583	11.972	11.7861	11.6357	11.4752	11.1004	10.2181	9.2659	8.5795	NaN	NaN	NaN	NaN	NaN	NaN	NaN	NaN	NaN	18.4679	18.9879	18.766	18.5278	18.2057	17.814	17.324	16.5979	15.8979	15.6865	15.6765	15.1677	14.6777	14.4692	NaN	NaN	NaN	NaN	15.0668	15.3766	15.5534	15.7494	NaN	NaN	NaN	NaN	NaN	NaN
30	14.9317	14.691	14.3445	14.0941	14.1693	13.98	13.8869	13.8782	13.5349	12.4272	10.8458	9.5393	9.4648	NaN	NaN	NaN	NaN	NaN	15.2052	NaN	19.1202	19.0873	18.7022	18.5692	18.4722	18.2414	18.0542	17.9426	17.7974	17.5467	17.3026	16.9756	16.2156	15.2047	NaN	NaN	NaN	NaN	NaN	NaN	NaN	NaN	NaN	NaN	NaN	NaN	NaN	NaN	NaN
26	16.6528	16.4849	16.2654	16.2978	16.5933	16.6635	16.4812	16.3313	15.8781	14.406	12.3267	10.6299	10.197	NaN	NaN	NaN	NaN	16.2456	17.1513	NaN	20.4972	19.5602	19.1341	18.9831	18.9107	18.8209	18.6127	18.3857	18.3051	18.0154	17.6516	17.3137	16.2822	NaN	NaN	NaN	NaN	NaN	NaN	NaN	NaN	NaN	NaN	NaN	NaN	NaN	NaN	18.9886	NaN
22	18.0427	17.7272	17.5566	17.7144	17.875	18.1108	17.5504	17.0884	16.5471	14.6663	12.4733	11.2085	11.1432	11.7865	12.1446	NaN	16.3468	16.231	NaN	21.1618	21.0396	20.3738	20.1476	19.8853	19.7042	19.6995	19.3968	18.9978	18.8288	18.3795	17.4469	16.5	14.5154	NaN	NaN	NaN	NaN	NaN	NaN	NaN	NaN	NaN	NaN	22.021	NaN	NaN	NaN	NaN	17.879
18	19.3706	18.9251	18.6019	18.145	17.2065	16.3148	15.0428	14.5163	13.76	12.7462	11.9533	11.6697	11.9244	11.9428	12.1182	12.3141	NaN	NaN	NaN	20.2894	21.3241	21.2126	20.3933	20.0939	19.8151	19.6101	19.028	18.1879	17.5064	16.8018	15.2321	14.0729	12.8763	NaN	NaN	NaN	NaN	NaN	NaN	NaN	NaN	NaN	NaN	NaN	NaN	NaN	NaN	16.4168	17.1421
14	16.6957	15.5406	14.8393	13.6821	12.7719	11.8405	11.507	11.4537	11.4152	11.3679	11.4237	11.5266	11.9387	11.8162	11.9055	12.1087	12.2776	12.4455	NaN	NaN	19.2641	18.9376	18.5069	18.0438	17.6892	16.8326	16.0938	15.1215	14.2389	13.8092	12.6701	12.4034	12.8958	NaN	NaN	NaN	NaN	NaN	NaN	NaN	NaN	NaN	NaN	NaN	NaN	14.8645	15.224	16.0154	16.3516
10	12.0289	11.4824	11.1486	10.9701	10.8124	10.7519	10.8398	11.2095	11.0361	11.0444	11.152	11.3892	11.4327	11.5001	11.4974	11.5671	11.7952	12.0606	12.7348	16.0112	17.0144	NaN	NaN	NaN	14.4213	13.7529	11.9889	11.0059	11.0763	11.3853	11.61	12.2763	13.479	NaN	NaN	NaN	NaN	NaN	NaN	NaN	NaN	NaN	NaN	NaN	NaN	NaN	15.3753	15.4612	14.8503
6	13.2799	12.8793	12.4789	13.199	12.4889	11.8583	12.1179	12.3122	11.9656	11.7649	11.7477	11.7139	11.6215	11.8694	11.9535	11.7682	12.0842	12.5143	12.9464	13.3872	13.6174	NaN	NaN	NaN	NaN	14.3391	12.4006	11.1253	11.2917	11.7203	12.3137	12.8978	13.5117	13.9768	NaN	NaN	14.0733	NaN	NaN	NaN	NaN	NaN	NaN	NaN	NaN	NaN	14.4104	13.6396	13.512
2	15.6902	14.6069	13.8681	14.3328	13.626	13.4142	13.4728	13.3232	13.2019	13.108	12.9032	12.5953	12.714	12.9806	13.1937	12.9998	13.1344	13.5157	13.4923	13.4494	NaN	NaN	NaN	NaN	NaN	NaN	14.6723	13.8609	12.6435	12.6533	13.0121	13.2103	13.3066	13.5526	13.7082	13.9553	14.1613	14.1887	NaN	NaN	NaN	NaN	NaN	NaN	NaN	13.4732	13.4322	13.5586	13.6594
-2	17.5047	15.8515	15.8454	15.4917	14.7647	14.4579	13.6824	13.3691	13.3562	13.2554	13.0267	12.7868	12.6588	12.9987	13.013	12.8755	13.081	13.433	13.4324	13.3504	NaN	NaN	NaN	NaN	NaN	NaN	NaN	15.0565	13.5156	12.2862	12.4847	12.8793	12.6721	12.91	13.1775	13.5304	13.8747	14.3141	NaN	NaN	NaN	NaN	NaN	NaN	13.7696	13.3575	13.4419	13.7371	13.8288
-6	20.7903	19.324	19.5203	19.2546	18.9512	18.23	17.1757	16.2938	15.6687	14.9212	13.859	13.3147	12.5366	12.5852	12.9382	12.4865	12.5346	12.7083	13.0174	13.293	NaN	NaN	NaN	NaN	NaN	NaN	NaN	NaN	NaN	13.2186	12.3249	12.303	11.7404	11.7891	11.8655	12.2534	12.9243	13.8632	NaN	NaN	NaN	NaN	NaN	NaN	13.413	12.6824	12.7515	12.8307	12.7601
-10	20.948	21.087	21.2371	21.5399	21.6273	21.1452	20.799	20.6299	20.0464	19.2099	17.8671	16.6182	15.142	14.0593	13.821	12.7264	12.4701	12.2902	12.3027	12.6069	NaN	NaN	NaN	NaN	NaN	NaN	NaN	NaN	NaN	16.0483	14.5177	14.1211	12.9145	12.0509	11.5001	11.4231	11.8091	12.7295	13.6029	NaN	NaN	NaN	NaN	NaN	16.3194	15.1357	13.9016	13.9491	13.0859
-14	21.5592	22.0613	22.0496	22.0455	21.926	21.9424	21.8528	21.9564	21.882	21.6959	21.0024	20.3666	19.5682	18.6744	17.4999	16.1634	14.8698	13.7574	12.4554	12.2135	12.1923	NaN	NaN	NaN	NaN	NaN	NaN	NaN	18.3751	18.4104	17.3451	16.6188	15.1392	13.4829	12.4443	11.9229	11.6542	11.7921	13.348	NaN	NaN	NaN	NaN	NaN	18.4884	18.44	17.1899	17.4808	17.2939
-18	21.2527	21.5005	21.7663	21.6693	21.7069	21.8304	21.6695	21.7514	21.7903	21.4615	21.2299	21.1385	20.6413	20.5867	19.9243	19.135	17.6821	15.9678	13.8644	12.39	11.9079	11.8673	NaN	NaN	NaN	NaN	NaN	NaN	17.354	19.0162	18.9445	17.6709	16.4017	15.2593	13.9605	13.2697	12.6763	12.1457	NaN	NaN	NaN	NaN	NaN	16.2736	17.0332	NaN	19.5459	19.7085	19.5999
-22	19.8696	19.8041	19.9076	20.0247	20.4351	20.3767	20.2387	20.3277	19.8956	19.8057	20.2078	20.4802	20.5786	20.4675	20.2192	19.6419	18.8894	17.3125	15.0327	12.5631	11.4212	11.4764	NaN	NaN	NaN	NaN	NaN	NaN	17.9913	18.1849	18.562	17.373	16.6099	16.2221	15.2395	14.4909	13.8448	12.8139	11.7927	NaN	NaN	NaN	NaN	16.3514	16.8276	NaN	19.4933	19.3768	19.2565
-26	18.0423	17.7706	17.5095	17.9783	17.9562	17.4061	17.8103	17.9049	17.2959	17.7983	18.4579	18.3779	18.7313	19.0804	18.6538	18.6912	17.3983	16.271	14.3404	12.3139	11.1473	10.8295	NaN	NaN	NaN	NaN	NaN	16.9226	17.0937	16.6217	17.2409	16.6988	16.3202	15.9386	15.3909	14.8444	14.3541	13.6068	11.7904	NaN	NaN	NaN	NaN	15.861	17.0827	17.7878	17.179	17.0061	16.7854
-30	15.5497	15.574	15.4019	15.4074	15.7407	14.944	15.4387	15.5184	15.6929	16.1637	16.1566	15.9438	15.8202	16.6008	16.2192	16.3472	15.7754	14.7557	14.0044	12.319	10.7327	10.5252	NaN	NaN	NaN	NaN	16.3265	16.5704	16.0152	15.8783	16.3592	15.6075	15.4116	15.2483	15.1734	14.8382	14.6168	14.2902	12.6302	NaN	NaN	NaN	16.813	16.5841	16.828	16.2666	15.6692	15.3602	14.6201
-34	13.8992	13.0736	12.9341	13.142	13.2935	13.1706	13.2233	13.4665	13.6107	13.4675	13.254	13.5673	12.9725	12.8676	13.2664	12.7052	12.6211	12.0673	11.9627	11.0923	10.4053	10.3585	NaN	NaN	NaN	NaN	15.8955	15.134	15.082	14.9694	14.6779	14.2041	14.334	14.3372	14.142	13.7209	14.4067	14.2122	13.4746	11.1223	NaN	15.8989	17.5393	16.676	16.0449	15.5537	15.4471	15.0645	14.0632
-38	12.979	11.8269	10.8178	10.5233	10.1766	10.0631	9.9748	10.4923	10.6903	10.5432	10.2189	10.2481	9.6055	9.9022	9.5512	8.7028	8.7218	9.1756	9.4548	9.499	9.6786	NaN	NaN	NaN	NaN	12.0531	13.4667	12.4088	13.0984	13.4606	13.177	12.6091	12.268	12.3874	11.9777	10.748	10.8379	10.8976	12.1596	13.4849	14.269	14.4675	16.4915	15.2791	14.2426	14.0244	14.837	15.4425	13.983
-42	11.3629	11.2506	10.2413	9.3793	8.881	8.7246	8.6603	9.234	8.6794	8.4541	8.142	7.7694	7.7214	8.0187	7.6258	7.0664	6.9838	7.0422	7.3322	7.9181	8.7359	NaN	NaN	NaN	3.62	8.4024	8.5344	7.4704	8.124	8.9533	9.4569	9.6844	8.8223	9.6506	9.5257	8.6742	7.8994	7.7396	9.8151	11.1021	11.135	10.1899	10.0302	9.0008	8.287	7.8735	8.0818	11.7795	12.4255
-46	8.3974	9.2196	9.4716	9.3969	8.8544	8.4135	8.5448	9.2717	8.09	7.3977	7.1277	6.8493	6.6791	6.857	6.8102	6.7259	6.6782	6.1874	6.6856	7.1792	7.7806	NaN	NaN	NaN	4.0652	5.821	6.0887	5.2973	5.6	5.2559	4.5794	4.8582	4.6063	4.7976	4.712	5.2842	5.0613	4.7624	5.5082	5.2718	5.433	5.611	5.8852	4.2692	4.0126	3.4585	2.8264	4.9099	5.6854
-50	7.1278	7.6037	7.749	8.1149	7.9595	7.4079	7.465	7.5071	6.1157	6.4686	7.0153	6.5228	6.1827	6.6216	6.743	6.5701	6.3228	5.8519	6.0445	5.6405	6.7803	NaN	NaN	NaN	4.8528	3.8201	3.2933	2.4418	2.2668	2.0438	1.8747	2.0639	2.1725	1.9258	1.5555	1.8884	1.9766	1.6884	1.6847	1.6069	1.8074	2.2236	2.449	2.1434	1.7369	2.0742	2.2448	1.7787	1.9369
-54	6.115	6.0753	5.7258	5.3041	4.7526	3.7723	3.5624	3.8792	3.5134	3.8234	4.9503	4.9165	5.3612	6.2211	5.9001	5.3295	5.161	5.3409	5.1823	5.0271	5.5464	6.7123	NaN	4.7471	4.1974	3.0058	1.7594	1.0817	0.9517	0.8183	0.7241	0.8644	0.903	0.9351	1.0716	1.2535	1.1876	0.7734	0.3198	0.2806	0.3964	0.5677	0.5262	0.5637	0.517	0.7169	0.9653	0.7051	0.9195
-58	3.9608	3.8346	3.1526	2.5544	1.7284	0.7005	0.5137	1.1226	1.4979	1.4772	2.0501	2.3984	2.5409	2.664	2.7517	3.1805	3.3462	3.4457	4.03	4.0095	3.8289	3.769	3.0494	2.2048	1.7497	1.1541	0.7878	0.5679	0.5475	0.434	0.1452	0.2318	0.4052	0.4374	0.7328	1.1812	1.4379	1.0016	0.1329	0.0323	0.1591	0.0033	-0.1667	0.3567	0.8102	0.655	0.8812	1.0187	0.8394
-62	1.5025	1.4441	1.2931	0.9357	0.59	0.3542	0.3436	0.6028	0.7041	0.4575	0.438	0.9127	1.0866	0.9531	1.0917	1.3623	1.3623	1.3791	1.4876	1.6059	1.5487	1.3119	0.9552	0.5951	-0.1129	-0.5821	-0.5912	-0.3572	-0.1012	0.0452	0.0135	0.0437	0.2587	0.409	0.5949	0.8509	0.8309	0.7761	0.8667	1.1068	0.9612	0.5858	0.3112	1.1248	1.1932	0.7227	0.8133	1.2623	1.3836
-66	1.4222	1.6275	1.8883	1.3535	0.7587	0.8496	0.8622	0.7872	0.6495	0.4564	0.3924	0.6275	0.7221	0.5952	0.4035	0.1235	0.0422	0.4006	0.7393	1.0096	1.1223	1.0053	0.5054	NaN	-1.5883	-1.0759	-0.4234	-0.0617	0.093	0.2878	0.441	0.6516	0.9672	1.1888	1.1003	0.8694	0.6323	0.4741	0.6777	1.2996	1.5375	1.1567	0.2021	-0.027	-0.5379	-1.1427	-0.9885	-0.3467	-0.017
-70	1.4264	1.5074	1.1793	0.4829	0.6276	1.1741	1.4121	1.2591	0.9501	0.8111	0.8391	0.8123	0.7934	1.034	1.2816	1.3031	0.9952	0.8905	0.9406	1.012	0.7773	NaN	NaN	NaN	-1.8313	-0.8467	-0.159	0.0133	0.1221	0.1632	0.0486	-0.1557	-0.3084	-0.4443	0.2902	0.4342	0.1696	-0.6482	-1.2985	-0.9158	-0.4428	-0.6828	NaN	NaN	NaN	NaN	NaN	NaN	NaN
-74	-0.0548	0.0168	-0.1754	-0.3983	-0.4258	-0.2668	-0.1981	-0.1626	-0.295	-0.1937	NaN	NaN	NaN	1.9558	3.9083	4.8499	NaN	NaN	NaN	NaN	NaN	NaN	NaN	NaN	-1.4238	-1.3914	-1.1997	-1.1198	-1.2018	-1.419	-1.7132	-1.9717	NaN	NaN	NaN	NaN	NaN	NaN	NaN	NaN	NaN	NaN	NaN	NaN	NaN	NaN	NaN	NaN	NaN
-78	-1.4218	-1.3348	-1.5295	-1.7047	NaN	NaN	NaN	NaN	NaN	NaN	NaN	NaN	NaN	NaN	NaN	NaN	NaN	NaN	NaN	NaN	NaN	NaN	NaN	NaN	NaN	NaN	NaN	-1.6745	-1.6607	NaN	NaN	NaN	NaN	NaN	NaN	NaN	NaN	NaN	NaN	NaN	NaN	NaN	NaN	NaN	NaN	NaN	NaN	NaN	NaN
-82	NaN	NaN	NaN	NaN	NaN	NaN	NaN	NaN	NaN	NaN	NaN	NaN	NaN	NaN	NaN	NaN	NaN	NaN	NaN	NaN	NaN	NaN	NaN	NaN	NaN	NaN	NaN	NaN	NaN	NaN	NaN	NaN	NaN	NaN	NaN	NaN	NaN	NaN	NaN	NaN	NaN	NaN	NaN	NaN	NaN	NaN	NaN	NaN	NaN
-86	NaN	NaN	NaN	NaN	NaN	NaN	NaN	NaN	NaN	NaN	NaN	NaN	NaN	NaN	NaN	NaN	NaN	NaN	NaN	NaN	NaN	NaN	NaN	NaN	NaN	NaN	NaN	NaN	NaN	NaN	NaN	NaN	NaN	NaN	NaN	NaN	NaN	NaN	NaN	NaN	NaN	NaN	NaN	NaN	NaN	NaN	NaN	NaN	NaN
[truncated: 23 more columns]

[truncated: 23 more sheets: 250.0 m, 300.0 m, 400.0 m, 500.0 m, 600.0 m, 700.0 m, 800.0 m, 900.0 m, 1000.0 m, 1100.0 m, 1200.0 m, 1300.0 m, 1400.0 m, 1500.0 m, 1750.0 m, 2000.0 m, 2500.0 m, 3000.0 m, 3500.0 m, 4000.0 m …]
