# Supplementary material for: Pliocene Model Intercomparison Project (PlioMIP): experimental design and boundary conditions (Experiment 2)
Source: Copernicus journal article supplement (doi:10.5194/gmd-4-571-2011), 2011-07-01
Supplement: Supplementary file 2 [file gmd-4-571-2011-supplement.zip › PlioMIP_exp2_version1/exp2_alternate/topo_v1.4.xls]

## Sheet: topo_1.3_1.1_hybrid_sl_adj
	-179	-177	-175	-173	-171	-169	-167	-165	-163	-161	-159	-157	-155	-153	-151	-149	-147	-145	-143	-141	-139	-137	-135	-133	-131	-129	-127	-125	-123	-121	-119	-117	-115	-113	-111	-109	-107	-105	-103	-101	-99	-97	-95	-93	-91	-89	-87	-85	-83
89	0	0	0	0	0	0	0	0	0	0	0	0	0	0	0	0	0	0	0	0	0	0	0	0	0	0	0	0	0	0	0	0	0	0	0	0	0	0	0	0	0	0	0	0	0	0	0	0	0
87	0	0	0	0	0	0	0	0	0	0	0	0	0	0	0	0	0	0	0	0	0	0	0	0	0	0	0	0	0	0	0	0	0	0	0	0	0	0	0	0	0	0	0	0	0	0	0	0	0
85	0	0	0	0	0	0	0	0	0	0	0	0	0	0	0	0	0	0	0	0	0	0	0	0	0	0	0	0	0	0	0	0	0	0	0	0	0	0	0	0	0	0	0	0	0	0	0	0	0
83	0	0	0	0	0	0	0	0	0	0	0	0	0	0	0	0	0	0	0	0	0	0	0	0	0	0	0	0	0	0	0	0	0	0	0	0	0	0	0	0	0	0	0	0	0	0	0	17.97	32.57
81	0	0	0	0	0	0	0	0	0	0	0	0	0	0	0	0	0	0	0	0	0	0	0	0	0	0	0	0	0	0	0	0	0	0	0	0	0	0	0	0	0	0	4.49	64.1	30.31	44.55	288.56	533.75	984.21
79	0	0	0	0	0	0	0	0	0	0	0	0	0	0	0	0	0	0	0	0	0	0	0	0	0	0	0	0	0	0	0	0	0	0	3.78	0	0	0	0	0	0	0	1.36	462.34	750	711.96	372.98	98.05	420.91
77	0	0	0	0	0	0	0	0	0	0	0	0	0	0	0	0	0	0	0	0	0	0	0	0	0	0	0	0	8.76	25.21	29.94	32.49	6.89	3.47	0.63	13.1	0.63	9.1	7.53	12.79	13.12	0.94	24.26	30.68	225.44	92.65	198.82	305.59	299.2
75	0	0	0	0	0	0	0	0	0	0	0	0	0	0	0	0	0	0	0	0	0	0	0	0	0	0	0	0	26.2	30.9	29.35	25.62	184.67	145.37	105.47	27.88	26.2	3.72	28.13	38.15	47.56	3.13	138.72	53.67	283.81	36.02	40.14	213.99	430.52
73	0	0	0	0	0	0	0	0	0	0	0	0	0	0	0	0	0	0	0	0	0	0	0	0	0	0	0	3.7	135.58	318.83	119.48	109.38	72.52	26.47	46.61	19.91	28.42	25.76	1.5	30.54	35.99	25.84	189.9	112.87	96.74	93.89	590.7	111.91	178.56
71	0	0	0	0	0	0	0	0	0.62	10.48	35.27	63.31	68.1	48.66	12.99	17.2	0	0	0	0	0	0	0	0	0	0	2.79	1.98	158.07	229.27	50.81	62.85	114.22	138.36	223.14	157.24	55.22	44.6	11.07	5.22	34.65	34.6	146.19	64.61	4	386.95	186.2	190.05	213.43
69	36.41	0.31	0	0	0	0	0	29.22	55.84	243.45	228.45	160.67	301.07	332.78	274.4	279.21	240.85	229.28	211.69	150.58	90.76	41.84	28.69	29.75	33.01	106.44	174.62	106.87	89.75	153.87	67.31	156.51	50	124.25	158.03	148.42	59.52	44.46	44.48	9.47	8.07	27.74	105.03	51.85	33.05	100.04	0	195.89	171.78
67	350	316.61	119.13	52.26	38.42	0	0.57	34.38	109.56	190.34	266.77	335.4	350	350	350	350	350	350	350	350	333.04	281.71	140.5	59.13	50	89.12	249.34	330.4	350	350	342.58	296.47	281.85	277.38	274.72	241.53	291.28	334.16	229.81	82.69	38.7	49.04	73.26	198.24	235.76	263.73	86.59	241.57	223.85
65	100.83	138.91	293.65	194.54	77.02	0	152.72	120.53	50	51.89	112.77	113.03	204.97	264.22	272.47	319.6	350	350	350	350	488.11	727.05	665.77	628.73	697.89	617.79	80.74	68.39	137.68	267	322.88	350	350	350	350	350	350	350	350	350	203.97	125.41	142.53	167.21	190.57	173.43	116.14	100.08	51.02
63	0	0	0	28.84	0	0	0	12.99	34.31	67.87	83.13	109.11	140.02	177.16	415.19	500.24	594.17	606.38	531.22	350	359.93	493.98	544.39	671.42	750	750	629.84	262.7	130.87	50	68.84	165.16	287.88	350	350	350	350	350	350	350	326.34	157.28	139.29	100.77	80.4	51.59	50	90.08	59.22
61	0	0	0	0	0	0	0	28.74	49.43	105.44	140.95	137.88	215.22	592.9	661.59	654.69	739.8	842.24	659.54	652.86	653.36	608.39	495.61	484.21	750	750	750	750	742.52	475.96	267.77	334.42	350	350	350	350	350	350	350	350	350	185.43	78.29	50	50	50	50	50	50
59	0	0	0	0	0	0	0	55.89	27.05	87.43	118.45	56.41	271.6	619.2	270.58	126.43	0	30.17	165.49	165.49	391.78	528.93	638.77	719.66	750	750	750	750	750	730.62	381.2	350	350	350	350	350	350	350	350	350	350	290.46	77	50	50	50	50	50	50
57	0	0	0	0	0	0	0	0	0	1.82	25.45	43.24	63.6	0	0	0	0	0	0	0	0	25.93	49.02	352.01	717.39	750	750	750	750	750	577.9	354.85	350	350	350	350	350	350	350	350	350	350	144.39	59.02	50	50	50	50	50
55	0	0	0	0	0	0	0	0	9.71	15.13	30.51	0	0	0	0	0	0	0	0	0	0	0	0	13.06	363.7	528.52	750	750	587.56	1014.49	1514.36	737.79	563.53	513.7	358.97	350	350	350	350	350	350	237.12	150	143.55	122.45	77.95	51.69	50	50
53	0	0	0	0	0	0	0	0	0	0	0	0	0	0	0	0	0	0	0	0	0	0	0	0	0.87	590.28	681.09	750	663.26	731.42	1949.47	1953.43	1015.86	750	581.57	431.82	350	350	350	350	350	337.07	306.96	275.31	258.81	250.51	178.54	77.76	50
51	0	0	0	0	0	0	0	0	0	0	0	0	0	0	0	0	0	0	0	0	0	0	0	0	0	40.11	587.19	704.6	816.55	801.23	906.44	1818.48	2338.51	1307.19	750	750	654.63	462.7	350	350	350	350	350	350	350	350	345.35	194.99	72.15
49	0	0	0	0	0	0	0	0	0	0	0	0	0	0	0	0	0	0	0	0	0	0	0	0	0	0	209.61	671.62	1178.32	1596.47	879.18	663.09	1118.92	2063.34	1895.92	823.75	750	750	532.92	350	350	350	350	350	350	350	350	340.97	281.72
47	0	0	0	0	0	0	0	0	0	0	0	0	0	0	0	0	0	0	0	0	0	0	0	0	0	0	0	4.08	480.77	339.53	602.77	540.13	750	1236.6	2450	1728.13	750	750	719.46	350	350	350	350	350	350	350	350	350	350
45	0	0	0	0	0	0	0	0	0	0	0	0	0	0	0	0	0	0	0	0	0	0	0	0	0	0	0	0	473.72	236.85	1055.25	750	759.5	1997.25	3005.8	2403.99	1170.25	750	750	458.2	350	350	350	350	350	350	350	350	350
43	0	0	0	0	0	0	0	0	0	0	0	0	0	0	0	0	0	0	0	0	0	0	0	0	0	0	0	12.45	233	563.27	1012.73	811.13	820.22	1909.44	2450	2450	2385.48	1348.87	778.41	617.83	350	350	350	350	350	350	350	350	350
41	0	0	0	0	0	0	0	0	0	0	0	0	0	0	0	0	0	0	0	0	0	0	0	0	0	0	0	0	638.35	499.46	1538.61	1366.03	1947.02	2450	2450	2450	2778.14	2613.04	1034.71	736.97	374.4	350	350	350	350	317	189.19	340.7	350
39	0	0	0	0	0	0	0	0	0	0	0	0	0	0	0	0	0	0	0	0	0	0	0	0	0	0	0	0	337.69	277.58	866.17	1556.53	1925.74	2450	2450	2450	2783.69	3031.5	1126.12	750	442.31	350	350	350	350	285.67	150	225.9	350
37	0	0	0	0	0	0	0	0	0	0	0	0	0	0	0	0	0	0	0	0	0	0	0	0	0	0	0	0	25.87	274.96	538.3	1260.33	1291.31	2016.77	2450	2450	2444.53	2496.82	1477.44	750	458.97	350	256.49	212.21	211.03	97.73	139.9	329.18	352.39
35	0	0	0	0	0	0	0	0	0	0	0	0	0	0	0	0	0	0	0	0	0	0	0	0	0	0	0	0	0	224.51	460.66	548.62	615.26	789.86	2007.38	2440.55	2248.54	1819.77	775.73	750	510.55	348.97	315.59	232.98	120.2	51.63	138.47	311.02	403.45
33	0	0	0	0	0	0	0	0	0	0	0	0	0	0	0	0	0	0	0	0	0	0	0	0	0	0	0	0	0	0	64.27	180.34	196.27	396.58	728.52	919.5	861.1	750	750	614.48	406.48	203.67	114.9	72.89	50.67	50	82.95	130.58	111.87
31	0	0	0	0	0	0	0	0	0	0	0	0	0	0	0	0	0	0	0	0	0	0	0	0	0	0	0	0	0	0	0	98.62	714.67	146.17	543.01	750	1220.56	881.8	750	589.75	350	167.26	52.45	49.39	47.59	50	49.56	50	50
29	0	0	0	0	0	0	0	0	0	0	0	0	0	0	0	0	0	0	0	0	0	0	0	0	0	0	0	0	0	0	0	0	434.44	268.94	249.86	627.53	991.56	2008.75	815.89	607.86	325.02	113.35	27.8	6.75	14.41	4.64	0	4.4	25.68
27	0	0	0	0	0	0	0	0	0	0	0	0	0	0	0	0	0	0	0	0	0	0	0	0	0	0	0	0	0	0	0	0	10.61	170.54	29.63	300.72	694.58	1364.33	2018.4	559.2	250	33.02	0	0	0	0	0	0	8.55
25	0	0	0	0	0	0	0	0	0	0	0	0	0	0	0	0	0	0	0	0	0	0	0	0	0	0	0	0	0	0	0	0	0	4.42	75.42	32.42	423.38	728.59	1804.45	1448.22	387.26	23.92	0	0	0	0	0	0	0
23	0	0	0	0	0	0	0	0	0	0	0	0	0	0	0	0	0	0	0	0	0	0	0	0	0	0	0	0	0	0	0	0	0	0	12.29	14.77	38.26	528	1057.34	2098.77	516.95	31.99	0	0	0	0	0	0.55	12.95
21	0	0	0	0	0	0	0	0	0	0	0	0	0	0	0	0	0	0	0	0	0	0	0	0	0	0	0	0	0	0	0	0	0	0	0	0	0	189.87	652.76	2253.57	1275.56	102.44	0	0	3.27	32.49	18.07	0	0
19	0	0	0	0	0	0	0	0	0	0	0	0	0	0	0	0	0	0	0	0	0	0	0	0	0	0	0	0	0	0	0	0	0	0	0	0	0	88.68	361.77	697.12	1652.51	814.11	26.1	6.54	30.63	50	11.24	0	0
17	0	0	0	0	0	0	0	0	0	0	0	0	0	0	0	0	0	0	0	0	0	0	0	0	0	0	0	0	0	0	0	0	0	0	0	0	0	0	55.31	147.97	248.82	403.22	288.88	244.57	222.09	141.08	0	0	0
15	0	0	0	0	0	0	0	0	0	0	0	0	0	0	0	0	0	0	0	0	0	0	0	0	0	0	0	0	0	0	0	0	0	0	0	0	0	0	0	0	0	83.02	25.99	278.86	467.15	510.86	357.95	134.43	31.81
13	0	0	0	0	0	0	0	0	0	0	0	0	0	0	0	0	0	0	0	0	0	0	0	0	0	0	0	0	0	0	0	0	0	0	0	0	0	0	0	0	0	0	0	0	29.82	532.18	357.67	165.36	44.38
11	0	0	0	0	0	0	0	0	0	0	0	0	0	0	0	0	0	0	0	0	0	0	0	0	0	0	0	0	0	0	0	0	0	0	0	0	0	0	0	0	0	0	0	0	0	0	93.46	221.03	36.65
9	0	0	0	0	0	0	0	0	0	0	0	0	0	0	0	0	0	0	0	0	0	0	0	0	0	0	0	0	0	0	0	0	0	0	0	0	0	0	0	0	0	0	0	0	0	0	0	124.95	279.13
7	0	0	0	0	0	0	0	0	0	0	0	0	0	0	0	0	0	0	0	0	0	0	0	0	0	0	0	0	0	0	0	0	0	0	0	0	0	0	0	0	0	0	0	0	0	0	0	0	0
5	0	0	0	0	0	0	0	0	0	0	0	0	0	0	0	0	0	0	0	0	0	0	0	0	0	0	0	0	0	0	0	0	0	0	0	0	0	0	0	0	0	0	0	0	0	0	0	0	0
3	0	0	0	0	0	0	0	0	0	0	0	0	0	0	0	0	0	0	0	0	0	0	0	0	0	0	0	0	0	0	0	0	0	0	0	0	0	0	0	0	0	0	0	0	0	0	0	0	0
1	0	0	0	0	0	0	0	0	0	0	0	0	0	0	0	0	0	0	0	0	0	0	0	0	0	0	0	0	0	0	0	0	0	0	0	0	0	0	0	0	0	0	0	0	0	0	0	0	0
-1	0	0	0	0	0	0	0	0	0	0	0	0	0	0	0	0	0	0	0	0	0	0	0	0	0	0	0	0	0	0	0	0	0	0	0	0	0	0	0	0	0	0	0	0	0	0	0	0	0
-3	0	0	0	0	0	0	0	0	0	0	0	0	0	0	0	0	0	0	0	0	0	0	0	0	0	0	0	0	0	0	0	0	0	0	0	0	0	0	0	0	0	0	0	0	0	0	0	0	0
-5	0	0	0	0	0	0	0	0	0	0	0	0	0	0	0	0	0	0	0	0	0	0	0	0	0	0	0	0	0	0	0	0	0	0	0	0	0	0	0	0	0	0	0	0	0	0	0	0	0
-7	0	0	0	0	0	0	0	0	0	0	0	0	0	0	0	0	0	0	0	0	0	0	0	0	0	0	0	0	0	0	0	0	0	0	0	0	0	0	0	0	0	0	0	0	0	0	0	0	0
-9	0	0	0	0	0	0	0	0	0	0	0	0	0	0	0	0	0	0	0	0	0	0	0	0	0	0	0	0	0	0	0	0	0	0	0	0	0	0	0	0	0	0	0	0	0	0	0	0	0
-11	0	0	0	0	0	0	0	0	0	0	0	0	0	0	0	0	0	0	0	0	0	0	0	0	0	0	0	0	0	0	0	0	0	0	0	0	0	0	0	0	0	0	0	0	0	0	0	0	0
-13	0	0	0	0	0	0	0	0	0	0	0	0	0	0	0	0	0	0	0	0	0	0	0	0	0	0	0	0	0	0	0	0	0	0	0	0	0	0	0	0	0	0	0	0	0	0	0	0	0
-15	0	0	0	0	0	0	0	0	0	0	0	0	0	0	0	0	0	0	0	0	0	0	0	0	0	0	0	0	0	0	0	0	0	0	0	0	0	0	0	0	0	0	0	0	0	0	0	0	0
-17	0	0	0	0	0	0	0	0	0	0	0	0	0	0	0	0	0	0	0	0	0	0	0	0	0	0	0	0	0	0	0	0	0	0	0	0	0	0	0	0	0	0	0	0	0	0	0	0	0
-19	0	0	0	0	0	0	0	0	0	0	0	0	0	0	0	0	0	0	0	0	0	0	0	0	0	0	0	0	0	0	0	0	0	0	0	0	0	0	0	0	0	0	0	0	0	0	0	0	0
-21	0	0	0	0	0	0	0	0	0	0	0	0	0	0	0	0	0	0	0	0	0	0	0	0	0	0	0	0	0	0	0	0	0	0	0	0	0	0	0	0	0	0	0	0	0	0	0	0	0
-23	0	0	0	0	0	0	0	0	0	0	0	0	0	0	0	0	0	0	0	0	0	0	0	0	0	0	0	0	0	0	0	0	0	0	0	0	0	0	0	0	0	0	0	0	0	0	0	0	0
-25	0	0	0	0	0	0	0	0	0	0	0	0	0	0	0	0	0	0	0	0	0	0	0	0	0	0	0	0	0	0	0	0	0	0	0	0	0	0	0	0	0	0	0	0	0	0	0	0	0
-27	0	0	0	0	0	0	0	0	0	0	0	0	0	0	0	0	0	0	0	0	0	0	0	0	0	0	0	0	0	0	0	0	0	0	0	0	0	0	0	0	0	0	0	0	0	0	0	0	0
-29	0	0	0	0	0	0	0	0	0	0	0	0	0	0	0	0	0	0	0	0	0	0	0	0	0	0	0	0	0	0	0	0	0	0	0	0	0	0	0	0	0	0	0	0	0	0	0	0	0
-31	0	0	0	0	0	0	0	0	0	0	0	0	0	0	0	0	0	0	0	0	0	0	0	0	0	0	0	0	0	0	0	0	0	0	0	0	0	0	0	0	0	0	0	0	0	0	0	0	0
-33	0	0	0	0	0	0	0	0	0	0	0	0	0	0	0	0	0	0	0	0	0	0	0	0	0	0	0	0	0	0	0	0	0	0	0	0	0	0	0	0	0	0	0	0	0	0	0	0	0
-35	0	0	0	0	0	0	0	0	0	0	0	0	0	0	0	0	0	0	0	0	0	0	0	0	0	0	0	0	0	0	0	0	0	0	0	0	0	0	0	0	0	0	0	0	0	0	0	0	0
-37	0	0	0	0	0	0	0	0	0	0	0	0	0	0	0	0	0	0	0	0	0	0	0	0	0	0	0	0	0	0	0	0	0	0	0	0	0	0	0	0	0	0	0	0	0	0	0	0	0
-39	0	0	0	0	0	0	0	0	0	0	0	0	0	0	0	0	0	0	0	0	0	0	0	0	0	0	0	0	0	0	0	0	0	0	0	0	0	0	0	0	0	0	0	0	0	0	0	0	0
-41	0	0	0	0	0	0	0	0	0	0	0	0	0	0	0	0	0	0	0	0	0	0	0	0	0	0	0	0	0	0	0	0	0	0	0	0	0	0	0	0	0	0	0	0	0	0	0	0	0
-43	0	0	0	0	0	0	0	0	0	0	0	0	0	0	0	0	0	0	0	0	0	0	0	0	0	0	0	0	0	0	0	0	0	0	0	0	0	0	0	0	0	0	0	0	0	0	0	0	0
-45	0	0	0	0	0	0	0	0	0	0	0	0	0	0	0	0	0	0	0	0	0	0	0	0	0	0	0	0	0	0	0	0	0	0	0	0	0	0	0	0	0	0	0	0	0	0	0	0	0
-47	0	0	0	0	0	0	0	0	0	0	0	0	0	0	0	0	0	0	0	0	0	0	0	0	0	0	0	0	0	0	0	0	0	0	0	0	0	0	0	0	0	0	0	0	0	0	0	0	0
-49	0	0	0	0	0	0	0	0	0	0	0	0	0	0	0	0	0	0	0	0	0	0	0	0	0	0	0	0	0	0	0	0	0	0	0	0	0	0	0	0	0	0	0	0	0	0	0	0	0
-51	0	0	0	0	0	0	0	0	0	0	0	0	0	0	0	0	0	0	0	0	0	0	0	0	0	0	0	0	0	0	0	0	0	0	0	0	0	0	0	0	0	0	0	0	0	0	0	0	0
-53	0	0	0	0	0	0	0	0	0	0	0	0	0	0	0	0	0	0	0	0	0	0	0	0	0	0	0	0	0	0	0	0	0	0	0	0	0	0	0	0	0	0	0	0	0	0	0	0	0
-55	0	0	0	0	0	0	0	0	0	0	0	0	0	0	0	0	0	0	0	0	0	0	0	0	0	0	0	0	0	0	0	0	0	0	0	0	0	0	0	0	0	0	0	0	0	0	0	0	0
-57	0	0	0	0	0	0	0	0	0	0	0	0	0	0	0	0	0	0	0	0	0	0	0	0	0	0	0	0	0	0	0	0	0	0	0	0	0	0	0	0	0	0	0	0	0	0	0	0	0
-59	0	0	0	0	0	0	0	0	0	0	0	0	0	0	0	0	0	0	0	0	0	0	0	0	0	0	0	0	0	0	0	0	0	0	0	0	0	0	0	0	0	0	0	0	0	0	0	0	0
-61	0	0	0	0	0	0	0	0	0	0	0	0	0	0	0	0	0	0	0	0	0	0	0	0	0	0	0	0	0	0	0	0	0	0	0	0	0	0	0	0	0	0	0	0	0	0	0	0	0
-63	0	0	0	0	0	0	0	0	0	0	0	0	0	0	0	0	0	0	0	0	0	0	0	0	0	0	0	0	0	0	0	0	0	0	0	0	0	0	0	0	0	0	0	0	0	0	0	0	0
-65	0	0	0	0	0	0	0	0	0	0	0	0	0	0	0	0	0	0	0	0	0	0	0	0	0	0	0	0	0	0	0	0	0	0	0	0	0	0	0	0	0	0	0	0	0	0	0	0	0
-67	0	0	0	0	0	0	0	0	0	0	0	0	0	0	0	0	0	0	0	0	0	0	0	0	0	0	0	0	0	0	0	0	0	0	0	0	0	0	0	0	0	0	0	0	0	0	0	0	0
-69	0	0	0	0	0	0	0	0	0	0	0	0	0	0	0	0	0	0	0	0	0	0	0	0	0	0	0	0	0	0	0	0	0	0	0	0	0	0	0	0	0	0	0	0	0	0	0	0	0
-71	0	0	0	0	0	0	0	0	0	0	0	0	0	0	0	0	0	0	0	0	0	0	0	0	0	0	0	0	0	0	0	0	0	0	0	0	0	0	0	0.57	5.66	5.94	0.28	0	0	0	0	0	0
-73	0	0	0	0	0	0	0	0	0	0	0	0	0	0	0	0	0	0	0	0	0	0	0	0	0	0	0	0	149.53	69.7	81.58	36.14	0	0.84	2.53	0	0	0	0	5.68	19.72	33.62	41.1	36.45	31	26.21	25.62	26.23	30.67
-75	0	0	0	0	0	0	0	0	0	0	0	0	0	0	0	0	0	0	29.32	30.05	114.59	166.41	229.12	207.43	51.52	8.34	32.12	454.47	573.78	535.88	348.5	135.9	48.61	27.78	41.35	27.63	24.94	26.75	37.88	38.61	49.1	50	50	50	50	50	50	50	50
-77	0	0	0	0	0	0	0	0	0	0	0	19.51	25.99	13.73	11.45	23.17	496.08	689.1	410.61	506.57	446.84	506.01	539.65	492.17	421.33	363.81	542.1	339.02	211.26	264.14	106.7	29.33	59.46	50	50	50	50	50	50	50	51.66	69.35	192.46	251.51	335.01	357.75	369.3	291	210.8
-79	0	0	0	0	0	0	0	0	0	0	0	6.79	25.73	36.7	43.99	49.75	50	82.5	459.97	557.34	557.34	521.66	557.34	557.34	539.5	287.8	65.94	61.46	50	50	50	50	50	50	50	50	50	50	50	50	119.67	245.98	315.4	464.3	643.34	643.34	643.34	458.39	336.95
-81	0	0	0	0	0	0	0	0	0	0	0	0	0	18.85	21.71	27.09	37.69	50	50	50	50	50	50	50	50	50	50	50	50	50	50	50	50	50	50	50	53.23	62.16	91.98	128.65	145.24	236.3	189.84	235.63	350	326.39	244.67	249.72	78.15
-83	7.71	0	0	0	0	0	0	0	0	0	0	0	0	35.37	89.58	60.02	50	50	50	94.72	57.45	57.45	72.36	50	50	50	109.63	64.91	50	50	50	50	50	50	50	50	372.27	430.63	479.35	437.01	547.85	588.46	630.32	647.82	647.82	613.99	433.31	344.2	275.52
-85	2450	2450	2450	2450	2354.85	2450	2136.85	1319.25	401.24	40.14	119.26	138.72	30.94	26.73	452.57	460.85	234.38	2425.9	2450	2450	2450	2450	2450	2450	2450	2450	2450	2450	2450	2450	2450	2408.86	2450	2450	2450	2450	2437.05	2450	2450	2450	2362.13	2259.61	2075.88	1797.8	1284.74	1291.7	1499.77	1681.66	1637.92
-87	2550.03	2550.03	2550.03	2550.03	2550.03	2550.03	2528.59	2450	2450	2450	2450	2450	2450	2450	2450	2450	2450	2450	2450	2450	2450	2450	2450	2450	2450	2450	2450	2450	2450	2450	2450	2450	2450	2450	2450	2450	2450	2450	2450	2450	2450	2453.44	2546.87	2605.4	2605.4	2550.03	2554.29	2605.4	2605.4
-89	3450	3450	3450	3450	3450	3450	3398.98	3033.89	2450	2450	2450	2450	2450	2450	2450	2450	2450	2450	2450	2450	2450	2450	2450	2450	2450	2450	2450	2450	2450	2450	2450	2450	2450	2450	2450	2450	2450	2450	2450	2450	2487.36	3084.7	3450	3450	3450	3450	3450	3450	3450
[truncated: 131 more columns]
