# Supplementary material for: Pliocene Model Intercomparison Project (PlioMIP): experimental design and boundary conditions (Experiment 2)
Source: Copernicus journal article supplement (doi:10.5194/gmd-4-571-2011), 2011-07-01
Supplement: Supplementary file 2 [file gmd-4-571-2011-supplement.zip › PlioMIP_exp2_version1/exp2_preferred/topo_v1.1.xls]

## Sheet: MCPlio v4 BAS topo.xls.txt
	-179	-177	-175	-173	-171	-169	-167	-165	-163	-161	-159	-157	-155	-153	-151	-149	-147	-145	-143	-141	-139	-137	-135	-133	-131	-129	-127	-125	-123	-121	-119	-117	-115	-113	-111	-109	-107	-105	-103	-101	-99	-97	-95	-93	-91	-89	-87	-85	-83
89	0	0	0	0	0	0	0	0	0	0	0	0	0	0	0	0	0	0	0	0	0	0	0	0	0	0	0	0	0	0	0	0	0	0	0	0	0	0	0	0	0	0	0	0	0	0	0	0	0
87	0	0	0	0	0	0	0	0	0	0	0	0	0	0	0	0	0	0	0	0	0	0	0	0	0	0	0	0	0	0	0	0	0	0	0	0	0	0	0	0	0	0	0	0	0	0	0	0	0
85	0	0	0	0	0	0	0	0	0	0	0	0	0	0	0	0	0	0	0	0	0	0	0	0	0	0	0	0	0	0	0	0	0	0	0	0	0	0	0	0	0	0	0	0	0	0	0	0	0
83	0	0	0	0	0	0	0	0	0	0	0	0	0	0	0	0	0	0	0	0	0	0	0	0	0	0	0	0	0	0	0	0	0	0	0	0	0	0	0	0	0	0	0	0	0	0	0	0	0
81	0	0	0	0	0	0	0	0	0	0	0	0	0	0	0	0	0	0	0	0	0	0	0	0	0	0	0	0	0	0	0	0	0	0	0	0	0	0	0	0	0	0	0	39.1	5.31	19.55	263.56	508.75	959.21
79	0	0	0	0	0	0	0	0	0	0	0	0	0	0	0	0	0	0	0	0	0	0	0	0	0	0	0	0	0	0	0	0	0	0	0	0	0	0	0	0	0	0	0	437.34	725	686.96	347.98	73.05	395.91
77	0	0	0	0	0	0	0	0	0	0	0	0	0	0	0	0	0	0	0	0	0	0	0	0	0	0	0	0	0	0.21	4.94	7.49	0	0	0	0	0	0	0	0	0	0	0	0	200.44	67.65	173.82	280.59	274.2
75	0	0	0	0	0	0	0	0	0	0	0	0	0	0	0	0	0	0	0	0	0	0	0	0	0	0	0	0	1.2	5.9	4.35	0.62	159.67	120.37	80.47	2.88	1.2	0	3.13	13.15	22.56	0	113.72	28.67	258.81	11.02	15.14	188.99	405.52
73	0	0	0	0	0	0	0	0	0	0	0	0	0	0	0	0	0	0	0	0	0	0	0	0	0	0	0	0	110.58	293.83	94.48	84.38	47.52	1.47	21.61	0	3.42	0.76	0	0	10.99	0.84	164.9	87.87	71.74	68.89	565.7	86.91	153.56
71	0	0	0	0	0	0	0	0	0	0	0	0	0	0	0	0	0	0	0	0	0	0	0	0	0	0	0	0	133.07	204.27	25.81	37.85	89.22	113.36	198.14	132.24	30.22	19.6	0	0	9.65	9.6	121.19	39.61	0	361.95	161.2	165.05	188.43
69	0	0	0	0	0	0	0	0	30.84	218.45	203.45	135.67	276.07	307.78	249.4	254.21	215.85	204.28	186.69	125.58	65.76	16.84	3.69	4.75	8.01	81.44	149.62	81.87	64.75	128.87	42.31	131.51	25	99.25	133.03	123.42	34.52	19.46	19.48	0	0	2.74	80.03	26.85	8.05	75.04	0	170.89	146.78
67	325	291.61	94.13	0	0	0	0	9.38	84.56	165.34	241.77	310.4	325	325	325	325	325	325	325	325	308.04	256.71	115.5	34.13	25	64.12	224.34	305.4	325	325	317.58	271.47	256.85	252.38	249.72	216.53	266.28	309.16	204.81	57.69	13.7	24.04	48.26	173.24	210.76	238.73	61.59	216.57	198.85
65	75.83	113.91	268.65	169.54	52.02	0	127.72	95.53	25	26.89	87.77	88.03	179.97	239.22	247.47	294.6	325	325	325	325	463.11	702.05	640.77	603.73	672.89	592.79	55.74	43.39	112.68	242	297.88	325	325	325	325	325	325	325	325	325	178.97	100.41	117.53	142.21	165.57	148.43	91.14	75.08	26.02
63	0	0	0	3.84	0	0	0	0	9.31	42.87	58.13	84.11	115.02	152.16	390.19	475.24	569.17	581.38	506.22	325	334.93	468.98	519.39	646.42	725	725	604.84	237.7	105.87	25	43.84	140.16	262.88	325	325	325	325	325	325	325	301.34	132.28	114.29	75.77	55.4	26.59	25	65.08	34.22
61	0	0	0	0	0	0	0	3.74	24.43	80.44	115.95	112.88	190.22	567.9	636.59	629.69	714.8	817.24	634.54	627.86	628.36	583.39	470.61	459.21	725	725	725	725	717.52	450.96	242.77	309.42	325	325	325	325	325	325	325	325	325	160.43	53.29	25	25	25	25	25	25
59	0	0	0	0	0	0	0	30.89	2.05	62.43	93.45	31.41	246.6	594.2	245.58	101.43	0	5.17	140.49	140.49	366.78	503.93	613.77	694.66	725	725	725	725	725	705.62	356.2	325	325	325	325	325	325	325	325	325	325	265.46	52	25	25	25	25	25	25
57	0	0	0	0	0	0	0	0	0	0	0.45	18.24	38.6	0	0	0	0	0	0	0	0	0.93	24.02	327.01	692.39	725	725	725	725	725	552.9	329.85	325	325	325	325	325	325	325	325	325	325	119.39	34.02	25	25	25	25	25
55	0	0	0	0	0	0	0	0	0	0	5.51	0	0	0	0	0	0	0	0	0	0	0	0	0	338.7	503.52	725	725	562.56	989.49	1489.36	712.79	538.53	488.7	333.97	325	325	325	325	325	325	212.12	125	118.55	97.45	52.95	26.69	25	25
53	0	0	0	0	0	0	0	0	0	0	0	0	0	0	0	0	0	0	0	0	0	0	0	0	0	565.28	656.09	725	638.26	706.42	1924.47	1928.43	990.86	725	556.57	406.82	325	325	325	325	325	312.07	281.96	250.31	233.81	225.51	153.54	52.76	25
51	0	0	0	0	0	0	0	0	0	0	0	0	0	0	0	0	0	0	0	0	0	0	0	0	0	15.11	562.19	679.6	791.55	776.23	881.44	1793.48	2313.51	1282.19	725	725	629.63	437.7	325	325	325	325	325	325	325	325	320.35	169.99	47.15
49	0	0	0	0	0	0	0	0	0	0	0	0	0	0	0	0	0	0	0	0	0	0	0	0	0	0	184.61	646.62	1153.32	1571.47	854.18	638.09	1093.92	2038.34	1870.92	798.75	725	725	507.92	325	325	325	325	325	325	325	325	315.97	256.72
47	0	0	0	0	0	0	0	0	0	0	0	0	0	0	0	0	0	0	0	0	0	0	0	0	0	0	0	0	455.77	314.53	577.77	515.13	725	1211.6	2425	1703.13	725	725	694.46	325	325	325	325	325	325	325	325	325	325
45	0	0	0	0	0	0	0	0	0	0	0	0	0	0	0	0	0	0	0	0	0	0	0	0	0	0	0	0	448.72	211.85	1030.25	725	734.5	1972.25	2980.8	2378.99	1145.25	725	725	433.2	325	325	325	325	325	325	325	325	325
43	0	0	0	0	0	0	0	0	0	0	0	0	0	0	0	0	0	0	0	0	0	0	0	0	0	0	0	0	208	538.27	987.73	786.13	795.22	1884.44	2425	2425	2360.48	1323.87	753.41	592.83	325	325	325	325	325	325	325	325	325
41	0	0	0	0	0	0	0	0	0	0	0	0	0	0	0	0	0	0	0	0	0	0	0	0	0	0	0	0	613.35	474.46	1513.61	1341.03	1922.02	2425	2425	2425	2753.14	2588.04	1009.71	711.97	349.4	325	325	325	325	292	164.19	315.7	325
39	0	0	0	0	0	0	0	0	0	0	0	0	0	0	0	0	0	0	0	0	0	0	0	0	0	0	0	0	312.69	252.58	841.17	1531.53	1900.74	2425	2425	2425	2758.69	3006.5	1101.12	725	417.31	325	325	325	325	260.67	125	200.9	325
37	0	0	0	0	0	0	0	0	0	0	0	0	0	0	0	0	0	0	0	0	0	0	0	0	0	0	0	0	0.87	249.96	513.3	1235.33	1266.31	1991.77	2425	2425	2419.53	2471.82	1452.44	725	433.97	325	231.49	187.21	186.03	72.73	114.9	304.18	327.39
35	0	0	0	0	0	0	0	0	0	0	0	0	0	0	0	0	0	0	0	0	0	0	0	0	0	0	0	0	0	199.51	435.66	523.62	590.26	764.86	1982.38	2415.55	2223.54	1794.77	750.73	725	485.55	323.97	290.59	207.98	95.2	26.63	113.47	286.02	378.45
33	0	0	0	0	0	0	0	0	0	0	0	0	0	0	0	0	0	0	0	0	0	0	0	0	0	0	0	0	0	0	39.27	155.34	171.27	371.58	703.52	894.5	836.1	725	725	589.48	381.48	178.67	89.9	47.89	25.67	25	57.95	105.58	86.87
31	0	0	0	0	0	0	0	0	0	0	0	0	0	0	0	0	0	0	0	0	0	0	0	0	0	0	0	0	0	0	0	73.62	689.67	121.17	518.01	725	1195.56	856.8	725	564.75	325	142.26	27.45	24.39	22.59	25	24.56	25	25
29	0	0	0	0	0	0	0	0	0	0	0	0	0	0	0	0	0	0	0	0	0	0	0	0	0	0	0	0	0	0	0	0	409.44	243.94	224.86	602.53	966.56	1983.75	790.89	582.86	300.02	88.35	2.8	0	0	0	0	0	0
27	0	0	0	0	0	0	0	0	0	0	0	0	0	0	0	0	0	0	0	0	0	0	0	0	0	0	0	0	0	0	0	0	0	145.54	4.63	275.72	669.58	1339.33	1993.4	534.2	225	8.02	0	0	0	0	0	0	0
25	0	0	0	0	0	0	0	0	0	0	0	0	0	0	0	0	0	0	0	0	0	0	0	0	0	0	0	0	0	0	0	0	0	0	0	7.42	398.38	703.59	1779.45	1423.22	362.26	0	0	0	0	0	0	0	0
23	0	0	0	0	0	0	0	0	0	0	0	0	0	0	0	0	0	0	0	0	0	0	0	0	0	0	0	0	0	0	0	0	0	0	0	0	13.26	503	1032.34	2073.77	491.95	6.99	0	0	0	0	0	0	0
21	0	0	0	0	0	0	0	0	0	0	0	0	0	0	0	0	0	0	0	0	0	0	0	0	0	0	0	0	0	0	0	0	0	0	0	0	0	164.87	627.76	2228.57	1250.56	77.44	0	0	0	0	0	0	0
19	0	0	0	0	0	0	0	0	0	0	0	0	0	0	0	0	0	0	0	0	0	0	0	0	0	0	0	0	0	0	0	0	0	0	0	0	0	63.68	336.77	672.12	1627.51	789.11	1.1	0	5.63	25	0	0	0
17	0	0	0	0	0	0	0	0	0	0	0	0	0	0	0	0	0	0	0	0	0	0	0	0	0	0	0	0	0	0	0	0	0	0	0	0	0	0	30.31	122.97	223.82	378.22	263.88	219.57	197.09	116.08	0	0	0
15	0	0	0	0	0	0	0	0	0	0	0	0	0	0	0	0	0	0	0	0	0	0	0	0	0	0	0	0	0	0	0	0	0	0	0	0	0	0	0	0	0	58.02	0.99	253.86	442.15	485.86	332.95	109.43	6.81
13	0	0	0	0	0	0	0	0	0	0	0	0	0	0	0	0	0	0	0	0	0	0	0	0	0	0	0	0	0	0	0	0	0	0	0	0	0	0	0	0	0	0	0	0	4.82	507.18	332.67	140.36	19.38
11	0	0	0	0	0	0	0	0	0	0	0	0	0	0	0	0	0	0	0	0	0	0	0	0	0	0	0	0	0	0	0	0	0	0	0	0	0	0	0	0	0	0	0	0	0	0	68.46	196.03	11.65
9	0	0	0	0	0	0	0	0	0	0	0	0	0	0	0	0	0	0	0	0	0	0	0	0	0	0	0	0	0	0	0	0	0	0	0	0	0	0	0	0	0	0	0	0	0	0	0	99.95	254.13
7	0	0	0	0	0	0	0	0	0	0	0	0	0	0	0	0	0	0	0	0	0	0	0	0	0	0	0	0	0	0	0	0	0	0	0	0	0	0	0	0	0	0	0	0	0	0	0	0	0
5	0	0	0	0	0	0	0	0	0	0	0	0	0	0	0	0	0	0	0	0	0	0	0	0	0	0	0	0	0	0	0	0	0	0	0	0	0	0	0	0	0	0	0	0	0	0	0	0	0
3	0	0	0	0	0	0	0	0	0	0	0	0	0	0	0	0	0	0	0	0	0	0	0	0	0	0	0	0	0	0	0	0	0	0	0	0	0	0	0	0	0	0	0	0	0	0	0	0	0
1	0	0	0	0	0	0	0	0	0	0	0	0	0	0	0	0	0	0	0	0	0	0	0	0	0	0	0	0	0	0	0	0	0	0	0	0	0	0	0	0	0	0	0	0	0	0	0	0	0
-1	0	0	0	0	0	0	0	0	0	0	0	0	0	0	0	0	0	0	0	0	0	0	0	0	0	0	0	0	0	0	0	0	0	0	0	0	0	0	0	0	0	0	0	0	0	0	0	0	0
-3	0	0	0	0	0	0	0	0	0	0	0	0	0	0	0	0	0	0	0	0	0	0	0	0	0	0	0	0	0	0	0	0	0	0	0	0	0	0	0	0	0	0	0	0	0	0	0	0	0
-5	0	0	0	0	0	0	0	0	0	0	0	0	0	0	0	0	0	0	0	0	0	0	0	0	0	0	0	0	0	0	0	0	0	0	0	0	0	0	0	0	0	0	0	0	0	0	0	0	0
-7	0	0	0	0	0	0	0	0	0	0	0	0	0	0	0	0	0	0	0	0	0	0	0	0	0	0	0	0	0	0	0	0	0	0	0	0	0	0	0	0	0	0	0	0	0	0	0	0	0
-9	0	0	0	0	0	0	0	0	0	0	0	0	0	0	0	0	0	0	0	0	0	0	0	0	0	0	0	0	0	0	0	0	0	0	0	0	0	0	0	0	0	0	0	0	0	0	0	0	0
-11	0	0	0	0	0	0	0	0	0	0	0	0	0	0	0	0	0	0	0	0	0	0	0	0	0	0	0	0	0	0	0	0	0	0	0	0	0	0	0	0	0	0	0	0	0	0	0	0	0
-13	0	0	0	0	0	0	0	0	0	0	0	0	0	0	0	0	0	0	0	0	0	0	0	0	0	0	0	0	0	0	0	0	0	0	0	0	0	0	0	0	0	0	0	0	0	0	0	0	0
-15	0	0	0	0	0	0	0	0	0	0	0	0	0	0	0	0	0	0	0	0	0	0	0	0	0	0	0	0	0	0	0	0	0	0	0	0	0	0	0	0	0	0	0	0	0	0	0	0	0
-17	0	0	0	0	0	0	0	0	0	0	0	0	0	0	0	0	0	0	0	0	0	0	0	0	0	0	0	0	0	0	0	0	0	0	0	0	0	0	0	0	0	0	0	0	0	0	0	0	0
-19	0	0	0	0	0	0	0	0	0	0	0	0	0	0	0	0	0	0	0	0	0	0	0	0	0	0	0	0	0	0	0	0	0	0	0	0	0	0	0	0	0	0	0	0	0	0	0	0	0
-21	0	0	0	0	0	0	0	0	0	0	0	0	0	0	0	0	0	0	0	0	0	0	0	0	0	0	0	0	0	0	0	0	0	0	0	0	0	0	0	0	0	0	0	0	0	0	0	0	0
-23	0	0	0	0	0	0	0	0	0	0	0	0	0	0	0	0	0	0	0	0	0	0	0	0	0	0	0	0	0	0	0	0	0	0	0	0	0	0	0	0	0	0	0	0	0	0	0	0	0
-25	0	0	0	0	0	0	0	0	0	0	0	0	0	0	0	0	0	0	0	0	0	0	0	0	0	0	0	0	0	0	0	0	0	0	0	0	0	0	0	0	0	0	0	0	0	0	0	0	0
-27	0	0	0	0	0	0	0	0	0	0	0	0	0	0	0	0	0	0	0	0	0	0	0	0	0	0	0	0	0	0	0	0	0	0	0	0	0	0	0	0	0	0	0	0	0	0	0	0	0
-29	0	0	0	0	0	0	0	0	0	0	0	0	0	0	0	0	0	0	0	0	0	0	0	0	0	0	0	0	0	0	0	0	0	0	0	0	0	0	0	0	0	0	0	0	0	0	0	0	0
-31	0	0	0	0	0	0	0	0	0	0	0	0	0	0	0	0	0	0	0	0	0	0	0	0	0	0	0	0	0	0	0	0	0	0	0	0	0	0	0	0	0	0	0	0	0	0	0	0	0
-33	0	0	0	0	0	0	0	0	0	0	0	0	0	0	0	0	0	0	0	0	0	0	0	0	0	0	0	0	0	0	0	0	0	0	0	0	0	0	0	0	0	0	0	0	0	0	0	0	0
-35	0	0	0	0	0	0	0	0	0	0	0	0	0	0	0	0	0	0	0	0	0	0	0	0	0	0	0	0	0	0	0	0	0	0	0	0	0	0	0	0	0	0	0	0	0	0	0	0	0
-37	0	0	0	0	0	0	0	0	0	0	0	0	0	0	0	0	0	0	0	0	0	0	0	0	0	0	0	0	0	0	0	0	0	0	0	0	0	0	0	0	0	0	0	0	0	0	0	0	0
-39	0	0	0	0	0	0	0	0	0	0	0	0	0	0	0	0	0	0	0	0	0	0	0	0	0	0	0	0	0	0	0	0	0	0	0	0	0	0	0	0	0	0	0	0	0	0	0	0	0
-41	0	0	0	0	0	0	0	0	0	0	0	0	0	0	0	0	0	0	0	0	0	0	0	0	0	0	0	0	0	0	0	0	0	0	0	0	0	0	0	0	0	0	0	0	0	0	0	0	0
-43	0	0	0	0	0	0	0	0	0	0	0	0	0	0	0	0	0	0	0	0	0	0	0	0	0	0	0	0	0	0	0	0	0	0	0	0	0	0	0	0	0	0	0	0	0	0	0	0	0
-45	0	0	0	0	0	0	0	0	0	0	0	0	0	0	0	0	0	0	0	0	0	0	0	0	0	0	0	0	0	0	0	0	0	0	0	0	0	0	0	0	0	0	0	0	0	0	0	0	0
-47	0	0	0	0	0	0	0	0	0	0	0	0	0	0	0	0	0	0	0	0	0	0	0	0	0	0	0	0	0	0	0	0	0	0	0	0	0	0	0	0	0	0	0	0	0	0	0	0	0
-49	0	0	0	0	0	0	0	0	0	0	0	0	0	0	0	0	0	0	0	0	0	0	0	0	0	0	0	0	0	0	0	0	0	0	0	0	0	0	0	0	0	0	0	0	0	0	0	0	0
-51	0	0	0	0	0	0	0	0	0	0	0	0	0	0	0	0	0	0	0	0	0	0	0	0	0	0	0	0	0	0	0	0	0	0	0	0	0	0	0	0	0	0	0	0	0	0	0	0	0
-53	0	0	0	0	0	0	0	0	0	0	0	0	0	0	0	0	0	0	0	0	0	0	0	0	0	0	0	0	0	0	0	0	0	0	0	0	0	0	0	0	0	0	0	0	0	0	0	0	0
-55	0	0	0	0	0	0	0	0	0	0	0	0	0	0	0	0	0	0	0	0	0	0	0	0	0	0	0	0	0	0	0	0	0	0	0	0	0	0	0	0	0	0	0	0	0	0	0	0	0
-57	0	0	0	0	0	0	0	0	0	0	0	0	0	0	0	0	0	0	0	0	0	0	0	0	0	0	0	0	0	0	0	0	0	0	0	0	0	0	0	0	0	0	0	0	0	0	0	0	0
-59	0	0	0	0	0	0	0	0	0	0	0	0	0	0	0	0	0	0	0	0	0	0	0	0	0	0	0	0	0	0	0	0	0	0	0	0	0	0	0	0	0	0	0	0	0	0	0	0	0
-61	0	0	0	0	0	0	0	0	0	0	0	0	0	0	0	0	0	0	0	0	0	0	0	0	0	0	0	0	0	0	0	0	0	0	0	0	0	0	0	0	0	0	0	0	0	0	0	0	0
-63	0	0	0	0	0	0	0	0	0	0	0	0	0	0	0	0	0	0	0	0	0	0	0	0	0	0	0	0	0	0	0	0	0	0	0	0	0	0	0	0	0	0	0	0	0	0	0	0	0
-65	0	0	0	0	0	0	0	0	0	0	0	0	0	0	0	0	0	0	0	0	0	0	0	0	0	0	0	0	0	0	0	0	0	0	0	0	0	0	0	0	0	0	0	0	0	0	0	0	0
-67	0	0	0	0	0	0	0	0	0	0	0	0	0	0	0	0	0	0	0	0	0	0	0	0	0	0	0	0	0	0	0	0	0	0	0	0	0	0	0	0	0	0	0	0	0	0	0	0	0
-69	0	0	0	0	0	0	0	0	0	0	0	0	0	0	0	0	0	0	0	0	0	0	0	0	0	0	0	0	0	0	0	0	0	0	0	0	0	0	0	0	0	0	0	0	0	0	0	0	0
-71	0	0	0	0	0	0	0	0	0	0	0	0	0	0	0	0	0	0	0	0	0	0	0	0	0	0	0	0	0	0	0	0	0	0	0	0	0	0	0	0	0	0	0	0	0	0	0	0	0
-73	0	0	0	0	0	0	0	0	0	0	0	0	0	0	0	0	0	0	0	0	0	0	0	0	0	0	0	0	124.53	44.7	56.58	11.14	0	0	0	0	0	0	0	0	0	0	0	0	0	0	0	0	0
-75	0	0	0	0	0	0	0	0	0	0	0	0	0	0	0	0	0	0	0	5.05	89.59	141.41	204.12	182.43	26.52	0	7.12	429.47	548.78	510.88	323.5	110.9	23.61	0	0	0	0	0	0	0	0	0	0	0	0	0	0	0	0
-77	0	0	0	0	0	0	0	0	0	0	0	0	0	0	0	0	471.08	664.1	385.61	481.57	421.84	481.01	514.65	467.17	396.33	338.81	517.1	314.02	186.26	239.14	81.7	4.33	0	0	0	0	0	0	0	0	0	44.35	167.46	226.51	310.01	332.75	344.3	266	185.8
-79	0	0	0	0	0	0	0	0	0	0	0	0	0	0	0	0	0	57.5	434.97	532.34	532.34	496.66	532.34	532.34	514.5	262.8	0	0	0	0	0	0	0	0	0	0	0	0	0	0	94.67	220.98	290.4	439.3	618.34	618.34	618.34	433.39	311.95
-81	0	0	0	0	0	0	0	0	0	0	0	0	0	0	0	0	0	0	0	0	0	0	0	0	0	0	0	0	0	0	0	0	0	0	0	0	0	37.16	66.98	103.65	120.24	211.3	164.84	210.63	325	301.39	219.67	224.72	53.15
-83	0	0	0	0	0	0	0	0	0	0	0	0	0	0	0	0	0	0	0	0	0	0	0	0	0	0	0	0	0	0	0	0	0	0	0	0	347.27	405.63	454.35	412.01	522.85	563.46	605.32	622.82	622.82	588.99	408.31	319.2	250.52
-85	2425	2425	2425	2425	2329.85	2425	2111.85	1294.25	376.24	15.14	0	0	0	0	427.57	435.85	209.38	2400.9	2425	2425	2425	2425	2425	2425	2425	2425	2425	2425	2425	2425	2425	2383.86	2425	2425	2425	2425	2412.05	2425	2425	2425	2337.13	2234.61	2050.88	1772.8	1259.74	1266.7	1474.77	1656.66	1612.92
-87	2525.03	2525.03	2525.03	2525.03	2525.03	2525.03	2503.59	2425	2425	2425	2425	2425	2425	2425	2425	2425	2425	2425	2425	2425	2425	2425	2425	2425	2425	2425	2425	2425	2425	2425	2425	2425	2425	2425	2425	2425	2425	2425	2425	2425	2425	2428.44	2521.87	2580.4	2580.4	2525.03	2529.29	2580.4	2580.4
-89	3425	3425	3425	3425	3425	3425	3373.98	3008.89	2425	2425	2425	2425	2425	2425	2425	2425	2425	2425	2425	2425	2425	2425	2425	2425	2425	2425	2425	2425	2425	2425	2425	2425	2425	2425	2425	2425	2425	2425	2425	2425	2462.36	3059.7	3425	3425	3425	3425	3425	3425	3425
[truncated: 131 more columns]
