# Supplementary material for: Pliocene Model Intercomparison Project (PlioMIP): experimental design and boundary conditions (Experiment 2)
Source: Copernicus journal article supplement (doi:10.5194/gmd-4-571-2011), 2011-07-01
Supplement: Supplementary file 2 [file gmd-4-571-2011-supplement.zip › PlioMIP_exp2_version1/protocols_and_notes/exp_1_protocol.html]

 PlioMIP Experiment #1 Simulation Setup


 *PlioMIP Experiment 1 Simulation Setup*

*see notes*
Pre-industrial (PI) for PMIP3/CMIP5 experiments  
The pre-industrial control should be the same as the one used for CMIP5 experiments. It is thus the same reference as the one for 20th century simulations and future climate projections (see taylor\_cmip5\_dec31.pdf on the PMIP3 wiki).
PI for groups **only** running PMIP3 experiments  
 (see details below)

**Control Experiment 1**

**Model Coupling** || Atmosphere Only | | | |

**Integration Length** || 50 years | | | |

**Oceans** | | | || **Ocean Mode** | | **Ocean Input** | |
| Specified SST Climatology | | Local Modern SST Climatology | |

**Geographic Boundary Conditions** | | | || Land/Sea Mask | Topography | Ice Sheets | Vegetation |
| Local Modern | Local Modern | Local Modern | Pre-industrial including land use |

**Greenhouse Gases** | | | | || CO2 | N2O | CH4 | CFCs | O3 |
| 280 ppm | 270 ppb | 760 ppb | 0 | Local Modern |

**Solar Constant** || 1365 W/m² | | | |

**Aerosols** || Pre-industrial | | | |

**Model Spin-up** || Documented by individual groups | | | |

**Orbital Parameters** || [ecc = 0.016724] - [obl = 23.446°] - [peri - 180° = 102.04°] Date of vernal equinox March 21 at noon | | | |


---


**Pliocene Experiment 1**  

**Model Coupling** || Atmosphere Only | | | | |

**Integration Length** || 50 years | | | | |

**Oceans** | | | | || **Ocean Mode** | | **Deep Ocean Input** | |
| Specified SST Climatology | | *none* | |

**Preferred Boundary Conditions** | | | | || Land/Sea Mask | Topography | Ice Sheets | Vegetation | SST |
| *land\_fraction\_v1.1* | *topo\_v1.1\** | *biome\_veg\_v1.3* or *mbiome\_veg\_v1.3* | *biome\_veg\_v1.3* or *mbiome\_veg\_v1.3* | *PRISM3\_SST\_v1.1\** |

**Alternate Boundary Conditions** | | | | || Land/Sea Mask | Topography | Ice Sheets | Vegetation | SST |
| *use your local modern land/sea mask* | *topo\_v1.4\** | *biome\_veg\_v1.2* or *mbiome\_veg\_v1.2* | *biome\_veg\_v1.2* or *mbiome\_veg\_v1.2* | *PRISM3\_SST\_v1.3\** |

**Greenhouse Gases** | | | | || CO2 | N2O | CH4 | CFCs | O3 |
| 405 ppm | As PI Control | As PI Control | As PI Control | As PI Control |

**Solar Constant** || As PI Control | | | | |

**Aerosols** || As PI Control | | | | |

**Model Spin-up** || Documented by individual groups | | | | |

**Orbital Parameters** || As PI Control | | | | |

\* Apply using anomaly method *see notes*
